# Supplementary material
Source: PubMed Central journal article supplement (PMC4291770)

## Nonracemic Allylic Boronates through Enantiotopic-Group-Selective Cross-Coupling of Geminal Bis(boronates) and Vinyl Halides

Bowman Potter, Adam A. Szymaniak,<sup>§</sup> Emma K. Edelstein,<sup>§</sup> and James P. Morken\*

*Department of Chemistry, Merkert Chemistry Center, Boston College, Chestnut Hill, Massachusetts 02467*

### Table of Contents

|                                                                            | Page |
|----------------------------------------------------------------------------|------|
| I. General Information                                                     | 2    |
| II. Ligand Synthesis                                                       | 3    |
| III. Ligand Optimization                                                   | 6    |
| IV. Synthesis and Characterization of Geminal Bis(boronates)               | 8    |
| V. Synthesis and Characterization of Vinyl Bromides                        | 11   |
| VI. Procedures for Enantiotopic-Group-Selective Suzuki Coupling            | 14   |
| VII. Characterization of Reaction Products and Analysis of Stereochemistry | 15   |
| VIII. Further Transformations of Allylic Boronate <b>12</b>                | 37   |
| IX. Structure Proof of <b>19</b>                                           | 40   |
| X. Cross-Coupling of ( <i>S</i> )- <b>10B-20</b>                           | 42   |
| XI. X-Ray Crystallographic Data for <b>L6PdCl<sub>2</sub></b>              | 46   |
| XII. <sup>1</sup> H NMR and <sup>13</sup> C NMR Spectra                    | 83   |

## **I. General Information**

<sup>1</sup>H NMR spectra were recorded on either a Varian Gemini-500 (500 MHz), Varian Inova-500 (500 MHz), or Varian Gemini-600 (600 MHz) spectrometer. Chemical shifts are reported in ppm with the solvent resonance as the internal standard (CDCl<sub>3</sub>: 7.26 ppm). Data are reported as follows: chemical shift, integration, multiplicity (s = singlet, d = doublet, t = triplet, q = quartet, p = pentet, m = multiplet), and coupling constants (Hz). <sup>13</sup>C NMR spectra were recorded on either a Varian Gemini-500 (125 MHz), or Varian Gemini-600 (150 MHz) spectrometer with complete proton decoupling. Chemical shifts are reported in ppm with the solvent resonance as the internal standard (CDCl<sub>3</sub>: 77.16 ppm). <sup>31</sup>P NMR spectra were recorded on a Varian Gemini-500 (202 MHz), or Varian Gemini-600 (240 MHz) spectrometer. Chemical shifts are reported in ppm using phosphoric acid as the external standard (H<sub>3</sub>PO<sub>4</sub>: 0.0 ppm). <sup>11</sup>B NMR spectra were recorded on a Varian Gemini-500 (128 MHz) spectrometer. <sup>19</sup>F NMR spectra were recorded on a Varian Gemini-500 (470 MHz) spectrometer. Infrared (IR) spectra were recorded on a Bruker alpha-P Spectrometer. Frequencies are reported in wavenumbers (cm<sup>-1</sup>) as follows: strong (s), broad (br), medium (m), and weak (w). Optical rotations were measured on a Rudolph Analytical Research Autopol IV Polarimeter. High-resolution mass spectrometry (ESI+) was performed at the Mass Spectrometry Facility, Boston College, Chestnut Hill, MA.

Liquid chromatography was performed using forced flow (flash chromatography) on silica gel (SiO<sub>2</sub>, 230 x 450 Mesh) purchased from Silicycle. Thin layer chromatography (TLC) was performed on 25 μm silica gel glass backed plates from Silicycle. Visualization was performed using ultraviolet light (254 nm) and ceric ammonium molybdate (CAM) in ethanol.

Analytical chiral supercritical fluid chromatography (SFC) was performed on a TharSFC Method Station II equipped with Waters 2998 Photodiode Array Detector with isopropanol or methanol as the modifier. Analytical chiral gas chromatography (GC) was performed on an Agilent Technologies 6850 Network GC System equipped with a Flame Ionization Detector.

All reactions were conducted in oven- or flame-dried glassware under an inert atmosphere of nitrogen or argon. Tetrahydrofuran (THF), diethyl ether (Et<sub>2</sub>O), dichloromethane (CH<sub>2</sub>Cl<sub>2</sub>), and toluene were purified using Pure Solv MD-4 solvent purification system, from Innovative Technology, Inc., by passing the solvent through two activated alumina columns after purging with argon. Hexane was purified using a Glass Contour solvent purification system custom manufactured by SG Waters, LLC (Nashua, NH). Bis(pinacolato)diboron was generously

donated by Allychem Co., Ltd. and used without further purification. Palladium (II) acetate, bis(acetonitrile)dichloropalladium (II), di-*tert*-butylchlorophosphine, **L2**, and **L3** were purchased from Strem Chemicals, Inc. and used without further purification. Lithium 2,2,6,6-tetramethylpiperidide (LTMP), bis(4-trifluoromethylphenyl)phosphine, **L4**, and **L5** were purchased from Aldrich and used without purification. 1-Bromo-2-methylprop-1-ene was purchased from Combi-Blocks and used without further purification. All other reagents were purchased from either Aldrich, Alfa Aesar or Acros and used without further purification. **L1** was prepared according to a literature procedure.<sup>1</sup>

## II. Ligand Synthesis and Characterization

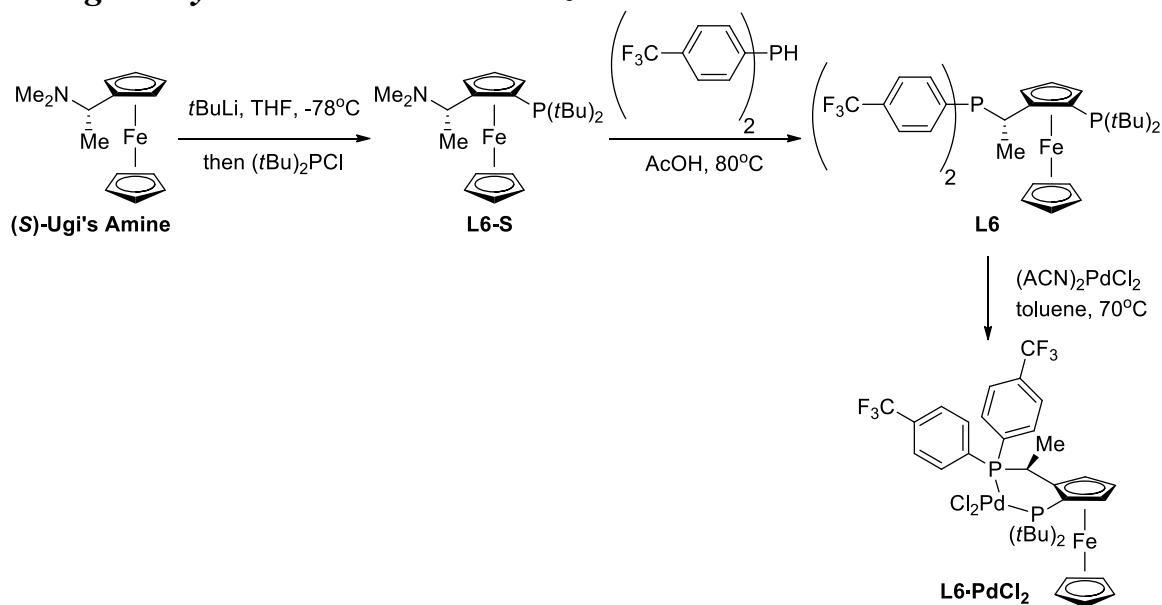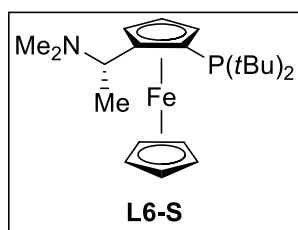

**Dimethyl{(S)-1-[(R)-2-(di-*tert*-butylphosphanyl)ferrocenyl]ethyl}amine (L6-S).** Prepared according to a literature precedent with slight modification.<sup>2</sup> To a 100-mL round-bottom flask equipped with a magnetic stir bar and reflux condenser was added (*S*)-Ugi's amine<sup>3</sup> (1.32 g, 5.12 mmol). The amine

was azeotroped with benzene (3 x 100 μL) and placed under N<sub>2</sub>. Et<sub>2</sub>O (33 mL) was added and the reaction was cooled to -78°C. *t*BuLi (3.60 mL, 6.14 mmol, 1.7M in pentanes) was cautiously

<sup>1</sup> Sun, C.; Potter, B.; Morken, J. P. *J. Am. Chem. Soc.* **2014**, *136*, 6534.

<sup>2</sup> Mejía, E.; Aardoom, R.; Togni, A. *Eur. J. Inorg. Chem.* **2012**, 5021.

<sup>3</sup> Gokel, G. W.; Ugi, I. K. *J. Chem. Ed.* **1972**, *49*, 294.

added dropwise. The reaction was stirred at  $-78^{\circ}\text{C}$  for 30 minutes and then warmed to room temperature for 1 hour. The reaction was re-cooled to  $-78^{\circ}\text{C}$  and di-*tert*-butylchlorophosphine (1.07 mL, 5.60 mmol) was added as a solution in  $\text{Et}_2\text{O}$  (1 mL) *via* syringe. The reaction stirred at  $-78^{\circ}\text{C}$  for 5 minutes before warming to room temperature. After stirring for 18 hours, the reaction was quenched with a saturated solution of  $\text{Na}_2\text{CO}_3$  (10 mL). The reaction was poured into a separatory funnel with  $\text{Et}_2\text{O}$  (30 mL). The layers were separated and the organic layer was successively washed with  $\text{H}_2\text{O}$  (20 mL) and brine (20 mL). The organic layer was dried over  $\text{Na}_2\text{SO}_{4(s)}$ , filtered and concentrated *in vacuo*. The crude material was purified by silica gel chromatography (5% ethyl acetate/hexanes to 30% ethyl acetate/hexanes) to afford the title compound as a red solid (1.36 g, 66% yield), which was stored in an Ar-filled drybox.  $R_f = 0.05$  in 50% ethyl acetate/hexanes on TLC.  $^1\text{H}$  NMR (500 MHz,  $\text{CDCl}_3$ )  $\delta$  4.54 (s, 1H), 4.38 (t,  $J = 2.0$  Hz, 1H), 4.26 (s, 1H), 4.16 (s, 5H), 3.60 (dq,  $J = 10.0, 6.0$  Hz, 1H), 2.19 (s, 6H), 1.50 (d,  $J = 12.0$  Hz, 9H), 1.46 (d,  $J = 7.0$  Hz, 3H), 0.92 (d,  $J = 11.5$  Hz).  $^{13}\text{C}$  NMR (150 MHz,  $\text{CDCl}_3$ )  $\delta$  101.60 (d,  $J = 25.5$  Hz), 77.21, 72.25 (d,  $J = 5.7$  Hz), 70.09, 68.39 (d,  $J = 4.5$  Hz), 68.20, 56.75 (d,  $J = 12.7$  Hz), 41.91, 33.26 (d,  $J = 20.8$  Hz), 31.84 (d,  $J = 18.5$  Hz), 30.87 (d,  $J = 15.1$  Hz), 30.39 (d,  $J = 13.9$  Hz), 16.85.  $^{31}\text{P}$  NMR (202 MHz,  $\text{CDCl}_3$ )  $\delta$  14.21. IR (neat)  $\nu_{\text{max}}$  3097 (w), 2970 (m), 2940 (m), 2888 (m), 2857 (s), 2813 (m), 2769 (m), 1473 (m), 1455 (s), 1384 (w), 1359 (s), 1262 (w), 1240 (w), 1194 (w), 1176 (w), 1154 (s), 1109 (s), 1089 (s), 1061 (m), 1041 (s), 1002 (s), 929 (s), 817 (s)  $\text{cm}^{-1}$ . HRMS (ESI+) calc. for  $\text{C}_{22}\text{H}_{37}\text{FeNP}$   $[\text{M}+\text{H}]^+$  402.2013, found 402.2008.  $[\alpha]_{\text{D}}^{20}$ : +260.2 ( $c = 0.722$ ,  $\text{CHCl}_3$ ,  $l = 50$  mm). Melting point:  $47\text{-}51^{\circ}\text{C}$ .

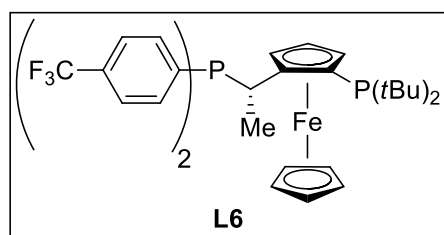

**(S)-1-[(R)-2-(Diterbutylphosphanyl)ferrocenyl]ethyldi[4-(trifluoromethyl)phenyl]phosphine (L6).** Prepared according to a literature precedent with slight modification.<sup>2</sup>

In an Ar-filled drybox, an oven-dried 2-dram vial with magnetic stir bar was charged with **L6-S** (330 mg, 0.82 mmol). The vial was sealed with a rubber septum and removed from the glove box. Freshly degassed (*via* constant bubbling with  $\text{N}_2$  for one hour prior to use) glacial AcOH (500  $\mu\text{L}$ ) was added under an atmosphere of  $\text{N}_2$ . The reaction was stirred and bis(4-trifluoromethylphenyl)phosphine (278 mg, 0.86 mmol) was added in a solution of glacial AcOH (500  $\mu\text{L}$ ) *via* syringe. The reaction was heated to  $80^{\circ}\text{C}$  for 18 hours. The reaction was cooled to room temperature and the solvent removed *in vacuo*. The mixture

was diluted with CH<sub>2</sub>Cl<sub>2</sub> (30 mL) and poured into a separatory funnel containing a saturated solution of Na<sub>2</sub>CO<sub>3</sub> (15 mL). The layers were separated and the organic layer was successively washed with H<sub>2</sub>O (20 mL) and brine (20 mL). The organic layer was dried over Na<sub>2</sub>SO<sub>4(s)</sub>, filtered and concentrated *in vacuo*. The crude material was purified by silica gel chromatography (hexanes to 3% ethyl acetate/hexanes) to afford the title compound as a red solid (306.2 mg, 55% yield, 95% purity), which was stored in an Ar-filled drybox. *R<sub>f</sub>* = 0.5 in 10% ethyl acetate/hexanes on TLC. <sup>1</sup>H NMR (600 MHz, CDCl<sub>3</sub>) δ 7.58-7.46 (m, 8H), 4.34 (m, 2H), 4.18 (s, 5H), 4.10 (s, minor conformer), 4.00 (s, 1H), 3.91 (s, minor conformer), 3.62 (m, 1H), 1.53 (d, *J* = 12.0 Hz, 9H), 1.44 (t, *J* = 7.8 Hz, 3H), 1.04 (d, *J* = 10.8 Hz, 9H). <sup>13</sup>C NMR (150 MHz, CDCl<sub>3</sub>) δ 143.50 (d, *J* = 22.0 Hz), 141.06 (d, *J* = 23.2 Hz), 136.07 (d, *J* = 20.8 Hz), 132.25 (d, *J* = 15.1 Hz), 131.52 (q, *J* = 32.4 Hz), 129.85 (q, *J* = 32.4 Hz), 125.03 (m), 124.85 (m), 98.87 (dd, *J* = 27.7, 18.4 Hz), 77.87 (dd, *J* = 36.9, 3.5 Hz), 72.67 (d, *J* = 5.9 Hz), 70.31, 68.85 (dd, *J* = 11.6, 4.7 Hz), 68.49, 33.46 (d, *J* = 20.8 Hz), 32.15 (d, *J* = 19.6 Hz), 31.03 (dd, *J* = 13.9, 2.4 Hz), 30.70 (d, *J* = 13.9 Hz), 29.38 (dd, *J* = 17.3, 12.7 Hz), 20.34 (dd, *J* = 4.7 Hz). <sup>31</sup>P NMR (242 MHz, CDCl<sub>3</sub>) δ 13.13 (d, *J* = 17.5 Hz), -0.32 (d, *J* = 16.3 Hz). <sup>19</sup>F NMR (470 MHz, CDCl<sub>3</sub>) δ -62.76, -62.82. IR (neat) *v*<sub>max</sub> 3092 (w), 2971 (w), 2942 (w), 2891 (w), 2861 (w), 1606 (m), 1395 (m), 1321 (s), 1164 (m), 1125 (s), 1107 (m), 1059 (s), 1015 (m), 908 (w), 826 (s), 733 (m), 699 (m) cm<sup>-1</sup>. HRMS (ESI+) calc. for C<sub>34</sub>H<sub>39</sub>F<sub>6</sub>FeP<sub>2</sub> [M+H]<sup>+</sup> 679.1781, found 679.1779. [α]<sub>D</sub><sup>20</sup>: +75.4 (*c* = 0.740, CHCl<sub>3</sub>, *l* = 50 mm). Melting point: 156-163 °C (decomposition).

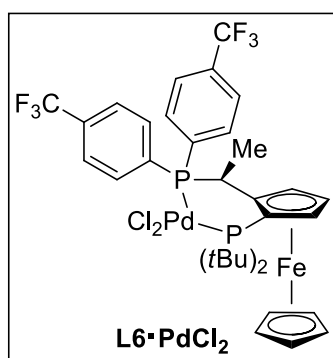

**L6-PdCl<sub>2</sub>.** In an Ar-filled glove box, an oven-dried 100-mL round bottom flask with magnetic stir bar was charged with (ACN)<sub>2</sub>PdCl<sub>2</sub> (290 mg, 1.12 mmol) and **L6** (758 mg, 1.12 mmol). The flask was removed from the drybox. Toluene (60 mL) was added and the reaction was heated to 70 °C for 3 hours under N<sub>2</sub>. The reaction was cooled to room temperature and the solvent removed *in vacuo*. CH<sub>2</sub>Cl<sub>2</sub> (10 mL) was added and the solution was filtered through a

plug of Celite. The solvent was removed *in vacuo* and the solid washed with Et<sub>2</sub>O (3 x 4 mL). The red solid was dried under vacuum for 12 hours to afford the title compound as a red solid (921 mg, 96% yield), which was stored under air in a dessicator. <sup>1</sup>H NMR (600 MHz, CDCl<sub>3</sub>) δ 8.26 (t, *J* = 9.0 Hz, 2H), 7.79 (dd, *J* = 11.4, 7.8 Hz, 2H), 7.67 (d, *J* = 7.2 Hz, 2H), 7.60 (d, *J* = 6.6

Hz, 2H), 4.99 (s, 1H), 4.73 (m, 2H), 4.23 (s, 5H), 3.61 (dq,  $J = 14.4, 7.2$  Hz, 1H), 2.10 (d,  $J = 15.6$  Hz, 9H), 1.39 (dd,  $J = 13.8, 7.2$  Hz, 3H), 1.10 (d,  $J = 14.4$  Hz, 9H).  $^{31}\text{P}$  NMR (242 MHz,  $\text{CDCl}_3$ )  $\delta$  53.75 (d,  $J = 4.6$  Hz), 43.91 (d,  $J = 4.6$  Hz).  $^{19}\text{F}$  NMR (470 MHz,  $\text{CDCl}_3$ )  $\delta$  -63.04, -63.37. IR (neat)  $\nu_{\text{max}}$  3080 (w), 2960 (w), 2898 (w), 2870 (w) 1608 (w), 1458 (w), 1396 (m), 1321 (s), 1281 (w), 1168 (m), 1128 (s), 1061 (s), 1015 (m), 909 (m), 830 (m), 729 (m)  $\text{cm}^{-1}$ . HRMS (ESI+) calc. for  $\text{C}_{34}\text{H}_{38}\text{ClF}_6\text{FeP}_2\text{Pd}$   $[\text{M}-\text{Cl}]^+$  819.0426, found 819.0432.  $[\alpha]_{\text{D}}^{20}$ : -401.3 (c = 1.03,  $\text{CHCl}_3$ ,  $l = 50$  mm). Melting point: 204-219 °C (decomposition).

### III. Ligand Optimization

JosiPhos ligands were either purchased according to the general information or prepared according to the procedures above (**Section II**).

**Method A.** An oven-dried 2-dram vial with magnetic stir bar was charged with (*S,R*)-JosiPhos (0.0055 mmol) and geminal bis(boronate) **1** (74.0 mg, 0.20 mmol) in an Ar-filled drybox. The vial was sealed with rubber septum and removed from the drybox.  $\text{Pd}(\text{OAc})_2$  in dioxane (500  $\mu\text{L}$ , 0.005 mmol, 0.01M) was added *via* syringe and the reaction stirred at room temperature under  $\text{N}_2$  for 1 hour. Then 1-bromo-2-methylprop-1-ene (10.2  $\mu\text{L}$ , 0.10 mmol) and 8M  $\text{KOH}_{(\text{aq})}$ <sup>4</sup> (56  $\mu\text{L}$ , 0.45 mmol) were added sequentially *via* syringe. The reaction was stirred under an atmosphere of  $\text{N}_2$  at room temperature for 18 hours. The reaction was diluted with  $\text{Et}_2\text{O}$  (2 mL) and filtered through a plug of Celite with additional  $\text{Et}_2\text{O}$  (5 mL). The filtrate was concentrated *in vacuo*. 1,1,2,2-Tetrachloroethane was added as an internal standard (~10 mg) and yield was determined by  $^1\text{H}$ -NMR analysis. THF (3 mL) was added to a scintillation vial containing the crude filtrate and equipped with a stir bar. The vial was sealed with a septum and an exit needle inserted. The reaction was cooled to 0°C, and  $\text{H}_2\text{O}_2$  (500  $\mu\text{L}$ , 30 wt% in  $\text{H}_2\text{O}$ ) and 3M NaOH (500  $\mu\text{L}$ ) were added sequentially *via* syringe. The reaction was warmed to room temperature and stirred for no less than 3 hours. The reaction was re-cooled to 0°C and quenched with a saturated solution of  $\text{Na}_2\text{S}_2\text{O}_3$  (200  $\mu\text{L}$ ). The reaction was warmed to room temperature, diluted with  $\text{Et}_2\text{O}$  (3 mL), and then filtered through a plug of silica gel with additional  $\text{Et}_2\text{O}$  (5 mL). The solvent was removed *in vacuo* and the crude mixture was purified by silica gel

---

<sup>4</sup>  $\text{KOH}_{(\text{aq})}$  was sparged with  $\text{N}_2$  for 30 min at room temperature before use.

chromatography (10% ethyl acetate/hexanes) to afford secondary allylic alcohol **3-OH**. The enantiomeric excess was determined by chiral SFC analysis (for full characterization see below).

**Table S1: Ligand Optimization**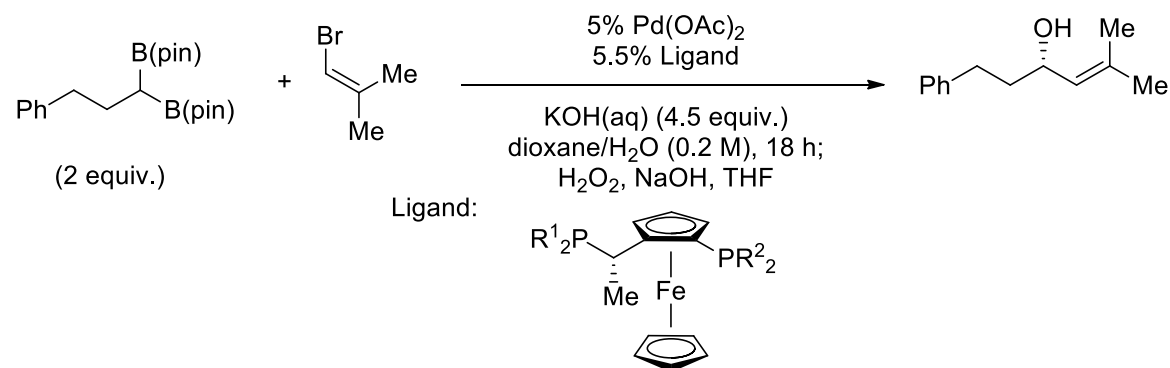

| entry | R <sub>1</sub>        | R <sub>2</sub>           | mono (%) <sup>a</sup> | bis (%) <sup>a</sup> | ee <sup>b</sup>   |
|-------|-----------------------|--------------------------|-----------------------|----------------------|-------------------|
| 1     | 3,5-Xylyl             | Ph                       | 22                    | 27                   | 13                |
| 2     | Cy                    | Ph                       | 21                    | 13                   | 7                 |
| 3     | Cy                    | 3,5-dimethyl-4-methoxyPh | 14                    | 20                   | 27                |
| 4     | Cy                    | Cy                       | 40                    | 5                    | 35                |
| 5     | <i>t</i> Bu           | Cy                       | 50                    | <2                   | 37                |
| 6     | Ph                    | Cy                       | 50                    | 15                   | 30                |
| 7     | Ph                    | <i>i</i> Pr              | 40                    | <2                   | 56                |
| 8     | Ph                    | 1-Adamantyl              | 24                    | <2                   | 23                |
| 9     | Ph                    | <i>t</i> Bu              | 60                    | <2                   | 81                |
| 10    | 2-MethylPh            | <i>t</i> Bu              | 14                    | <2                   | 26                |
| 11    | 4-FluoroPh            | <i>t</i> Bu              | 44                    | <5                   | 80                |
| 12    | 4-MethoxyPh           | <i>t</i> Bu              | 16                    | 10                   | 70                |
| 13    | 3,5-DimethoxyPh       | <i>t</i> Bu              | 45                    | <2                   | 57                |
| 14    | 4-MethylPh            | <i>t</i> Bu              | 22                    | <5                   | 64                |
| 15    | 3-MethylPh            | <i>t</i> Bu              | 48                    | 10                   | 66                |
| 16    | 3,5-Xylyl             | <i>t</i> Bu              | 29                    | 22                   | <5                |
| 17    | 2-Furyl               | <i>t</i> Bu              | 85                    | <5                   | 52                |
| 18    | 2-Naphthyl            | <i>t</i> Bu              | 27                    | 10                   | 40                |
| 19    | Benzo[b]phosphinodole | <i>t</i> Bu              | 20                    | 23                   | 9                 |
| 20    | <i>t</i> Bu           | <i>t</i> Bu              | 25                    | <2                   | 14                |
| 21    | Cy                    | <i>t</i> Bu              | <10                   | <2                   | n.d. <sup>d</sup> |
| 22    | 4-CF <sub>3</sub> Ph  | <i>t</i> Bu              | 95                    | <2                   | 82                |
| 23    | 2-CF <sub>3</sub> Ph  | <i>t</i> Bu              | 89                    | <2                   | 50                |
| 24    | 3,4,5-TrifluoroPh     | <i>t</i> Bu              | 97                    | <2                   | 70                |

<sup>a</sup>Yield was determined by <sup>1</sup>H-NMR in comparison to 1,1,2,2-tetrachloroethane as an internal standard. <sup>c</sup>Enantiomeric excess (*ee*) determined by chiral SFC analysis of corresponding alcohol. <sup>d</sup>Not Determined.

#### IV. Synthesis and Characterization of Geminal bis(Boronates)

Geminal bis(boronates) were prepared according to literature procedures.<sup>1,5</sup>

**Method B.** Prepared according to a literature precedent with slight modification.<sup>6</sup> In an Ar-filled drybox, an oven-dried 50-mL round bottom flask with magnetic stir bar was charged with lithium 2,2,6,6-tetramethylpiperidide (440 mg, 3.0 mmol). The flask was sealed with a rubber septum, removed from the drybox. THF (10 mL) was added and the reaction was cooled to 0 °C. A solution of bis(4,4,5,5-tetramethyl-1,3,2-dioxaborolan-2-yl)methane<sup>1,5</sup> (804 mg, 3.0 mmol) in THF (5 mL) was added *via* syringe and the mixture was allowed to stir at 0 °C for 5 minutes. Then a solution of the corresponding alkyl bromide (3.3 mmol) in THF (5 mL) was added. The reaction mixture was allowed to warm to room temperature and stir for 2 hours. The reaction was diluted with Et<sub>2</sub>O (10 mL) and filtered through Celite with Et<sub>2</sub>O (10 mL). The solvent was removed *in vacuo* and the crude mixture was purified by silica gel chromatography.

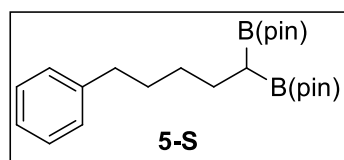

**2,2'-(4-Phenylpentane-1,1-diyl)bis(4,4,5,5-tetramethyl-1,3,2-dioxaborolane) (5-S).** Prepared according to *Method B* with (4-bromobutyl)benzene<sup>7</sup> as the electrophile. The crude mixture was purified by silica gel chromatography (5% ethyl acetate/hexanes,

stain in CAM) to afford the title compound as a white solid (43%). *R<sub>f</sub>* = 0.5 in 10% ethyl acetate/hexanes on TLC. <sup>1</sup>H NMR (500 MHz, CDCl<sub>3</sub>) δ 7.27-7.21 (m, 2H), 7.18-7.12 (m, 3H), 2.59 (t, *J* = 7.0 Hz, 2H), 1.59 (m, 4H), 1.32 (m, 2H), 1.22 (s, 12H), 1.20 (s, 12H), 0.72 (t, *J* = 7.5 Hz, 1H). <sup>13</sup>C NMR (125 MHz, CDCl<sub>3</sub>) δ 1.43.13, 128.59, 128.27, 125.56, 83.03, 35.94, 32.26, 31.50, 25.70, 24.96, 24.66. <sup>11</sup>B NMR (160 MHz, CDCl<sub>3</sub>) δ 33.85. IR (neat) *v*<sub>max</sub> 3085 (w), 3061 (w), 3026 (w), 2976 (s), 2928 (m), 2856 (m), 1584 (w), 1454 (m), 1354 (s), 1308 (s), 1265 (s), 1214 (m), 1137 (s), 969 (s), 849 (s), 745 (m), 698 (s) cm<sup>-1</sup>. HRMS (ESI+) calc. for C<sub>23</sub>H<sub>39</sub>B<sub>2</sub>O<sub>4</sub> [M+H]<sup>+</sup> 401.3034, found 401.3014. Melting point: 41-42 °C.

<sup>5</sup> Hong, K.; Liu, X.; Morken, J.P. *J. Am. Chem. Soc.* **2014**, *136*, 10581.

<sup>6</sup> Matteson, D. S.; Moody, R. J. *Organometallics*, **1982**, *1*, 20.

<sup>7</sup> Hardouin, C.; Kelso, M. J.; Romero, F. A.; Rayl, T. J.; Leung, D.; Hwang, I.; Cravatt, B. F.; Boger, D. L. *J. of Med. Chem.*, **2007**, *50*, 3359.



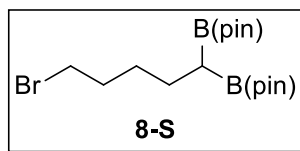

**2,2'-(5-Bromopentane-1,1-diyl)bis(4,4,5,5-tetramethyl-1,3,2-dioxaborolane) (8-S).** Prepared according to *Method B* with 1,4-dibromobutane as the electrophile. The crude mixture was purified by silica gel chromatography (5% ethyl acetate/hexanes, stain in CAM) to afford the title compound as a white solid (52%).  $R_f = 0.5$  in 10% ethyl acetate/hexanes on TLC.  $^1\text{H}$  NMR (500 MHz,  $\text{CDCl}_3$ )  $\delta$  3.39 (t,  $J = 7.0$  Hz, 2H), 1.84 (p,  $J = 7.0$  Hz, 2H), 1.57 (q,  $J = 8.0$  Hz, 2H), 1.42 (m, 2H), 1.23 (s, 12H), 1.22 (s, 12H), 0.72 (t,  $J = 8.0$  Hz, 1H).  $^{13}\text{C}$  NMR (125 MHz,  $\text{CDCl}_3$ )  $\delta$  83.13, 34.21, 33.03, 31.08, 25.01, 24.99, 24.66.  $^{11}\text{B}$  NMR (160 MHz,  $\text{CDCl}_3$ )  $\delta$  33.81. IR (neat)  $\nu_{\text{max}}$  2976 (s), 2930 (m), 2861 (w), 1459 (w), 1354 (s), 1306 (s), 1245 (s), 1213 (m), 1164 (s), 1004 (w), 968 (s), 905 (w), 849 (s), 734 (w)  $\text{cm}^{-1}$ . HRMS (ESI+) calc. for  $\text{C}_{17}\text{H}_{37}\text{B}_2\text{BrNO}_4$   $[\text{M}+\text{NH}_4]^+$  420.2092, found 402.2100. Melting point: 48-50  $^\circ\text{C}$ .

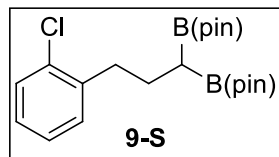

**2,2'-(3-(2-Chlorophenyl)propane-1,1-diyl)bis(4,4,5,5-tetramethyl-1,3,2-dioxaborolane) (9-S).** Prepared according to *Method A* with 2-chlorophenethylbromide as the electrophile. The crude mixture was purified by silica gel chromatography (10% ethyl acetate/hexanes, stain in CAM) to afford the title compound as a white solid (75%).  $R_f = 0.3$  in 10% ethyl acetate/hexanes on TLC.  $^1\text{H}$  NMR (500 MHz,  $\text{CDCl}_3$ )  $\delta$  7.29 (dd,  $J = 7.5, 1.5$  Hz, 1H), 7.22 (dd,  $J = 8.0, 2.0$  Hz, 1H), 7.14 (dt,  $J = 7.0, 1.5$  Hz, 1H), 7.08 (dt,  $J = 8.0, 2.0$  Hz, 1H), 2.73-2.79 (m, 2H), 1.87 – 1.82 (m, 2H), 1.24 (s, 12H), 1.23 (s, 12H), 0.83 (t,  $J = 8.0$  Hz, 1H).  $^{13}\text{C}$  NMR (125 MHz,  $\text{CDCl}_3$ )  $\delta$  140.54, 134.01, 130.71, 129.35, 127.07, 126.64, 83.15, 36.18, 26.25, 25.05, 24.65.  $^{11}\text{B}$  NMR (160 MHz,  $\text{CDCl}_3$ )  $\delta$  33.82. IR (neat)  $\nu_{\text{max}}$  2977 (w), 2929 (w), 2865 (w), 1474 (w), 1356 (m), 1310 (s), 1258 (m), 1215 (s), 1137 (s), 1105 (w), 970 (m), 846 (m), 755 (m), 679 (w)  $\text{cm}^{-1}$ . HRMS (ESI+) calc. for  $\text{C}_{21}\text{H}_{34}\text{B}_2\text{ClO}_4$   $[\text{M}+\text{H}]^+$  407.2332, found 407.2340. Melting point: 87-90  $^\circ\text{C}$ .

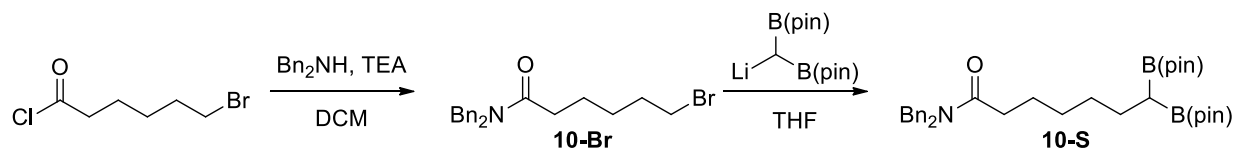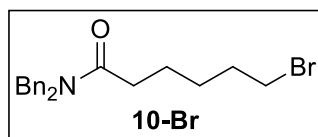

**N,N-Dibenzyl-6-bromo-hexanamide (10-Br).** To an oven-dried, 100-

mL round-bottom flask equipped with a magnetic stir bar under an atmosphere of N<sub>2</sub>, was added CH<sub>2</sub>Cl<sub>2</sub> (18 mL), triethylamine (1.2 mL, 8.4 mmol) and dibenzylamine (1.6 mL, 8.4 mmol) *via* syringe. The reaction was stirred and cooled to 0°C. 6-Bromohexanoyl chloride (1.1 mL, 7.0 mmol) was added dropwise *via* syringe over a period of 10 minutes. The reaction was warmed to room temperature and stirred for 4 hours under N<sub>2</sub>. The reaction was quenched by addition of H<sub>2</sub>O (4 mL) and poured into a separatory funnel containing 3M NaOH (15 mL). The layers were separated and the aqueous layer was extracted with CH<sub>2</sub>Cl<sub>2</sub> (2 x 15 mL). The organic layers were combined, dried over Na<sub>2</sub>SO<sub>4(s)</sub>, filtered, and concentrated *in vacuo*. The crude mixture was purified by silica gel chromatography (25% ethyl acetate/hexanes, stain in CAM) to afford the title compound as a yellow oil (2.3g, 88%). R<sub>f</sub> = 0.2 in 20% ethyl acetate/hexanes on TLC.

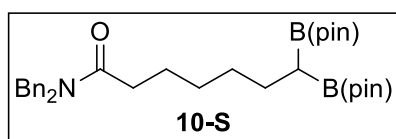

***N,N*-Dibenzyl-7,7-bis(4,4,5,5-tetramethyl-1,3,2-dioxaborolan-2-yl)heptanamide (10-S).** Prepared according to *Method B* with *N,N*-dibenzyl-6-bromohexanamide as the

electrophile. The crude mixture was purified by silica gel chromatography (25% ethyl acetate/hexanes, stain in CAM) to afford the title compound as a yellow oil (55%). R<sub>f</sub> = 0.2 in 20% ethyl acetate/hexanes on TLC. <sup>1</sup>H NMR (500 MHz, CDCl<sub>3</sub>) δ 7.39-7.24 (m, 8H), 7.20 (d, *J* = 7.5 Hz, 2H), 7.14 (d, *J* = 7.0 Hz, 2H), 4.59 (s, 2H), 4.43 (s, 2H), 2.39 (t, *J* = 8.0 Hz, 2H), 1.70 (p, *J* = 7.5 Hz, 2H), 1.53 (q, *J* = 7.0 Hz, 2H), 1.35-1.22 (m, 4H), 1.21 (s, 6H), 1.20 (s, 6H), 0.69 (t, *J* = 7.5 Hz, 1H). <sup>13</sup>C NMR (125 MHz, CDCl<sub>3</sub>) δ 173.87, 137.68, 136.77, 129.00, 128.64, 128.35, 127.63, 127.37, 126.49, 82.95, 49.99, 48.06, 33.47, 32.40, 29.63, 25.66, 25.57, 24.94, 24.60. <sup>11</sup>B NMR (160 MHz, CDCl<sub>3</sub>) δ 33.71. IR (neat) ν<sub>max</sub> 3029 (w), 2978 (m), 2929 (w), 2858 (w), 1641 (m), 1452 (m), 1358 (m), 1311 (s), 1267 (m), 1213 (m), 1137 (s), 969 (m), 908 (s), 849 (m), 726 (s), 698 (m) cm<sup>-1</sup>. HRMS (ESI<sup>+</sup>) calc. for C<sub>33</sub>H<sub>50</sub>B<sub>2</sub>NO<sub>5</sub> [M+H]<sup>+</sup> 562.3875, found 562.3861.

## V. Synthesis and Characterization of Vinyl Bromides

**Method C.** Prepared according to a literature precedent with slight modification.<sup>8</sup> In an Ar-filled drybox, an oven-dried 100-mL round bottom flask was charged with Cp<sub>2</sub>ZrCl<sub>2</sub> (640 mg, 2.2 mmol). The flask was removed from the drybox and CH<sub>2</sub>Cl<sub>2</sub> (15 mL) was added followed cautiously by trimethylaluminium (2.9 mL, 30 mmol) *via* syringe. The reaction was cooled to -23°C and water (270 μL, 15 mmol) was added dropwise with vigorous stirring. After stirring for 10 minutes, the corresponding alkyne (10 mmol) was added in a solution of CH<sub>2</sub>Cl<sub>2</sub> (5 mL). The reaction was stirred for an additional 10 minutes at -23°C before adding NBS (5.3 g, 30 mmol) as a solid. The reaction was allowed to warm to room temperature and stirred under N<sub>2</sub> for 12 hours. The reaction was cooled to 0°C and carefully quenched with a saturated solution of K<sub>2</sub>CO<sub>3</sub> (3 mL). After stirring for 10 minutes, excess Na<sub>2</sub>SO<sub>4(s)</sub> was added. The mixture was filtered through a short pad of silica and concentrated *in vacuo*. The crude mixture was purified by silica gel chromatography.

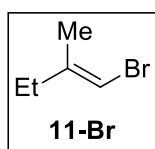

**(E)-1-Bromo-2-methylbut-1-ene (11-Br).** Prepared according to a literature precedent with slight modification.<sup>7</sup> In an Ar-filled drybox, to an oven-dried 2-neck 100-mL round bottom flask equipped with a magnetic stirbar was charged with Cp<sub>2</sub>ZrCl<sub>2</sub> (643 mg, 2.2 mmol). The flask was sealed with rubber septa and removed from the drybox. Under a constant pressure of N<sub>2</sub>, one septum was replaced a Dewar condenser. CH<sub>2</sub>Cl<sub>2</sub> (15 mL) was added to the reaction vessel followed cautiously by trimethylaluminium (2.88 mL, 30 mmol) *via* syringe. The reaction was cooled to -23°C and water (270 μL, 15 mmol) was added dropwise with vigorous stirring. After stirring for 10 minutes, the Dewar condenser was cooled to -78 °C and butyne (0.9 mL, 10 mmol) was added dropwise *via* the condenser. The reaction was stirred for an additional 10 minutes at -23°C before adding NBS (5.3 g, 30 mmol) as a solid. The reaction was allowed to warm to room temperature and stirred under N<sub>2</sub> for 12 hours. The reaction was cooled to 0°C and carefully quenched with a saturated solution of K<sub>2</sub>CO<sub>3</sub> (3 mL). After stirring for 10 minutes, excess Na<sub>2</sub>SO<sub>4(s)</sub> was added. The mixture was filtered through a short pad of silica and concentrated *in vacuo*. The crude mixture was purified on silica gel

<sup>8</sup> Lim, S.; Wipf, P. *Angew. Chem. Int. Ed. Engl.* **1993**, *32*, 1068.

(pentane, stain in CAM) to afford a clear, colorless oil (44% yield).  $R_f = 0.9$  in pentanes on TLC. The spectral data matched those reported in the literature.<sup>9</sup>

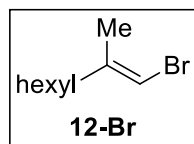

**(E)-1-Bromo-2-methyloct-1-ene (12-Br).** Prepared according to *Method C*.

The crude reaction mixture was purified by silica gel chromatography (pentanes, stain in CAM) to afford a clear, colorless oil (64% yield).  $R_f = 0.9$  in pentanes on TLC. <sup>1</sup>H NMR (500 MHz, CDCl<sub>3</sub>)  $\delta$  5.88 (s, 1H), 2.09 (t,  $J = 7.5$  Hz, 2H), 1.78 (s, 3H), 1.42 (p,  $J = 7.0$  Hz, 2H), 1.36-1.21 (m, 6H), 0.89 (t,  $J = 7.5$  Hz, 3H). <sup>13</sup>C NMR (125 MHz, CDCl<sub>3</sub>)  $\delta$  142.18, 100.98, 38.48, 31.77, 28.89, 27.62, 22.72, 19.16, 14.20. IR (neat)  $\nu_{\max}$  3070 (w), 2955 (m), 2926 (s), 2856 (m), 1632 (w), 1458 (m), 1377 (m), 1283 (m), 1160 (m), 771 (m), 712 (s) cm<sup>-1</sup>. HRMS (ESI+) calc. for C<sub>9</sub>H<sub>18</sub>Br [M+H]<sup>+</sup> 205.0592, found 205.0595.

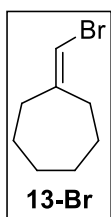

**(Bromomethylene)cycloheptane (13-Br).** Prepared according to a literature

precedent with slight modification.<sup>10</sup> A 50-mL round-bottom flask equipped with a magnetic stir bar was charged with (bromomethyl)triphenylphosphonium bromide<sup>11</sup> (1.13 g, 2.60 mmol). The flask was purged with N<sub>2</sub> for 5 minutes and THF (7 mL) was added. The reaction was cooled to -78°C and a solution of KO<sup>t</sup>Bu (292 mg, 2.60 mmol) in THF (3 mL) was added dropwise. The reaction was stirred at -78°C for 5 minutes before warming to room temperature over 30 minutes. Cycloheptanone (236  $\mu$ L, 2.00 mmol) was added neat and the reaction was stirred under N<sub>2</sub> at room temperature for 16 hours. The reaction was diluted with Et<sub>2</sub>O (10 mL) and quenched with H<sub>2</sub>O (10 mL). The mixture was added to a separatory funnel and the layers separated. The aqueous layer was then extracted with Et<sub>2</sub>O (3 x 10 mL). The organic layers were combined, dried over Na<sub>2</sub>SO<sub>4(s)</sub>, filtered, and concentrated *in vacuo*. The crude mixture was purified by silica gel chromatography (pentanes, stain in CAM) to afford a clear, colorless oil (64% yield).  $R_f = 0.9$  in pentanes on TLC. <sup>1</sup>H NMR (500 MHz, CDCl<sub>3</sub>)  $\delta$  5.92 (s, 1H), 2.37 (t,  $J = 6.0$  Hz, 2H), 2.31 (t,  $J = 6.0$  Hz, 2H), 1.69-1.47 (m, 8H). <sup>13</sup>C NMR (125 MHz, CDCl<sub>3</sub>)  $\delta$  147.47, 101.14, 36.50, 33.40, 30.11, 29.31, 28.85, 26.18. IR (neat)  $\nu_{\max}$  3070 (w), 2921

<sup>9</sup> Normant, J. F.; Chuit, C.; Cahiez, G.; Villiera, J. *Synthesis*, **1974**, 803.

<sup>10</sup> Harrowven, D.C.; Pascoe, D.D.; Guy, I.L. *Angew. Chem. Int. Ed.* **2007**, *46*, 425.

<sup>11</sup> Vassilikogiannakis, G.; Hatzimarinaki, M.; Orfanopoulos, M. *J. Org. Chem.* **2000**, *65*, 8180.

(s), 2850 (m), 1614 (w), 1441 (m), 1291 (m), 1159 (w), 763 (s), 729 (m), 682 (m)  $\text{cm}^{-1}$ . HRMS (ESI+) calc. for  $\text{C}_8\text{H}_{14}\text{Br}$   $[\text{M}+\text{H}]^+$  189.0279, found 189.0273.

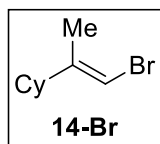

**(E)-1-Bromoprop-1-en-2-yl)cyclohexane (14-Br).** Prepared according to *Method C*. The crude reaction mixture was purified by silica gel chromatography (pentanes, stain in CAM) to afford a clear, colorless oil (47% yield).  $R_f = 0.9$  in pentanes on TLC.  $^1\text{H}$  NMR (500 MHz,  $\text{CDCl}_3$ )  $\delta$  5.92 (s, 1H), 2.02 (m, 1H), 1.8-1.65 (m, 7H), 1.33-1.09 (m, 6H).  $^{13}\text{C}$  NMR (125 MHz,  $\text{CDCl}_3$ )  $\delta$  146.92, 101.12, 47.07, 31.71, 26.60, 26.27, 17.75. IR (neat)  $\nu_{\text{max}}$  3069 (w), 2924 (s), 2852 (s), 1624 (m), 1447 (s), 1377 (m), 1306 (m), 1280 (m), 1165 (m), 1033 (m), 898 (m), 773 (s), 712 (s)  $\text{cm}^{-1}$ . HRMS (ESI+) calc. for  $\text{C}_9\text{H}_{16}\text{Br}$   $[\text{M}+\text{H}]^+$  203.0435, found 203.0435.

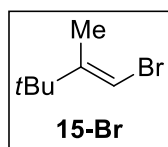

**(E)-1-Bromo-2,3,3-trimethylbut-1-ene (15-Br).** Prepared according to *Method C*. The crude reaction mixture was purified by silica gel chromatography (pentanes, stain in CAM) to afford a clear, colorless oil (25% yield).  $R_f = 0.9$  in pentanes on TLC. The spectral data matched those reported in the literature.<sup>12</sup>

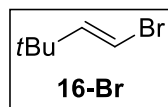

**(E)-1-Bromo-3,3-dimethylbut-1-ene (16-Br).** Prepared according to a literature precedent with slight modification.<sup>13</sup> To an oven-dried 25 mL round-bottom flask equipped with a magnetic stir bar under  $\text{N}_2$  was added 3,3-dimethylbut-1-yne (370  $\mu\text{L}$ , 3.0 mmol). DIBAL-H (3.3 mL, 3.3 mmol, 1.0 M in hexanes) was added *via* syringe and the reaction was stirred for 15 minutes at room temperature before heating to  $50^\circ\text{C}$  for 5 hours. The reaction was cooled to room temperature and  $\text{Et}_2\text{O}$  (2 mL) was added. The reaction was further cooled to  $-78^\circ\text{C}$  and NBS (640 mg, 3.6 mmol) was added as a solid. Upon warming to room temperature, the reaction was stirred for 16 hours. To quench, the reaction was poured into a mixture of 6M HCl (10 mL), pentanes (20 mL), and ice. The layers were separated in a separatory funnel, and the aqueous layer was extracted with pentanes (3 x 20 mL). The organic layers were combined and washed successively with 1M NaOH (10 mL) and a saturated solution of  $\text{Na}_2\text{S}_2\text{O}_3$  (10 mL). The organic layer was dried over  $\text{Na}_2\text{SO}_{4(s)}$ , filtered, and concentrated *in vacuo*. The crude

<sup>12</sup> Lipshutz, B.H.; Butler, T.; Lower, A. *J. Am. Chem. Soc.* **2006**, *128*, 15396.

<sup>13</sup> Hanessian, S.; Tehim, A.; Chen, P. *J. Org. Chem.* **1993**, *58*, 7768

mixture was purified by silica gel chromatography (pentanes, stain in  $\text{KMnO}_4$ ) to afford a clear, colorless oil (160 mg, 33% yield).  $R_f = 0.9$  in pentanes on TLC.  $^1\text{H}$  NMR (500 MHz,  $\text{CDCl}_3$ )  $\delta$  6.22 (d,  $J = 14.0$  Hz, 1H), 5.98 (d,  $J = 13.5$  Hz, 1H), 1.04 (s, 9H).  $^{13}\text{C}$  NMR (125 MHz,  $\text{CDCl}_3$ )  $\delta$  148.64, 102.02, 35.83, 29.133. IR (neat)  $\nu_{\text{max}}$  3085 (w), 2961 (m), 2932 (w), 2905 (w), 2868 (w), 1614 (w), 1463 (w), 1364 (m), 1263 (m), 945 (m), 906 (s), 774 (m)  $\text{cm}^{-1}$ . HRMS (ESI+) calc. for  $\text{C}_6\text{H}_{12}\text{Br}[\text{M}+\text{H}]^+$  163.0122, found 163.0125.

## VI. Procedures for Enantiotopic-Group-Selective Suzuki Coupling

**Method D.** A 2-dram vial with magnetic stir bar was charged with **L6PdCl<sub>2</sub>** (0.9 mg, 0.0010 mmol) and 1,1-diborylalkane (0.15 mmol). The vial was sealed with rubber septum, and purged with  $\text{N}_2$  for 10 minutes. Dioxane (250  $\mu\text{L}$ ) was added and the reaction stirred for 5 minutes. Then a solution of vinyl bromide in dioxane (250  $\mu\text{L}$ , 0.10 mmol, 0.4M) and 8M  $\text{KOH}_{(\text{aq})}$ <sup>4</sup> (56  $\mu\text{L}$ , 0.45 mmol) were added sequentially *via* syringe. The reaction was stirred under an atmosphere of  $\text{N}_2$  at room temperature for 18 hours. The reaction was diluted with  $\text{Et}_2\text{O}$  (2 mL) and filtered through a plug of Celite with additional  $\text{Et}_2\text{O}$  (5 mL). The filtrate was concentrated *in vacuo* and purified by silica gel chromatography to afford the desired compound. The enantiomeric ratio was determined for the alcohol obtained from subjecting the purified allyl boronate product to either hydrogen peroxide oxidation (*Method E*) or benzaldehyde allylation (*Method F*).

**Method E, oxidation to secondary allylic alcohol.** THF (3 mL) was added to the purified allylic boronate in a scintillation vial equipped with a stir bar. The vial was sealed with a septum and an exit needle inserted. The reaction was cooled to  $0^\circ\text{C}$ , and  $\text{H}_2\text{O}_2$  (500  $\mu\text{L}$ , 30 wt% in  $\text{H}_2\text{O}$ ) and 3M NaOH (500  $\mu\text{L}$ ) were added sequentially *via* syringe. The reaction was warmed to room temperature and stirred for no less than 3 hours. The reaction was re-cooled to  $0^\circ\text{C}$  and quenched with a saturated solution of  $\text{Na}_2\text{S}_2\text{O}_3$  (200  $\mu\text{L}$ ). The reaction was warmed to room temperature, diluted with  $\text{Et}_2\text{O}$  (3 mL), and then filtered through a plug of silica gel with additional  $\text{Et}_2\text{O}$  (5 mL). The solvent was removed *in vacuo* and the crude mixture was purified by silica gel chromatography to afford the corresponding secondary allylic alcohol.

**Method F, allylboration with benzaldehyde.** Toluene (500  $\mu\text{L}$ ) was added to the purified allylic boronate in a 2-dram vial equipped with a stir bar under  $\text{N}_2$ . The reaction was stirred and benzaldehyde (50  $\mu\text{L}$ , 0.5 mmol) was added. The reaction was heated to  $60^\circ\text{C}$  for 24 hours under  $\text{N}_2$ . Upon cooling to room temperature, the reaction was diluted with  $\text{Et}_2\text{O}$  (3 mL) and filtered

through a short pad of Celite with additional Et<sub>2</sub>O (5 mL). The solvent was removed *in vacuo* and the crude mixture was purified by silica gel chromatography to afford the corresponding secondary homoallylic alcohol.

## VII. Characterization of Reaction Products and Analysis of Stereochemistry

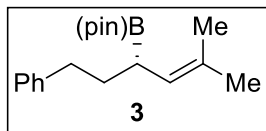

**(S)-4,4,5,5-Tetramethyl-2-(5-methyl-1-phenylhex-4-en-3-yl)-1,3,2-dioxaborolane (3).** The reaction was performed according to the *Representative Procedure (Method D)*. The crude mixture was purified by

silica gel chromatography (20% CH<sub>2</sub>Cl<sub>2</sub>/hexanes, stain in CAM) to afford a clear, colorless oil (27.9mg, 93% yield). *R<sub>f</sub>* = 0.6 in 50% CH<sub>2</sub>Cl<sub>2</sub>/hexanes on TLC. <sup>1</sup>H NMR (500 MHz, CDCl<sub>3</sub>) δ 7.27-7.24 (m, 2H), 7.17-7.13 (m, 3H), 5.09 (d, *J* = 9.5 Hz, 1H), 2.64 (ddd, *J* = 13.5, 10.5, 5.5 Hz, 1H), 2.53 (ddd, *J* = 13.0, 10.5, 6.0 Hz, 1H), 1.99 (q, *J* = 8.5 Hz, 1H), 1.83 (ddt, *J* = 13.0, 10.0, 6.0 Hz, 1H), 1.72 (s, 3H), 1.67 (m, 1H), 1.59 (s, 3H), 1.23 (s, 6H), 1.22 (s, 6H). <sup>13</sup>C NMR (125 MHz, CDCl<sub>3</sub>) δ 143.06, 131.31, 128.63, 128.32, 125.65, 125.06, 83.09, 35.64, 33.71, 24.92, 24.69, 18.4. <sup>11</sup>B NMR (160 MHz, CDCl<sub>3</sub>) δ 33.06. IR (neat) *v*<sub>max</sub> 3084 (w), 3062 (w), 3026 (m), 2976 (s), 2924 (s), 2856 (m), 1603 (s), 1495 (m), 1453 (m), 1369 (s), 1315 (s), 1269 (m), 1214 (m), 1141 (s), 1105 (m), 967 (s), 838 (m), 698 (s) cm<sup>-1</sup>. HRMS (ESI+) calc. for C<sub>19</sub>H<sub>30</sub>BO<sub>2</sub> [M+H]<sup>+</sup> 301.2339, found 301.2335. [α]<sub>D</sub><sup>20</sup>: +1.73 (c = 0.925, CHCl<sub>3</sub>, *l* = 50 mm).

### Gram Scale Procedure

A 50-mL round bottom flask with magnetic stir bar was charged with L6·PdCl<sub>2</sub> (42.8 mg, 0.050 mmol) and geminal bis(boronate) **1** (2.79 g, 7.5 mmol). The flask was sealed with rubber septum, and purged with N<sub>2</sub> for 20 minutes. Dioxane (25 mL) was added and the reaction stirred for 5 minutes. 1-Bromo-2-methylprop-1-ene (512 μL, 5.0 mmol)<sup>14</sup> and 8M KOH<sub>(aq)</sub><sup>4</sup> (2.80 mL, 22.5 mmol) were added sequentially *via* syringe. The reaction was stirred under an atmosphere of N<sub>2</sub> at room temperature for 18 hours. The reaction was diluted with Et<sub>2</sub>O (15 mL) and poured into a separatory funnel with Et<sub>2</sub>O (10 mL). The layers were separated and the aqueous layer was extracted with Et<sub>2</sub>O (2 x 20 mL). The organic layers were combined, dried over Na<sub>2</sub>SO<sub>4(s)</sub>, filtered, and concentrated *in vacuo*. The crude material was purified by silica gel

<sup>14</sup>1-Bromo-2-methylprop-1-ene was sparged with N<sub>2</sub> for 30 min at room temperature before use.

chromatography (20% CH<sub>2</sub>Cl<sub>2</sub>/hexanes, stain in CAM) to afford the title compound as a yellow oil (1.06 g, 71% yield) which co-eluted with protodeboration of the starting material (380 mg).

The spectral data matched those above.

### Analysis of Stereochemistry:

The enantiomeric ratio was determined by chiral SFC analysis of the corresponding secondary allylic alcohol. The racemic alcohol was prepared analogously with racemic **L4** and the corresponding geminal bis(boronate) according to *Method A*.

*Chiral SFC (OD-H, Chiraldex, 3 mL/min, 7% <sup>i</sup>PrOH, 100 bar, 35 °C)-analysis of the reaction product.*

#### Racemic

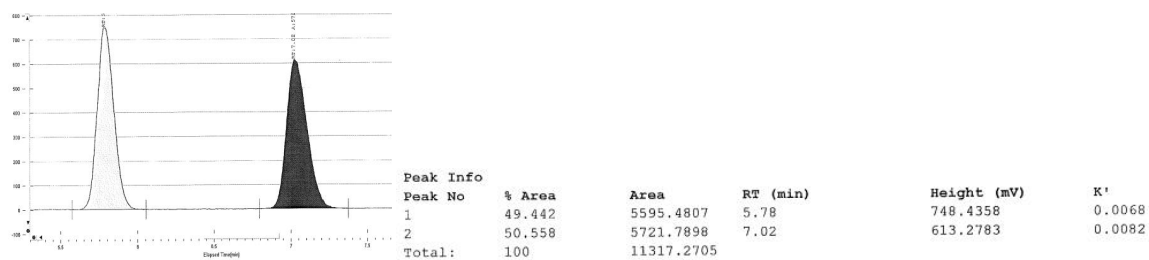

#### Reaction product

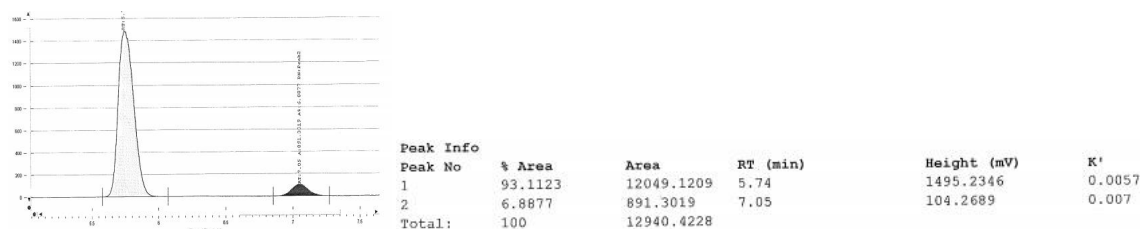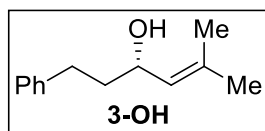

**(S)-5-Methyl-1-phenylhex-4-en-3-ol (3-OH).** The reaction was performed according to the *Representative Procedure (Method E)*. The crude mixture was purified by silica gel chromatography (8% ethyl acetate/pentanes, stain in CAM) to afford a clear, colorless oil.  $R_f = 0.4$  in 7/2/1 hexanes/CH<sub>2</sub>Cl<sub>2</sub>/ethyl acetate on TLC. <sup>1</sup>H NMR (500 MHz, CDCl<sub>3</sub>) δ 7.29-7.26 (m, 2H), 7.20-7.17 (m, 3H), 5.22 (d,  $J = 9.0$  Hz, 1H), 4.37 (q,  $J = 9.0$  Hz, 1H), 2.67 (m, 2H), 1.92 (ddt,  $J = 13.5, 9.5, 6.5$  Hz, 1H), 1.76 (ddt,  $J = 13.0, 10.0, 6.0$  Hz, 1H), 1.74 (s, 3H), 1.66 (s, 3H), 1.34 (s, 1H). <sup>13</sup>C NMR (125 MHz, CDCl<sub>3</sub>) δ 142.21, 135.75, 128.53, 128.47, 128.06, 125.89, 68.31, 39.30, 31.95, 25.94, 18.41. IR (neat)  $\nu_{max}$  3359 (br), 3061 (w), 3026 (w), 2968 (w), 2926 (s),



2856 (m), 1495 (m), 1453 (s), 1376 (m), 1042 (s), 1006 (m), 746 (m), 698 (s)  $\text{cm}^{-1}$ . HRMS (ESI+) calc. for  $\text{C}_{13}\text{H}_{17}$   $[\text{M}+\text{H}-\text{H}_2\text{O}]^+$  173.1330, found 173.1338.  $[\alpha]_{\text{D}}^{20}$ : -36.1 (c = 0.400,  $\text{CHCl}_3$ ,  $l = 50$  mm). The absolute stereochemistry was assigned by comparing the optical rotation with a reported value in the literature for (*S*)-**3-OH**,  $[\alpha]_{\text{D}}^{20}$ : -28.3 (c = 0.05,  $\text{CDCl}_3$ , 90:10 er).<sup>15</sup>

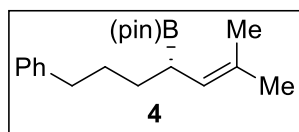

**(S)-4,4,5,5-Tetramethyl-2-(2-methyl-7-phenylhept-2-en-4-yl)-1,3,2-dioxaborolane (4)**. The reaction was performed according to the

*Representative Procedure (Method D)*. The crude mixture was purified by silica gel chromatography (20%  $\text{CH}_2\text{Cl}_2$ /hexanes, stain in CAM) to afford a clear, colorless oil (26.4 mg, 84% yield).  $R_f = 0.7$  in 50%  $\text{CH}_2\text{Cl}_2$ /hexanes on TLC.  $^1\text{H-NMR}$  (500 MHz,  $\text{CDCl}_3$ )  $\delta$  7.24-7.27 (m, 2H), 7.14-7.17 (m, 3H), 5.03 (d,  $J = 9.5$  Hz, 1H), 2.54-2.63 (m, 2H), 1.97 (q,  $J = 8.0$  Hz, 1H), 1.69 (s, 3H), 1.52-1.66 (m, 6H), 1.39-1.45 (m, 1H), 1.22 (s, 6H), 1.21 (s, 6H).  $^{13}\text{C-NMR}$  (125 MHz,  $\text{CDCl}_3$ )  $\delta$  143.06, 130.87, 128.53, 128.33, 125.64, 125.33, 83.04, 36.21, 31.48, 31.20, 26.01, 24.89, 24.69, 18.32.  $^{11}\text{B-NMR}$  (160 MHz,  $\text{CDCl}_3$ )  $\delta$  33.03. IR (neat)  $\nu_{\text{max}}$  3026 (m), 2977 (s), 2926 (s), 2855 (s), 1603 (w) 1496 (m), 1453 (m) 1370 (s), 1317 (s), 1272 (m), 1214 (m), 1143 (s), 1106 (m), 968 (m), 886 (m), 835 (m), 747 (m), 698 (s). HRMS (ESI) calc. for  $\text{C}_{20}\text{H}_{32}\text{B}_1\text{O}_2$   $[\text{M}+\text{H}]^+$  315.2495, found 315.2490.  $[\alpha]_{\text{D}}^{20}$ : +8.67 (c = 0.870,  $\text{CHCl}_3$ ,  $l = 50$  mm).

#### ***Analysis of Stereochemistry:***

The enantiomeric ratio was determined by chiral SFC analysis of the corresponding secondary allylic alcohol. The racemic alcohol was prepared analogously with racemic **L4** and the corresponding geminal bis(boronate) according to *Method A*.

*Chiral SFC (OD-H, Chiraldex, 3 mL/min, 7%  $^i\text{PrOH}$ , 100 bar, 35  $^\circ\text{C}$ )-analysis of the reaction product.*

<sup>15</sup> Lurain, A. E.; Maestri, A.; Kelly, A. R.; Carroll, P. J.; Walsh, P. J. *J. Am. Chem. Soc.* **2004**, *126*, 13609.

## Racemic

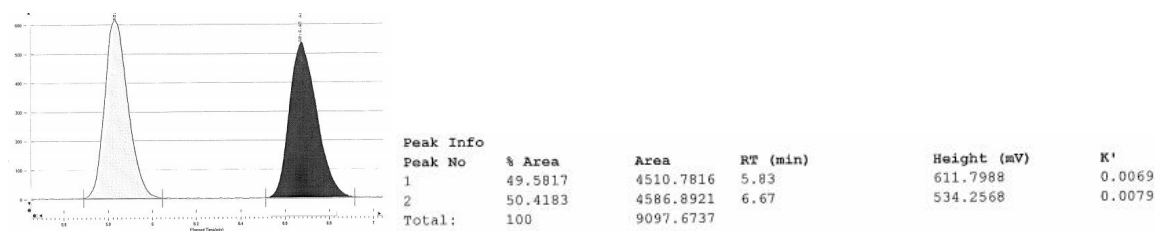

## Reaction product

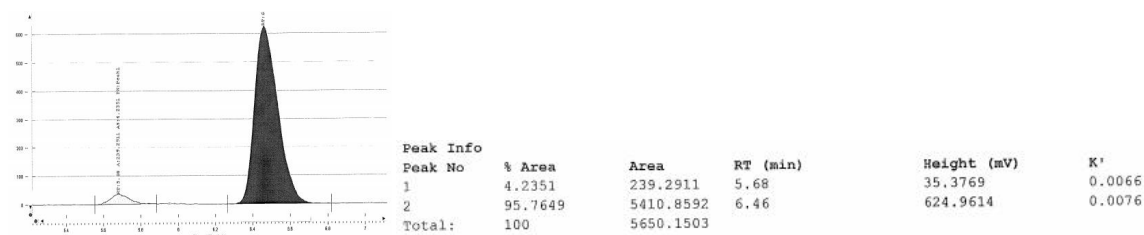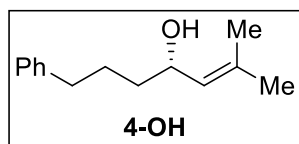

**(S)-2-Methyl-7-phenylhept-2-en-4-ol (4-OH).** The reaction was performed according to the *Representative Procedure (Method E)*. The crude mixture was purified by silica gel chromatography (20% ethyl acetate/hexanes, stain in CAM) to afford a clear, colorless oil.  $R_f = 0.5$  in 20% ethyl acetate/hexanes on TLC.  $^1\text{H-NMR}$  (500 MHz,  $\text{CDCl}_3$ )  $\delta$  7.26-7.29 (m, 2H), 7.16-7.19 (m, 3H), 5.16 (d,  $J = 8.5$  Hz, 1H), 4.36 (m, 1H), 2.63 (t,  $J = 7.0$  Hz, 2H), 1.72 (s, 3H), 1.59-1.69 (m, 6H), 1.44-1.51 (m, 1H), 1.26 (d,  $J = 3.0$  Hz, 1H).  $^{13}\text{C-NMR}$  (125 MHz,  $\text{CDCl}_3$ )  $\delta$  142.58, 135.41, 128.56, 128.42, 128.24, 125.85, 68.72, 37.43, 36.03, 27.43, 25.92, 18.39. IR (neat)  $\nu_{\text{max}}$  3358 (br), 3063 (w), 3026 (m), 2923 (s), 2855 (s), 1673 (m), 1584 (m), 1553 (m), 1496 (s), 1452 (s), 1375 (s), 1056 (s), 985 (s), 747 (s), 698 (s). HRMS (ESI) calc. for  $\text{C}_{14}\text{H}_{19}$   $[\text{M}+\text{H}-\text{H}_2\text{O}]^+$  187.1486, found 187.1480.  $[\alpha]_{\text{D}}^{20}$ : -6.53 ( $c = 0.575$ ,  $\text{CHCl}_3$ ,  $l = 50$  mm).

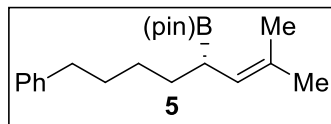

**(S)-4,4,5,5-Tetramethyl-2-(2-methyl-8-phenyloct-2-en-4-yl)-1,3,2-dioxaborolane (5).** The reaction was performed according to the *Representative Procedure (Method D)*. The crude mixture was purified by silica gel chromatography (20%  $\text{CH}_2\text{Cl}_2$ /hexanes, stain in CAM) to afford a clear, colorless oil (26.3mg, 80%).  $R_f = 0.8$  in 50%  $\text{CH}_2\text{Cl}_2$ /hexanes on TLC.  $^1\text{H-NMR}$  (500 MHz,  $\text{CDCl}_3$ )  $\delta$  7.24-7.27 (m, 2H), 7.14-7.17 (m, 3H), 5.03 (d,  $J = 9.0$  Hz, 1H), 2.54-2.63 (m, 2H),

1.91-1.95 (q,  $J = 8.0$  Hz, 1H), 1.69 (s, 3H), 1.51-1.63 (m, 5H), 1.25-1.44 (m, 4H), 1.21 (s, 6H), 1.19 (s, 6H).  $^{13}\text{C-NMR}$  (125 MHz,  $\text{CDCl}_3$ )  $\delta$  143.06, 130.76, 128.56, 128.31, 125.63, 125.50, 83.00, 36.05, 31.68, 31.64, 29.01, 25.99, 24.85, 24.67, 18.29.  $^{11}\text{B-NMR}$  (160 MHz,  $\text{CDCl}_3$ )  $\delta$  33.01. IR (neat)  $\nu_{\text{max}}$  3026 (w), 2976 (s), 2925 (s), 2855 (s), 1604 (w), 1453 (m), 1370 (s), 1316 (s), 1266 (m), 1214 (m), 1143 (s), 1107 (m), 967 (m), 838 (m) 746 (m), 698 (s). HRMS (ESI) calc. for  $\text{C}_{21}\text{H}_{34}\text{B}_1\text{O}_2$   $[\text{M}+\text{H}]^+$  329.2651, found 329.2664.  $[\alpha]_{\text{D}}^{20}$ : +10.7 ( $c = 0.680$ ,  $\text{CHCl}_3$ ,  $l = 50$  mm).

### Analysis of Stereochemistry:

The enantiomeric ratio was determined by chiral SFC analysis of the corresponding secondary allylic alcohol. The racemic alcohol was prepared analogously with racemic **L4** and the corresponding geminal bis(boronate) according to *Method A*.

*Chiral SFC (OD-H, Chiraldex, 3 mL/min, 5%  $i\text{PrOH}$ , 100 bar, 35  $^\circ\text{C}$ )-analysis of the reaction product.*

#### Racemic

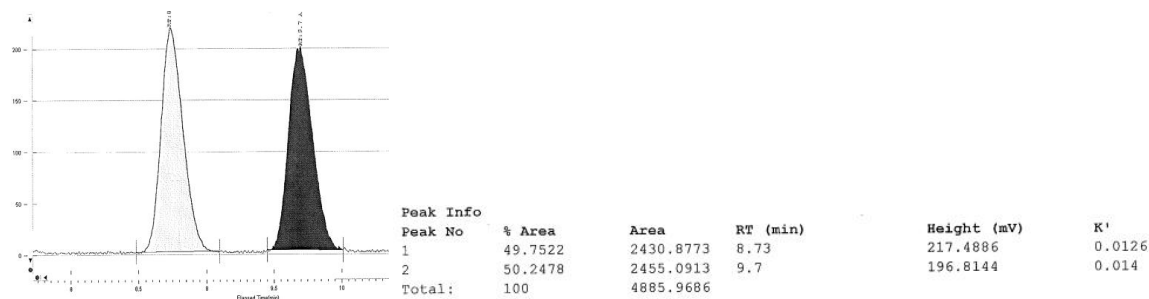

#### Reaction product

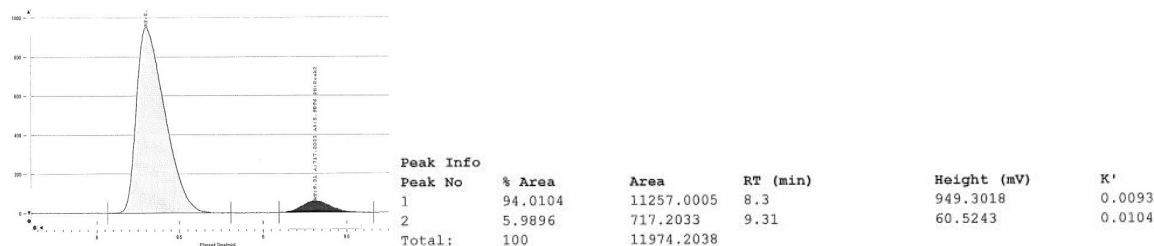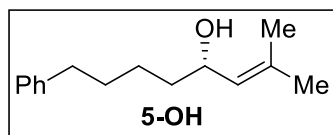

**(S)-2-Methyl-8-phenyloct-2-en-4-ol (5-OH)**. The reaction was performed according to the *Representative Procedure (Method E)*.

The crude mixture was purified by silica gel chromatography (20% ethyl acetate/hexanes, stain in CAM) to afford a clear, colorless oil.  $R_f = 0.5$  in 20% ethyl

acetate/hexanes on TLC.  $^1\text{H-NMR}$  (500 MHz,  $\text{CDCl}_3$ )  $\delta$  7.26-7.29 (m, 2H), 7.17-7.19 (m, 3H), 5.16 (d,  $J = 8.5$  Hz, 1H), 4.31-4.36 (m, 1H), 2.60-2.63 (t,  $J = 8.5$  Hz, 2H), 1.72 (s, 3H), 1.59-1.68 (m, 6H), 1.31-1.50 (m, 3H), 1.28 (d,  $J = 3.5$  Hz, 1H).  $^{13}\text{C-NMR}$  (125 MHz,  $\text{CDCl}_3$ )  $\delta$  142.81, 135.31, 128.54, 128.40, 128.35, 125.78, 68.80, 37.68, 36.10, 31.65, 25.92, 25.33, 18.37. IR (neat)  $\nu_{\text{max}}$  3344 (br), 3063 (w), 3026 (m), 2927 (s), 2855 (s), 1673 (m), 1603 (m), 1495 (m), 1452 (s), 1375 (m), 1051 (s), 999 (s), 840 (m), 745 (s), 697 (s), 510 (m). HRMS (ESI) calc. for  $\text{C}_{12}\text{H}_{21}$   $[\text{M}+\text{H}-\text{H}_2\text{O}]^+$  201.1643, found 201.1653.  $[\alpha]_{\text{D}}^{20}$ : -10.1 ( $c = 0.440$ ,  $\text{CHCl}_3$ ,  $l = 50$  mm).

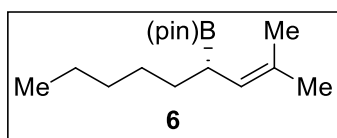

**(S)-4,4,5,5-Tetramethyl-2-(2-methylnon-2-en-4-yl)-1,3,2-dioxaborolane (6).** The reaction was performed according to the *Representative Procedure (Method D)*. The crude mixture was

purified by silica gel chromatography (10%  $\text{CH}_2\text{Cl}_2$ /hexanes, stain in CAM) to afford a clear, colorless oil (17.6 mg, 66% yield).  $R_f = 0.7$  in 50%  $\text{CH}_2\text{Cl}_2$ /hexanes on TLC.  $^1\text{H NMR}$  (500 MHz,  $\text{CDCl}_3$ )  $\delta$  5.03 (d,  $J = 9.5$  Hz, 1H), 1.92 (q,  $J = 7.5$  Hz, 1H), 1.69 (s, 3H), 1.59 (s, 3H), 1.49 (m, 1H), 1.36-1.28 (m, 19H), 0.86 (t,  $J = 6.5$  Hz, 3H).  $^{13}\text{C NMR}$  (125 MHz,  $\text{CDCl}_3$ )  $\delta$  130.60, 125.68, 82.97, 32.11, 31.77, 29.06, 25.99, 24.88, 24.69, 22.76, 18.29, 14.21.  $^{11}\text{B NMR}$  (160 MHz,  $\text{CDCl}_3$ )  $\delta$  33.01. IR (neat)  $\nu_{\text{max}}$  2976 (w), 2960 (w), 2923 (m), 2855 (w), 1458 (w), 1369 (m), 1314 (s), 1269 (w), 1215 (w), 1142 (s), 967 (m), 881 (w), 836 (m), 672 (w)  $\text{cm}^{-1}$ . HRMS (ESI+) calc. for  $\text{C}_{16}\text{H}_{32}\text{BO}_2$   $[\text{M}+\text{H}]^+$  267.2495, found 267.2492.  $[\alpha]_{\text{D}}^{20}$ : +14.7 ( $c = 0.875$ ,  $\text{CHCl}_3$ ,  $l = 50$  mm).

#### ***Analysis of Stereochemistry:***

The enantiomeric ratio was determined by chiral SFC analysis of the corresponding secondary homoallylic alcohol. The racemic alcohol was prepared analogously with racemic **L4** and the corresponding geminal bis(boronate) according to *Methods A* and *F*.

*Chiral SFC (OD-H, Chiraldex, 3 mL/min, 7%  $^i\text{PrOH}$ , 100 bar, 35  $^\circ\text{C}$ )-analysis of the reaction product.*

## Racemic

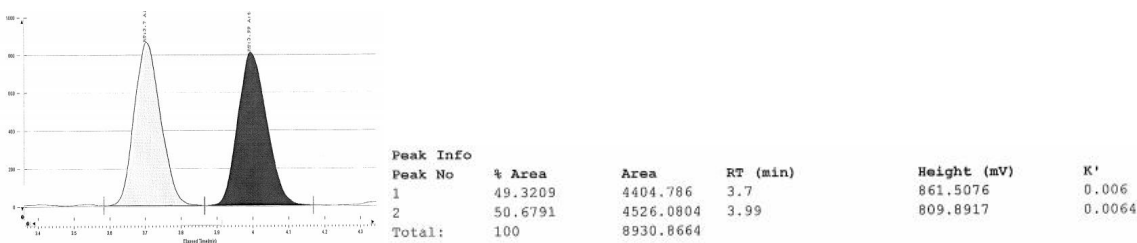

## Reaction product

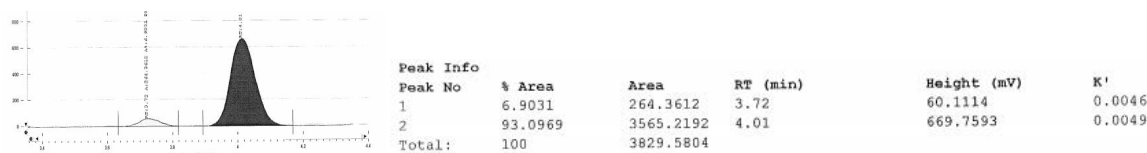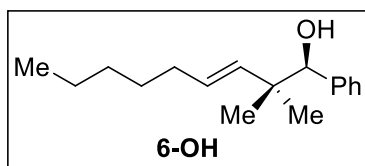

**(*R,E*)-2,2-Dimethyl-1-phenylnon-3-en-1-ol (6-OH).** The reaction was performed according to the *Representative Procedure (Method F)*. The crude mixture was purified by silica gel chromatography (20% CH<sub>2</sub>Cl<sub>2</sub>/pentanes, stain in CAM) to

afford a colorless oil.  $R_f = 0.1$  in 20% CH<sub>2</sub>Cl<sub>2</sub>/pentanes on TLC. <sup>1</sup>H NMR (500 MHz, CDCl<sub>3</sub>)  $\delta$  7.31-7.23 (m, 5H), 5.49-5.46 (m, 2H), 4.38 (d,  $J = 2.5$  Hz, 1H), 2.08-2.02 (m, 3H), 1.41-1.24 (m, 6H), 0.99 (s, 3H), 0.93 (s, 3H), 0.90 (t,  $J = 7.5$  Hz, 3H). <sup>13</sup>C NMR (125 MHz, CDCl<sub>3</sub>)  $\delta$  141.01, 136.61, 130.56, 127.99, 127.54, 127.41, 80.95, 41.63, 33.00, 31.58, 29.41, 25.29, 22.68, 21.74, 14.21. IR (neat)  $\nu_{\max}$  3460 (br), 3063 (w), 3028 (w), 2957 (s), 2925 (s), 2855 (m), 1453 (m), 1380 (w), 1186 (w), 1041 (m), 979 (m), 740 (m), 701 (s) cm<sup>-1</sup>. HRMS (ESI+) calc. for C<sub>17</sub>H<sub>25</sub> [M+H-H<sub>2</sub>O]<sup>+</sup> 229.1956, found 229.1958.  $[\alpha]_D^{20}$ : +39.7 ( $c = 0.375$ , CHCl<sub>3</sub>,  $l = 50$  mm).

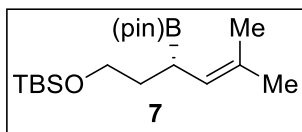

**(*S*)-*tert*-Butyldimethyl((5-methyl-3-(4,4,5,5-tetramethyl-1,3,2-dioxaborolan-2-yl)hex-4-en-1-yl)oxy)silane (7).** The reaction was performed according to the *Representative Procedure (Method D)*. The

crude mixture was purified by silica gel chromatography (40% CH<sub>2</sub>Cl<sub>2</sub>/hexanes, stain in CAM) to afford a clear, colorless oil (22.0 mg, 62% yield).  $R_f = 0.5$  in 50% CH<sub>2</sub>Cl<sub>2</sub>/hexanes on TLC. <sup>1</sup>H NMR (500 MHz, CDCl<sub>3</sub>)  $\delta$  5.01 (d,  $J = 9.5$  Hz, 1H), 3.56 (m, 2H), 2.03 (q,  $J = 8.5$  Hz, 1H), 1.75 (tt,  $J = 13.5, 7.0$  Hz, 1H), 1.68 (s, 3H), 1.62-1.50 (m, 4H), 1.22 (s, 6H), 1.21 (s, 6H), 0.88 (s, 9H),

0.03 (s, 6H).  $^{13}\text{C}$  NMR (125 MHz,  $\text{CDCl}_3$ )  $\delta$  131.29, 124.79, 83.05, 62.75, 34.63, 26.15, 25.96, 24.87, 24.68, 18.53, 18.31, -5.11, -5.13.  $^{11}\text{B}$  NMR (160 MHz,  $\text{CDCl}_3$ )  $\delta$  32.95. IR (neat)  $\nu_{\text{max}}$  2976 (w), 2956 (m), 2928 (s), 2857 (s), 1471 (m), 1360 (s), 1315 (s), 1252 (s), 1143 (s), 1093 (s), 1005 (m), 935 (m), 833 (s), 773 (s), 664 (m)  $\text{cm}^{-1}$ . HRMS (ESI+) calc. for  $\text{C}_{19}\text{H}_{40}\text{BO}_3\text{Si}$   $[\text{M}+\text{H}]^+$  355.2839, found 355.2843.  $[\alpha]_{\text{D}}^{20}$ : +21.6 ( $c = 1.05$ ,  $\text{CHCl}_3$ ,  $l = 50$  mm).

### Analysis of Stereochemistry:

The enantiomeric ratio was determined by chiral SFC analysis of the corresponding secondary homoallylic alcohol. The racemic alcohol was prepared analogously with racemic **L4** and the corresponding geminal bis(boronate) according to *Methods A* and *F*.

Chiral SFC (OD-H, Chiraldex, 3 mL/min, 5%  $i\text{PrOH}$ , 100 bar, 35  $^\circ\text{C}$ )-analysis of the reaction product.

#### Racemic

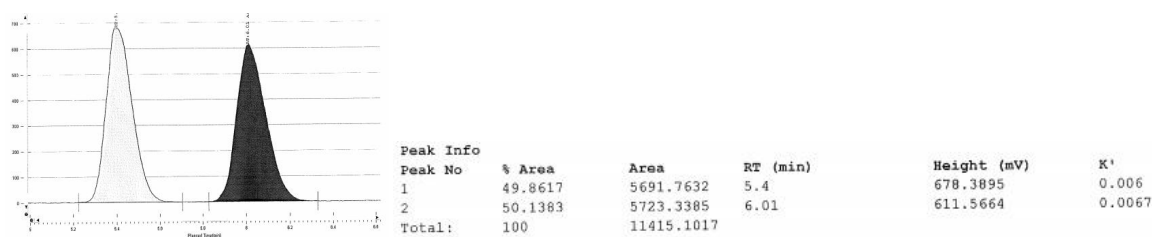

#### Reaction product

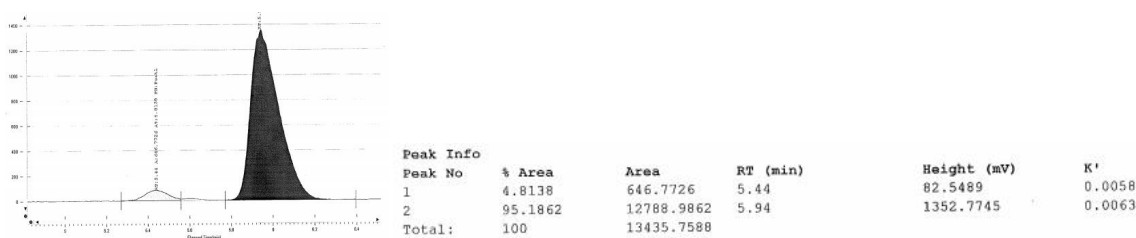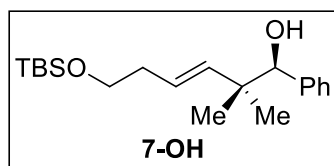

**(*R,E*)-6-((*tert*-Butyldimethylsilyl)oxy)-2,2-dimethyl-1-phenylhex-3-en-1-ol (**7-OH**)**. The reaction was performed according to the *Representative Procedure (Method F)*. The crude mixture was purified by silica gel chromatography (3% ethyl acetate/hexanes, stain in CAM) to afford a clear, colorless oil.  $R_f = 0.3$  in 5% ethyl acetate/hexanes on TLC.  $^1\text{H}$

NMR (500 MHz,  $\text{CDCl}_3$ ) 7.33-7.23 (m, 5H), 5.54 (d,  $J = 16.5$  Hz, 1H), 5.48 (dt,  $J = 16.0, 7.0$  Hz,

1H), 4.37 (d,  $J = 3.0$  Hz, 1H), 3.65 (t,  $J = 7.0$  Hz, 2H), 2.29 (q,  $J = 6.5$  Hz, 2H), 2.12 (d,  $J = 3.0$  Hz, 1H), 1.00 (s, 3H), 0.93 (s, 3H), 0.90 (s, 9H), 0.06 (s, 6H).  $^{13}\text{C}$  NMR (125 MHz,  $\text{CDCl}_3$ )  $\delta$  140.96, 138.90, 128.00, 127.55, 127.43, 126.85, 80.81, 63.15, 41.80, 36.64, 26.14, 25.17, 21.55, 18.55, -5.09. IR (neat)  $\nu_{\text{max}}$  3446 (br), 3086 (w), 3028 (m), 2955 (s), 2928 (s), 2857 (s), 1493 (m), 1384 (m), 1360 (m), 1254 (s), 1187 (m), 1097 (s), 1044 (m), 834 (s), 775 (s), 702 (m)  $\text{cm}^{-1}$ . HRMS (ESI+) calc. for  $\text{C}_{20}\text{H}_{33}\text{OSi}$   $[\text{M}+\text{H}-\text{H}_2\text{O}]^+$  317.2301, found 317.2317.  $[\alpha]_{\text{D}}^{20}$ : +40.0 ( $c = 0.470$ ,  $\text{CHCl}_3$ ,  $l = 50$  mm).

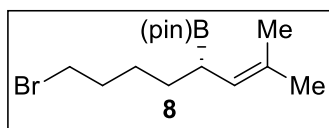

**(S)-2-(8-Bromo-2-methyloct-2-en-4-yl)-4,4,5,5-tetramethyl-1,3,2-dioxaborolane (8)**. The reaction was performed according to the *Representative Procedure (Method D)*. The crude mixture was

purified by silica gel chromatography (20%  $\text{CH}_2\text{Cl}_2$ /hexanes, stain in CAM) to afford a clear, colorless oil (17.2 mg, 52% yield).  $R_f = 0.7$  in 50%  $\text{CH}_2\text{Cl}_2$ /hexanes on TLC.  $^1\text{H}$  NMR (500 MHz,  $\text{CDCl}_3$ )  $\delta$  5.01 (d,  $J = 9.5$  Hz, 1H), 3.39 (t,  $J = 6.5$  Hz, 2H), 1.93 (q,  $J = 7.5$  Hz, 1H), 1.84 (p,  $J = 6.5$  Hz, 2H), 1.69 (s, 3H), 1.60 (s, 3H), 1.58-1.33 (m, 4H), 1.23 (s, 6H), 1.22 (s, 6H).  $^{13}\text{C}$  NMR (125 MHz,  $\text{CDCl}_3$ )  $\delta$  131.00, 124.89, 82.95, 33.94, 32.92, 30.66, 27.73, 25.83, 24.73, 24.53, 18.16.  $^{11}\text{B}$  NMR (160 MHz,  $\text{CDCl}_3$ )  $\delta$  32.93. IR (neat)  $\nu_{\text{max}}$  2977 (s), 2927 (s), 2856 (m), 1447 (w), 1370 (s), 1318 (s), 1272 (m), 1213 (w), 1144 (s), 1106 (w), 968 (m), 837 (m), 684 (w)  $\text{cm}^{-1}$ . HRMS (ESI+) calc. for  $\text{C}_{15}\text{H}_{29}\text{BBrO}_2$   $[\text{M}+\text{H}]^+$  331.1444, found 331.1437.  $[\alpha]_{\text{D}}^{20}$ : +15.5 ( $c = 0.580$ ,  $\text{CHCl}_3$ ,  $l = 50$  mm).

#### **Analysis of Stereochemistry:**

The enantiomeric ratio was determined by chiral SFC analysis of the corresponding secondary homoallylic alcohol. The racemic alcohol was prepared analogously with racemic **L4** and the corresponding geminal bis(boronate) according to *Methods A* and *F*.

*Chiral SFC (OD-H, Chiraldex, 3 mL/min, 7%  $^i\text{PrOH}$ , 100 bar, 35  $^\circ\text{C}$ )-analysis of the reaction product.*

## Racemic

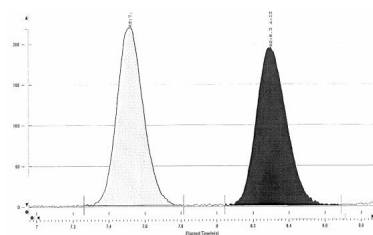

| Peak No | % Area  | Area      | RT (min) | Height (mV) | K'     |
|---------|---------|-----------|----------|-------------|--------|
| 1       | 49.8344 | 2250.631  | 7.52     | 218.3679    | 0.0068 |
| 2       | 50.1656 | 2265.5901 | 8.3      | 194.2613    | 0.0075 |
| Total:  | 100     | 4516.2211 |          |             |        |

## Reaction product

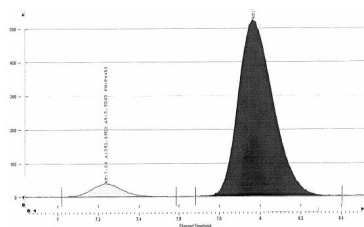

| Peak No | % Area  | Area      | RT (min) | Height (mV) | K'     |
|---------|---------|-----------|----------|-------------|--------|
| 1       | 5.9263  | 391.4903  | 7.24     | 38.8167     | 0.0068 |
| 2       | 94.0737 | 6214.4968 | 7.97     | 523.5658    | 0.0075 |
| Total:  | 100     | 6605.9871 |          |             |        |

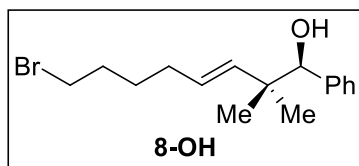**(*R,E*)-8-bromo-2,2-dimethyl-1-phenyloct-3-en-1-ol (8-OH).**

The reaction was performed according to the *Representative Procedure (Method F)*. The crude mixture was purified by silica gel chromatography (3% ethyl acetate/hexanes, stain in CAM) to afford a clear, colorless oil.  $R_f = 0.2$  in 5% ethyl acetate/hexanes on TLC.  $^1\text{H NMR}$  (500 MHz,  $\text{CDCl}_3$ )  $\delta$  7.33-7.24 (m, 5H), 5.52 (d,  $J = 15.5$  Hz, 1H), 5.42 (dt,  $J = 16.0, 7.0$  Hz, 1H), 4.40 (d,  $J = 2.0$  Hz, 1H), 3.41 (t,  $J = 7.0$  Hz, 2H), 2.09 (q,  $J = 6.5$  Hz, 2H), 1.98 (d,  $J = 3.0$  Hz, 1H), 1.86 (p,  $J = 7.0$  Hz, 2H), 1.56-1.48 (m, 2H), 1.00 (s, 3H), 0.94 (s, 3H).  $^{13}\text{C NMR}$  (125 MHz,  $\text{CDCl}_3$ )  $\delta$  141.08, 137.47, 129.16, 127.95, 127.60, 127.50, 81.10, 41.62, 33.87, 32.38, 32.08, 28.17, 25.12, 22.04. IR (neat)  $\nu_{\text{max}}$  3455 (br), 3085 (w), 3062 (w), 3028 (w), 2960 (s), 2928 (s), 2856 (m), 1729 (w), 1585 (w), 1492 (w), 1452 (s), 1362 (m), 1249 (m), 1186 (m), 1082 (w), 1040 (s), 1003 (m), 978 (s), 740 (s), 702 (s)  $\text{cm}^{-1}$ . HRMS (ESI+) calc. for  $\text{C}_{16}\text{H}_{22}\text{Br}$   $[\text{M}+\text{H}-\text{H}_2\text{O}]^+$  293.0905, found 293.0905.  $[\alpha]_{\text{D}}^{20}$ : +32.4 ( $c = 0.200$ ,  $\text{CHCl}_3$ ,  $l = 50$  mm).

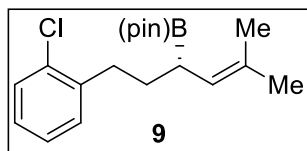**(*S*)-2-(1-(2-chlorophenyl)-5-methylhex-4-en-3-yl)-4,4,5,5-tetramethyl-1,3,2-dioxaborolane (9).**

The reaction was performed according to the *Representative Procedure (Method C)*. The crude mixture was purified by silica gel chromatography (30% DCM/hexanes, stain in CAM) to afford



a clear, colorless oil (28.3 mg, 85% yield).  $R_f = 0.3$  in 50% DCM/hexanes on TLC.  $^1\text{H}$  NMR (500 MHz,  $\text{CDCl}_3$ )  $\delta$  7.30 (d,  $J = 8.0$  Hz, 1H), 7.19 (dd,  $J = 7.0, 1.5$  Hz, 1H), 7.15 (t,  $J = 7.5$ , 1H), 7.09 (dt,  $J = 7.0, 2.0$  Hz, 1H), 5.11 (dd,  $J = 9.5, 1.5$  Hz, 1H), 2.77 (ddd,  $J = 14.0, 11.0, 5.5$  Hz, 1H), 2.64 (ddd,  $J = 13.5, 11.0, 5.5$  Hz, 1H), 2.02 (q,  $J = 8.5$  Hz, 1H), 1.83 (ddt,  $J = 12.0, 10.0, 5.5$  Hz, 1H), 1.73 (s, 3H), 1.71–1.60 (m, 4H), 1.24 (s, 6H), 1.23 (s, 2H).  $^{13}\text{C}$  NMR (125 MHz,  $\text{CDCl}_3$ )  $\delta$  140.57, 134.06, 131.49, 130.57, 129.47, 127.14, 126.73, 124.92, 83.15, 33.30, 31.74, 26.02, 24.93, 24.71, 18.38.  $^{11}\text{B}$  NMR (160 MHz,  $\text{CDCl}_3$ )  $\delta$  32.97. IR (neat)  $\nu_{\text{max}}$  3066 (w), 2976 (m), 2925 (m), 2858 (m), 1572 (w), 1474 (m), 1443 (m), 1370 (s), 1341 (s), 1317 (s), 1268 (m), 1244 (m), 1215 (m), 1165 (m), 1141 (s), 1102 (m), 1053 (m), 986 (w), 876 (w), 855 (w), 838 (w), 750 (s), 679 (m)  $\text{cm}^{-1}$ . HRMS (ESI+) calc. for  $\text{C}_{19}\text{H}_{29}\text{BClO}_2$   $[\text{M}+\text{H}]^+$  335.1949, found 335.1945.  $[\alpha]_{\text{D}}^{20}$ : +2.70  $c = 1.130$ ,  $\text{CHCl}_3$ ,  $l = 50$  mm).

### Analysis of Stereochemistry:

The enantiomeric ratio was determined by chiral SFC analysis of the corresponding secondary allylic alcohol. The racemic alcohol was prepared analogously with racemic **L4** and the corresponding geminal bis(boronate) according to *Method A*.

*Chiral SFC (OD-H, Chiraldex, 3 mL/min, 7%  $i\text{PrOH}$ , 100 bar, 35  $^\circ\text{C}$ )-analysis of the reaction product.*

#### Racemic

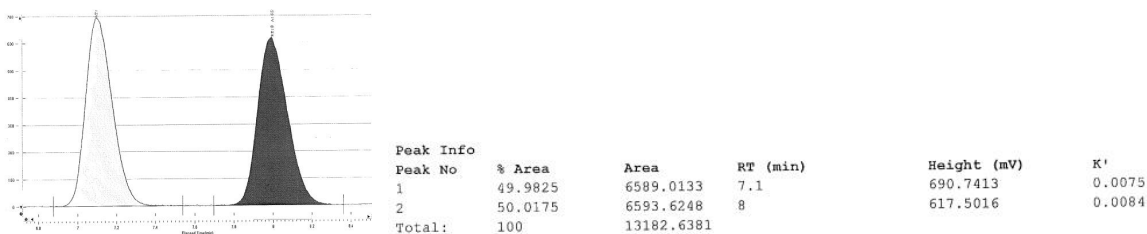

#### Reaction product

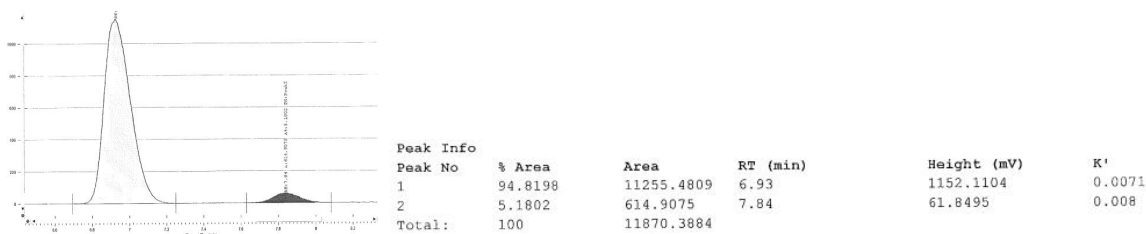

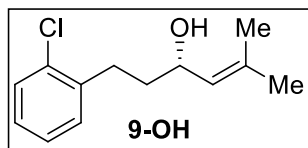

**(S)-1-(2-Chlorophenyl)-5-methylhex-4-en-3-ol (9-OH).** The

reaction was performed according to the *Representative Procedure (Method D)*. The crude mixture was purified by silica gel chromatography (20% ethyl acetate/hexanes, stain in CAM) to afford a clear, colorless oil.  $R_f = 0.3$  in 7/2/1 hexanes/ $\text{CH}_2\text{Cl}_2$ /ethyl acetate on TLC.  $^1\text{H}$  NMR (500 MHz,  $\text{CDCl}_3$ )  $\delta$  7.33 (dd,  $J = 7.0, 1.0$  Hz, 1H), 7.23 (dd,  $J = 7.0, 1.5$  Hz, 1H), 7.18 (dt,  $J = 7.0, 1.0$  Hz, 1H), 7.13 (dt,  $J = 8.0, 2.0$  Hz, 1H), 5.24 (dt,  $J = 9.0, 1.5$  Hz, 1H) 4.39 (q,  $J = 7.0$  Hz, 1H), 2.86-2.70 (m, 2H), 1.89 (dddd,  $J = 16.0, 13.5, 7.0, 6.0$  Hz, 1H) 1.80-1.71 (m, 4H), 1.68 (d, 1.0 Hz, 3H), 1.59 (s, 1H).  $^{13}\text{C}$  NMR (125 MHz,  $\text{CDCl}_3$ )  $\delta$  139.81, 135.86, 134.09, 130.45, 129.60, 127.93, 127.40, 126.88, 68.41, 37.55, 29.83, 25.92, 18.41 IR (neat)  $\nu_{\text{max}}$  3347 (br), 3066 (w), 3014 (w), 2967 (m), 2928 (m), 2863 (w), 1675 (w), 1571 (w), 1474 (m), 1443 (m), 1376 (w), 1051 (s), 1035 (m), 1003 (w), 9112 (w), 844 (w), 823 (w), 750 (s), 681 (w)  $\text{cm}^{-1}$ . HRMS (ESI+) calc. for  $\text{C}_{13}\text{H}_{16}\text{Cl}$   $[\text{M}+\text{H}-\text{H}_2\text{O}]^+$  207.0941, found 207.0938.  $[\alpha]_{\text{D}}^{20}$ : -34.8 ( $c = 0.680$ ,  $\text{CHCl}_3$ ,  $l = 50$  mm).

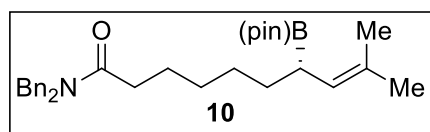

**(S)-N,N-Dibenzyl-9-methyl-7-(4,4,5,5-tetramethyl-1,3,2-dioxaborolan-2-yl)dec-8-enamide (10).** The reaction was

performed according to the *Representative Procedure (Method D)*. The crude reaction mixture was purified by column chromatography on  $\text{SiO}_2$  (10% ethyl acetate in hexanes, stain in CAM) to afford an inseparable mixture of the title compound and protodeboration of the geminal bis(boronate) **10-S**. The mixture was oxidized according to the *Representative Procedure (Method E)* to **10-OH** as follows.

#### ***Analysis of Stereochemistry:***

The enantiomeric ratio was determined by chiral SFC analysis of the corresponding secondary allylic alcohol. The racemic alcohol was prepared analogously with racemic **L4** and the corresponding geminal bis(boronate) according to *Method A*.

*Chiral SFC (AD-H, Chiraldex, 3 mL/min, 20% MeOH, 100 bar, 35 °C)-analysis of the reaction product.*

## Racemic

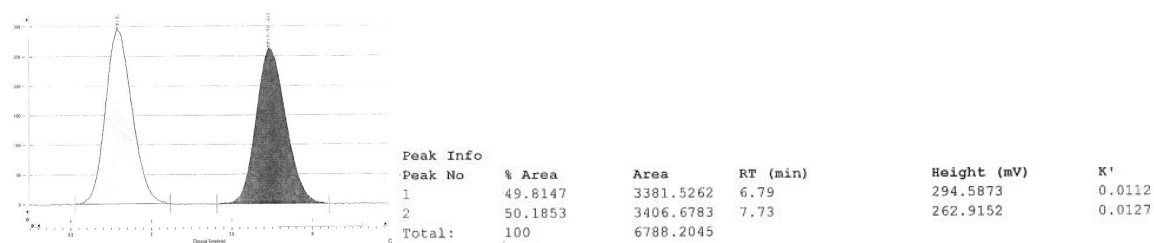

## Reaction product

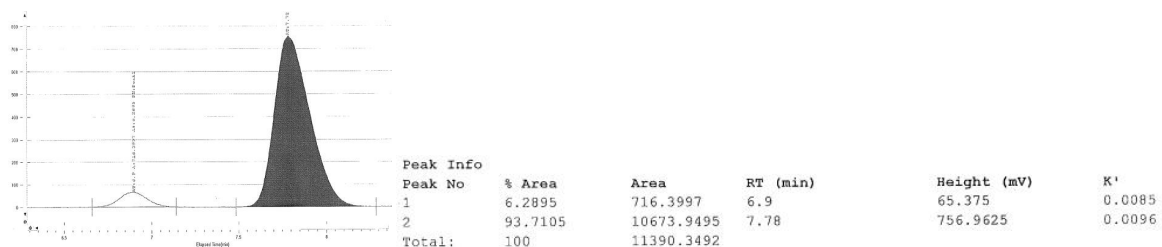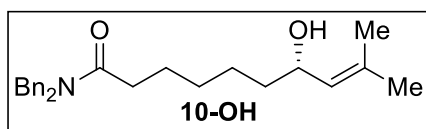

**(S)-N,N-Dibenzyl-7-hydroxy-9-methyldec-8-enamide (10-OH).** The reaction was performed according to the

*Representative Procedure (Method E).* The crude reaction

mixture was purified by column chromatography on SiO<sub>2</sub> (25% ethyl acetate in hexanes, stain in CAM) to afford a clear, colorless oil.  $R_f = 0.29$  in 40% ethyl acetate/hexanes on TLC. <sup>1</sup>H-NMR (500 MHz, CDCl<sub>3</sub>)  $\delta$  7.35-7.38 (t,  $J = 6.5$  Hz, 2H), 7.28-7.32 (m, 4H), 7.21 (d,  $J = 7.0$  Hz, 2H), 7.15 (d,  $J = 7.0$  Hz, 2H), 5.14 (d,  $J = 9.0$  Hz, 1H), 4.60 (s, 2H), 4.44 (s, 2H), 4.31 (q,  $J = 6.5$  Hz, 1H), 2.41 (t,  $J = 7.5$  Hz, 2H), 1.70-1.75 (m, 1H) 1.72 (s, 3H), 1.67 (s, (3H), 1.60-1.54 (m, 1H), 1.26-1.43 (m, 7H). <sup>13</sup>C-NMR (125 MHz, CDCl<sub>3</sub>)  $\delta$  173.76, 137.70, 136.80, 135.26, 129.08, 128.73, 128.44, 128.33, 127.72, 127.50, 126.51, 68.78, 50.04, 48.24, 37.71, 33.31, 29.53, 25.92, 25.53, 25.41, 18.39. IR (neat)  $\nu_{max}$  3422 (br), 3062 (w), 3029 (w), 2926 (s), 2855 (m), 2363 (w), 2341 (w), 1637 (s), 1494 (m), 1451 (s), 1361 (m), 1301 (w), 1215 (m), 1077 (m), 1011 (m), 954 (w), 732 (m), 699 (s). HRMS (ESI) calc. for C<sub>25</sub>H<sub>33</sub>NO [M+H-H<sub>2</sub>O]<sup>+</sup> 362.2484, found 362.2472.  $[\alpha]_D^{20}$ : -11.4 (c = 0.280, CHCl<sub>3</sub>, l = 50 mm).

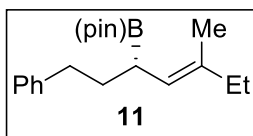

**(S)-4,4,5,5-Tetramethyl-2-(5-methyl-1-phenylhex-4-en-3-yl)-1,3,2-dioxaborolane (11).** The reaction was performed according to the

*Representative Procedure (Method D).* The crude mixture was purified by

silica gel chromatography (30% CH<sub>2</sub>Cl<sub>2</sub>/hexanes, stain in CAM) to afford a clear, colorless oil (25.2 mg, 80% yield).  $R_f = 0.6$  in 50% CH<sub>2</sub>Cl<sub>2</sub>/hexanes on TLC. <sup>1</sup>H NMR (500 MHz, CDCl<sub>3</sub>) δ 7.29-7.23 (m, 2H), 7.20-7.13 (m, 3H), 5.08 (d,  $J = 10.0$  Hz, 1H), 2.65 (ddd,  $J = 13.5, 10.0, 5.0$  Hz, 1H), 2.54 (ddd,  $J = 14.0, 10.5, 6.0$  Hz, 1H), 2.06-1.96 (m, 3H), 1.85 (ddt,  $J = 13.5, 10.5, 6.5$  Hz, 1H), 1.69 (ddt,  $J = 13.5, 8.5, 5.0$  Hz, 1H), 1.60 (s, 3H), 1.23 (s, 6H), 1.22 (s, 6H), 1.00 (t,  $J = 7.5$  Hz, 3H). <sup>13</sup>C NMR (125 MHz, CDCl<sub>3</sub>) δ 143.06, 137.01, 128.64, 128.32, 125.64, 123.72, 83.04, 35.64, 33.65, 32.79, 24.88, 24.65, 16.48, 13.34. <sup>11</sup>B NMR (160 MHz, CDCl<sub>3</sub>) δ 32.92. IR (neat)  $\nu_{max}$  3084 (w), 3063 (w), 3026 (w), 2975 (s), 2926 (s), 2855 (m), 1739 (w), 1604 (w), 1496 (w), 1455 (m), 1370 (s), 1317 (s), 1270 (m), 1192 (m), 1143 (s), 1108 (m), 1072 (w), 967 (m), 876 (w), 847 (m), 748 (m), 699 (s) cm<sup>-1</sup>. HRMS (ESI+) calc. for C<sub>20</sub>H<sub>32</sub>BO<sub>2</sub> [M+H]<sup>+</sup> 315.2495, found 315.2499.  $[\alpha]_D^{20}$ : +3.21 (c = 0.650, CHCl<sub>3</sub>,  $l = 50$  mm).

### Analysis of Stereochemistry:

The enantiomeric ratio was determined by chiral SFC analysis of the corresponding secondary allylic alcohol. The racemic alcohol was prepared analogously with racemic **L4** and the vinyl bromide **11-Br** according to *Method A*.

*Chiral SFC (OD-H, Chiraldex, 3 mL/min, 3% <sup>i</sup>PrOH, 100 bar, 35 °C)-analysis of the reaction product.*

### Racemic

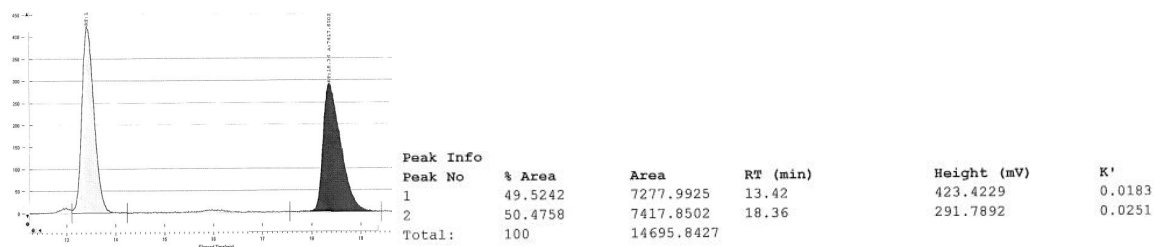

### Reaction product

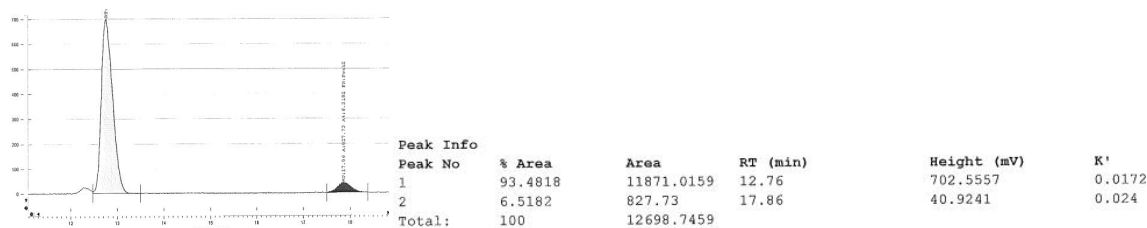

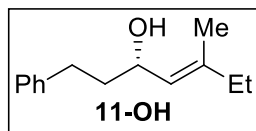

**(S,E)-5-Methyl-1-phenylhept-4-en-3-ol (11-OH).** The reaction was performed according to the *Representative Procedure (Method E)*. The crude mixture was purified by silica gel chromatography (20% ethyl acetate/hexanes, stain in CAM) to afford a clear, colorless oil.  $R_f = 0.3$  in 7/2/1 hexanes/ $\text{CH}_2\text{Cl}_2$ /ethyl acetate on TLC.  $^1\text{H}$  NMR (500 MHz,  $\text{CDCl}_3$ ) 7.30-7.25 (m, 2H), 7.22-7.16 (m, 3H), 5.21 (dd,  $J = 8.5, 1.0$  Hz, 1H), 4.40 (dq,  $J = 9.5, 3.0$  Hz, 1H), 2.74-2.61 (m, 2H), 2.03 (q,  $J = 7.5$  Hz, 2H), 1.93 (ddt,  $J = 13.0, 9.5, 6.5$  Hz, 1H), 1.77 (ddt,  $J = 12.5, 10.0, 6.0$  Hz, 1H), 1.66 (s, 3H), 1.33 (d,  $J = 3.0$  Hz, 1H), 1.02 (t,  $J = 7.5$  Hz, 3H).  $^{13}\text{C}$  NMR (125 MHz,  $\text{CDCl}_3$ )  $\delta$  142.23, 141.05, 128.53, 128.47, 126.40, 125.89, 68.25, 39.36, 32.39, 31.98, 16.72, 12.62. IR (neat)  $\nu_{\text{max}}$  3258 (br), 3024 (w), 3000 (w), 2948 (m), 2926 (m), 2880 (w), 2834 (w), 1608 (m), 1510 (s), 1445 (m), 1341 (w), 1301 (m), 1243 (s), 1176 (m), 1023 (m), 1002 (m), 833 (m), 820 (m), 701 (m)  $\text{cm}^{-1}$ . HRMS (ESI+) calc. for  $\text{C}_{14}\text{H}_{19}$   $[\text{M}+\text{H}-\text{H}_2\text{O}]^+$  187.1487, found 187.1487.  $[\alpha]_{\text{D}}^{20}$ : -23.8 ( $c = 0.375$ ,  $\text{CHCl}_3$ ,  $l = 50$  mm).

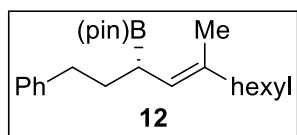

**(S,E)-4,4,5,5-Tetramethyl-2-(5-methyl-1-phenylundec-4-en-3-yl)-1,3,2-dioxaborolane (12).** The reaction was performed according to the *Representative Procedure (Method D)*. The crude mixture was purified

by silica gel chromatography (20%  $\text{CH}_2\text{Cl}_2$ /hexanes, stain in CAM) to afford a clear, colorless oil (32.2 mg, 87% yield).  $R_f = 0.6$  in 50%  $\text{CH}_2\text{Cl}_2$ /hexanes on TLC.  $^1\text{H}$  NMR (500 MHz,  $\text{CDCl}_3$ )  $\delta$  7.28-7.22 (m, 2H), 7.18-7.13 (m, 3H), 5.07 (d,  $J = 9.5$  Hz, 1H), 2.65 (ddd,  $J = 13.0, 10.0, 5.0$  Hz, 1H), 2.52 (ddd,  $J = 13.5, 10.5, 6.0$  Hz, 1H), 2.00 (m, 3H), 1.84 (ddt,  $J = 13.0, 10.0, 6.5$  Hz, 1H), 1.68 (ddt,  $J = 14.5, 10.5, 5.5$  Hz, 1H), 1.57 (s, 3H), 1.41-1.19 (m, 20H), 0.88 (t,  $J = 6.5$  Hz, 3H).  $^{13}\text{C}$  NMR (125 MHz,  $\text{CDCl}_3$ )  $\delta$  143.09, 135.29, 128.65, 128.32, 125.64, 125.00, 83.05, 40.00, 35.67, 33.68, 31.99, 28.96, 28.22, 24.90, 24.69, 22.85, 16.48, 14.29.  $^{11}\text{B}$  NMR (160 MHz,  $\text{CDCl}_3$ )  $\delta$  33.08. IR (neat)  $\nu_{\text{max}}$  3085 (w), 3062 (w), 3026 (w), 2976 (m), 2957 (m), 2925 (s), 2856 (s), 1604 (w), 1496 (w), 1479 (m), 1370 (s), 1317 (s), 1269 (m), 1214 (m), 1143 (s), 1108 (m), 968 (m), 847 (m), 747 (m), 699 (s)  $\text{cm}^{-1}$ . HRMS (ESI+) calc. for  $\text{C}_{24}\text{H}_{40}\text{BO}_2$   $[\text{M}+\text{H}]^+$  371.3121, found 371.3124.  $[\alpha]_{\text{D}}^{20}$ : +6.60 ( $c = 1.39$ ,  $\text{CHCl}_3$ ,  $l = 50$  mm).

### Analysis of Stereochemistry:

The enantiomeric ratio was determined by chiral SFC analysis of the corresponding secondary allylic alcohol. The racemic alcohol was prepared analogously with racemic **L4** and the vinyl bromide **12-Br** according to *Method A*.

*Chiral SFC (OD-H, Chiraldex, 3 mL/min, 4% <sup>i</sup>PrOH, 100 bar, 35 °C)-analysis of the reaction product.*

#### Racemic

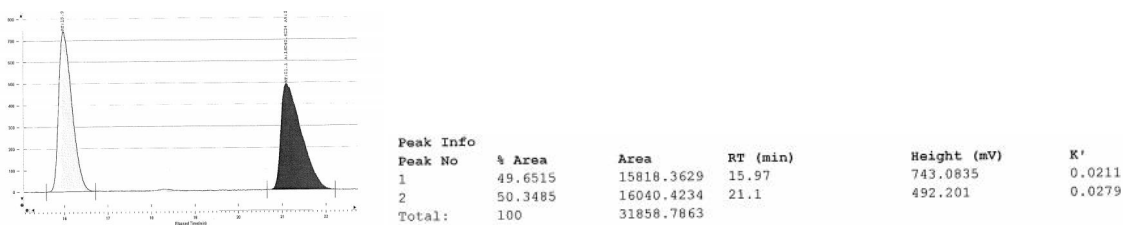

#### Reaction Product

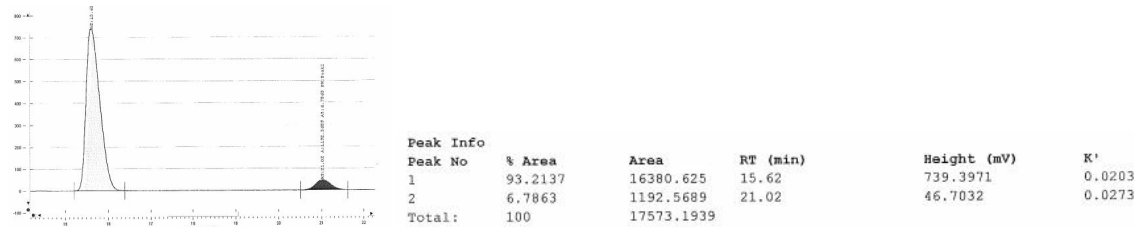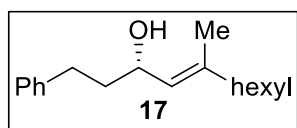

**(*S,E*)-5-Methyl-1-phenylundec-4-en-3-ol (17)**. The reaction was performed according to the *Representative Procedure (Method E)* without the need to first purify the allylic boronate by silica gel chromatography.

The crude oxidation mixture was purified by silica gel chromatography (20% ethyl acetate/hexanes, stain in CAM) to afford a clear, colorless oil (21.3 mg, 82% yield).  $R_f = 0.4$  in 7/2/1 hexanes/ $\text{CH}_2\text{Cl}_2$ /ethyl acetate on TLC.  $^1\text{H}$  NMR (500 MHz,  $\text{CDCl}_3$ )  $\delta$  7.31-7.25 (m, 2H), 7.24-7.15 (m, 3H), 5.22 (d,  $J = 8.5$  Hz, 1H), 4.39 (q,  $J = 7.0$  Hz, 1H), 2.67 (m, 2H), 2.00 (t,  $J = 7.5$  Hz, 2H), 1.93 (ddt,  $J = 13.5, 9.5, 6.5$  Hz, 1H), 1.76 (ddt,  $J = 13.5, 10.0, 6.5$  Hz, 1H), 1.64 (s, 3H), 1.45-1.24 (m, 9H), 0.89 (t,  $J = 5.5$  Hz, 3H).  $^{13}\text{C}$  NMR (125 MHz,  $\text{CDCl}_3$ )  $\delta$  142.24, 139.62, 128.53, 128.47, 127.59, 125.89, 68.26, 39.73, 39.37, 31.98, 31.88, 29.09, 27.84, 22.78, 16.71, 14.24. IR (neat)  $\nu_{\text{max}}$  3432 (br), 3084 (w), 3062 (w), 3026 (w), 2954 (m), 2925 (s), 2856 (s), 1667 (w), 1603 (w), 1495 (m), 1454 (s), 1379 (m), 1300 (w), 1272 (w), 1052 (m), 1030 (m),

1006 (m), 914 (w), 746 (m), 724 (m), 698 (s)  $\text{cm}^{-1}$ . HRMS (ESI+) calc. for  $\text{C}_{18}\text{H}_{27}$   $[\text{M}+\text{H}-\text{H}_2\text{O}]^+$  243.2113, found 243.2122.  $[\alpha]_{\text{D}}^{20}$ : -18.4 ( $c = 0.540$ ,  $\text{CHCl}_3$ ,  $l = 50$  mm).

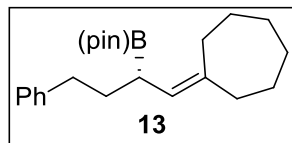

**(S)-2-(1-Cycloheptylidene-4-phenylbutan-2-yl)-4,4,5,5-tetramethyl-1,3,2-dioxaborolane (13)**. The reaction was performed according to the *Representative Procedure (Method D)*. The crude mixture was purified

by silica gel chromatography (30%  $\text{CH}_2\text{Cl}_2$ /hexanes, stain in CAM) to afford a clear, colorless oil (31.2 mg, 88% yield).  $R_f = 0.7$  in 50%  $\text{CH}_2\text{Cl}_2$ /hexanes on TLC.  $^1\text{H}$  NMR (500 MHz,  $\text{CDCl}_3$ )  $\delta$  7.28-7.23 (m, 2H), 7.19-7.13 (m, 3H), 5.10 (d,  $J = 10$  Hz), 1H), 2.67 (ddd,  $J = 13.5, 10.5, 5.5$  Hz, 1H), 2.54 (ddd,  $J = 14.0, 11.0, 6.5$  Hz, 1H), 2.22 (m, 4H), 1.99 (q,  $J = 9.0$  Hz, 1H), 1.84 (ddt,  $J = 12.5, 10.0, 6.0$  Hz, 1H), 1.69 (ddt,  $J = 14.0, 10.0, 5.5$  Hz, 1H), 1.62-1.47 (m, 8H), 1.24 (s, 6H), 1.23 (s, 6H).  $^{13}\text{C}$  NMR (125 MHz,  $\text{CDCl}_3$ )  $\delta$  143.05, 140.95, 128.64, 128.31, 125.64, 125.52, 83.04, 38.06, 35.73, 33.63, 30.65, 30.04, 30.03, 29.32, 27.13, 24.91, 24.69.  $^{11}\text{B}$  NMR (160 MHz,  $\text{CDCl}_3$ )  $\delta$  33.85. IR (neat)  $\nu_{\text{max}}$  3084 (w), 3062 (w), 3026 (w), 2976 (m), 2921 (s), 2852 (m), 1603 (w), 1496 (w), 1454 (m), 1355 (s), 1316 (s), 1270 (m), 1214 (w), 1142 (s), 1106 (m), 967 (m), 852 (m), 837 (m), 748 (m), 699 (s)  $\text{cm}^{-1}$ . HRMS (ESI+) calc. for  $\text{C}_{23}\text{H}_{36}\text{BO}_2$   $[\text{M}+\text{H}]^+$  355.2808, found 355.2805.  $[\alpha]_{\text{D}}^{20}$ : +15.3 ( $c = 1.28$ ,  $\text{CHCl}_3$ ,  $l = 50$  mm).

#### ***Analysis of Stereochemistry:***

The enantiomeric ratio was determined by chiral SFC analysis of the corresponding secondary allylic alcohol. The racemic alcohol was prepared analogously with racemic **L4** and the vinyl bromide **13-Br** according to *Method A*.

*Chiral SFC (OD-H, Chiraldex, 3 mL/min, 10%  $^i\text{PrOH}$ , 100 bar, 35  $^\circ\text{C}$ )-analysis of the reaction product.*

## Racemic

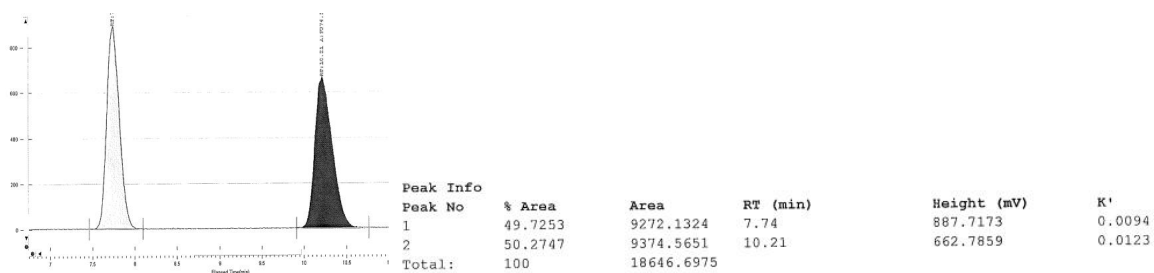

## Reaction product

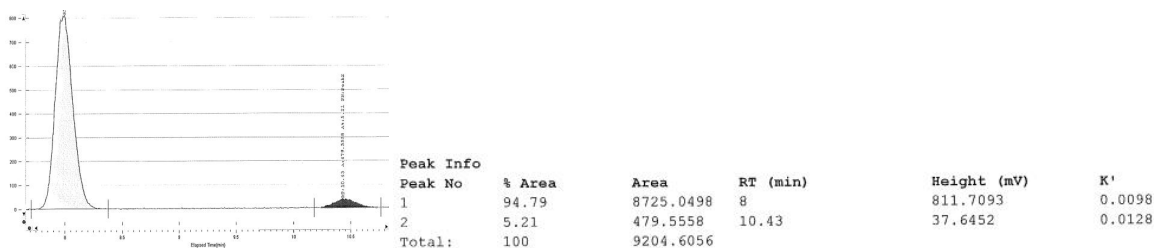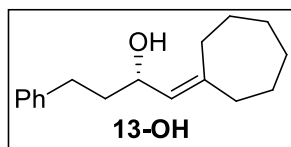

**(S)-1-Cycloheptylidene-4-phenylbutan-2-ol (13-OH).** The reaction was performed according to the *Representative Procedure (Method E)*.

The crude mixture was purified by silica gel chromatography (20% ethyl acetate/hexanes, stain in CAM) to afford a clear, colorless oil.  $R_f = 0.4$  in 7/2/1 hexanes/ $\text{CH}_2\text{Cl}_2$ /ethyl acetate on TLC.  $^1\text{H}$  NMR (500 MHz,  $\text{CDCl}_3$ )  $\delta$  7.30- 7.15 (m, 5H), 5.23 (d,  $J = 8.5$  Hz, 1H), 4.39 (q,  $J = 7.0$  Hz, 1H), 2.69 (m, 4H), 2.32-2.2 (m, 4H), 1.92 (ddt,  $J = 13.0$ , 10.0, 6.5 Hz, 1H), 1.76 (ddt,  $J = 13.5$ , 10.0, 6.0 Hz), 1.66-1.48 (m, 8H), 1.37 (s, 1H).  $^{13}\text{C}$  NMR (125 MHz,  $\text{CDCl}_3$ )  $\delta$  145.28, 142.26, 128.52, 128.46, 128.20, 125.88, 67.90, 39.37, 37.97, 32.04, 30.32, 29.73, 29.13, 29.09, 27.48. IR (neat)  $\nu_{\text{max}}$  3420 (br), 3085 (w), 3061 (w), 3026 (w), 2920 (s), 2851 (s), 2676 (w), 1726 (w), 1655 (w), 1495 (m), 1453 (s), 1276 (w), 1179 (w), 1043 (s), 1030 (m), 996 (m), 914 (w), 746 (s), 698 (s)  $\text{cm}^{-1}$ . HRMS (ESI+) calc. for  $\text{C}_{17}\text{H}_{23}$   $[\text{M}+\text{H}-\text{H}_2\text{O}]^+$  227.1800, found 227.1801.  $[\alpha]_{\text{D}}^{20}$ : -34.6 ( $c = 0.635$ ,  $\text{CHCl}_3$ ,  $l = 50$  mm).

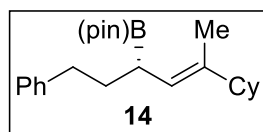

**(S,E)-2-(5-Cyclohexyl-1-phenylhex-4-en-3-yl)-4,4,5,5-tetramethyl-1,3,2-dioxaborolane (14).** The reaction was performed according to the *Representative Procedure (Method D)*. The crude mixture was purified by

silica gel chromatography (30%  $\text{CH}_2\text{Cl}_2$ /hexanes, stain in CAM) to afford a clear, colorless oil



(30.2 mg, 82% yield).  $R_f = 0.6$  in 50%  $\text{CH}_2\text{Cl}_2$ /hexanes on TLC.  $^1\text{H}$  NMR (500 MHz,  $\text{CDCl}_3$ )  $\delta$  7.28-7.22 (m, 2H), 7.18-7.12 (m, 3H), 5.06 (d,  $J = 9.0$  Hz, 1H), 2.64 (ddd,  $J = 14.5, 10.5, 5.5$  Hz, 1H), 2.52 (ddd,  $J = 13.5, 10.5, 6.5$  Hz, 1H), 1.99 (q,  $J = 9.0$  Hz, 1H), 1.90-1.78 (m, 2H), 1.77-1.60 (m, 6H), 1.56 (s, 3H), 1.35-1.06 (m, 17H).  $^{13}\text{C}$  NMR (125 MHz,  $\text{CDCl}_3$ )  $\delta$  143.07, 140.57, 128.67, 128.31, 125.64, 123.11, 82.99, 47.79, 35.64, 33.58, 32.34, 32.30, 26.96, 26.58, 24.86, 24.61, 14.94.  $^{11}\text{B}$  NMR (160 MHz,  $\text{CDCl}_3$ )  $\delta$  32.78. IR (neat)  $\nu_{\text{max}}$  3084 (w), 3062 (w), 3026 (w), 2977 (m), 2924 (s), 2852 (s), 1603 (w), 1496 (w), 1480 (m), 1370 (s), 1317 (s), 1270 (m), 1215 (w), 1143 (s), 987 (m), 844 (m), 748 (m), 699 (s)  $\text{cm}^{-1}$ . HRMS (ESI+) calc. for  $\text{C}_{24}\text{H}_{38}\text{BO}_2$   $[\text{M}+\text{H}]^+$  369.2965, found 369.2965.  $[\alpha]_D^{20}$ : +10.1 ( $c = 0.955$ ,  $\text{CHCl}_3$ ,  $l = 50$  mm).

### Analysis of Stereochemistry:

The enantiomeric ratio was determined by chiral SFC analysis of the corresponding secondary allylic alcohol. The racemic alcohol was prepared analogously with racemic **L4** and the vinyl bromide **14-Br** according to *Method A*.

Chiral SFC (OD-H, Chiraldex, 3 mL/min, 6%  $i\text{PrOH}$ , 100 bar, 35  $^\circ\text{C}$ )-analysis of the reaction product.

### Racemic

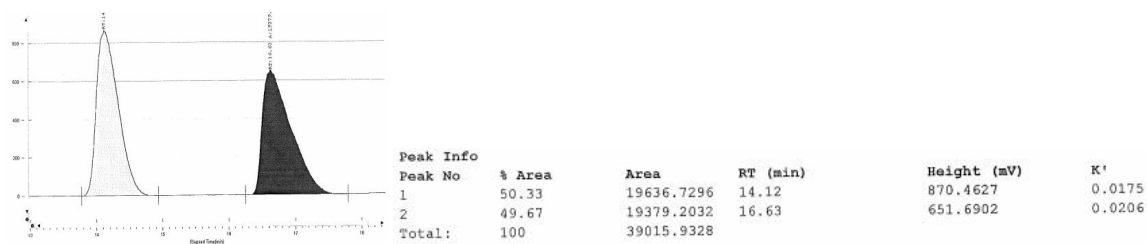

### Reaction product

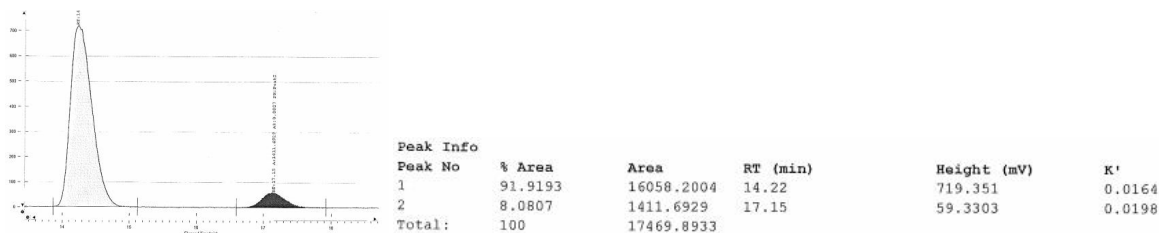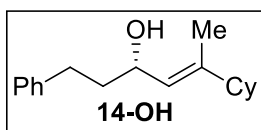

**(S,E)-5-Cyclohexyl-1-phenylhex-4-en-3-ol (14-OH)**. The reaction was performed according to the *Representative Procedure (Method E)*. The crude mixture was purified by silica gel chromatography (20% ethyl

acetate/hexanes, stain in CAM) to afford a clear, colorless oil.  $R_f = 0.6$  in 20% ethyl acetate/hexanes on TLC.  $^1\text{H NMR}$  (500 MHz,  $\text{CDCl}_3$ )  $\delta$  7.30-7.24 (m, 2H), 7.21-7.15 (m, 3H), 5.21 (d,  $J = 8.0$  Hz, 1H), 4.39 (q,  $J = 7.0$  Hz, 1H), 2.66 (m, 2H), 1.93 (ddt,  $J = 13.0, 9.5, 6.5$  Hz, 1H), 1.85 (m, 1H), 1.81-1.64 (m, 6H), 1.62 (s, 3H), 1.36-1.09 (m, 6H).  $^{13}\text{C NMR}$  (125 MHz,  $\text{CDCl}_3$ )  $\delta$  144.53, 142.26, 128.54, 128.47, 125.89, 125.88, 68.18, 47.37, 39.38, 31.99, 31.97, 26.80, 26.47, 15.19. IR (neat)  $\nu_{\text{max}}$  3329 (br), 3084 (w), 3062 (w), 3026 (w), 2924 (s), 2852 (s), 1662 (w), 1603 (w), 1495 (w), 1382 (m), 1265 (w), 1189 (w), 1052 (m), 1030 (m), 1006 (m), 746 (m), 698 (s)  $\text{cm}^{-1}$ . HRMS (ESI+) calc. for  $\text{C}_{18}\text{H}_{25}$   $[\text{M}+\text{H}-\text{H}_2\text{O}]^+$  241.1956, found 241.1951.  $[\alpha]_{\text{D}}^{20}$ : -13.8 (c = 0.600,  $\text{CHCl}_3$ ,  $l = 50$  mm).

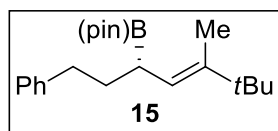

**(*S,E*)-4,4,5,5-Tetramethyl-2-(5,6,6-trimethyl-1-phenylhept-4-en-3-yl)-1,3,2-dioxaborolane (15)**. The reaction was performed according to the *Representative Procedure (Method D)*. The crude mixture was purified

by silica gel chromatography (30%  $\text{CH}_2\text{Cl}_2$ /hexanes, stain in CAM) to afford a clear, yellow oil (23.5 mg, 69% yield).  $R_f = 0.6$  in 50%  $\text{CH}_2\text{Cl}_2$ /hexanes on TLC.  $^1\text{H NMR}$  (500 MHz,  $\text{CDCl}_3$ )  $\delta$  7.27-7.21 (m, 2H), 7.17-7.12 (m, 3H), 5.11 (d,  $J = 9.0$  Hz, 1H), 2.63 (ddd,  $J = 15.0, 10.0, 5.5$  Hz, 1H), 2.53 (ddd,  $J = 13.0, 6.5, 3.0$  Hz, 1H), 1.99 (q,  $J = 8.5$  Hz, 1H), 1.85 (ddt,  $J = 13.5, 10.0, 7.0$  Hz, 1H), 1.71 (dtd,  $J = 13.5, 9.5, 5.5$  Hz, 1H), 1.59 (s, 3H), 1.21 (s, 6H), 1.20 (s, 6H).  $^{13}\text{C NMR}$  (125 MHz,  $\text{CDCl}_3$ )  $\delta$  143.03, 128.65, 128.31, 125.64, 121.72, 82.95, 36.33, 35.71, 33.57, 29.38, 24.80, 24.58, 13.50.  $^{11}\text{B NMR}$  (128 MHz,  $\text{CDCl}_3$ )  $\delta$  32.76. IR (neat)  $\nu_{\text{max}}$  3085 (w), 3062 (w), 3026 (w), 2966 (s), 2930 (s), 2861 (m), 1735 (w), 1604 (w), 1495 (w), 1478 (m), 1455 (m), 1357 (s), 1315 (s), 1263 (m), 1214 (m), 1199 (m), 1143 (s), 1106 (m), 967 (m), 847 (m), 748 (m), 698 (s)  $\text{cm}^{-1}$ . HRMS (ESI+) calc. for  $\text{C}_{22}\text{H}_{36}\text{BO}_2$   $[\text{M}+\text{H}]^+$  343.2808, found 343.2806.  $[\alpha]_{\text{D}}^{20}$ : +14.2 (c = 1.175,  $\text{CHCl}_3$ ,  $l = 50$  mm).

#### ***Analysis of Stereochemistry:***

The enantiomeric ratio was determined by chiral SFC analysis of the corresponding secondary allylic alcohol. The racemic alcohol was prepared analogously with racemic **L4** and the vinyl bromide **15-Br** according to *Method A*.

*Chiral SFC (OD-H, Chiraldex, 3 mL/min, 7%  $^i\text{PrOH}$ , 100 bar, 35  $^\circ\text{C}$ )-analysis of the reaction product.*

## Racemic

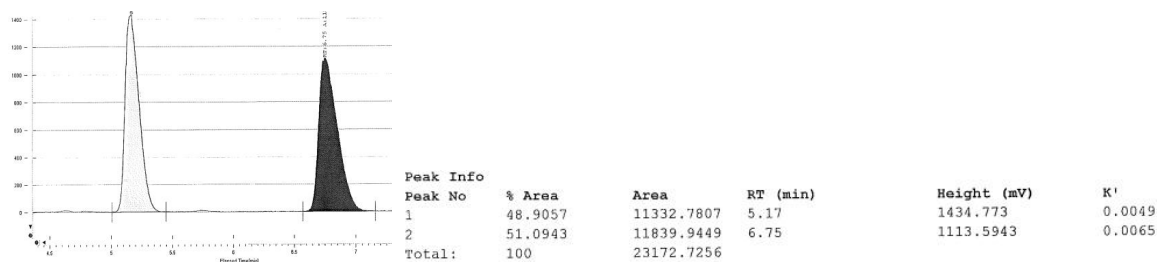

## Reaction product

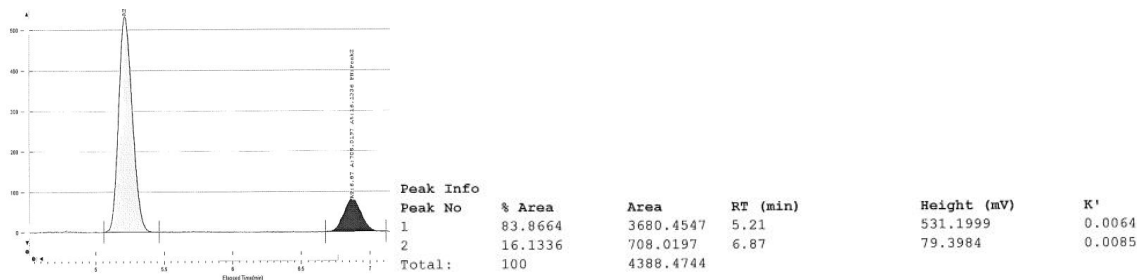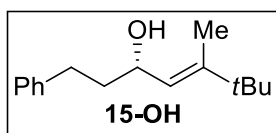

**(S,E)-5,6,6-Trimethyl-1-phenylhept-4-en-3-ol (15-OH).** The reaction was performed according to the *Representative Procedure (Method E)*. The crude mixture was purified by silica gel chromatography (20% ethyl acetate/hexanes, stain in CAM) to afford a clear, colorless oil.  $R_f = 0.4$  in 7/2/1 hexanes/ $\text{CH}_2\text{Cl}_2$ /ethyl acetate on TLC.  $^1\text{H}$  NMR (500 MHz,  $\text{CDCl}_3$ ) 7.30-7.24 (m, 2H), 7.22-7.15 (m, 3H), 5.27 (dd,  $J = 8.5, 1.0$  Hz, 1H), 4.40 (q,  $J = 7.0$  Hz, 1H), 2.74-2.60 (m, 2H), 1.94 (ddt,  $J = 13.0, 9.5, 7.0$  Hz, 1H), 1.77 (ddt,  $J = 13.5, 10.0, 6.0$  Hz, 1H), 1.65 (s, 3H), 1.05 (s, 9H).  $^{13}\text{C}$  NMR (125 MHz,  $\text{CDCl}_3$ )  $\delta$  147.00, 142.27, 128.54, 128.49, 125.90, 124.74, 68.62, 39.44, 36.28, 32.02, 29.10, 13.30. IR (neat)  $\nu_{\text{max}}$  3402 (br), 3085 (w), 3062 (w), 3026 (w), 2954 (s), 2867 (m), 1654 (w), 1603 (w), 1495 (m), 1478 (m), 1454 (m), 1377 (m), 1360 (m), 1259 (w), 1052 (m), 1071 (s), 1005 (m), 914 (w), 841 (w), 746 (m), 698 (s)  $\text{cm}^{-1}$ . HRMS (ESI+) calc. for  $\text{C}_{16}\text{H}_{23}$   $[\text{M}+\text{H}-\text{H}_2\text{O}]^+$  215.1800, found 215.1807.  $[\alpha]_{\text{D}}^{20}$ : -22.5 ( $c = 0.485$ ,  $\text{CHCl}_3$ ,  $l = 50$  mm).

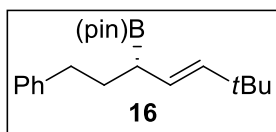

**(S,E)-2-(6,6-Dimethyl-1-phenylhept-4-en-3-yl)-4,4,5,5-tetramethyl-1,3,2-dioxaborolane (16).** The reaction was performed according to the *Representative Procedure (Method D)*. The crude mixture was purified by silica gel chromatography (30%  $\text{CH}_2\text{Cl}_2$ /hexanes, stain in CAM) to afford a white solid (24.6 mg, 75% yield).  $R_f = 0.6$  in 7:2:1 hexanes/ $\text{CH}_2\text{Cl}_2$ /ethyl acetate on TLC.  $^1\text{H}$  NMR (500 MHz,

CDCl<sub>3</sub>) δ 7.28-7.23 (m, 2H) 7.19 – 7.13 (m, 3H), 5.47 (dd, *J* = 15.5, 1.0 Hz, 1H), 5.26 (dd, *J* = 15.5, 8.5 Hz, 1H), 2.63 (ddd, *J* = 14.0, 9.5, 5.5 Hz, 1H) 2.55 (ddd, *J* = 13.5, 10.0, 5.5 Hz, 1H), 1.88-1.75 (m, 2H), 1.70 (ddt, *J* = 12.0, 6.0, 4.5 Hz, 1H) 1.24 (s, 6H), 1.23 (s, 6H), 0.99 (s, 9H) .  
<sup>13</sup>C NMR (126 HMz, CDCl<sub>3</sub>) δ 143.06, 141.70, 128.66, 128.34, 125.67, 124.94, 83.15, 35.52, 33.15, 33.09, 30.07, 24.88, 24.66. <sup>11</sup>B NMR (160 MHz, CDCl<sub>3</sub>) δ 33.01. IR (neat) ν<sub>max</sub> 3085 (w), 3063 (w), 3026 (w), 2976 (s), 2957 (s), 2930 (s), 2862 (m), 1604 (w), 1496 (w), 1456 (m), 1360 (s), 1320 (s), 1266 (m), 1214 (m), 1143 (s), 1108 (w), 970 (s), 854 (m), 747 (m), 699 (s) cm<sup>-1</sup>. HRMS (ESI+) calc. for C<sub>21</sub>H<sub>34</sub>BO<sub>2</sub> [M+H]<sup>+</sup> 329.2652, found 329.2661. [α]<sub>D</sub><sup>20</sup>: +10.6 (c = 0.665, CHCl<sub>3</sub>, *l*=50 mm). Melting point: 48-51 °C.

### Analysis of Stereochemistry:

The enantiomeric ratio was determined by chiral SFC analysis of the corresponding secondary allylic alcohol. The racemic alcohol was prepared analogously with racemic **L4** and the vinyl bromide **16-Br** according to *Method A*.

*Chiral SFC (OD-H, Chiraldex, 3 mL/min, 7% <sup>i</sup>PrOH, 100 bar, 35 °C)-analysis of the reaction product.*

#### Racemic

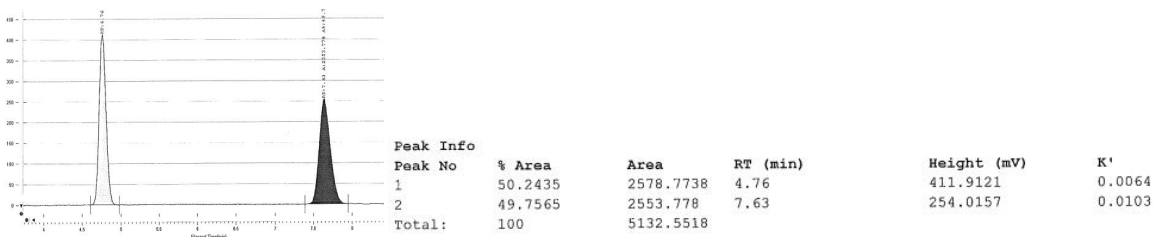

#### Reaction product

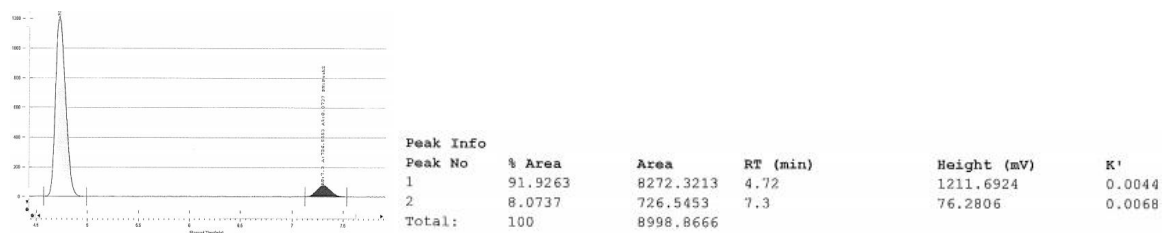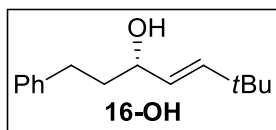

**(*S,E*)-6,6-Dimethyl-1-phenylhept-4-en-3-ol (16-OH)**. The reaction was performed according to the *Representative Procedure (Method E)*. The crude mixture was purified by silica gel chromatography (20% ethyl acetate/hexanes, stain in CAM) to afford a clear, colorless oil. *R*<sub>f</sub> = 0.5 in 7/2/1

hexanes/CH<sub>2</sub>Cl<sub>2</sub>/ethyl acetate on TLC. <sup>1</sup>H NMR (500 MHz, CDCl<sub>3</sub>) δ 7.30-7.24 (m, 2H), 7.22-7.16 (m, 3H), 5.67 (d, *J* = 15.5 Hz, 1H), 5.39 (dd, *J* = 15.5, 7.0 Hz, 1H), 4.10-4.04 (m, 1H), 2.75-2.62 (m, 2H), 1.93-1.76 (m, 2H), 1.45 (d, *J* = 3.0 Hz, 1H), 1.02 (s, 9H). <sup>13</sup>C NMR (125 MHz, CDCl<sub>3</sub>) δ 143.56, 142.19, 128.60, 128.50, 127.64, 125.92, 72.83, 39.07, 32.95, 31.99, 29.67. IR (neat) ν<sub>max</sub> 3356 (br), 3085 (w), 3062 (w), 3026 (w), 2956 (s), 2863 (s), 1661 (w), 1603 (w), 1496 (m), 1455 (m), 1390 (w), 1362 (m), 1267 (w), 1202 (w), 1100 (w), 1031 (m), 973 (s), 911 (m), 746 (s), 698 (s) cm<sup>-1</sup>. HRMS (ESI+) calc. for C<sub>15</sub>H<sub>21</sub> [M+H-H<sub>2</sub>O]<sup>+</sup> 201.1643, found 201.1632. [α]<sub>D</sub><sup>20</sup>: -7.94 (c = 0.500, CHCl<sub>3</sub>, *l* = 50 mm). The absolute stereochemistry was assigned by comparing the optical rotation with a reported value in the literature for (*S*)-**16-OH**, [α]<sub>D</sub><sup>20</sup>: -7.5 (c = 0.96, CHCl<sub>3</sub>, 91:9 er).<sup>16</sup>

### VIII. Further Transformations of Allylic Boronate **12**

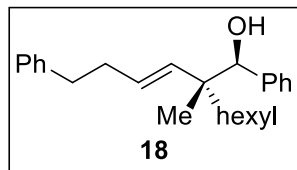

**(1*R*,2*R*)-2-Methyl-1-phenyl-2-((*E*)-4-phenylbut-1-en-1-yl)octan-1-ol (**18**)**. After performing the enantiotopic-group-selective cross-coupling (*Method D*), the crude mixture containing **12** was diluted with Et<sub>2</sub>O (3 mL) and filtered through Celite with additional Et<sub>2</sub>O (5 mL).

The solvent was removed *in vacuo* and the crude residue transferred to a 2-dram vial with Et<sub>2</sub>O. The solvent was again removed under vacuum, and the vial equipped with a magnetic stir bar. After purging with N<sub>2</sub>, toluene (500 μL) was added. The reaction was stirred and benzaldehyde (50 μL, 0.5 mmol) was added. The reaction was heated to 60°C for 24 hours under N<sub>2</sub>. Upon cooling to room temperature, the reaction was diluted with Et<sub>2</sub>O (3 mL) and filtered through a short pad of Celite with additional Et<sub>2</sub>O (5 mL). To simplify purification, the residue was further oxidized according to *Method E* and the title compound was obtained by silica gel chromatography (30% CH<sub>2</sub>Cl<sub>2</sub>/hexanes) as a clear, colorless oil (28.0 mg, 80% yield). R<sub>f</sub> = 0.4 in 50% CH<sub>2</sub>Cl<sub>2</sub>/hexanes on TLC. <sup>1</sup>H NMR (500 MHz, CDCl<sub>3</sub>) δ 7.30-7.63 (m, 10H), 5.47 (dt, *J* = 15.5, 6.5 Hz, 1H), 5.34 (d, *J* = 16.0 Hz, 1H), 4.29 (s, 1H), 2.74 (t, *J* = 7.5 Hz, 2H), 2.44 (q, *J* = 7.0 Hz, 2H), 1.88 (s, 1H), 1.36-1.04 (m, 10H), 0.87 (t, *J* = 7.0 Hz, 3H), 0.83 (s, 3H). <sup>13</sup>C NMR (125 MHz, CDCl<sub>3</sub>) δ 141.84, 140.73, 136.74, 130.86, 128.62, 128.51, 128.22, 127.49, 127.36, 126.06, 80.32, 45.24, 38.07, 36.06, 34.89, 32.03, 30.24, 24.15, 22.82, 17.28, 14.22. IR (neat) ν<sub>max</sub>

<sup>16</sup> Sprout, C. M.; Richmond, M. L.; Seto, C. T. *J. Org. Chem.* **2005**, *70*, 7408.

3453 (br), 3085 (w), 3062 (w), 3027 (w), 2954 (m), 2927 (s), 2856 (m), 1495 (w), 1453 (m), 1377 (w), 1037 (m), 981 (m), 745 (s), 699 (s)  $\text{cm}^{-1}$ . HRMS (ESI+) calc. for  $\text{C}_{25}\text{H}_{33}$   $[\text{M}+\text{H}-\text{H}_2\text{O}]^+$  333.2582, found 333.2576.  $[\alpha]_{\text{D}}^{20}$ : +34.1 ( $c = 1.19$ ,  $\text{CHCl}_3$ ,  $l = 50$  mm).

### Analysis of Stereochemistry:

The enantiomeric ratio was determined by chiral SFC analysis. The racemic alcohol was prepared analogously with racemic **L4**.

Chiral SFC (OJ-H, Chiraldex, 3 mL/min, 7%  $i\text{PrOH}$ , 100 bar, 35  $^{\circ}\text{C}$ )-analysis of the reaction product.

#### Racemic

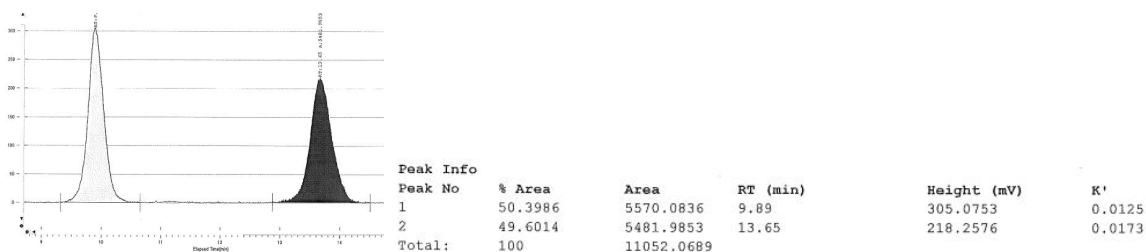

#### Reaction product

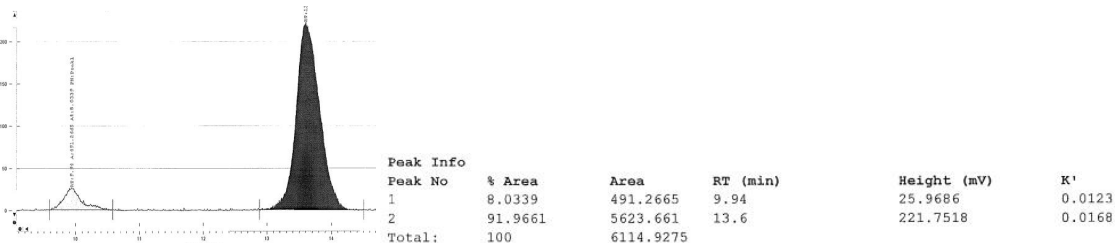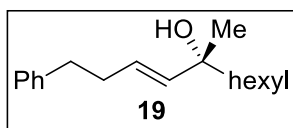

(*R,E*)-5-methyl-1-phenylundec-3-en-5-ol (**19**).<sup>17</sup> After performing the enantiotopic-group-selective cross-coupling (*Method D*), the crude mixture containing **12** was diluted with  $\text{Et}_2\text{O}$  (3 mL) and filtered

through Celite with additional  $\text{Et}_2\text{O}$  (5 mL). The solvent was removed in vacuo and the crude residue transferred to a 2-dram vial with  $\text{Et}_2\text{O}$ . The solvent was again removed under vacuum, and the vial equipped with a magnetic stir bar. After purging with  $\text{N}_2$ , THF (1 mL) was added and the reaction was cooled to  $0^{\circ}\text{C}$ . Nitrobenzene (32.1 mg, 0.30 mmol) was added as a solution in THF (1 mL) via syringe. The reaction was warmed to room temperature and stirred under  $\text{N}_2$  for one hour. The reaction was re-cooled to  $0^{\circ}\text{C}$  and 3M  $\text{NH}_4\text{OH}_{(\text{aq})}$  (500  $\mu\text{L}$ , 1.6 mmol) was

<sup>17</sup> Kyne, R. E.; Ryan, M. C.; Klیمان, L. T.; Morken, J. P. *Org. Lett.* **2010**, *12*, 3796.

added. The reaction was warmed to room temperature and stirred under N<sub>2</sub> for 16 hours. To quench, the reaction was diluted with Et<sub>2</sub>O (3 mL) and filtered through a plug of silica with additional Et<sub>2</sub>O (5 mL). The solvent was removed under vacuum. To simplify purification, the crude residue was further oxidized according to *Method E*, and the title compound was obtained by silica gel chromatography (20% CH<sub>2</sub>Cl<sub>2</sub>/hexanes to 40% CH<sub>2</sub>Cl<sub>2</sub>/hexanes) as a clear, yellow oil (16.4 mg). R<sub>f</sub> = 0.3 in 50% CH<sub>2</sub>Cl<sub>2</sub>/hexanes on TLC. <sup>1</sup>H NMR (500 MHz, CDCl<sub>3</sub>) δ 7.29-7.25 (m, 2H), 7.20-7.15 (m, 3H), 5.63 (dtd, *J* = 15.5, 6.5, 2.0 Hz, 1H), 5.51 (dd, *J* = 15.5, 1.5 Hz, 1H), 2.70 (t, *J* = 8.0 Hz, 2H), 2.36 (ddd, *J* = 15.5, 8.0, 1.0 Hz, 2H), 1.46 (m, 2H), 1.32-1.20 (m, 12H), 0.89 (t, *J* = 6.0 Hz, 3H). <sup>13</sup>C NMR (125 MHz, CDCl<sub>3</sub>) δ 141.96, 137.96, 128.62, 128.39, 126.96, 125.92, 72.92, 43.00, 36.00, 34.19, 31.96, 29.88, 28.08, 24.10, 22.78, 14.22. IR (neat) ν<sub>max</sub> 3470 (br), 3026 (w), 2956 (m), 2928 (s), 2856 (m), 1454 (m), 1375 (w), 971 (m), 746 (m), 698 (s) cm<sup>-1</sup>. HRMS (ESI+) calc. for C<sub>18</sub>H<sub>27</sub> [M+H-H<sub>2</sub>O]<sup>+</sup> 243.2113, found 243.2102. [α]<sub>D</sub><sup>20</sup>: -0.704 (c = 0.690, CHCl<sub>3</sub>, *l* = 50 mm).

### Analysis of Stereochemistry:

The enantiomeric ratio was determined by chiral SFC analysis. The racemic alcohol was prepared analogously with racemic **L4**.

*Chiral SFC (OD-H, Chiraldex, 3 mL/min, 5% <sup>i</sup>PrOH, 100 bar, 35 °C)-analysis of the reaction product.*

#### Racemic

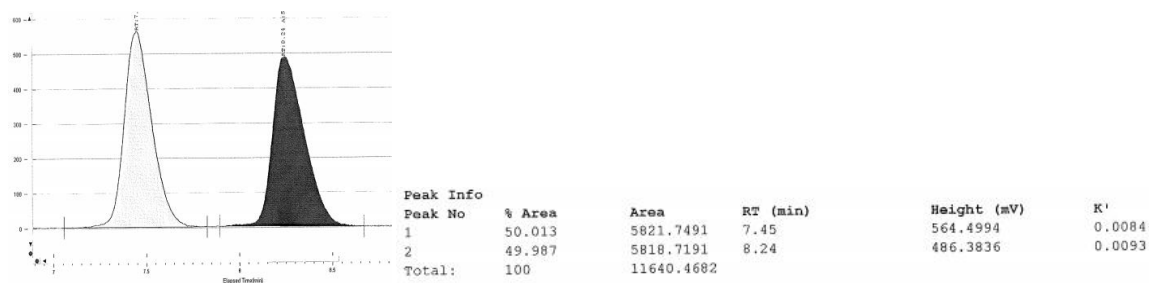

#### Reaction product

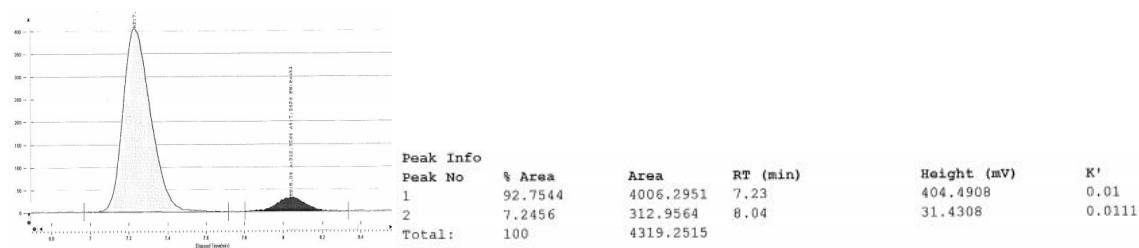

**IX. Structure Proof of 19:**

The absolute structure of **19** was determined by ozonolysis/reduction to **19-Diol**, and subsequent comparison with the Sharpless Asymmetric Dihydroxylation<sup>18</sup> product of 2-methyloct-1-ene, which is known to afford the (*R*) isomer utilizing AD-mix- $\beta$ .<sup>19</sup> Racemic **19-Diol** was prepared according to a literature precedent.<sup>20</sup>

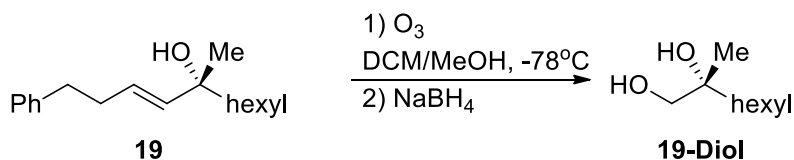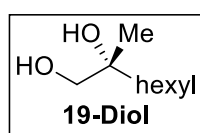

**(*R*)-2-Methyloctane-1,2-diol (19-OH).** A 4-dram vial was charged with **19**

(55 mg, 0.21 mmol), CH<sub>2</sub>Cl<sub>2</sub> (2 mL), and MeOH (2 mL). The reaction was stirred and cooled to -78°C. A stream of O<sub>3</sub> was bubbled into the reaction for approximately 3 minutes as the color changed from bright yellow to redish brown. NaBH<sub>4</sub> (76 mg, 2.0 mmol) was added as a solid. The reaction stirred at -78°C for 5 minutes before warming to room temperature and further stirring for 12 hours. H<sub>2</sub>O (2 mL) was added and the reaction was poured into a separatory funnel with ethyl acetate (10 mL). The layers were separated and the aqueous layer was extracted with ethyl acetate (4 x 10 mL). The organic layers were combined, dried over Na<sub>2</sub>SO<sub>4(s)</sub>, filtered and concentrated *in vacuo*. The crude material was purified by silica gel chromatography (20% ethyl acetate/hexanes to 30% ethyl acetate/hexanes) to afford the title compound as a clear, colorless oil (11.7 mg, 38% yield). R<sub>f</sub> = 0.3 in 50% ethyl acetate/hexanes on TLC. The spectral data matched those reported in the literature.<sup>21</sup>

**Analysis of Stereochemistry:**

The enantiomeric ratio was determined by chiral GC analysis of the corresponding acetone which was prepared as follows: The diol was combined with dimethoxypropane (1 mL) and a single crystal of pTsOH, and heated to 60°C for 20 minutes. The reaction was cooled to room temperature, filtered through a pad of silica gel with ether (5 mL), and concentrated *in vacuo* to afford pure acetone.

<sup>18</sup> Sharpless, K. B.; Amberg, W.; Bennani, Y. L.; Crispino, G. A.; Hartung, J.; Jeong, K.; Kwong, H.; Morikawa, K.; Wang, Z.; Xu, D.; Zhang, X. *J. Org. Chem.* **1992**, *57*, 2768.

<sup>19</sup> Arasaki, H.; Iwata, M.; Nishimura, D.; Itoh, A.; Masaki, Y. *Synlett* **2004**, *3*, 546.

<sup>20</sup> Albert, B. J.; Sivaramakrishnan, A.; Naka, T.; Czaicki, N.L.; Koide, K. *J. Am. Chem. Soc.* **2007**, *129*, 2648.

<sup>21</sup> Park, J.; Pedersen, S. F. *Tetrahedron*, **1992**, *48*, 2069.



Chiral GC ( $\beta$ -Dex 120, Supelco, 100°C for 5 minutes, then ramp 1.0°C/min, 20 psi)-analysis of the reaction product.

Racemic

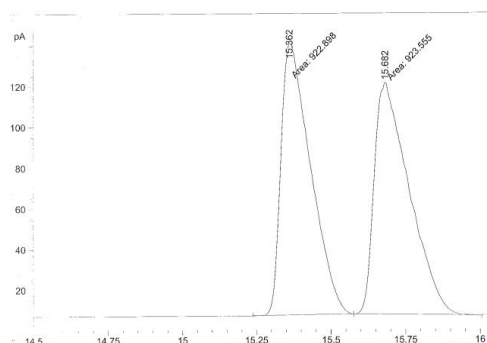

| Peak # | RetTime [min] | Type | Width [min] | Area [pA*s] | Height [pA] | Area %   |
|--------|---------------|------|-------------|-------------|-------------|----------|
| 1      | 15.362        | MM   | 0.1151      | 922.89752   | 133.61723   | 49.98220 |
| 2      | 15.682        | MM   | 0.1352      | 923.55469   | 113.86636   | 50.01780 |

(R)-Isomer from AD-mix- $\beta$

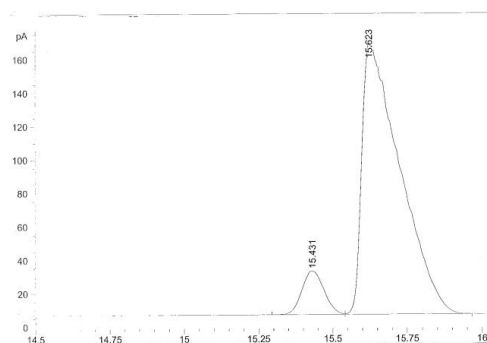

| Peak # | RetTime [min] | Type | Width [min] | Area [pA*s] | Height [pA] | Area %   |
|--------|---------------|------|-------------|-------------|-------------|----------|
| 1      | 15.431        | BV   | 0.0632      | 136.16568   | 25.97442    | 8.67880  |
| 2      | 15.623        | VB   | 0.1052      | 1432.77991  | 162.38312   | 91.32120 |

Reaction Product 19-Diol

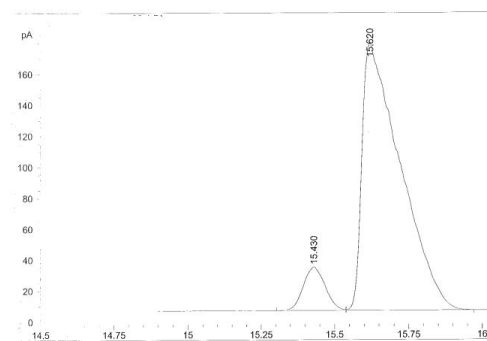

| Peak # | RetTime [min] | Type | Width [min] | Area [pA*s] | Height [pA] | Area %   |
|--------|---------------|------|-------------|-------------|-------------|----------|
| 1      | 15.430        | BV   | 0.0635      | 143.93559   | 28.23802    | 8.48570  |
| 2      | 15.620        | VB   | 0.1056      | 1552.27844  | 173.48526   | 91.51430 |

## X. Cross-Coupling of (*S*)-<sup>10</sup>B-20

(*S*)-<sup>10</sup>B-20 was prepared according to a literature procedure.<sup>1</sup>

### A. Using (*S,R*)-Complex and assuming inversion during coupling:

note: bis(boronate) starting material ((*S*)-<sup>10</sup>B-20) = 98:2 er  
 cross-coupling reaction selectivity = 93:7 er  
 natural abundance of boron is <sup>10</sup>B:<sup>11</sup>B = 19.9:80.1

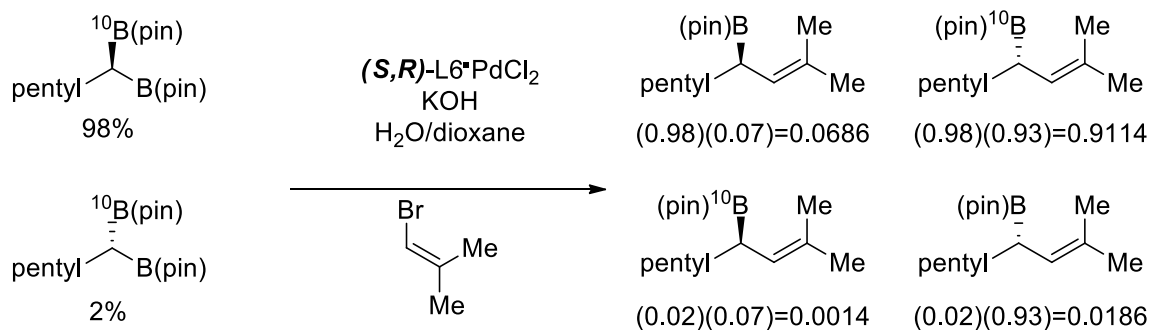

$$^{10}\text{B} = (0.199)(0.0686) + 0.9114 + 0.0014 + (0.199)(0.0186) = 0.930$$

$$^{11}\text{B} = (0.801)(0.0686) + (0.801)(0.0186) = 0.070$$

Relative [M+H] distributions for <sup>10</sup>B:

|                                                                                                                 |       |       |
|-----------------------------------------------------------------------------------------------------------------|-------|-------|
| <sup>12</sup> C <sub>16</sub> H <sub>32</sub> <sup>10</sup> BO <sub>2</sub> [M+H]:                              | 266.3 | 0.842 |
| <sup>12</sup> C <sub>15</sub> <sup>13</sup> CH <sub>32</sub> <sup>10</sup> BO <sub>2</sub> [M+H]:               | 267.3 | 0.146 |
| <sup>12</sup> C <sub>14</sub> <sup>13</sup> C <sub>2</sub> H <sub>32</sub> <sup>10</sup> BO <sub>2</sub> [M+H]: | 268.3 | 0.012 |

Relative [M+H] distributions for <sup>11</sup>B:

|                                                                                                                 |       |       |
|-----------------------------------------------------------------------------------------------------------------|-------|-------|
| <sup>12</sup> C <sub>16</sub> H <sub>32</sub> <sup>11</sup> BO <sub>2</sub> [M+H]:                              | 267.3 | 0.842 |
| <sup>12</sup> C <sub>15</sub> <sup>13</sup> CH <sub>32</sub> <sup>11</sup> BO <sub>2</sub> [M+H]:               | 268.3 | 0.146 |
| <sup>12</sup> C <sub>14</sub> <sup>13</sup> C <sub>2</sub> H <sub>32</sub> <sup>11</sup> BO <sub>2</sub> [M+H]: | 269.3 | 0.012 |

Calculated Relative Intensities

$$[\text{M}+\text{H}] \text{ for } 266.3 \text{ amu} = (0.930)(0.842) = 0.783$$

$$[\text{M}+\text{H}] \text{ for } 267.3 \text{ amu} = (0.930)(0.146) + (0.070)(0.842) = 0.195$$

$$[\text{M}+\text{H}] \text{ for } 268.3 \text{ amu} = (0.930)(0.012) + (0.070)(0.146) = 0.021$$

$$[\text{M}+\text{H}] \text{ for } 269.3 \text{ amu} = (0.070)(0.012) = 0.001$$

Found: 0.783

Found: 0.195

Found: 0.021

Found: <0.01

9/11/2014

File: bp-V-293-2

Printed by: BOSTON COLLEGE

Ionization mode: ESI+

Sample:

Date Run: 9/3/2014 (12:29:19)

Run By:

Instrument: AccuTOF

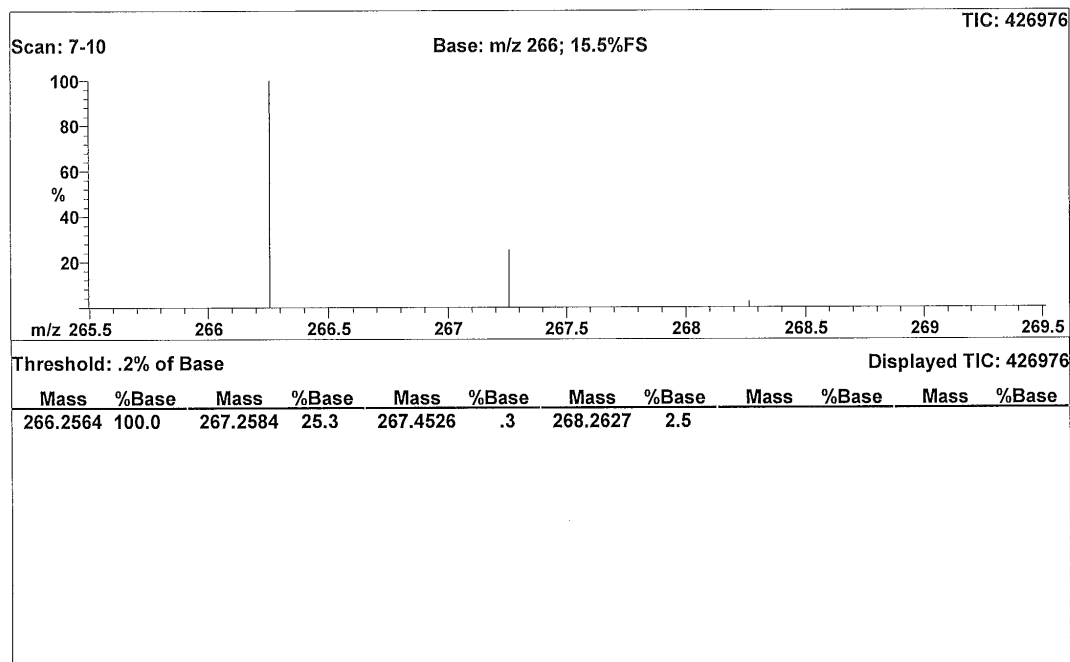

Spectrum 1: Mass Spectrum corresponding to the cross-coupling of (*S*)-<sup>10</sup>B-20 with (*S,R*)-L6PdCl<sub>2</sub> as described in Part A of Section X.

**B. Using (R,S)-Complex assuming inversion during coupling:**

note: bis(boronate) starting material ((S)-<sup>10</sup>B-20) = 98:2 er  
 cross-coupling reaction selectivity = 93:7 er  
 natural abundance of boron is <sup>10</sup>B:<sup>11</sup>B = 19.9:80.1

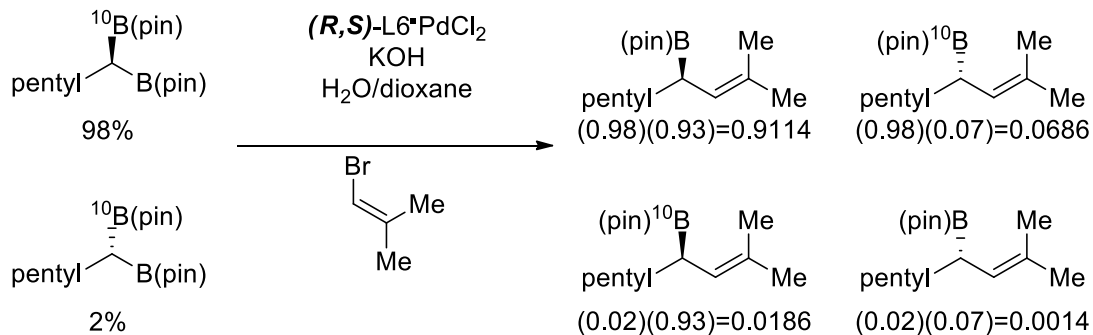

$$^{10}\text{B} = (0.199)(0.9114) + 0.0686 + 0.0186 + (0.199)(0.0014) = 0.269$$

$$^{11}\text{B} = (0.801)(0.9114) + (0.801)(0.0014) = 0.731$$

Relative [M+H] distributions for <sup>10</sup>B:

$$^{12}\text{C}_{16}\text{H}_{32}^{10}\text{BO}_2 \text{ [M+H]: } \quad 266.3 \quad 0.842$$

$$^{12}\text{C}_{15}^{13}\text{CH}_{32}^{10}\text{BO}_2 \text{ [M+H]: } \quad 267.3 \quad 0.146$$

$$^{12}\text{C}_{14}^{13}\text{C}_2\text{H}_{32}^{10}\text{BO}_2 \text{ [M+H]: } \quad 268.3 \quad 0.012$$

Relative [M+H] distributions for <sup>11</sup>B:

$$^{12}\text{C}_{16}\text{H}_{32}^{11}\text{BO}_2 \text{ [M+H]: } \quad 267.3 \quad 0.842$$

$$^{12}\text{C}_{15}^{13}\text{CH}_{32}^{11}\text{BO}_2 \text{ [M+H]: } \quad 268.3 \quad 0.146$$

$$^{12}\text{C}_{14}^{13}\text{C}_2\text{H}_{32}^{11}\text{BO}_2 \text{ [M+H]: } \quad 269.3 \quad 0.012$$

Calculated Relative Intensities

$$[\text{M+H}] \text{ for } 266.3 \text{ amu} = (0.269)(0.842) = 0.226$$

$$[\text{M+H}] \text{ for } 267.3 \text{ amu} = (0.269)(0.146) + (0.731)(0.842) = 0.655$$

$$[\text{M+H}] \text{ for } 268.3 \text{ amu} = (0.269)(0.012) + (0.731)(0.146) = 0.110$$

$$[\text{M+H}] \text{ for } 269.3 \text{ amu} = (0.731)(0.012) = 0.009$$

Found: 0.269

Found: 0.623

Found: 0.101

Found: 0.007

9/11/2014

File: bp-V-294-2

Printed by: BOSTON COLLEGE

Ionization mode: ESI+

Sample:

Date Run: 9/3/2014 (12:35:29)

Run By:

Instrument: AccuTOF

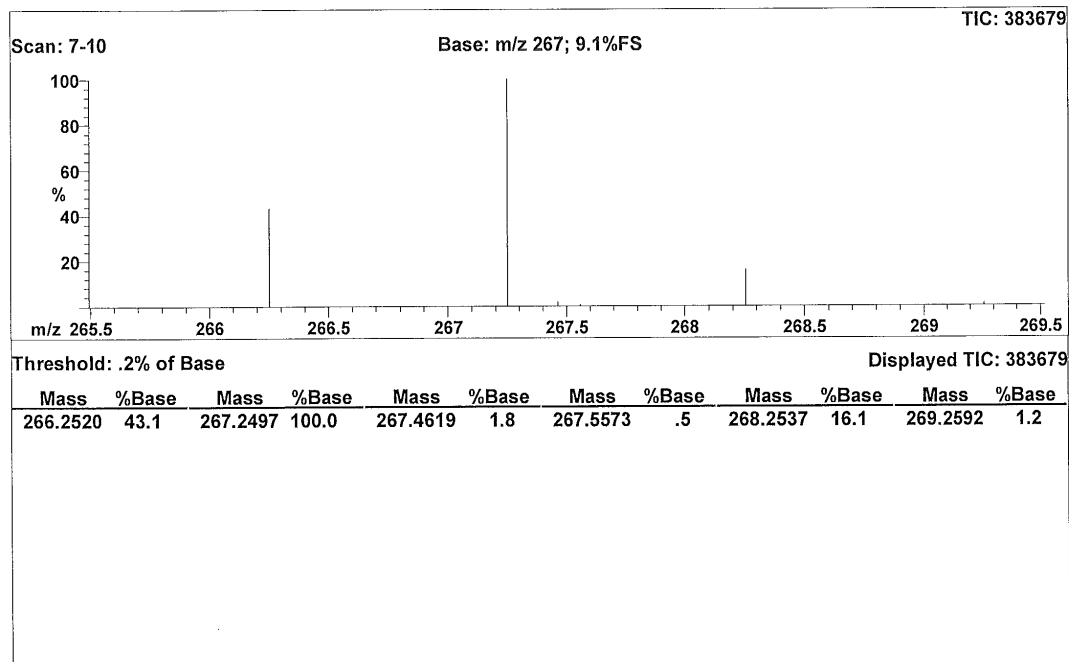

Spectrum 2: Mass Spectrum corresponding to the cross-coupling of (*S*)-<sup>10</sup>B-20 with (*R,S*)- L6·PdCl<sub>2</sub> as described in Part B of Section X.

## XI. X-Ray Crystallographic Data for L6PdCl<sub>2</sub>

Table 1. Crystal data and structure refinement for C<sub>34</sub>H<sub>38</sub>Cl<sub>2</sub>F<sub>6</sub>FeP<sub>2</sub>Pd(CH<sub>2</sub>Cl<sub>2</sub>)

|                                   |                                                                                                                      |                  |
|-----------------------------------|----------------------------------------------------------------------------------------------------------------------|------------------|
| Identification code               | C <sub>34</sub> H <sub>38</sub> Cl <sub>2</sub> F <sub>6</sub> FeP <sub>2</sub> Pd(CH <sub>2</sub> Cl <sub>2</sub> ) |                  |
| Empirical formula                 | C <sub>35</sub> H <sub>40</sub> Cl <sub>4</sub> F <sub>6</sub> Fe P <sub>2</sub> Pd                                  |                  |
| Formula weight                    | 940.66                                                                                                               |                  |
| Temperature                       | 100(2) K                                                                                                             |                  |
| Wavelength                        | 0.71073 Å                                                                                                            |                  |
| Crystal system                    | Monoclinic                                                                                                           |                  |
| Space group                       | P2 <sub>1</sub> /c                                                                                                   |                  |
| Unit cell dimensions              | a = 20.260(3) Å                                                                                                      | a = 90°.         |
|                                   | b = 13.910(2) Å                                                                                                      | b = 102.459(4)°. |
|                                   | c = 29.599(4) Å                                                                                                      | g = 90°.         |
| Volume                            | 8145(2) Å <sup>3</sup>                                                                                               |                  |
| Z                                 | 8                                                                                                                    |                  |
| Density (calculated)              | 1.534 Mg/m <sup>3</sup>                                                                                              |                  |
| Absorption coefficient            | 1.190 mm <sup>-1</sup>                                                                                               |                  |
| F(000)                            | 3792                                                                                                                 |                  |
| Crystal size                      | 0.600 x 0.340 x 0.160 mm <sup>3</sup>                                                                                |                  |
| Theta range for data collection   | 1.555 to 28.336°.                                                                                                    |                  |
| Index ranges                      | -26 ≤ h ≤ 26, -18 ≤ k ≤ 18, 0 ≤ l ≤ 39                                                                               |                  |
| Reflections collected             | 39439                                                                                                                |                  |
| Independent reflections           | 39439 [R(int) = 0.0659]                                                                                              |                  |
| Completeness to theta = 25.242°   | 100.0 %                                                                                                              |                  |
| Absorption correction             | Semi-empirical from equivalents                                                                                      |                  |
| Max. and min. transmission        | 0.7456 and 0.4921                                                                                                    |                  |
| Refinement method                 | Full-matrix least-squares on F <sup>2</sup>                                                                          |                  |
| Data / restraints / parameters    | 39439 / 27 / 918                                                                                                     |                  |
| Goodness-of-fit on F <sup>2</sup> | 1.027                                                                                                                |                  |
| Final R indices [I > 2σ(I)]       | R1 = 0.0432, wR2 = 0.0993                                                                                            |                  |
| R indices (all data)              | R1 = 0.0555, wR2 = 0.1071                                                                                            |                  |
| Extinction coefficient            | na                                                                                                                   |                  |
| Largest diff. peak and hole       | 1.309 and -1.052 e.Å <sup>-3</sup>                                                                                   |                  |

Table 2. Atomic coordinates ( $\times 10^4$ ) and equivalent isotropic displacement parameters ( $\text{\AA}^2 \times 10^3$ ) for  $\text{C}_{34}\text{H}_{38}\text{Cl}_2\text{F}_6\text{FeP}_2\text{Pd}(\text{CH}_2\text{Cl}_2)$ .  $U(\text{eq})$  is defined as one third of the trace of the orthogonalized  $U^{ij}$  tensor.

|       | x       | y        | z       | U(eq) |
|-------|---------|----------|---------|-------|
| Pd(1) | 6960(1) | 3474(1)  | 6438(1) | 10(1) |
| Fe(1) | 4596(1) | 1943(1)  | 5722(1) | 12(1) |
| Cl(1) | 7967(1) | 2968(1)  | 6229(1) | 21(1) |
| Cl(2) | 7684(1) | 4167(1)  | 7091(1) | 19(1) |
| P(1)  | 6275(1) | 3079(1)  | 5722(1) | 10(1) |
| P(2)  | 6100(1) | 3838(1)  | 6784(1) | 9(1)  |
| F(1)  | 4653(5) | 8160(6)  | 6138(3) | 12(2) |
| F(2)  | 5727(3) | 8511(5)  | 6269(3) | 18(1) |
| F(3)  | 5194(5) | 8493(6)  | 6845(3) | 20(2) |
| F(1X) | 4566(8) | 8143(13) | 6203(6) | 24(5) |
| F(2X) | 5626(7) | 8417(9)  | 6120(5) | 27(4) |
| F(3X) | 5342(7) | 8594(9)  | 6771(5) | 22(3) |
| F(1Y) | 4789(7) | 8150(11) | 6050(5) | 31(5) |
| F(2Y) | 5766(6) | 8584(9)  | 6424(5) | 25(3) |
| F(3Y) | 4993(8) | 8414(11) | 6807(5) | 31(4) |
| F(4)  | 6736(2) | 3840(2)  | 9136(1) | 28(1) |
| F(5)  | 7643(1) | 3182(2)  | 9012(1) | 33(1) |
| F(6)  | 6761(2) | 2310(2)  | 9004(1) | 32(1) |
| C(1)  | 4887(2) | 516(3)   | 5748(2) | 22(1) |
| C(2)  | 4377(2) | 693(3)   | 5341(2) | 24(1) |
| C(3)  | 3792(2) | 1042(3)  | 5488(2) | 23(1) |
| C(4)  | 3942(2) | 1083(3)  | 5980(2) | 20(1) |
| C(5)  | 4625(2) | 747(3)   | 6143(2) | 21(1) |
| C(6)  | 5370(2) | 2937(3)  | 5717(1) | 10(1) |
| C(7)  | 4830(2) | 3009(3)  | 5306(1) | 14(1) |
| C(8)  | 4211(2) | 3223(3)  | 5445(1) | 13(1) |
| C(9)  | 4346(2) | 3262(3)  | 5941(1) | 13(1) |
| C(10) | 5057(2) | 3069(3)  | 6113(1) | 10(1) |
| C(11) | 6298(2) | 4213(3)  | 5361(1) | 13(1) |
| C(12) | 6039(2) | 4083(3)  | 4834(1) | 16(1) |
| C(13) | 5859(2) | 4973(3)  | 5534(1) | 14(1) |

*Potter, Szymaniak, Edelstein & Morken, Supporting Information*

|       |          |          |         |       |
|-------|----------|----------|---------|-------|
| C(14) | 7033(2)  | 4597(3)  | 5453(2) | 18(1) |
| C(15) | 6541(2)  | 1986(3)  | 5415(1) | 13(1) |
| C(16) | 5959(2)  | 1645(3)  | 5021(2) | 19(1) |
| C(17) | 6696(2)  | 1197(3)  | 5791(2) | 20(1) |
| C(18) | 7168(2)  | 2153(3)  | 5207(2) | 18(1) |
| C(19) | 5386(2)  | 2990(3)  | 6622(1) | 12(1) |
| C(20) | 4874(2)  | 3014(3)  | 6942(1) | 15(1) |
| C(21) | 5795(2)  | 5078(3)  | 6703(1) | 12(1) |
| C(22) | 5123(2)  | 5312(3)  | 6504(1) | 14(1) |
| C(23) | 4942(2)  | 6278(3)  | 6415(1) | 16(1) |
| C(24) | 5428(2)  | 6991(3)  | 6525(2) | 16(1) |
| C(25) | 6099(2)  | 6759(3)  | 6738(2) | 18(1) |
| C(26) | 6281(2)  | 5798(3)  | 6821(1) | 16(1) |
| C(27) | 5247(2)  | 8035(3)  | 6434(2) | 25(1) |
| C(28) | 6349(2)  | 3675(3)  | 7412(1) | 11(1) |
| C(29) | 6217(2)  | 4364(3)  | 7724(1) | 16(1) |
| C(30) | 6411(2)  | 4201(3)  | 8200(1) | 18(1) |
| C(31) | 6726(2)  | 3346(3)  | 8366(1) | 15(1) |
| C(32) | 6850(2)  | 2645(3)  | 8054(1) | 17(1) |
| C(33) | 6665(2)  | 2808(3)  | 7583(1) | 16(1) |
| C(34) | 6960(2)  | 3176(3)  | 8876(1) | 19(1) |
| Pd(2) | 7665(1)  | 8483(1)  | 8316(1) | 13(1) |
| Fe(2) | 10193(1) | 9582(1)  | 8714(1) | 17(1) |
| Cl(3) | 6828(1)  | 9468(1)  | 8531(1) | 20(1) |
| Cl(4) | 6780(1)  | 7663(1)  | 7814(1) | 23(1) |
| P(3)  | 8512(1)  | 8923(1)  | 8952(1) | 14(1) |
| P(4)  | 8363(1)  | 7748(1)  | 7923(1) | 13(1) |
| F(7)  | 9760(4)  | 3357(5)  | 8522(3) | 26(2) |
| F(8)  | 9098(4)  | 3090(5)  | 7841(3) | 21(2) |
| F(9)  | 8702(4)  | 2986(5)  | 8475(3) | 26(2) |
| F(7X) | 9558(7)  | 3367(9)  | 8672(5) | 46(3) |
| F(8X) | 9281(6)  | 3111(7)  | 7977(4) | 24(2) |
| F(9X) | 8482(6)  | 2986(8)  | 8348(5) | 18(2) |
| F(7Y) | 9226(6)  | 3384(8)  | 8845(4) | 41(3) |
| F(8Y) | 9571(8)  | 3256(10) | 8231(6) | 59(3) |
| F(9Y) | 8525(8)  | 2953(11) | 8220(5) | 48(5) |



*Potter, Szymaniak, Edelstein & Morken, Supporting Information*

|       |          |          |         |       |
|-------|----------|----------|---------|-------|
| F(10) | 7616(3)  | 7347(4)  | 5584(1) | 80(2) |
| F(11) | 6650(2)  | 7216(3)  | 5720(1) | 70(1) |
| F(12) | 7034(3)  | 8603(2)  | 5649(1) | 71(2) |
| C(35) | 10029(3) | 11019(3) | 8537(2) | 40(1) |
| C(36) | 10520(4) | 10934(5) | 8942(2) | 54(2) |
| C(37) | 11053(3) | 10399(5) | 8860(3) | 55(2) |
| C(38) | 10899(3) | 10134(4) | 8385(3) | 47(2) |
| C(39) | 10253(3) | 10533(3) | 8186(2) | 36(1) |
| C(40) | 9377(2)  | 8805(3)  | 8863(1) | 16(1) |
| C(41) | 9976(2)  | 8718(3)  | 9230(2) | 22(1) |
| C(42) | 10508(2) | 8311(3)  | 9051(2) | 23(1) |
| C(43) | 10260(2) | 8158(3)  | 8563(2) | 20(1) |
| C(44) | 9565(2)  | 8474(3)  | 8442(2) | 15(1) |
| C(45) | 8448(2)  | 7931(3)  | 9389(2) | 21(1) |
| C(46) | 8729(3)  | 6991(3)  | 9224(2) | 28(1) |
| C(47) | 7688(2)  | 7778(4)  | 9393(2) | 30(1) |
| C(48) | 8840(2)  | 8134(4)  | 9889(2) | 27(1) |
| C(49) | 8459(2)  | 10151(3) | 9220(2) | 21(1) |
| C(50) | 7887(3)  | 10240(4) | 9496(2) | 29(1) |
| C(51) | 9125(2)  | 10451(4) | 9551(2) | 28(1) |
| C(52) | 8317(2)  | 10855(3) | 8809(2) | 25(1) |
| C(53) | 9138(2)  | 8484(3)  | 7953(1) | 15(1) |
| C(54) | 9529(2)  | 8288(3)  | 7571(2) | 21(1) |
| C(55) | 8597(2)  | 6504(3)  | 8062(1) | 16(1) |
| C(56) | 9270(2)  | 6183(3)  | 8149(2) | 25(1) |
| C(57) | 9421(3)  | 5215(3)  | 8240(2) | 32(1) |
| C(58) | 8896(3)  | 4565(3)  | 8240(2) | 28(1) |
| C(59) | 8232(2)  | 4868(3)  | 8158(2) | 24(1) |
| C(60) | 8077(2)  | 5835(3)  | 8071(2) | 20(1) |
| C(61) | 9064(3)  | 3512(4)  | 8309(3) | 45(2) |
| C(62) | 8008(2)  | 7724(3)  | 7297(1) | 16(1) |
| C(63) | 8029(2)  | 6897(3)  | 7030(2) | 19(1) |
| C(64) | 7785(2)  | 6923(3)  | 6550(2) | 23(1) |
| C(65) | 7514(2)  | 7764(3)  | 6338(2) | 21(1) |
| C(66) | 7487(2)  | 8600(3)  | 6598(2) | 21(1) |
| C(67) | 7734(2)  | 8576(3)  | 7070(2) | 21(1) |

*Potter, Szymaniak, Edelstein & Morken, Supporting Information*

|        |         |         |         |       |
|--------|---------|---------|---------|-------|
| C(68)  | 7224(3) | 7757(3) | 5823(2) | 34(1) |
| C(1S)  | 8246(3) | 1520(4) | 7142(2) | 32(1) |
| C(2S)  | 6248(3) | 118(3)  | 7398(2) | 26(1) |
| Cl(5S) | 8105(1) | 1020(1) | 7663(1) | 29(1) |
| Cl(6S) | 8948(1) | 965(1)  | 6979(1) | 60(1) |
| Cl(7S) | 6435(1) | 521(1)  | 6868(1) | 22(1) |
| Cl(8S) | 5499(1) | 665(1)  | 7493(1) | 33(1) |

---

Table 3. Bond lengths [Å] and angles [°] for C<sub>34</sub>H<sub>38</sub>Cl<sub>2</sub>F<sub>6</sub>FeP<sub>2</sub>Pd(CH<sub>2</sub>Cl<sub>2</sub>).

---

|             |            |
|-------------|------------|
| Pd(1)-P(2)  | 2.2597(10) |
| Pd(1)-P(1)  | 2.3344(10) |
| Pd(1)-Cl(2) | 2.3641(10) |
| Pd(1)-Cl(1) | 2.3642(11) |
| Fe(1)-C(8)  | 2.043(4)   |
| Fe(1)-C(7)  | 2.046(4)   |
| Fe(1)-C(9)  | 2.046(4)   |
| Fe(1)-C(10) | 2.050(4)   |
| Fe(1)-C(4)  | 2.052(4)   |
| Fe(1)-C(3)  | 2.054(4)   |
| Fe(1)-C(1)  | 2.067(4)   |
| Fe(1)-C(2)  | 2.068(4)   |
| Fe(1)-C(5)  | 2.072(4)   |
| Fe(1)-C(6)  | 2.093(4)   |
| P(1)-C(6)   | 1.840(4)   |
| P(1)-C(15)  | 1.908(4)   |
| P(1)-C(11)  | 1.911(4)   |
| P(2)-C(28)  | 1.831(4)   |
| P(2)-C(21)  | 1.832(4)   |
| P(2)-C(19)  | 1.849(4)   |
| F(1)-C(27)  | 1.337(9)   |
| F(2)-C(27)  | 1.351(8)   |
| F(3)-C(27)  | 1.399(9)   |
| F(4)-C(34)  | 1.343(5)   |
| F(5)-C(34)  | 1.354(5)   |
| F(6)-C(34)  | 1.351(5)   |
| C(1)-C(5)   | 1.422(7)   |
| C(1)-C(2)   | 1.430(7)   |
| C(1)-H(1)   | 0.9500     |
| C(2)-C(3)   | 1.435(7)   |
| C(2)-H(2)   | 0.9500     |
| C(3)-C(4)   | 1.422(7)   |
| C(3)-H(3)   | 0.9500     |
| C(4)-C(5)   | 1.442(6)   |

|              |          |
|--------------|----------|
| C(4)-H(4)    | 0.9500   |
| C(5)-H(5)    | 0.9500   |
| C(6)-C(7)    | 1.453(5) |
| C(6)-C(10)   | 1.461(5) |
| C(7)-C(8)    | 1.432(6) |
| C(7)-H(7)    | 0.9500   |
| C(8)-C(9)    | 1.434(6) |
| C(8)-H(8)    | 0.9500   |
| C(9)-C(10)   | 1.446(5) |
| C(9)-H(9)    | 0.9500   |
| C(10)-C(19)  | 1.512(5) |
| C(11)-C(13)  | 1.538(5) |
| C(11)-C(12)  | 1.547(5) |
| C(11)-C(14)  | 1.550(5) |
| C(12)-H(12A) | 0.9800   |
| C(12)-H(12B) | 0.9800   |
| C(12)-H(12C) | 0.9800   |
| C(13)-H(13A) | 0.9800   |
| C(13)-H(13B) | 0.9800   |
| C(13)-H(13C) | 0.9800   |
| C(14)-H(14A) | 0.9800   |
| C(14)-H(14B) | 0.9800   |
| C(14)-H(14C) | 0.9800   |
| C(15)-C(16)  | 1.543(6) |
| C(15)-C(18)  | 1.545(5) |
| C(15)-C(17)  | 1.545(6) |
| C(16)-H(16A) | 0.9800   |
| C(16)-H(16B) | 0.9800   |
| C(16)-H(16C) | 0.9800   |
| C(17)-H(17A) | 0.9800   |
| C(17)-H(17B) | 0.9800   |
| C(17)-H(17C) | 0.9800   |
| C(18)-H(18A) | 0.9800   |
| C(18)-H(18B) | 0.9800   |
| C(18)-H(18C) | 0.9800   |
| C(19)-C(20)  | 1.548(5) |

|              |            |
|--------------|------------|
| C(19)-H(19)  | 1.0000     |
| C(20)-H(20A) | 0.9800     |
| C(20)-H(20B) | 0.9800     |
| C(20)-H(20C) | 0.9800     |
| C(21)-C(26)  | 1.395(5)   |
| C(21)-C(22)  | 1.400(5)   |
| C(22)-C(23)  | 1.402(5)   |
| C(22)-H(22)  | 0.9500     |
| C(23)-C(24)  | 1.387(6)   |
| C(23)-H(23)  | 0.9500     |
| C(24)-C(25)  | 1.407(6)   |
| C(24)-C(27)  | 1.508(6)   |
| C(25)-C(26)  | 1.394(5)   |
| C(25)-H(25)  | 0.9500     |
| C(26)-H(26)  | 0.9500     |
| C(28)-C(29)  | 1.395(5)   |
| C(28)-C(33)  | 1.408(5)   |
| C(29)-C(30)  | 1.399(5)   |
| C(29)-H(29)  | 0.9500     |
| C(30)-C(31)  | 1.388(6)   |
| C(30)-H(30)  | 0.9500     |
| C(31)-C(32)  | 1.403(6)   |
| C(31)-C(34)  | 1.501(6)   |
| C(32)-C(33)  | 1.382(6)   |
| C(32)-H(32)  | 0.9500     |
| C(33)-H(33)  | 0.9500     |
| Pd(2)-P(4)   | 2.2609(11) |
| Pd(2)-P(3)   | 2.3383(11) |
| Pd(2)-Cl(4)  | 2.3615(11) |
| Pd(2)-Cl(3)  | 2.3715(11) |
| Fe(2)-C(43)  | 2.041(4)   |
| Fe(2)-C(38)  | 2.046(5)   |
| Fe(2)-C(37)  | 2.047(5)   |
| Fe(2)-C(44)  | 2.049(4)   |
| Fe(2)-C(36)  | 2.059(5)   |
| Fe(2)-C(42)  | 2.063(4)   |

*Potter, Szymaniak, Edelstein & Morken, Supporting Information*

|             |           |
|-------------|-----------|
| Fe(2)-C(41) | 2.066(5)  |
| Fe(2)-C(39) | 2.071(5)  |
| Fe(2)-C(35) | 2.074(5)  |
| Fe(2)-C(40) | 2.101(4)  |
| P(3)-C(40)  | 1.833(4)  |
| P(3)-C(49)  | 1.895(4)  |
| P(3)-C(45)  | 1.916(4)  |
| P(4)-C(55)  | 1.817(4)  |
| P(4)-C(62)  | 1.837(4)  |
| P(4)-C(53)  | 1.861(4)  |
| F(7)-C(61)  | 1.431(10) |
| F(8)-C(61)  | 1.520(11) |
| F(9)-C(61)  | 1.211(10) |
| F(10)-C(68) | 1.304(7)  |
| F(11)-C(68) | 1.363(7)  |
| F(12)-C(68) | 1.308(6)  |
| C(35)-C(36) | 1.388(9)  |
| C(35)-C(39) | 1.395(8)  |
| C(35)-H(35) | 0.9500    |
| C(36)-C(37) | 1.375(10) |
| C(36)-H(36) | 0.9500    |
| C(37)-C(38) | 1.423(10) |
| C(37)-H(37) | 0.9500    |
| C(38)-C(39) | 1.427(9)  |
| C(38)-H(38) | 0.9500    |
| C(39)-H(39) | 0.9500    |
| C(40)-C(41) | 1.449(6)  |
| C(40)-C(44) | 1.456(6)  |
| C(41)-C(42) | 1.420(6)  |
| C(41)-H(41) | 0.9500    |
| C(42)-C(43) | 1.439(7)  |
| C(42)-H(42) | 0.9500    |
| C(43)-C(44) | 1.444(6)  |
| C(43)-H(43) | 0.9500    |
| C(44)-C(53) | 1.516(6)  |
| C(45)-C(48) | 1.546(6)  |

|              |          |
|--------------|----------|
| C(45)-C(46)  | 1.547(7) |
| C(45)-C(47)  | 1.558(6) |
| C(46)-H(46A) | 0.9800   |
| C(46)-H(46B) | 0.9800   |
| C(46)-H(46C) | 0.9800   |
| C(47)-H(47A) | 0.9800   |
| C(47)-H(47B) | 0.9800   |
| C(47)-H(47C) | 0.9800   |
| C(48)-H(48A) | 0.9800   |
| C(48)-H(48B) | 0.9800   |
| C(48)-H(48C) | 0.9800   |
| C(49)-C(52)  | 1.540(6) |
| C(49)-C(51)  | 1.543(6) |
| C(49)-C(50)  | 1.562(6) |
| C(50)-H(50A) | 0.9800   |
| C(50)-H(50B) | 0.9800   |
| C(50)-H(50C) | 0.9800   |
| C(51)-H(51A) | 0.9800   |
| C(51)-H(51B) | 0.9800   |
| C(51)-H(51C) | 0.9800   |
| C(52)-H(52A) | 0.9800   |
| C(52)-H(52B) | 0.9800   |
| C(52)-H(52C) | 0.9800   |
| C(53)-C(54)  | 1.539(6) |
| C(53)-H(53)  | 1.0000   |
| C(54)-H(54A) | 0.9800   |
| C(54)-H(54B) | 0.9800   |
| C(54)-H(54C) | 0.9800   |
| C(55)-C(56)  | 1.405(6) |
| C(55)-C(60)  | 1.410(6) |
| C(56)-C(57)  | 1.395(6) |
| C(56)-H(56)  | 0.9500   |
| C(57)-C(58)  | 1.394(7) |
| C(57)-H(57)  | 0.9500   |
| C(58)-C(59)  | 1.381(7) |
| C(58)-C(61)  | 1.508(7) |

|                   |            |
|-------------------|------------|
| C(59)-C(60)       | 1.393(6)   |
| C(59)-H(59)       | 0.9500     |
| C(60)-H(60)       | 0.9500     |
| C(62)-C(63)       | 1.402(6)   |
| C(62)-C(67)       | 1.417(6)   |
| C(63)-C(64)       | 1.401(6)   |
| C(63)-H(63)       | 0.9500     |
| C(64)-C(65)       | 1.384(6)   |
| C(64)-H(64)       | 0.9500     |
| C(65)-C(66)       | 1.403(6)   |
| C(65)-C(68)       | 1.511(6)   |
| C(66)-C(67)       | 1.377(6)   |
| C(66)-H(66)       | 0.9500     |
| C(67)-H(67)       | 0.9500     |
| C(1S)-Cl(5S)      | 1.772(5)   |
| C(1S)-Cl(6S)      | 1.773(5)   |
| C(1S)-H(1S1)      | 0.9900     |
| C(1S)-H(1S2)      | 0.9900     |
| C(2S)-Cl(8S)      | 1.774(5)   |
| C(2S)-Cl(7S)      | 1.782(5)   |
| C(2S)-H(2S1)      | 0.9900     |
| C(2S)-H(2S2)      | 0.9900     |
|                   |            |
| P(2)-Pd(1)-P(1)   | 95.68(4)   |
| P(2)-Pd(1)-Cl(2)  | 86.63(4)   |
| P(1)-Pd(1)-Cl(2)  | 168.57(4)  |
| P(2)-Pd(1)-Cl(1)  | 168.14(4)  |
| P(1)-Pd(1)-Cl(1)  | 93.96(4)   |
| Cl(2)-Pd(1)-Cl(1) | 85.28(4)   |
| C(8)-Fe(1)-C(7)   | 40.99(16)  |
| C(8)-Fe(1)-C(9)   | 41.06(16)  |
| C(7)-Fe(1)-C(9)   | 69.23(16)  |
| C(8)-Fe(1)-C(10)  | 69.42(15)  |
| C(7)-Fe(1)-C(10)  | 69.48(15)  |
| C(9)-Fe(1)-C(10)  | 41.34(15)  |
| C(8)-Fe(1)-C(4)   | 115.79(17) |



|                  |            |
|------------------|------------|
| C(7)-Fe(1)-C(4)  | 153.87(17) |
| C(9)-Fe(1)-C(4)  | 100.40(17) |
| C(10)-Fe(1)-C(4) | 119.18(17) |
| C(8)-Fe(1)-C(3)  | 100.91(16) |
| C(7)-Fe(1)-C(3)  | 120.60(17) |
| C(9)-Fe(1)-C(3)  | 114.86(17) |
| C(10)-Fe(1)-C(3) | 152.62(17) |
| C(4)-Fe(1)-C(3)  | 40.53(18)  |
| C(8)-Fe(1)-C(1)  | 158.88(18) |
| C(7)-Fe(1)-C(1)  | 128.14(17) |
| C(9)-Fe(1)-C(1)  | 159.64(18) |
| C(10)-Fe(1)-C(1) | 128.44(17) |
| C(4)-Fe(1)-C(1)  | 68.18(17)  |
| C(3)-Fe(1)-C(1)  | 68.05(18)  |
| C(8)-Fe(1)-C(2)  | 119.68(17) |
| C(7)-Fe(1)-C(2)  | 109.37(18) |
| C(9)-Fe(1)-C(2)  | 152.62(18) |
| C(10)-Fe(1)-C(2) | 165.69(17) |
| C(4)-Fe(1)-C(2)  | 68.47(18)  |
| C(3)-Fe(1)-C(2)  | 40.74(18)  |
| C(1)-Fe(1)-C(2)  | 40.45(18)  |
| C(8)-Fe(1)-C(5)  | 154.06(18) |
| C(7)-Fe(1)-C(5)  | 164.49(17) |
| C(9)-Fe(1)-C(5)  | 120.40(18) |
| C(10)-Fe(1)-C(5) | 108.89(16) |
| C(4)-Fe(1)-C(5)  | 40.92(16)  |
| C(3)-Fe(1)-C(5)  | 68.28(17)  |
| C(1)-Fe(1)-C(5)  | 40.19(18)  |
| C(2)-Fe(1)-C(5)  | 68.17(18)  |
| C(8)-Fe(1)-C(6)  | 69.12(15)  |
| C(7)-Fe(1)-C(6)  | 41.09(15)  |
| C(9)-Fe(1)-C(6)  | 69.33(15)  |
| C(10)-Fe(1)-C(6) | 41.28(14)  |
| C(4)-Fe(1)-C(6)  | 158.94(17) |
| C(3)-Fe(1)-C(6)  | 160.37(17) |
| C(1)-Fe(1)-C(6)  | 115.27(16) |

|                  |            |
|------------------|------------|
| C(2)-Fe(1)-C(6)  | 128.65(17) |
| C(5)-Fe(1)-C(6)  | 127.68(16) |
| C(6)-P(1)-C(15)  | 107.02(17) |
| C(6)-P(1)-C(11)  | 103.18(17) |
| C(15)-P(1)-C(11) | 110.39(17) |
| C(6)-P(1)-Pd(1)  | 115.40(12) |
| C(15)-P(1)-Pd(1) | 116.51(13) |
| C(11)-P(1)-Pd(1) | 103.45(12) |
| C(28)-P(2)-C(21) | 105.16(17) |
| C(28)-P(2)-C(19) | 102.39(17) |
| C(21)-P(2)-C(19) | 110.07(18) |
| C(28)-P(2)-Pd(1) | 111.21(13) |
| C(21)-P(2)-Pd(1) | 114.99(13) |
| C(19)-P(2)-Pd(1) | 112.08(13) |
| C(5)-C(1)-C(2)   | 108.9(4)   |
| C(5)-C(1)-Fe(1)  | 70.1(2)    |
| C(2)-C(1)-Fe(1)  | 69.8(2)    |
| C(5)-C(1)-H(1)   | 125.5      |
| C(2)-C(1)-H(1)   | 125.5      |
| Fe(1)-C(1)-H(1)  | 126.1      |
| C(1)-C(2)-C(3)   | 107.2(4)   |
| C(1)-C(2)-Fe(1)  | 69.7(2)    |
| C(3)-C(2)-Fe(1)  | 69.1(2)    |
| C(1)-C(2)-H(2)   | 126.4      |
| C(3)-C(2)-H(2)   | 126.4      |
| Fe(1)-C(2)-H(2)  | 126.3      |
| C(4)-C(3)-C(2)   | 108.5(4)   |
| C(4)-C(3)-Fe(1)  | 69.6(2)    |
| C(2)-C(3)-Fe(1)  | 70.2(2)    |
| C(4)-C(3)-H(3)   | 125.8      |
| C(2)-C(3)-H(3)   | 125.8      |
| Fe(1)-C(3)-H(3)  | 126.0      |
| C(3)-C(4)-C(5)   | 107.9(4)   |
| C(3)-C(4)-Fe(1)  | 69.8(2)    |
| C(5)-C(4)-Fe(1)  | 70.3(2)    |
| C(3)-C(4)-H(4)   | 126.0      |

|                  |          |
|------------------|----------|
| C(5)-C(4)-H(4)   | 126.0    |
| Fe(1)-C(4)-H(4)  | 125.4    |
| C(1)-C(5)-C(4)   | 107.4(4) |
| C(1)-C(5)-Fe(1)  | 69.7(2)  |
| C(4)-C(5)-Fe(1)  | 68.8(2)  |
| C(1)-C(5)-H(5)   | 126.3    |
| C(4)-C(5)-H(5)   | 126.3    |
| Fe(1)-C(5)-H(5)  | 126.8    |
| C(7)-C(6)-C(10)  | 106.4(3) |
| C(7)-C(6)-P(1)   | 124.7(3) |
| C(10)-C(6)-P(1)  | 125.7(3) |
| C(7)-C(6)-Fe(1)  | 67.7(2)  |
| C(10)-C(6)-Fe(1) | 67.8(2)  |
| P(1)-C(6)-Fe(1)  | 144.8(2) |
| C(8)-C(7)-C(6)   | 108.9(3) |
| C(8)-C(7)-Fe(1)  | 69.4(2)  |
| C(6)-C(7)-Fe(1)  | 71.2(2)  |
| C(8)-C(7)-H(7)   | 125.6    |
| C(6)-C(7)-H(7)   | 125.6    |
| Fe(1)-C(7)-H(7)  | 125.4    |
| C(7)-C(8)-C(9)   | 108.4(3) |
| C(7)-C(8)-Fe(1)  | 69.6(2)  |
| C(9)-C(8)-Fe(1)  | 69.6(2)  |
| C(7)-C(8)-H(8)   | 125.8    |
| C(9)-C(8)-H(8)   | 125.8    |
| Fe(1)-C(8)-H(8)  | 126.6    |
| C(8)-C(9)-C(10)  | 108.0(3) |
| C(8)-C(9)-Fe(1)  | 69.4(2)  |
| C(10)-C(9)-Fe(1) | 69.5(2)  |
| C(8)-C(9)-H(9)   | 126.0    |
| C(10)-C(9)-H(9)  | 126.0    |
| Fe(1)-C(9)-H(9)  | 126.7    |
| C(9)-C(10)-C(6)  | 108.2(3) |
| C(9)-C(10)-C(19) | 123.8(3) |
| C(6)-C(10)-C(19) | 128.0(3) |
| C(9)-C(10)-Fe(1) | 69.2(2)  |

|                     |          |
|---------------------|----------|
| C(6)-C(10)-Fe(1)    | 71.0(2)  |
| C(19)-C(10)-Fe(1)   | 123.7(3) |
| C(13)-C(11)-C(12)   | 108.8(3) |
| C(13)-C(11)-C(14)   | 107.9(3) |
| C(12)-C(11)-C(14)   | 108.7(3) |
| C(13)-C(11)-P(1)    | 107.2(3) |
| C(12)-C(11)-P(1)    | 115.1(3) |
| C(14)-C(11)-P(1)    | 108.9(3) |
| C(11)-C(12)-H(12A)  | 109.5    |
| C(11)-C(12)-H(12B)  | 109.5    |
| H(12A)-C(12)-H(12B) | 109.5    |
| C(11)-C(12)-H(12C)  | 109.5    |
| H(12A)-C(12)-H(12C) | 109.5    |
| H(12B)-C(12)-H(12C) | 109.5    |
| C(11)-C(13)-H(13A)  | 109.5    |
| C(11)-C(13)-H(13B)  | 109.5    |
| H(13A)-C(13)-H(13B) | 109.5    |
| C(11)-C(13)-H(13C)  | 109.5    |
| H(13A)-C(13)-H(13C) | 109.5    |
| H(13B)-C(13)-H(13C) | 109.5    |
| C(11)-C(14)-H(14A)  | 109.5    |
| C(11)-C(14)-H(14B)  | 109.5    |
| H(14A)-C(14)-H(14B) | 109.5    |
| C(11)-C(14)-H(14C)  | 109.5    |
| H(14A)-C(14)-H(14C) | 109.5    |
| H(14B)-C(14)-H(14C) | 109.5    |
| C(16)-C(15)-C(18)   | 107.7(3) |
| C(16)-C(15)-C(17)   | 109.2(3) |
| C(18)-C(15)-C(17)   | 109.7(3) |
| C(16)-C(15)-P(1)    | 110.9(3) |
| C(18)-C(15)-P(1)    | 114.2(3) |
| C(17)-C(15)-P(1)    | 105.0(3) |
| C(15)-C(16)-H(16A)  | 109.5    |
| C(15)-C(16)-H(16B)  | 109.5    |
| H(16A)-C(16)-H(16B) | 109.5    |
| C(15)-C(16)-H(16C)  | 109.5    |

*Potter, Szymaniak, Edelstein & Morken, Supporting Information*

|                     |          |
|---------------------|----------|
| H(16A)-C(16)-H(16C) | 109.5    |
| H(16B)-C(16)-H(16C) | 109.5    |
| C(15)-C(17)-H(17A)  | 109.5    |
| C(15)-C(17)-H(17B)  | 109.5    |
| H(17A)-C(17)-H(17B) | 109.5    |
| C(15)-C(17)-H(17C)  | 109.5    |
| H(17A)-C(17)-H(17C) | 109.5    |
| H(17B)-C(17)-H(17C) | 109.5    |
| C(15)-C(18)-H(18A)  | 109.5    |
| C(15)-C(18)-H(18B)  | 109.5    |
| H(18A)-C(18)-H(18B) | 109.5    |
| C(15)-C(18)-H(18C)  | 109.5    |
| H(18A)-C(18)-H(18C) | 109.5    |
| H(18B)-C(18)-H(18C) | 109.5    |
| C(10)-C(19)-C(20)   | 113.4(3) |
| C(10)-C(19)-P(2)    | 111.4(3) |
| C(20)-C(19)-P(2)    | 114.6(3) |
| C(10)-C(19)-H(19)   | 105.5    |
| C(20)-C(19)-H(19)   | 105.5    |
| P(2)-C(19)-H(19)    | 105.5    |
| C(19)-C(20)-H(20A)  | 109.5    |
| C(19)-C(20)-H(20B)  | 109.5    |
| H(20A)-C(20)-H(20B) | 109.5    |
| C(19)-C(20)-H(20C)  | 109.5    |
| H(20A)-C(20)-H(20C) | 109.5    |
| H(20B)-C(20)-H(20C) | 109.5    |
| C(26)-C(21)-C(22)   | 120.6(3) |
| C(26)-C(21)-P(2)    | 116.3(3) |
| C(22)-C(21)-P(2)    | 123.0(3) |
| C(21)-C(22)-C(23)   | 119.5(4) |
| C(21)-C(22)-H(22)   | 120.2    |
| C(23)-C(22)-H(22)   | 120.2    |
| C(24)-C(23)-C(22)   | 119.8(4) |
| C(24)-C(23)-H(23)   | 120.1    |
| C(22)-C(23)-H(23)   | 120.1    |
| C(23)-C(24)-C(25)   | 120.6(4) |

*Potter, Szymaniak, Edelstein & Morken, Supporting Information*

|                   |          |
|-------------------|----------|
| C(23)-C(24)-C(27) | 121.0(4) |
| C(25)-C(24)-C(27) | 118.4(4) |
| C(26)-C(25)-C(24) | 119.4(4) |
| C(26)-C(25)-H(25) | 120.3    |
| C(24)-C(25)-H(25) | 120.3    |
| C(25)-C(26)-C(21) | 119.9(4) |
| C(25)-C(26)-H(26) | 120.0    |
| C(21)-C(26)-H(26) | 120.0    |
| F(1)-C(27)-F(2)   | 108.5(7) |
| F(1)-C(27)-F(3)   | 106.5(7) |
| F(2)-C(27)-F(3)   | 106.7(6) |
| F(1)-C(27)-C(24)  | 113.1(5) |
| F(2)-C(27)-C(24)  | 111.7(5) |
| F(3)-C(27)-C(24)  | 110.0(5) |
| C(29)-C(28)-C(33) | 119.2(3) |
| C(29)-C(28)-P(2)  | 122.4(3) |
| C(33)-C(28)-P(2)  | 118.3(3) |
| C(28)-C(29)-C(30) | 120.2(4) |
| C(28)-C(29)-H(29) | 119.9    |
| C(30)-C(29)-H(29) | 119.9    |
| C(31)-C(30)-C(29) | 120.2(4) |
| C(31)-C(30)-H(30) | 119.9    |
| C(29)-C(30)-H(30) | 119.9    |
| C(30)-C(31)-C(32) | 119.8(4) |
| C(30)-C(31)-C(34) | 120.8(4) |
| C(32)-C(31)-C(34) | 119.3(4) |
| C(33)-C(32)-C(31) | 120.1(4) |
| C(33)-C(32)-H(32) | 120.0    |
| C(31)-C(32)-H(32) | 120.0    |
| C(32)-C(33)-C(28) | 120.5(4) |
| C(32)-C(33)-H(33) | 119.8    |
| C(28)-C(33)-H(33) | 119.8    |
| F(4)-C(34)-F(6)   | 107.1(3) |
| F(4)-C(34)-F(5)   | 106.0(3) |
| F(6)-C(34)-F(5)   | 105.7(3) |
| F(4)-C(34)-C(31)  | 113.2(3) |

|                   |            |
|-------------------|------------|
| F(6)-C(34)-C(31)  | 112.0(4)   |
| F(5)-C(34)-C(31)  | 112.3(4)   |
| P(4)-Pd(2)-P(3)   | 95.76(4)   |
| P(4)-Pd(2)-Cl(4)  | 86.09(4)   |
| P(3)-Pd(2)-Cl(4)  | 163.52(4)  |
| P(4)-Pd(2)-Cl(3)  | 164.23(4)  |
| P(3)-Pd(2)-Cl(3)  | 94.40(4)   |
| Cl(4)-Pd(2)-Cl(3) | 87.58(4)   |
| C(43)-Fe(2)-C(38) | 100.0(2)   |
| C(43)-Fe(2)-C(37) | 119.5(3)   |
| C(38)-Fe(2)-C(37) | 40.7(3)    |
| C(43)-Fe(2)-C(44) | 41.35(16)  |
| C(38)-Fe(2)-C(44) | 122.3(2)   |
| C(37)-Fe(2)-C(44) | 158.3(3)   |
| C(43)-Fe(2)-C(36) | 157.9(3)   |
| C(38)-Fe(2)-C(36) | 66.7(3)    |
| C(37)-Fe(2)-C(36) | 39.1(3)    |
| C(44)-Fe(2)-C(36) | 160.8(3)   |
| C(43)-Fe(2)-C(42) | 41.05(19)  |
| C(38)-Fe(2)-C(42) | 112.2(2)   |
| C(37)-Fe(2)-C(42) | 102.3(2)   |
| C(44)-Fe(2)-C(42) | 69.29(18)  |
| C(36)-Fe(2)-C(42) | 125.5(3)   |
| C(43)-Fe(2)-C(41) | 68.44(18)  |
| C(38)-Fe(2)-C(41) | 148.6(2)   |
| C(37)-Fe(2)-C(41) | 118.3(2)   |
| C(44)-Fe(2)-C(41) | 68.89(17)  |
| C(36)-Fe(2)-C(41) | 113.1(2)   |
| C(42)-Fe(2)-C(41) | 40.21(18)  |
| C(43)-Fe(2)-C(39) | 115.9(2)   |
| C(38)-Fe(2)-C(39) | 40.6(2)    |
| C(37)-Fe(2)-C(39) | 67.6(2)    |
| C(44)-Fe(2)-C(39) | 108.44(19) |
| C(36)-Fe(2)-C(39) | 66.3(2)    |
| C(42)-Fe(2)-C(39) | 148.3(2)   |
| C(41)-Fe(2)-C(39) | 170.6(2)   |

|                   |            |
|-------------------|------------|
| C(43)-Fe(2)-C(35) | 153.4(2)   |
| C(38)-Fe(2)-C(35) | 67.0(2)    |
| C(37)-Fe(2)-C(35) | 66.5(2)    |
| C(44)-Fe(2)-C(35) | 125.0(2)   |
| C(36)-Fe(2)-C(35) | 39.2(3)    |
| C(42)-Fe(2)-C(35) | 164.6(2)   |
| C(41)-Fe(2)-C(35) | 134.3(2)   |
| C(39)-Fe(2)-C(35) | 39.3(2)    |
| C(43)-Fe(2)-C(40) | 68.86(17)  |
| C(38)-Fe(2)-C(40) | 163.0(2)   |
| C(37)-Fe(2)-C(40) | 156.0(3)   |
| C(44)-Fe(2)-C(40) | 41.04(16)  |
| C(36)-Fe(2)-C(40) | 127.8(2)   |
| C(42)-Fe(2)-C(40) | 68.43(17)  |
| C(41)-Fe(2)-C(40) | 40.67(16)  |
| C(39)-Fe(2)-C(40) | 131.6(2)   |
| C(35)-Fe(2)-C(40) | 117.26(18) |
| C(40)-P(3)-C(49)  | 106.4(2)   |
| C(40)-P(3)-C(45)  | 103.80(19) |
| C(49)-P(3)-C(45)  | 110.3(2)   |
| C(40)-P(3)-Pd(2)  | 114.84(14) |
| C(49)-P(3)-Pd(2)  | 118.32(14) |
| C(45)-P(3)-Pd(2)  | 102.12(14) |
| C(55)-P(4)-C(62)  | 103.74(19) |
| C(55)-P(4)-C(53)  | 109.70(19) |
| C(62)-P(4)-C(53)  | 101.66(19) |
| C(55)-P(4)-Pd(2)  | 118.36(14) |
| C(62)-P(4)-Pd(2)  | 112.02(13) |
| C(53)-P(4)-Pd(2)  | 109.95(13) |
| C(36)-C(35)-C(39) | 108.4(5)   |
| C(36)-C(35)-Fe(2) | 69.8(3)    |
| C(39)-C(35)-Fe(2) | 70.2(3)    |
| C(36)-C(35)-H(35) | 125.8      |
| C(39)-C(35)-H(35) | 125.8      |
| Fe(2)-C(35)-H(35) | 125.8      |
| C(37)-C(36)-C(35) | 109.7(6)   |



|                   |          |
|-------------------|----------|
| C(37)-C(36)-Fe(2) | 69.9(4)  |
| C(35)-C(36)-Fe(2) | 71.0(3)  |
| C(37)-C(36)-H(36) | 125.2    |
| C(35)-C(36)-H(36) | 125.2    |
| Fe(2)-C(36)-H(36) | 125.5    |
| C(36)-C(37)-C(38) | 107.6(5) |
| C(36)-C(37)-Fe(2) | 70.9(3)  |
| C(38)-C(37)-Fe(2) | 69.6(3)  |
| C(36)-C(37)-H(37) | 126.2    |
| C(38)-C(37)-H(37) | 126.2    |
| Fe(2)-C(37)-H(37) | 124.8    |
| C(37)-C(38)-C(39) | 107.0(5) |
| C(37)-C(38)-Fe(2) | 69.7(3)  |
| C(39)-C(38)-Fe(2) | 70.7(3)  |
| C(37)-C(38)-H(38) | 126.5    |
| C(39)-C(38)-H(38) | 126.5    |
| Fe(2)-C(38)-H(38) | 124.8    |
| C(35)-C(39)-C(38) | 107.3(5) |
| C(35)-C(39)-Fe(2) | 70.5(3)  |
| C(38)-C(39)-Fe(2) | 68.8(3)  |
| C(35)-C(39)-H(39) | 126.4    |
| C(38)-C(39)-H(39) | 126.4    |
| Fe(2)-C(39)-H(39) | 126.0    |
| C(41)-C(40)-C(44) | 106.6(3) |
| C(41)-C(40)-P(3)  | 124.9(3) |
| C(44)-C(40)-P(3)  | 125.8(3) |
| C(41)-C(40)-Fe(2) | 68.4(2)  |
| C(44)-C(40)-Fe(2) | 67.6(2)  |
| P(3)-C(40)-Fe(2)  | 143.5(2) |
| C(42)-C(41)-C(40) | 109.5(4) |
| C(42)-C(41)-Fe(2) | 69.8(3)  |
| C(40)-C(41)-Fe(2) | 71.0(2)  |
| C(42)-C(41)-H(41) | 125.3    |
| C(40)-C(41)-H(41) | 125.3    |
| Fe(2)-C(41)-H(41) | 125.6    |
| C(41)-C(42)-C(43) | 107.8(4) |

*Potter, Szymaniak, Edelstein & Morken, Supporting Information*

|                     |          |
|---------------------|----------|
| C(41)-C(42)-Fe(2)   | 70.0(3)  |
| C(43)-C(42)-Fe(2)   | 68.7(2)  |
| C(41)-C(42)-H(42)   | 126.1    |
| C(43)-C(42)-H(42)   | 126.1    |
| Fe(2)-C(42)-H(42)   | 126.8    |
| C(42)-C(43)-C(44)   | 108.3(4) |
| C(42)-C(43)-Fe(2)   | 70.3(3)  |
| C(44)-C(43)-Fe(2)   | 69.6(2)  |
| C(42)-C(43)-H(43)   | 125.8    |
| C(44)-C(43)-H(43)   | 125.8    |
| Fe(2)-C(43)-H(43)   | 125.8    |
| C(43)-C(44)-C(40)   | 107.8(4) |
| C(43)-C(44)-C(53)   | 124.3(4) |
| C(40)-C(44)-C(53)   | 127.9(4) |
| C(43)-C(44)-Fe(2)   | 69.0(2)  |
| C(40)-C(44)-Fe(2)   | 71.4(2)  |
| C(53)-C(44)-Fe(2)   | 123.1(3) |
| C(48)-C(45)-C(46)   | 108.0(4) |
| C(48)-C(45)-C(47)   | 108.8(4) |
| C(46)-C(45)-C(47)   | 108.6(4) |
| C(48)-C(45)-P(3)    | 114.8(3) |
| C(46)-C(45)-P(3)    | 108.2(3) |
| C(47)-C(45)-P(3)    | 108.4(3) |
| C(45)-C(46)-H(46A)  | 109.5    |
| C(45)-C(46)-H(46B)  | 109.5    |
| H(46A)-C(46)-H(46B) | 109.5    |
| C(45)-C(46)-H(46C)  | 109.5    |
| H(46A)-C(46)-H(46C) | 109.5    |
| H(46B)-C(46)-H(46C) | 109.5    |
| C(45)-C(47)-H(47A)  | 109.5    |
| C(45)-C(47)-H(47B)  | 109.5    |
| H(47A)-C(47)-H(47B) | 109.5    |
| C(45)-C(47)-H(47C)  | 109.5    |
| H(47A)-C(47)-H(47C) | 109.5    |
| H(47B)-C(47)-H(47C) | 109.5    |
| C(45)-C(48)-H(48A)  | 109.5    |

*Potter, Szymaniak, Edelstein & Morken, Supporting Information*

|                     |          |
|---------------------|----------|
| C(45)-C(48)-H(48B)  | 109.5    |
| H(48A)-C(48)-H(48B) | 109.5    |
| C(45)-C(48)-H(48C)  | 109.5    |
| H(48A)-C(48)-H(48C) | 109.5    |
| H(48B)-C(48)-H(48C) | 109.5    |
| C(52)-C(49)-C(51)   | 108.5(4) |
| C(52)-C(49)-C(50)   | 109.2(4) |
| C(51)-C(49)-C(50)   | 107.0(4) |
| C(52)-C(49)-P(3)    | 105.1(3) |
| C(51)-C(49)-P(3)    | 112.9(3) |
| C(50)-C(49)-P(3)    | 114.0(3) |
| C(49)-C(50)-H(50A)  | 109.5    |
| C(49)-C(50)-H(50B)  | 109.5    |
| H(50A)-C(50)-H(50B) | 109.5    |
| C(49)-C(50)-H(50C)  | 109.5    |
| H(50A)-C(50)-H(50C) | 109.5    |
| H(50B)-C(50)-H(50C) | 109.5    |
| C(49)-C(51)-H(51A)  | 109.5    |
| C(49)-C(51)-H(51B)  | 109.5    |
| H(51A)-C(51)-H(51B) | 109.5    |
| C(49)-C(51)-H(51C)  | 109.5    |
| H(51A)-C(51)-H(51C) | 109.5    |
| H(51B)-C(51)-H(51C) | 109.5    |
| C(49)-C(52)-H(52A)  | 109.5    |
| C(49)-C(52)-H(52B)  | 109.5    |
| H(52A)-C(52)-H(52B) | 109.5    |
| C(49)-C(52)-H(52C)  | 109.5    |
| H(52A)-C(52)-H(52C) | 109.5    |
| H(52B)-C(52)-H(52C) | 109.5    |
| C(44)-C(53)-C(54)   | 114.9(3) |
| C(44)-C(53)-P(4)    | 110.1(3) |
| C(54)-C(53)-P(4)    | 115.4(3) |
| C(44)-C(53)-H(53)   | 105.1    |
| C(54)-C(53)-H(53)   | 105.1    |
| P(4)-C(53)-H(53)    | 105.1    |
| C(53)-C(54)-H(54A)  | 109.5    |

*Potter, Szymaniak, Edelstein & Morken, Supporting Information*

|                     |          |
|---------------------|----------|
| C(53)-C(54)-H(54B)  | 109.5    |
| H(54A)-C(54)-H(54B) | 109.5    |
| C(53)-C(54)-H(54C)  | 109.5    |
| H(54A)-C(54)-H(54C) | 109.5    |
| H(54B)-C(54)-H(54C) | 109.5    |
| C(56)-C(55)-C(60)   | 119.1(4) |
| C(56)-C(55)-P(4)    | 122.6(3) |
| C(60)-C(55)-P(4)    | 118.3(3) |
| C(57)-C(56)-C(55)   | 120.4(4) |
| C(57)-C(56)-H(56)   | 119.8    |
| C(55)-C(56)-H(56)   | 119.8    |
| C(58)-C(57)-C(56)   | 119.4(5) |
| C(58)-C(57)-H(57)   | 120.3    |
| C(56)-C(57)-H(57)   | 120.3    |
| C(59)-C(58)-C(57)   | 121.1(4) |
| C(59)-C(58)-C(61)   | 120.1(4) |
| C(57)-C(58)-C(61)   | 118.7(5) |
| C(58)-C(59)-C(60)   | 119.9(4) |
| C(58)-C(59)-H(59)   | 120.0    |
| C(60)-C(59)-H(59)   | 120.0    |
| C(59)-C(60)-C(55)   | 120.1(4) |
| C(59)-C(60)-H(60)   | 119.9    |
| C(55)-C(60)-H(60)   | 119.9    |
| F(9)-C(61)-F(7)     | 110.8(7) |
| F(9)-C(61)-C(58)    | 120.3(6) |
| F(7)-C(61)-C(58)    | 112.2(5) |
| F(9)-C(61)-F(8)     | 106.6(6) |
| F(7)-C(61)-F(8)     | 96.3(6)  |
| C(58)-C(61)-F(8)    | 107.8(5) |
| C(63)-C(62)-C(67)   | 118.4(4) |
| C(63)-C(62)-P(4)    | 122.0(3) |
| C(67)-C(62)-P(4)    | 119.5(3) |
| C(64)-C(63)-C(62)   | 120.2(4) |
| C(64)-C(63)-H(63)   | 119.9    |
| C(62)-C(63)-H(63)   | 119.9    |
| C(65)-C(64)-C(63)   | 120.1(4) |

|                     |          |
|---------------------|----------|
| C(65)-C(64)-H(64)   | 120.0    |
| C(63)-C(64)-H(64)   | 120.0    |
| C(64)-C(65)-C(66)   | 120.6(4) |
| C(64)-C(65)-C(68)   | 118.8(4) |
| C(66)-C(65)-C(68)   | 120.5(4) |
| C(67)-C(66)-C(65)   | 119.3(4) |
| C(67)-C(66)-H(66)   | 120.4    |
| C(65)-C(66)-H(66)   | 120.4    |
| C(66)-C(67)-C(62)   | 121.4(4) |
| C(66)-C(67)-H(67)   | 119.3    |
| C(62)-C(67)-H(67)   | 119.3    |
| F(10)-C(68)-F(12)   | 110.1(5) |
| F(10)-C(68)-F(11)   | 103.2(5) |
| F(12)-C(68)-F(11)   | 104.2(5) |
| F(10)-C(68)-C(65)   | 113.6(5) |
| F(12)-C(68)-C(65)   | 114.0(4) |
| F(11)-C(68)-C(65)   | 110.8(4) |
| Cl(5S)-C(1S)-Cl(6S) | 110.8(3) |
| Cl(5S)-C(1S)-H(1S1) | 109.5    |
| Cl(6S)-C(1S)-H(1S1) | 109.5    |
| Cl(5S)-C(1S)-H(1S2) | 109.5    |
| Cl(6S)-C(1S)-H(1S2) | 109.5    |
| H(1S1)-C(1S)-H(1S2) | 108.1    |
| Cl(8S)-C(2S)-Cl(7S) | 110.9(3) |
| Cl(8S)-C(2S)-H(2S1) | 109.5    |
| Cl(7S)-C(2S)-H(2S1) | 109.5    |
| Cl(8S)-C(2S)-H(2S2) | 109.5    |
| Cl(7S)-C(2S)-H(2S2) | 109.5    |
| H(2S1)-C(2S)-H(2S2) | 108.0    |

---

Symmetry transformations used to generate equivalent atoms:

Table 4. Anisotropic displacement parameters ( $\text{\AA}^2 \times 10^3$ ) for  $\text{C}_{34}\text{H}_{38}\text{Cl}_2\text{F}_6\text{FeP}_2\text{Pd}(\text{CH}_2\text{Cl}_2)$ . The anisotropic displacement factor exponent takes the form:  $-2p^2[ h^2 a^*2U^{11} + \dots + 2 h k a^* b^* U^{12} ]$

|       | U <sup>11</sup> | U <sup>22</sup> | U <sup>33</sup> | U <sup>23</sup> | U <sup>13</sup> | U <sup>12</sup> |
|-------|-----------------|-----------------|-----------------|-----------------|-----------------|-----------------|
| Pd(1) | 11(1)           | 11(1)           | 8(1)            | 0(1)            | 3(1)            | 0(1)            |
| Fe(1) | 15(1)           | 6(1)            | 13(1)           | 0(1)            | 1(1)            | -2(1)           |
| Cl(1) | 14(1)           | 32(1)           | 18(1)           | -3(1)           | 5(1)            | 4(1)            |
| Cl(2) | 15(1)           | 25(1)           | 15(1)           | -4(1)           | 2(1)            | -4(1)           |
| P(1)  | 14(1)           | 8(1)            | 8(1)            | 1(1)            | 3(1)            | 1(1)            |
| P(2)  | 12(1)           | 7(1)            | 8(1)            | 0(1)            | 3(1)            | 0(1)            |
| F(4)  | 41(2)           | 34(2)           | 11(1)           | -3(1)           | 7(1)            | 12(1)           |
| F(5)  | 23(1)           | 54(2)           | 18(1)           | 1(1)            | -3(1)           | 8(1)            |
| F(6)  | 55(2)           | 24(2)           | 17(1)           | 8(1)            | 7(1)            | -1(1)           |
| C(1)  | 27(2)           | 4(2)            | 36(3)           | 1(2)            | 9(2)            | -3(2)           |
| C(2)  | 35(3)           | 9(2)            | 26(2)           | -7(2)           | 6(2)            | -7(2)           |
| C(3)  | 22(2)           | 13(2)           | 31(2)           | 2(2)            | -1(2)           | -6(2)           |
| C(4)  | 22(2)           | 11(2)           | 28(2)           | 7(2)            | 9(2)            | -4(2)           |
| C(5)  | 24(2)           | 9(2)            | 27(2)           | 7(2)            | 0(2)            | -4(2)           |
| C(6)  | 14(2)           | 7(2)            | 9(2)            | 2(1)            | 1(1)            | 0(1)            |
| C(7)  | 19(2)           | 10(2)           | 11(2)           | 2(1)            | 3(2)            | -1(1)           |
| C(8)  | 15(2)           | 8(2)            | 15(2)           | 2(1)            | -1(2)           | -2(1)           |
| C(9)  | 15(2)           | 9(2)            | 16(2)           | -1(1)           | 4(2)            | 0(1)            |
| C(10) | 12(2)           | 7(2)            | 12(2)           | -2(1)           | 3(1)            | -1(1)           |
| C(11) | 20(2)           | 9(2)            | 11(2)           | 1(1)            | 5(2)            | -2(1)           |
| C(12) | 23(2)           | 14(2)           | 11(2)           | 4(2)            | 4(2)            | 3(2)            |
| C(13) | 22(2)           | 6(2)            | 16(2)           | 3(1)            | 5(2)            | 1(1)            |
| C(14) | 20(2)           | 16(2)           | 20(2)           | 2(2)            | 6(2)            | -6(2)           |
| C(15) | 20(2)           | 13(2)           | 10(2)           | -2(1)           | 10(2)           | 0(2)            |
| C(16) | 26(2)           | 13(2)           | 17(2)           | -6(2)           | 5(2)            | -2(2)           |
| C(17) | 30(2)           | 10(2)           | 21(2)           | 1(2)            | 4(2)            | 5(2)            |
| C(18) | 21(2)           | 17(2)           | 18(2)           | -2(2)           | 10(2)           | 1(2)            |
| C(19) | 15(2)           | 7(2)            | 13(2)           | 1(1)            | 4(2)            | -2(1)           |
| C(20) | 18(2)           | 18(2)           | 13(2)           | 0(2)            | 8(2)            | -2(2)           |
| C(21) | 20(2)           | 7(2)            | 10(2)           | 1(1)            | 4(2)            | 1(1)            |
| C(22) | 16(2)           | 9(2)            | 16(2)           | -2(1)           | 4(2)            | 1(1)            |

*Potter, Szymaniak, Edelstein & Morken, Supporting Information*

|       |        |        |       |        |        |        |
|-------|--------|--------|-------|--------|--------|--------|
| C(23) | 18(2)  | 11(2)  | 17(2) | 0(2)   | 2(2)   | 1(1)   |
| C(24) | 22(2)  | 6(2)   | 20(2) | -1(2)  | 4(2)   | 1(2)   |
| C(25) | 23(2)  | 10(2)  | 19(2) | -3(2)  | 0(2)   | -1(2)  |
| C(26) | 17(2)  | 11(2)  | 18(2) | -1(2)  | -1(2)  | 1(2)   |
| C(27) | 28(2)  | 13(2)  | 31(3) | -1(2)  | 1(2)   | 1(2)   |
| C(28) | 14(2)  | 11(2)  | 8(2)  | -1(1)  | 2(1)   | -2(1)  |
| C(29) | 22(2)  | 15(2)  | 11(2) | 1(2)   | 2(2)   | 10(2)  |
| C(30) | 26(2)  | 14(2)  | 13(2) | -1(2)  | 4(2)   | 6(2)   |
| C(31) | 16(2)  | 19(2)  | 10(2) | -1(2)  | 4(2)   | 2(2)   |
| C(32) | 24(2)  | 12(2)  | 17(2) | 1(2)   | 5(2)   | 4(2)   |
| C(33) | 26(2)  | 10(2)  | 12(2) | -3(1)  | 6(2)   | 4(2)   |
| C(34) | 25(2)  | 21(2)  | 12(2) | 2(2)   | 5(2)   | 5(2)   |
| Pd(2) | 10(1)  | 17(1)  | 11(1) | -1(1)  | 3(1)   | 0(1)   |
| Fe(2) | 14(1)  | 15(1)  | 23(1) | -1(1)  | 2(1)   | -2(1)  |
| Cl(3) | 15(1)  | 29(1)  | 18(1) | 0(1)   | 6(1)   | 4(1)   |
| Cl(4) | 14(1)  | 31(1)  | 23(1) | -7(1)  | 2(1)   | -5(1)  |
| P(3)  | 13(1)  | 19(1)  | 11(1) | 0(1)   | 2(1)   | 0(1)   |
| P(4)  | 14(1)  | 11(1)  | 14(1) | -2(1)  | 3(1)   | -2(1)  |
| F(10) | 105(3) | 119(4) | 17(2) | -7(2)  | 15(2)  | 52(3)  |
| F(11) | 95(3)  | 74(3)  | 30(2) | -4(2)  | -14(2) | -32(2) |
| F(12) | 143(4) | 29(2)  | 24(2) | 2(1)   | -19(2) | 16(2)  |
| C(35) | 30(3)  | 12(2)  | 81(5) | 0(2)   | 20(3)  | -3(2)  |
| C(36) | 82(5)  | 39(3)  | 41(3) | -16(3) | 14(3)  | -44(4) |
| C(37) | 24(3)  | 52(4)  | 79(5) | 34(4)  | -13(3) | -22(3) |
| C(38) | 48(3)  | 16(2)  | 94(5) | 6(3)   | 53(4)  | 0(2)   |
| C(39) | 57(3)  | 22(2)  | 28(3) | 1(2)   | 7(3)   | -18(2) |
| C(40) | 15(2)  | 16(2)  | 16(2) | 0(2)   | 4(2)   | 1(2)   |
| C(41) | 20(2)  | 24(2)  | 21(2) | 1(2)   | 4(2)   | -2(2)  |
| C(42) | 14(2)  | 22(2)  | 32(3) | 6(2)   | 2(2)   | 2(2)   |
| C(43) | 17(2)  | 15(2)  | 30(2) | 0(2)   | 7(2)   | 0(2)   |
| C(44) | 15(2)  | 10(2)  | 20(2) | -2(2)  | 6(2)   | -4(1)  |
| C(45) | 23(2)  | 27(2)  | 14(2) | 3(2)   | 4(2)   | -2(2)  |
| C(46) | 37(3)  | 27(2)  | 21(2) | 8(2)   | 6(2)   | -2(2)  |
| C(47) | 25(2)  | 42(3)  | 24(2) | 11(2)  | 9(2)   | -5(2)  |
| C(48) | 28(2)  | 38(3)  | 14(2) | 5(2)   | 1(2)   | 2(2)   |
| C(49) | 20(2)  | 22(2)  | 19(2) | -7(2)  | 3(2)   | 0(2)   |

*Potter, Szymaniak, Edelstein & Morken, Supporting Information*

|        |       |       |       |        |       |       |
|--------|-------|-------|-------|--------|-------|-------|
| C(50)  | 31(2) | 37(3) | 22(2) | -7(2)  | 9(2)  | 8(2)  |
| C(51)  | 30(2) | 30(3) | 22(2) | -11(2) | 1(2)  | -4(2) |
| C(52)  | 28(2) | 20(2) | 27(2) | 1(2)   | 7(2)  | 6(2)  |
| C(53)  | 17(2) | 11(2) | 17(2) | -2(2)  | 6(2)  | -2(1) |
| C(54)  | 20(2) | 23(2) | 24(2) | -4(2)  | 12(2) | -4(2) |
| C(55)  | 22(2) | 9(2)  | 16(2) | 0(2)   | 3(2)  | -2(2) |
| C(56)  | 22(2) | 12(2) | 41(3) | 3(2)   | 7(2)  | -1(2) |
| C(57)  | 28(2) | 16(2) | 52(3) | 8(2)   | 8(2)  | 2(2)  |
| C(58)  | 35(3) | 15(2) | 34(3) | 3(2)   | 7(2)  | -2(2) |
| C(59)  | 29(2) | 17(2) | 25(2) | 0(2)   | 3(2)  | -9(2) |
| C(60)  | 21(2) | 16(2) | 20(2) | 2(2)   | 2(2)  | -6(2) |
| C(61)  | 41(3) | 17(2) | 76(5) | 10(3)  | 10(3) | -3(2) |
| C(62)  | 16(2) | 11(2) | 20(2) | -2(2)  | 7(2)  | -1(1) |
| C(63)  | 25(2) | 12(2) | 21(2) | -2(2)  | 6(2)  | 1(2)  |
| C(64)  | 34(2) | 15(2) | 20(2) | -7(2)  | 3(2)  | 1(2)  |
| C(65)  | 31(2) | 18(2) | 14(2) | -6(2)  | 4(2)  | 0(2)  |
| C(66)  | 34(2) | 12(2) | 16(2) | -1(2)  | 6(2)  | 6(2)  |
| C(67)  | 30(2) | 14(2) | 20(2) | -1(2)  | 10(2) | -2(2) |
| C(68)  | 60(4) | 19(2) | 19(2) | -1(2)  | 3(2)  | 6(2)  |
| C(1S)  | 34(3) | 31(3) | 32(3) | 9(2)   | 14(2) | 7(2)  |
| C(2S)  | 33(2) | 25(2) | 21(2) | 6(2)   | 7(2)  | -1(2) |
| CI(5S) | 38(1) | 23(1) | 24(1) | -1(1)  | 5(1)  | 3(1)  |
| CI(6S) | 58(1) | 52(1) | 87(1) | 26(1)  | 49(1) | 23(1) |
| CI(7S) | 28(1) | 21(1) | 20(1) | 1(1)   | 8(1)  | 3(1)  |
| CI(8S) | 33(1) | 38(1) | 31(1) | 3(1)   | 16(1) | -2(1) |

---



Table 5. Hydrogen coordinates ( $\times 10^4$ ) and isotropic displacement parameters ( $\text{\AA}^2 \times 10^3$ ) for  $\text{C}_{34}\text{H}_{38}\text{Cl}_2\text{F}_6\text{FeP}_2\text{Pd}(\text{CH}_2\text{Cl}_2)$ .

|        | x    | y    | z    | U(eq) |
|--------|------|------|------|-------|
| H(1)   | 5330 | 282  | 5754 | 27    |
| H(2)   | 4419 | 596  | 5030 | 28    |
| H(3)   | 3374 | 1217 | 5291 | 27    |
| H(4)   | 3644 | 1295 | 6168 | 24    |
| H(5)   | 4857 | 690  | 6457 | 25    |
| H(7)   | 4879 | 2927 | 4997 | 16    |
| H(8)   | 3784 | 3322 | 5243 | 16    |
| H(9)   | 4024 | 3392 | 6124 | 16    |
| H(12A) | 5578 | 3824 | 4772 | 24    |
| H(12B) | 6336 | 3635 | 4716 | 24    |
| H(12C) | 6039 | 4706 | 4679 | 24    |
| H(13A) | 5875 | 5576 | 5365 | 21    |
| H(13B) | 6031 | 5082 | 5866 | 21    |
| H(13C) | 5391 | 4745 | 5481 | 21    |
| H(14A) | 7332 | 4096 | 5377 | 28    |
| H(14B) | 7179 | 4774 | 5779 | 28    |
| H(14C) | 7052 | 5163 | 5259 | 28    |
| H(16A) | 6112 | 1099 | 4861 | 28    |
| H(16B) | 5821 | 2172 | 4802 | 28    |
| H(16C) | 5574 | 1447 | 5151 | 28    |
| H(17A) | 6762 | 581  | 5647 | 30    |
| H(17B) | 6317 | 1143 | 5947 | 30    |
| H(17C) | 7108 | 1367 | 6018 | 30    |
| H(18A) | 7536 | 2418 | 5445 | 26    |
| H(18B) | 7054 | 2607 | 4948 | 26    |
| H(18C) | 7312 | 1541 | 5095 | 26    |
| H(19)  | 5592 | 2334 | 6661 | 14    |
| H(20A) | 4677 | 3659 | 6936 | 23    |
| H(20B) | 5107 | 2856 | 7259 | 23    |
| H(20C) | 4515 | 2544 | 6833 | 23    |

*Potter, Szymaniak, Edelstein & Morken, Supporting Information*

|        |       |       |       |    |
|--------|-------|-------|-------|----|
| H(22)  | 4792  | 4820  | 6429  | 17 |
| H(23)  | 4487  | 6442  | 6280  | 19 |
| H(25)  | 6425  | 7254  | 6825  | 22 |
| H(26)  | 6735  | 5634  | 6957  | 19 |
| H(29)  | 5994  | 4945  | 7612  | 20 |
| H(30)  | 6328  | 4677  | 8411  | 21 |
| H(32)  | 7062  | 2057  | 8167  | 21 |
| H(33)  | 6752  | 2332  | 7373  | 19 |
| H(35)  | 9612  | 11351 | 8505  | 48 |
| H(36)  | 10492 | 11205 | 9232  | 64 |
| H(37)  | 11452 | 10236 | 9081  | 66 |
| H(38)  | 11175 | 9762  | 8229  | 56 |
| H(39)  | 10018 | 10478 | 7872  | 43 |
| H(41)  | 10007 | 8905  | 9543  | 26 |
| H(42)  | 10949 | 8164  | 9222  | 28 |
| H(43)  | 10510 | 7895  | 8356  | 24 |
| H(46A) | 8704  | 6474  | 9445  | 43 |
| H(46B) | 9201  | 7088  | 9204  | 43 |
| H(46C) | 8460  | 6815  | 8919  | 43 |
| H(47A) | 7437  | 7629  | 9080  | 45 |
| H(47B) | 7505  | 8365  | 9502  | 45 |
| H(47C) | 7643  | 7244  | 9601  | 45 |
| H(48A) | 8756  | 7614  | 10093 | 41 |
| H(48B) | 8686  | 8745  | 9995  | 41 |
| H(48C) | 9324  | 8172  | 9895  | 41 |
| H(50A) | 7855  | 10909 | 9594  | 44 |
| H(50B) | 7990  | 9824  | 9769  | 44 |
| H(50C) | 7455  | 10045 | 9299  | 44 |
| H(51A) | 9495  | 10431 | 9385  | 42 |
| H(51B) | 9223  | 10007 | 9814  | 42 |
| H(51C) | 9079  | 11105 | 9663  | 42 |
| H(52A) | 8339  | 11516 | 8925  | 37 |
| H(52B) | 7866  | 10730 | 8619  | 37 |
| H(52C) | 8656  | 10766 | 8621  | 37 |
| H(53)  | 8973  | 9161  | 7901  | 18 |
| H(54A) | 9923  | 8715  | 7613  | 32 |

*Potter, Szymaniak, Edelstein & Morken, Supporting Information*

|        |      |      |      |    |
|--------|------|------|------|----|
| H(54B) | 9234 | 8408 | 7268 | 32 |
| H(54C) | 9681 | 7617 | 7589 | 32 |
| H(56)  | 9624 | 6628 | 8145 | 30 |
| H(57)  | 9876 | 4999 | 8301 | 38 |
| H(59)  | 7881 | 4416 | 8161 | 29 |
| H(60)  | 7620 | 6044 | 8018 | 23 |
| H(63)  | 8211 | 6316 | 7175 | 23 |
| H(64)  | 7804 | 6363 | 6370 | 28 |
| H(66)  | 7300 | 9176 | 6451 | 25 |
| H(67)  | 7720 | 9144 | 7246 | 25 |
| H(1S1) | 8332 | 2219 | 7184 | 38 |
| H(1S2) | 7838 | 1432 | 6893 | 38 |
| H(2S1) | 6192 | -589 | 7389 | 31 |
| H(2S2) | 6630 | 278  | 7657 | 31 |

---

Table 6. Torsion angles [°] for C<sub>34</sub>H<sub>38</sub>Cl<sub>2</sub>F<sub>6</sub>FeP<sub>2</sub>Pd(CH<sub>2</sub>Cl<sub>2</sub>).

---

|                       |           |
|-----------------------|-----------|
| C(5)-C(1)-C(2)-C(3)   | 0.2(4)    |
| Fe(1)-C(1)-C(2)-C(3)  | -59.2(3)  |
| C(5)-C(1)-C(2)-Fe(1)  | 59.4(3)   |
| C(1)-C(2)-C(3)-C(4)   | 0.2(5)    |
| Fe(1)-C(2)-C(3)-C(4)  | -59.3(3)  |
| C(1)-C(2)-C(3)-Fe(1)  | 59.6(3)   |
| C(2)-C(3)-C(4)-C(5)   | -0.6(5)   |
| Fe(1)-C(3)-C(4)-C(5)  | -60.2(3)  |
| C(2)-C(3)-C(4)-Fe(1)  | 59.6(3)   |
| C(2)-C(1)-C(5)-C(4)   | -0.6(4)   |
| Fe(1)-C(1)-C(5)-C(4)  | 58.6(3)   |
| C(2)-C(1)-C(5)-Fe(1)  | -59.2(3)  |
| C(3)-C(4)-C(5)-C(1)   | 0.7(4)    |
| Fe(1)-C(4)-C(5)-C(1)  | -59.2(3)  |
| C(3)-C(4)-C(5)-Fe(1)  | 59.9(3)   |
| C(15)-P(1)-C(6)-C(7)  | -69.8(3)  |
| C(11)-P(1)-C(6)-C(7)  | 46.6(3)   |
| Pd(1)-P(1)-C(6)-C(7)  | 158.7(3)  |
| C(15)-P(1)-C(6)-C(10) | 132.9(3)  |
| C(11)-P(1)-C(6)-C(10) | -110.7(3) |
| Pd(1)-P(1)-C(6)-C(10) | 1.4(4)    |
| C(15)-P(1)-C(6)-Fe(1) | 30.6(4)   |
| C(11)-P(1)-C(6)-Fe(1) | 147.1(3)  |
| Pd(1)-P(1)-C(6)-Fe(1) | -100.8(3) |
| C(10)-C(6)-C(7)-C(8)  | 2.6(4)    |
| P(1)-C(6)-C(7)-C(8)   | -158.4(3) |
| Fe(1)-C(6)-C(7)-C(8)  | 59.4(3)   |
| C(10)-C(6)-C(7)-Fe(1) | -56.8(2)  |
| P(1)-C(6)-C(7)-Fe(1)  | 142.2(3)  |
| C(6)-C(7)-C(8)-C(9)   | -1.6(4)   |
| Fe(1)-C(7)-C(8)-C(9)  | 58.9(3)   |
| C(6)-C(7)-C(8)-Fe(1)  | -60.5(3)  |
| C(7)-C(8)-C(9)-C(10)  | 0.0(4)    |
| Fe(1)-C(8)-C(9)-C(10) | 58.9(3)   |

|                         |           |
|-------------------------|-----------|
| C(7)-C(8)-C(9)-Fe(1)    | -58.9(3)  |
| C(8)-C(9)-C(10)-C(6)    | 1.7(4)    |
| Fe(1)-C(9)-C(10)-C(6)   | 60.5(2)   |
| C(8)-C(9)-C(10)-C(19)   | -176.2(3) |
| Fe(1)-C(9)-C(10)-C(19)  | -117.4(3) |
| C(8)-C(9)-C(10)-Fe(1)   | -58.8(3)  |
| C(7)-C(6)-C(10)-C(9)    | -2.6(4)   |
| P(1)-C(6)-C(10)-C(9)    | 158.1(3)  |
| Fe(1)-C(6)-C(10)-C(9)   | -59.4(2)  |
| C(7)-C(6)-C(10)-C(19)   | 175.2(3)  |
| P(1)-C(6)-C(10)-C(19)   | -24.1(5)  |
| Fe(1)-C(6)-C(10)-C(19)  | 118.4(4)  |
| C(7)-C(6)-C(10)-Fe(1)   | 56.8(2)   |
| P(1)-C(6)-C(10)-Fe(1)   | -142.5(3) |
| C(9)-C(10)-C(19)-C(20)  | 6.8(5)    |
| C(6)-C(10)-C(19)-C(20)  | -170.6(4) |
| Fe(1)-C(10)-C(19)-C(20) | -79.3(4)  |
| C(9)-C(10)-C(19)-P(2)   | -124.3(3) |
| C(6)-C(10)-C(19)-P(2)   | 58.3(4)   |
| Fe(1)-C(10)-C(19)-P(2)  | 149.6(2)  |
| C(28)-P(2)-C(19)-C(10)  | 175.0(3)  |
| C(21)-P(2)-C(19)-C(10)  | 63.6(3)   |
| Pd(1)-P(2)-C(19)-C(10)  | -65.7(3)  |
| C(28)-P(2)-C(19)-C(20)  | 44.5(3)   |
| C(21)-P(2)-C(19)-C(20)  | -66.9(3)  |
| Pd(1)-P(2)-C(19)-C(20)  | 163.8(2)  |
| C(28)-P(2)-C(21)-C(26)  | 69.2(3)   |
| C(19)-P(2)-C(21)-C(26)  | 178.8(3)  |
| Pd(1)-P(2)-C(21)-C(26)  | -53.4(3)  |
| C(28)-P(2)-C(21)-C(22)  | -115.1(3) |
| C(19)-P(2)-C(21)-C(22)  | -5.5(4)   |
| Pd(1)-P(2)-C(21)-C(22)  | 122.3(3)  |
| C(26)-C(21)-C(22)-C(23) | 1.2(6)    |
| P(2)-C(21)-C(22)-C(23)  | -174.4(3) |
| C(21)-C(22)-C(23)-C(24) | 0.0(6)    |
| C(22)-C(23)-C(24)-C(25) | -1.9(6)   |

*Potter, Szymaniak, Edelstein & Morken, Supporting Information*

|                         |           |
|-------------------------|-----------|
| C(22)-C(23)-C(24)-C(27) | 179.9(4)  |
| C(23)-C(24)-C(25)-C(26) | 2.7(6)    |
| C(27)-C(24)-C(25)-C(26) | -179.1(4) |
| C(24)-C(25)-C(26)-C(21) | -1.6(6)   |
| C(22)-C(21)-C(26)-C(25) | -0.4(6)   |
| P(2)-C(21)-C(26)-C(25)  | 175.4(3)  |
| C(23)-C(24)-C(27)-F(1)  | -16.7(8)  |
| C(25)-C(24)-C(27)-F(1)  | 165.1(7)  |
| C(23)-C(24)-C(27)-F(2)  | -139.5(6) |
| C(25)-C(24)-C(27)-F(2)  | 42.3(7)   |
| C(23)-C(24)-C(27)-F(3)  | 102.2(6)  |
| C(25)-C(24)-C(27)-F(3)  | -76.0(7)  |
| C(21)-P(2)-C(28)-C(29)  | 7.9(4)    |
| C(19)-P(2)-C(28)-C(29)  | -107.2(4) |
| Pd(1)-P(2)-C(28)-C(29)  | 132.9(3)  |
| C(21)-P(2)-C(28)-C(33)  | -174.3(3) |
| C(19)-P(2)-C(28)-C(33)  | 70.6(3)   |
| Pd(1)-P(2)-C(28)-C(33)  | -49.2(3)  |
| C(33)-C(28)-C(29)-C(30) | 1.5(6)    |
| P(2)-C(28)-C(29)-C(30)  | 179.3(3)  |
| C(28)-C(29)-C(30)-C(31) | -1.2(7)   |
| C(29)-C(30)-C(31)-C(32) | 0.2(7)    |
| C(29)-C(30)-C(31)-C(34) | 177.7(4)  |
| C(30)-C(31)-C(32)-C(33) | 0.5(6)    |
| C(34)-C(31)-C(32)-C(33) | -177.1(4) |
| C(31)-C(32)-C(33)-C(28) | -0.2(6)   |
| C(29)-C(28)-C(33)-C(32) | -0.8(6)   |
| P(2)-C(28)-C(33)-C(32)  | -178.7(3) |
| C(30)-C(31)-C(34)-F(4)  | 10.4(6)   |
| C(32)-C(31)-C(34)-F(4)  | -172.1(4) |
| C(30)-C(31)-C(34)-F(6)  | 131.7(4)  |
| C(32)-C(31)-C(34)-F(6)  | -50.8(5)  |
| C(30)-C(31)-C(34)-F(5)  | -109.6(5) |
| C(32)-C(31)-C(34)-F(5)  | 67.9(5)   |
| C(39)-C(35)-C(36)-C(37) | -0.4(6)   |
| Fe(2)-C(35)-C(36)-C(37) | 59.4(4)   |

|                         |           |
|-------------------------|-----------|
| C(39)-C(35)-C(36)-Fe(2) | -59.8(4)  |
| C(35)-C(36)-C(37)-C(38) | 0.2(6)    |
| Fe(2)-C(36)-C(37)-C(38) | 60.3(4)   |
| C(35)-C(36)-C(37)-Fe(2) | -60.0(4)  |
| C(36)-C(37)-C(38)-C(39) | 0.0(6)    |
| Fe(2)-C(37)-C(38)-C(39) | 61.1(3)   |
| C(36)-C(37)-C(38)-Fe(2) | -61.1(4)  |
| C(36)-C(35)-C(39)-C(38) | 0.4(6)    |
| Fe(2)-C(35)-C(39)-C(38) | -59.1(3)  |
| C(36)-C(35)-C(39)-Fe(2) | 59.6(4)   |
| C(37)-C(38)-C(39)-C(35) | -0.3(6)   |
| Fe(2)-C(38)-C(39)-C(35) | 60.2(3)   |
| C(37)-C(38)-C(39)-Fe(2) | -60.5(4)  |
| C(49)-P(3)-C(40)-C(41)  | 68.7(4)   |
| C(45)-P(3)-C(40)-C(41)  | -47.8(4)  |
| Pd(2)-P(3)-C(40)-C(41)  | -158.4(3) |
| C(49)-P(3)-C(40)-C(44)  | -132.7(4) |
| C(45)-P(3)-C(40)-C(44)  | 110.9(4)  |
| Pd(2)-P(3)-C(40)-C(44)  | 0.3(4)    |
| C(49)-P(3)-C(40)-Fe(2)  | -32.0(4)  |
| C(45)-P(3)-C(40)-Fe(2)  | -148.5(4) |
| Pd(2)-P(3)-C(40)-Fe(2)  | 100.9(4)  |
| C(44)-C(40)-C(41)-C(42) | -2.4(5)   |
| P(3)-C(40)-C(41)-C(42)  | 159.6(3)  |
| Fe(2)-C(40)-C(41)-C(42) | -59.3(3)  |
| C(44)-C(40)-C(41)-Fe(2) | 56.9(3)   |
| P(3)-C(40)-C(41)-Fe(2)  | -141.0(3) |
| C(40)-C(41)-C(42)-C(43) | 1.6(5)    |
| Fe(2)-C(41)-C(42)-C(43) | -58.4(3)  |
| C(40)-C(41)-C(42)-Fe(2) | 60.1(3)   |
| C(41)-C(42)-C(43)-C(44) | -0.2(5)   |
| Fe(2)-C(42)-C(43)-C(44) | -59.4(3)  |
| C(41)-C(42)-C(43)-Fe(2) | 59.3(3)   |
| C(42)-C(43)-C(44)-C(40) | -1.4(5)   |
| Fe(2)-C(43)-C(44)-C(40) | -61.2(3)  |
| C(42)-C(43)-C(44)-C(53) | 176.3(4)  |

|                         |           |
|-------------------------|-----------|
| Fe(2)-C(43)-C(44)-C(53) | 116.5(4)  |
| C(42)-C(43)-C(44)-Fe(2) | 59.9(3)   |
| C(41)-C(40)-C(44)-C(43) | 2.3(5)    |
| P(3)-C(40)-C(44)-C(43)  | -159.5(3) |
| Fe(2)-C(40)-C(44)-C(43) | 59.7(3)   |
| C(41)-C(40)-C(44)-C(53) | -175.3(4) |
| P(3)-C(40)-C(44)-C(53)  | 22.9(6)   |
| Fe(2)-C(40)-C(44)-C(53) | -117.9(4) |
| C(41)-C(40)-C(44)-Fe(2) | -57.4(3)  |
| P(3)-C(40)-C(44)-Fe(2)  | 140.8(3)  |
| C(40)-P(3)-C(49)-C(52)  | 83.3(3)   |
| C(45)-P(3)-C(49)-C(52)  | -164.7(3) |
| Pd(2)-P(3)-C(49)-C(52)  | -47.7(3)  |
| C(40)-P(3)-C(49)-C(51)  | -34.8(4)  |
| C(45)-P(3)-C(49)-C(51)  | 77.2(4)   |
| Pd(2)-P(3)-C(49)-C(51)  | -165.8(3) |
| C(40)-P(3)-C(49)-C(50)  | -157.1(3) |
| C(45)-P(3)-C(49)-C(50)  | -45.1(4)  |
| Pd(2)-P(3)-C(49)-C(50)  | 71.9(3)   |
| C(43)-C(44)-C(53)-C(54) | -9.7(5)   |
| C(40)-C(44)-C(53)-C(54) | 167.5(4)  |
| Fe(2)-C(44)-C(53)-C(54) | 76.1(4)   |
| C(43)-C(44)-C(53)-P(4)  | 122.6(4)  |
| C(40)-C(44)-C(53)-P(4)  | -60.2(5)  |
| Fe(2)-C(44)-C(53)-P(4)  | -151.5(2) |
| C(55)-P(4)-C(53)-C(44)  | -62.5(3)  |
| C(62)-P(4)-C(53)-C(44)  | -171.9(3) |
| Pd(2)-P(4)-C(53)-C(44)  | 69.3(3)   |
| C(55)-P(4)-C(53)-C(54)  | 69.6(3)   |
| C(62)-P(4)-C(53)-C(54)  | -39.8(3)  |
| Pd(2)-P(4)-C(53)-C(54)  | -158.6(3) |
| C(62)-P(4)-C(55)-C(56)  | 104.4(4)  |
| C(53)-P(4)-C(55)-C(56)  | -3.6(4)   |
| Pd(2)-P(4)-C(55)-C(56)  | -130.8(4) |
| C(62)-P(4)-C(55)-C(60)  | -73.9(4)  |
| C(53)-P(4)-C(55)-C(60)  | 178.1(3)  |



*Potter, Szymaniak, Edelstein & Morken, Supporting Information*

|                         |           |
|-------------------------|-----------|
| Pd(2)-P(4)-C(55)-C(60)  | 50.9(4)   |
| C(60)-C(55)-C(56)-C(57) | 0.3(7)    |
| P(4)-C(55)-C(56)-C(57)  | -178.0(4) |
| C(55)-C(56)-C(57)-C(58) | 0.6(8)    |
| C(56)-C(57)-C(58)-C(59) | -1.0(8)   |
| C(56)-C(57)-C(58)-C(61) | 176.1(5)  |
| C(57)-C(58)-C(59)-C(60) | 0.3(8)    |
| C(61)-C(58)-C(59)-C(60) | -176.7(5) |
| C(58)-C(59)-C(60)-C(55) | 0.6(7)    |
| C(56)-C(55)-C(60)-C(59) | -0.9(7)   |
| P(4)-C(55)-C(60)-C(59)  | 177.4(3)  |
| C(59)-C(58)-C(61)-F(9)  | -29.6(10) |
| C(57)-C(58)-C(61)-F(9)  | 153.3(7)  |
| C(59)-C(58)-C(61)-F(7)  | -162.5(6) |
| C(57)-C(58)-C(61)-F(7)  | 20.3(9)   |
| C(59)-C(58)-C(61)-F(8)  | 92.7(6)   |
| C(57)-C(58)-C(61)-F(8)  | -84.5(7)  |
| C(55)-P(4)-C(62)-C(63)  | -6.9(4)   |
| C(53)-P(4)-C(62)-C(63)  | 107.0(4)  |
| Pd(2)-P(4)-C(62)-C(63)  | -135.6(3) |
| C(55)-P(4)-C(62)-C(67)  | 176.5(3)  |
| C(53)-P(4)-C(62)-C(67)  | -69.6(4)  |
| Pd(2)-P(4)-C(62)-C(67)  | 47.7(4)   |
| C(67)-C(62)-C(63)-C(64) | 0.0(6)    |
| P(4)-C(62)-C(63)-C(64)  | -176.6(3) |
| C(62)-C(63)-C(64)-C(65) | -0.6(7)   |
| C(63)-C(64)-C(65)-C(66) | 0.6(7)    |
| C(63)-C(64)-C(65)-C(68) | -177.1(5) |
| C(64)-C(65)-C(66)-C(67) | 0.1(7)    |
| C(68)-C(65)-C(66)-C(67) | 177.7(5)  |
| C(65)-C(66)-C(67)-C(62) | -0.7(7)   |
| C(63)-C(62)-C(67)-C(66) | 0.6(6)    |
| P(4)-C(62)-C(67)-C(66)  | 177.4(4)  |
| C(64)-C(65)-C(68)-F(10) | -47.2(7)  |
| C(66)-C(65)-C(68)-F(10) | 135.0(5)  |
| C(64)-C(65)-C(68)-F(12) | -174.4(5) |

*Potter, Szymaniak, Edelstein & Morken, Supporting Information*

|                         |           |
|-------------------------|-----------|
| C(66)-C(65)-C(68)-F(12) | 7.8(8)    |
| C(64)-C(65)-C(68)-F(11) | 68.3(6)   |
| C(66)-C(65)-C(68)-F(11) | -109.4(5) |

---

Symmetry transformations used to generate equivalent atoms:

$^1\text{H}$  and  
 $^{13}\text{C}$  NMR  
Spectral Data

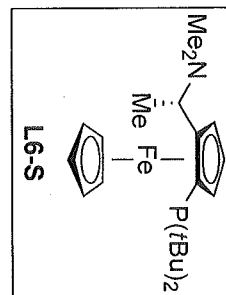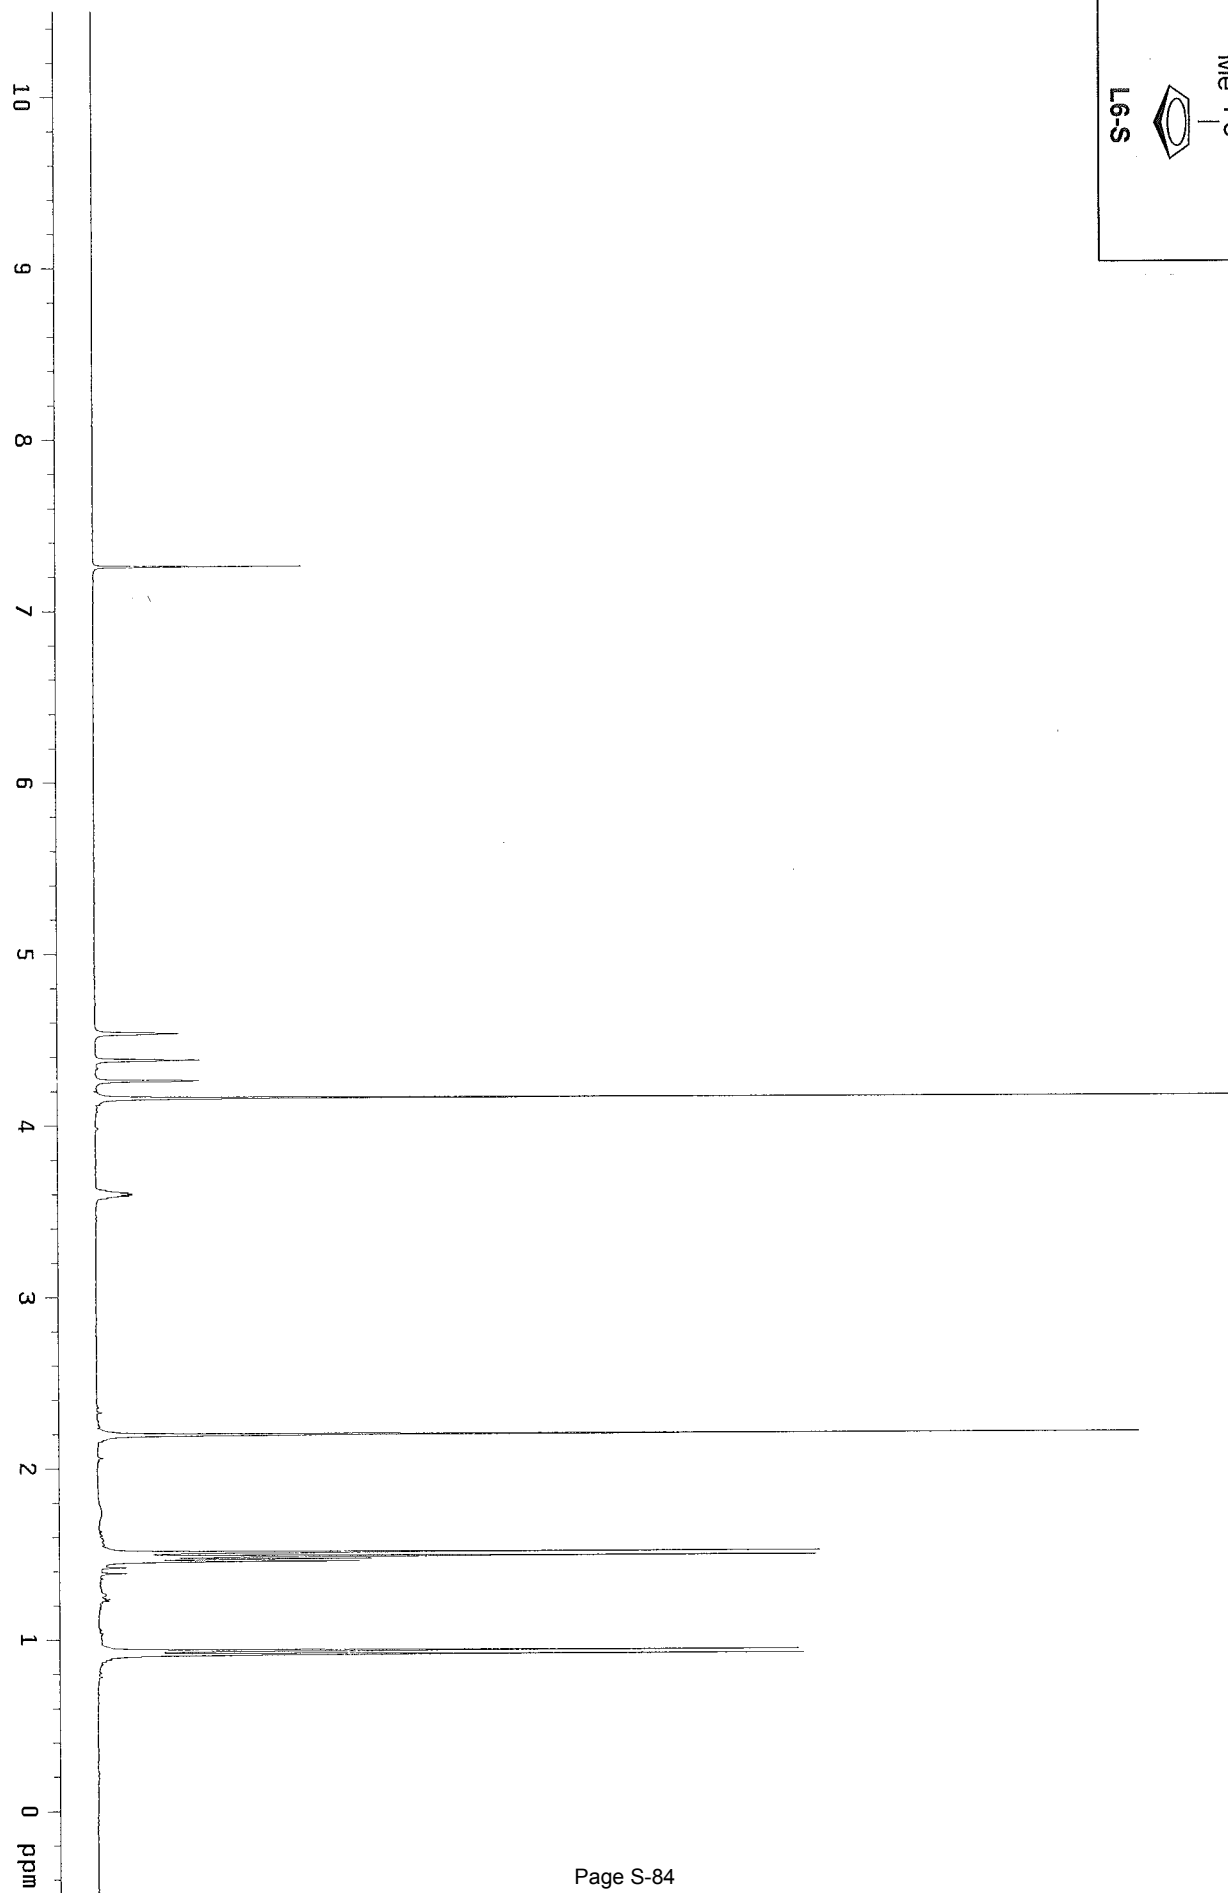

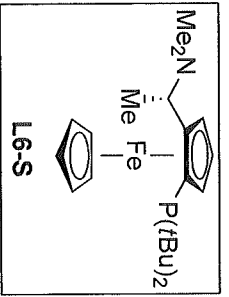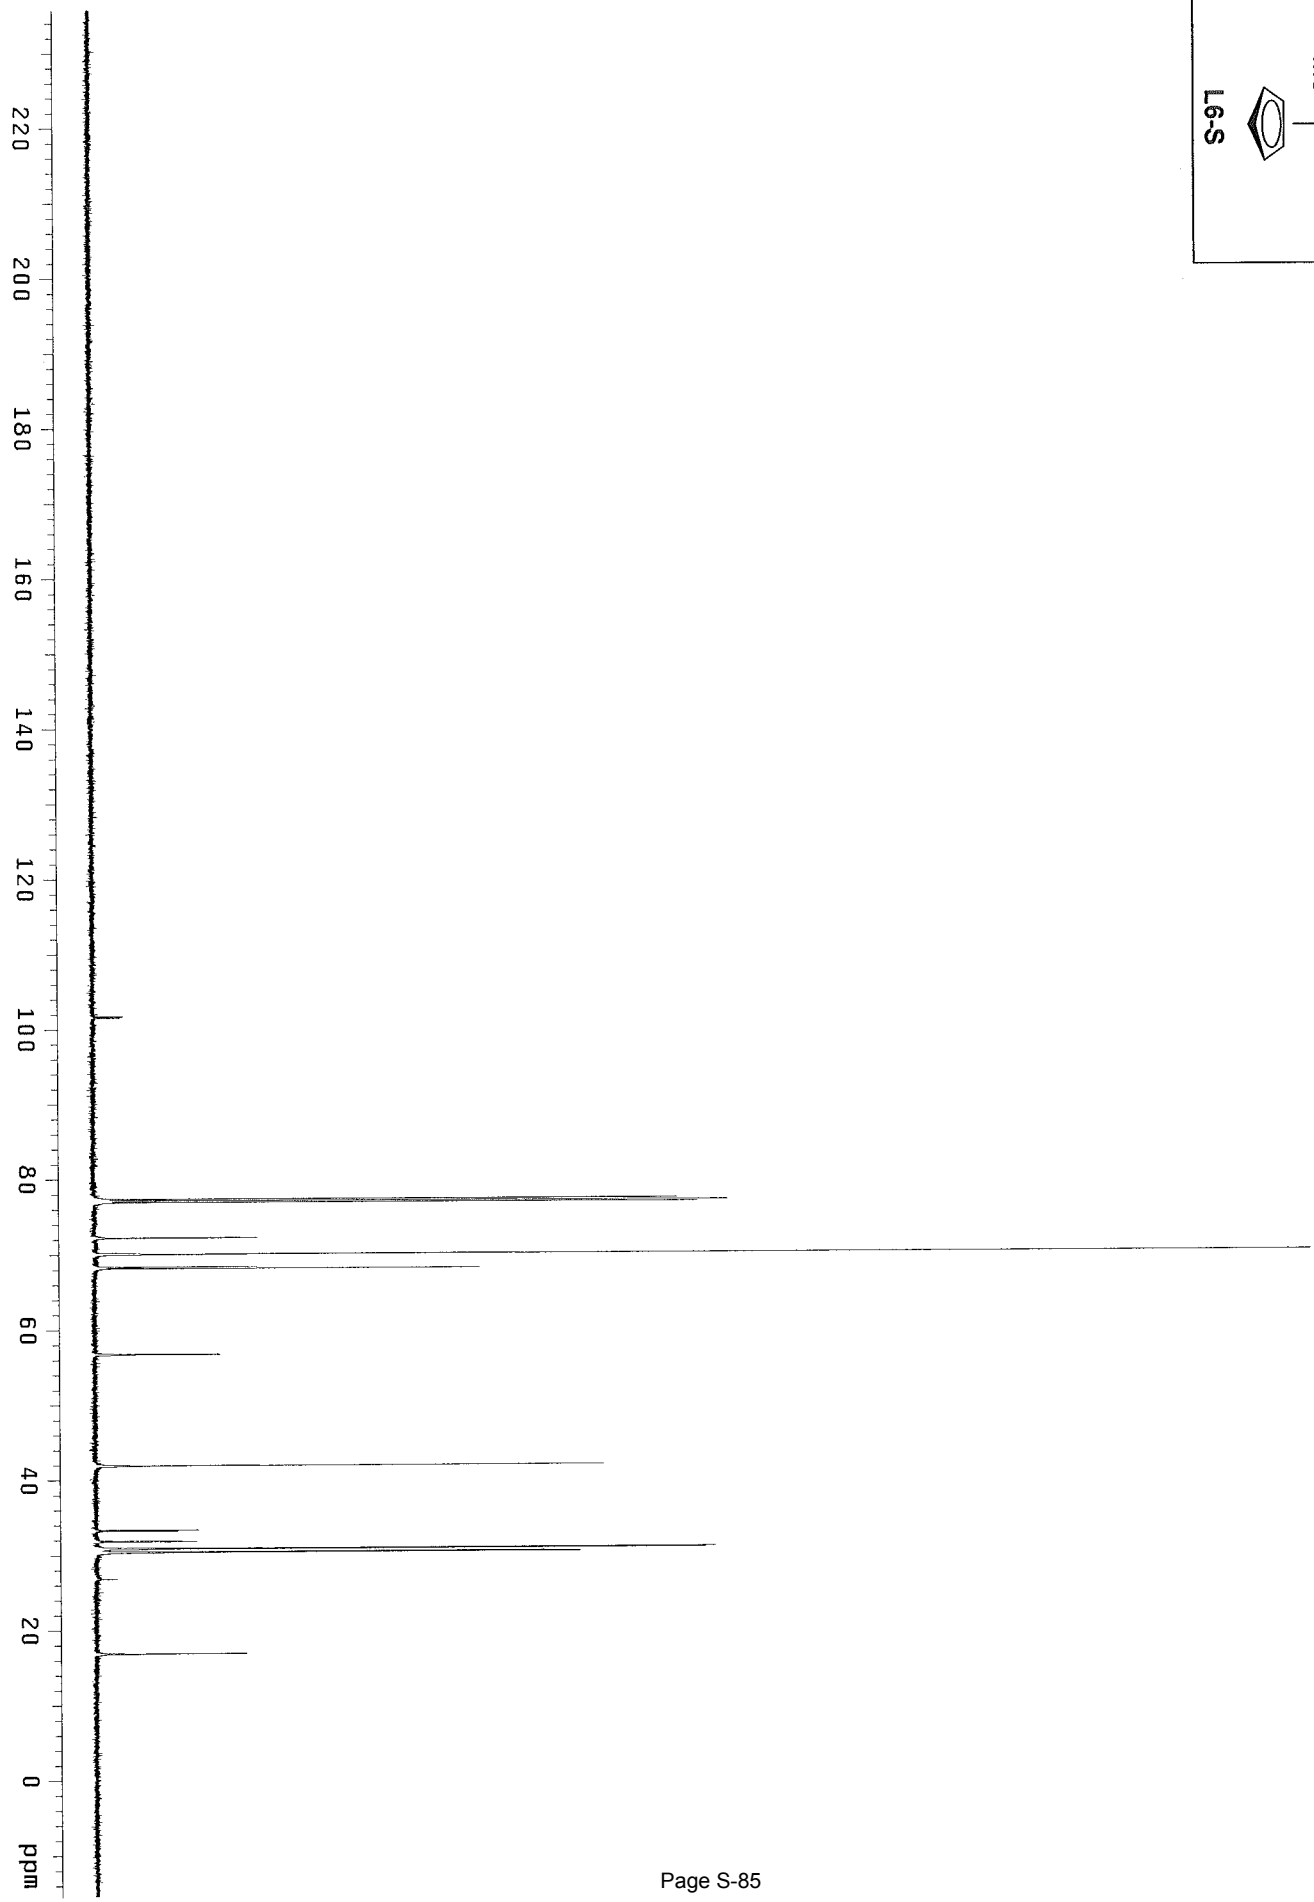

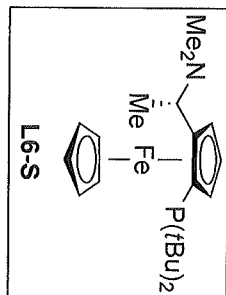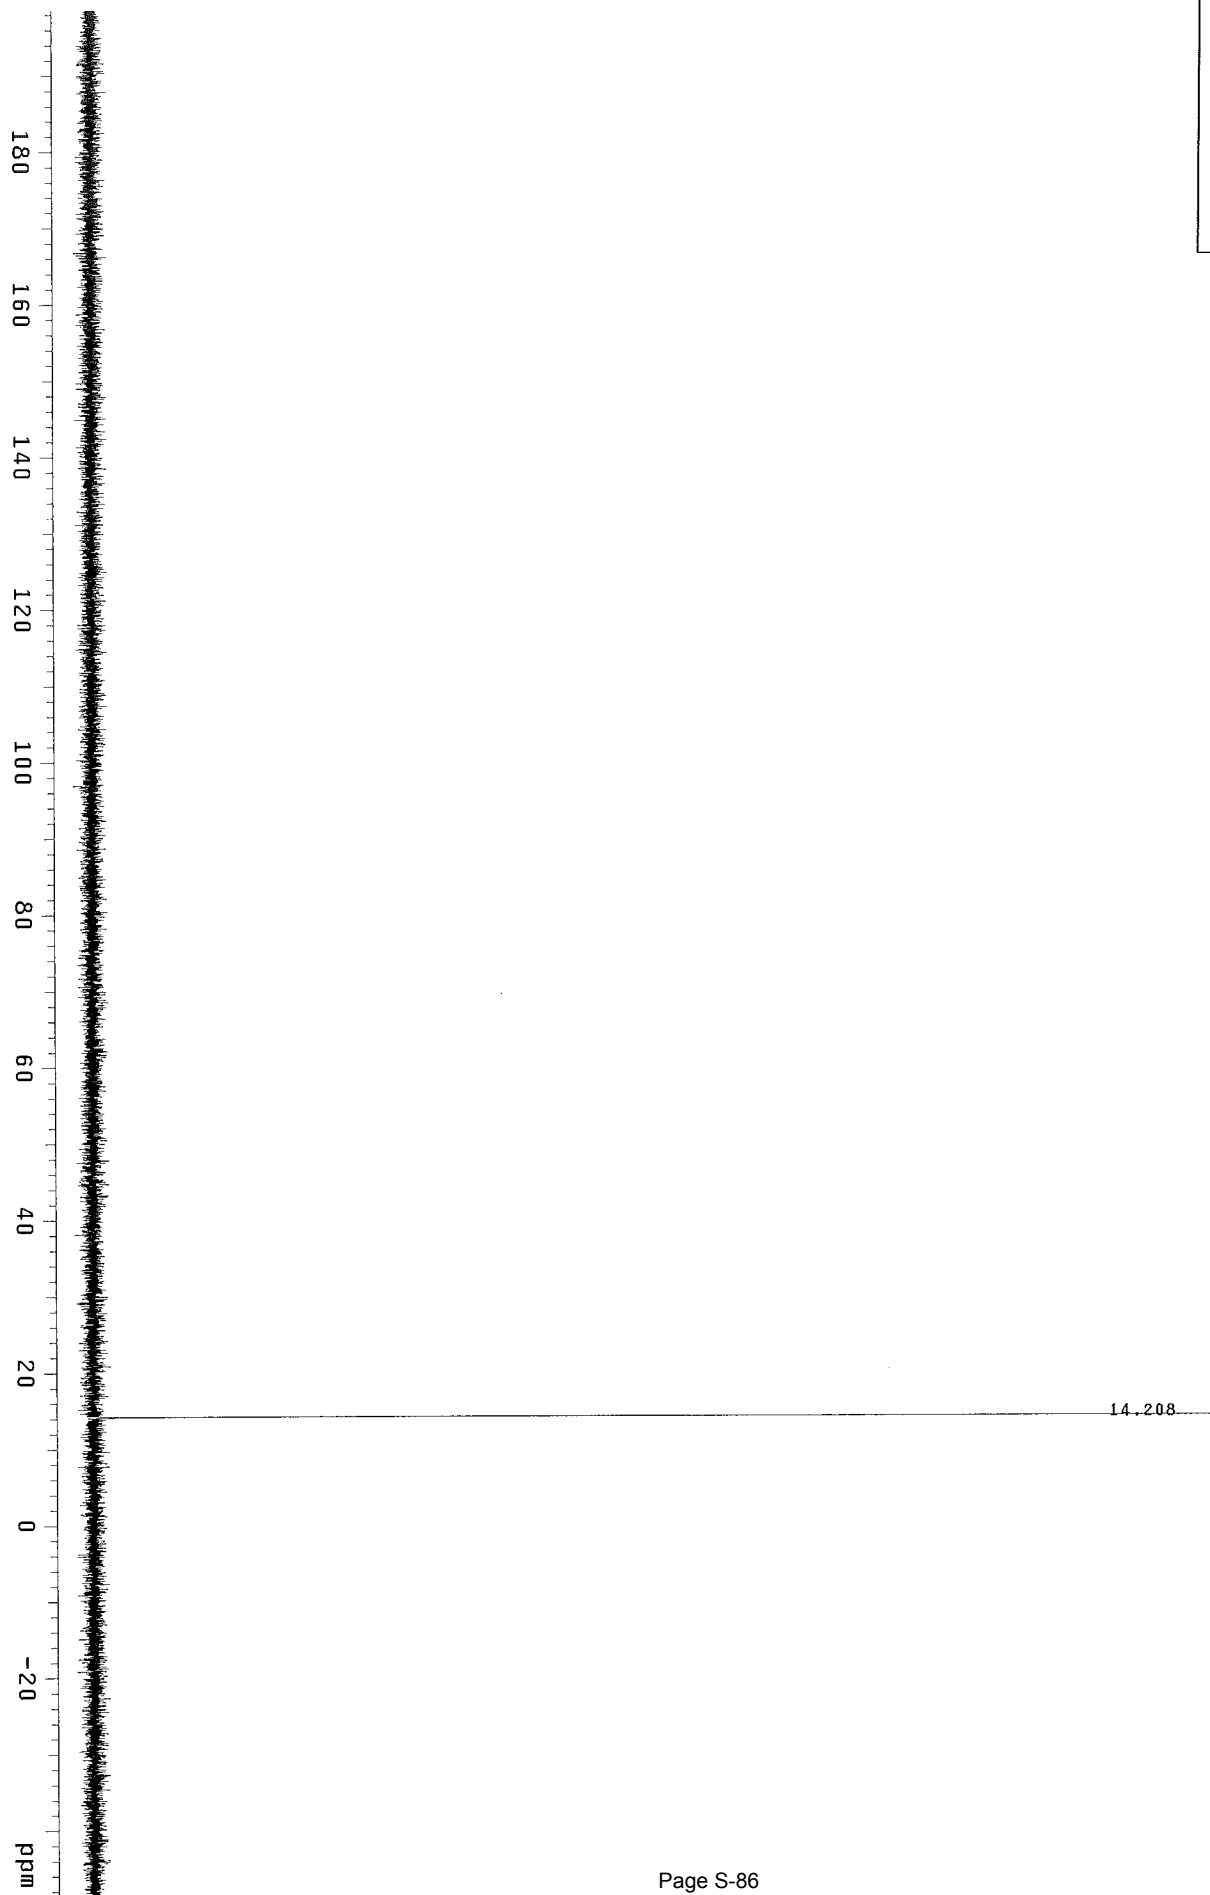

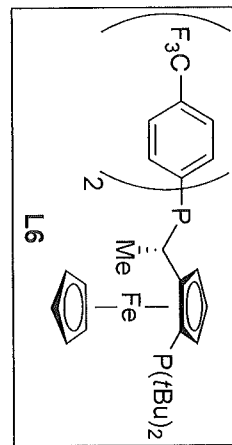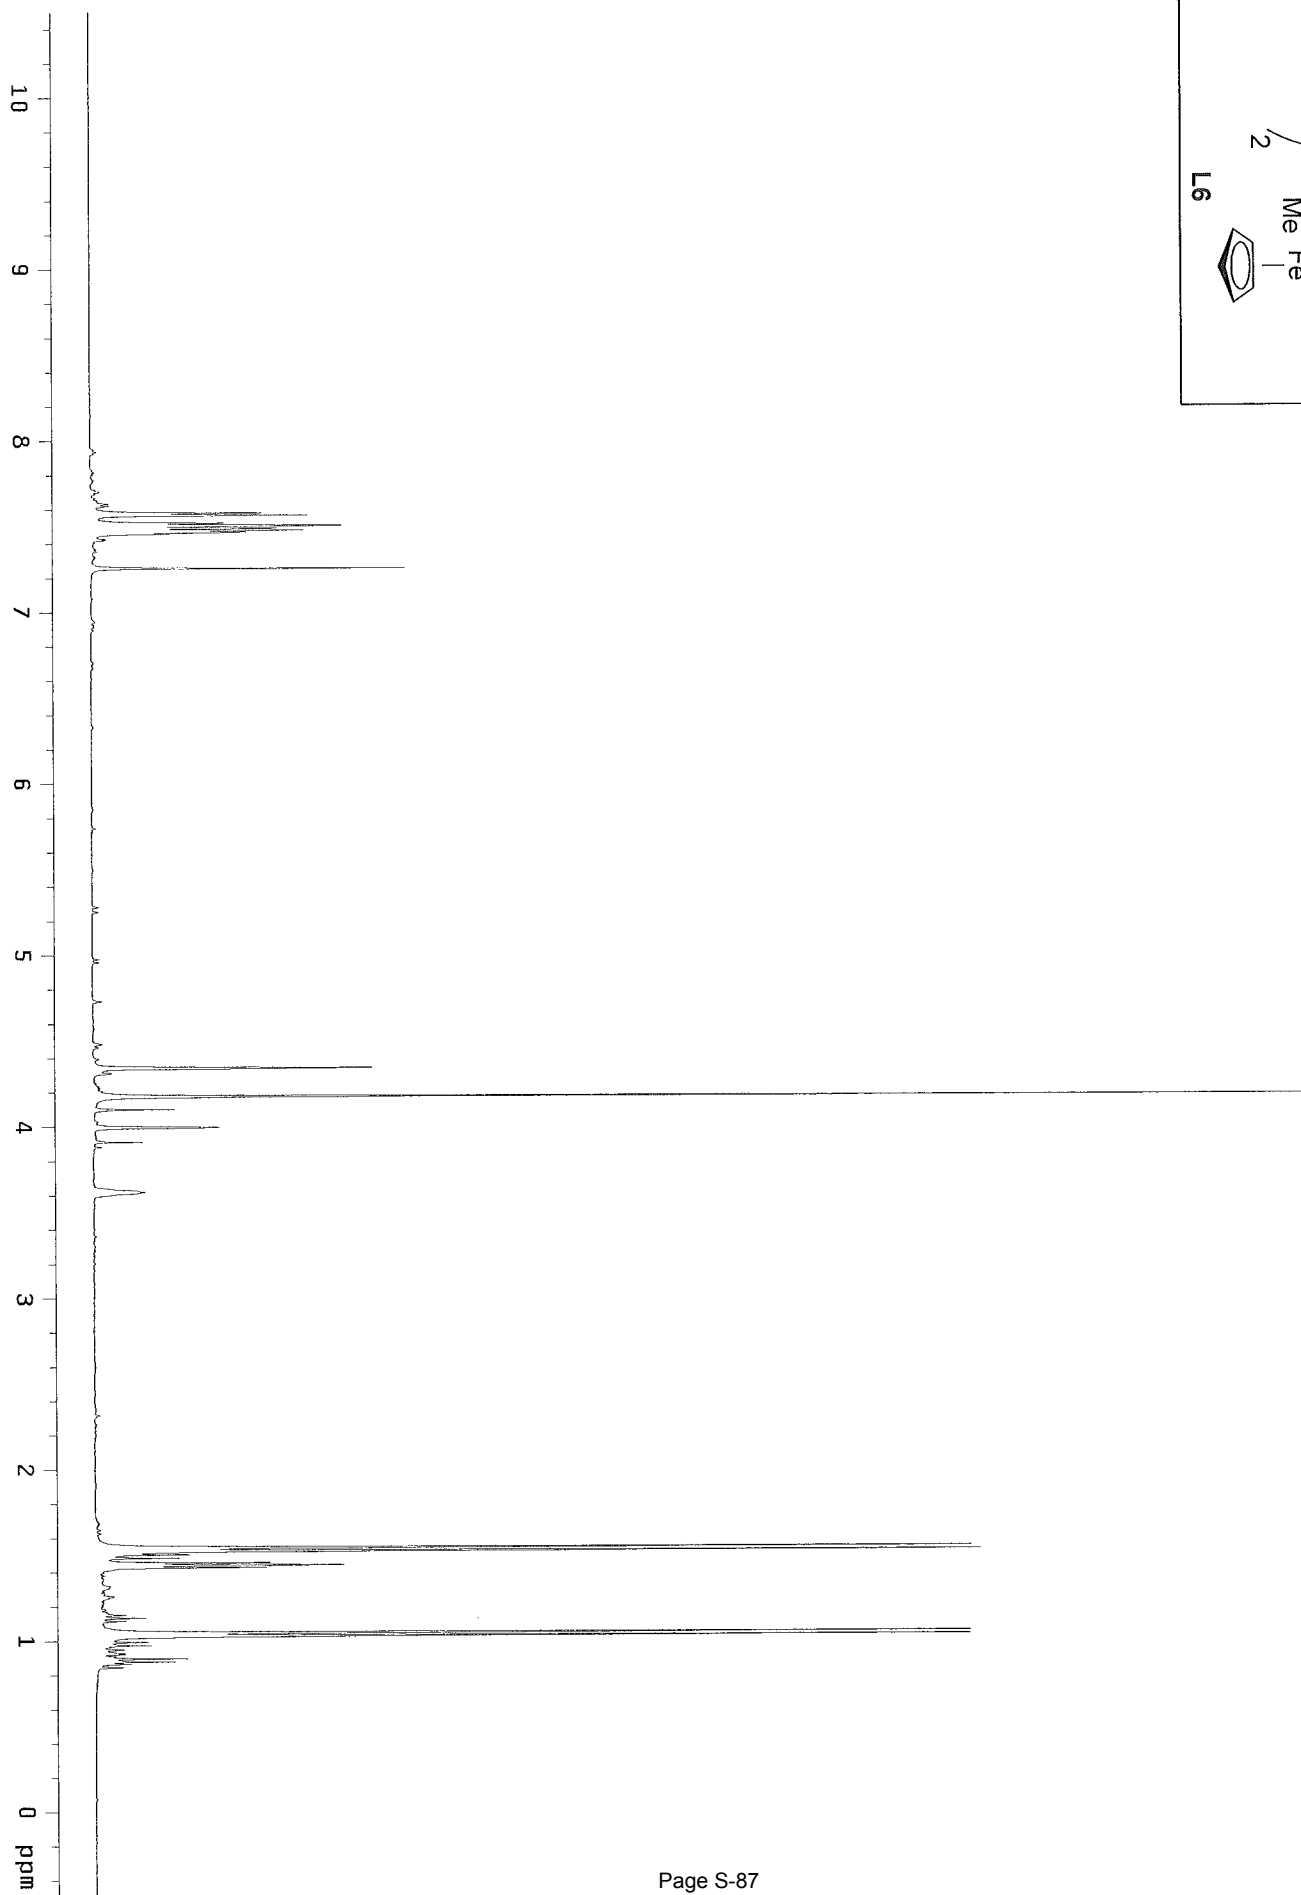

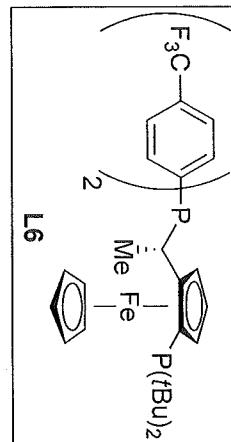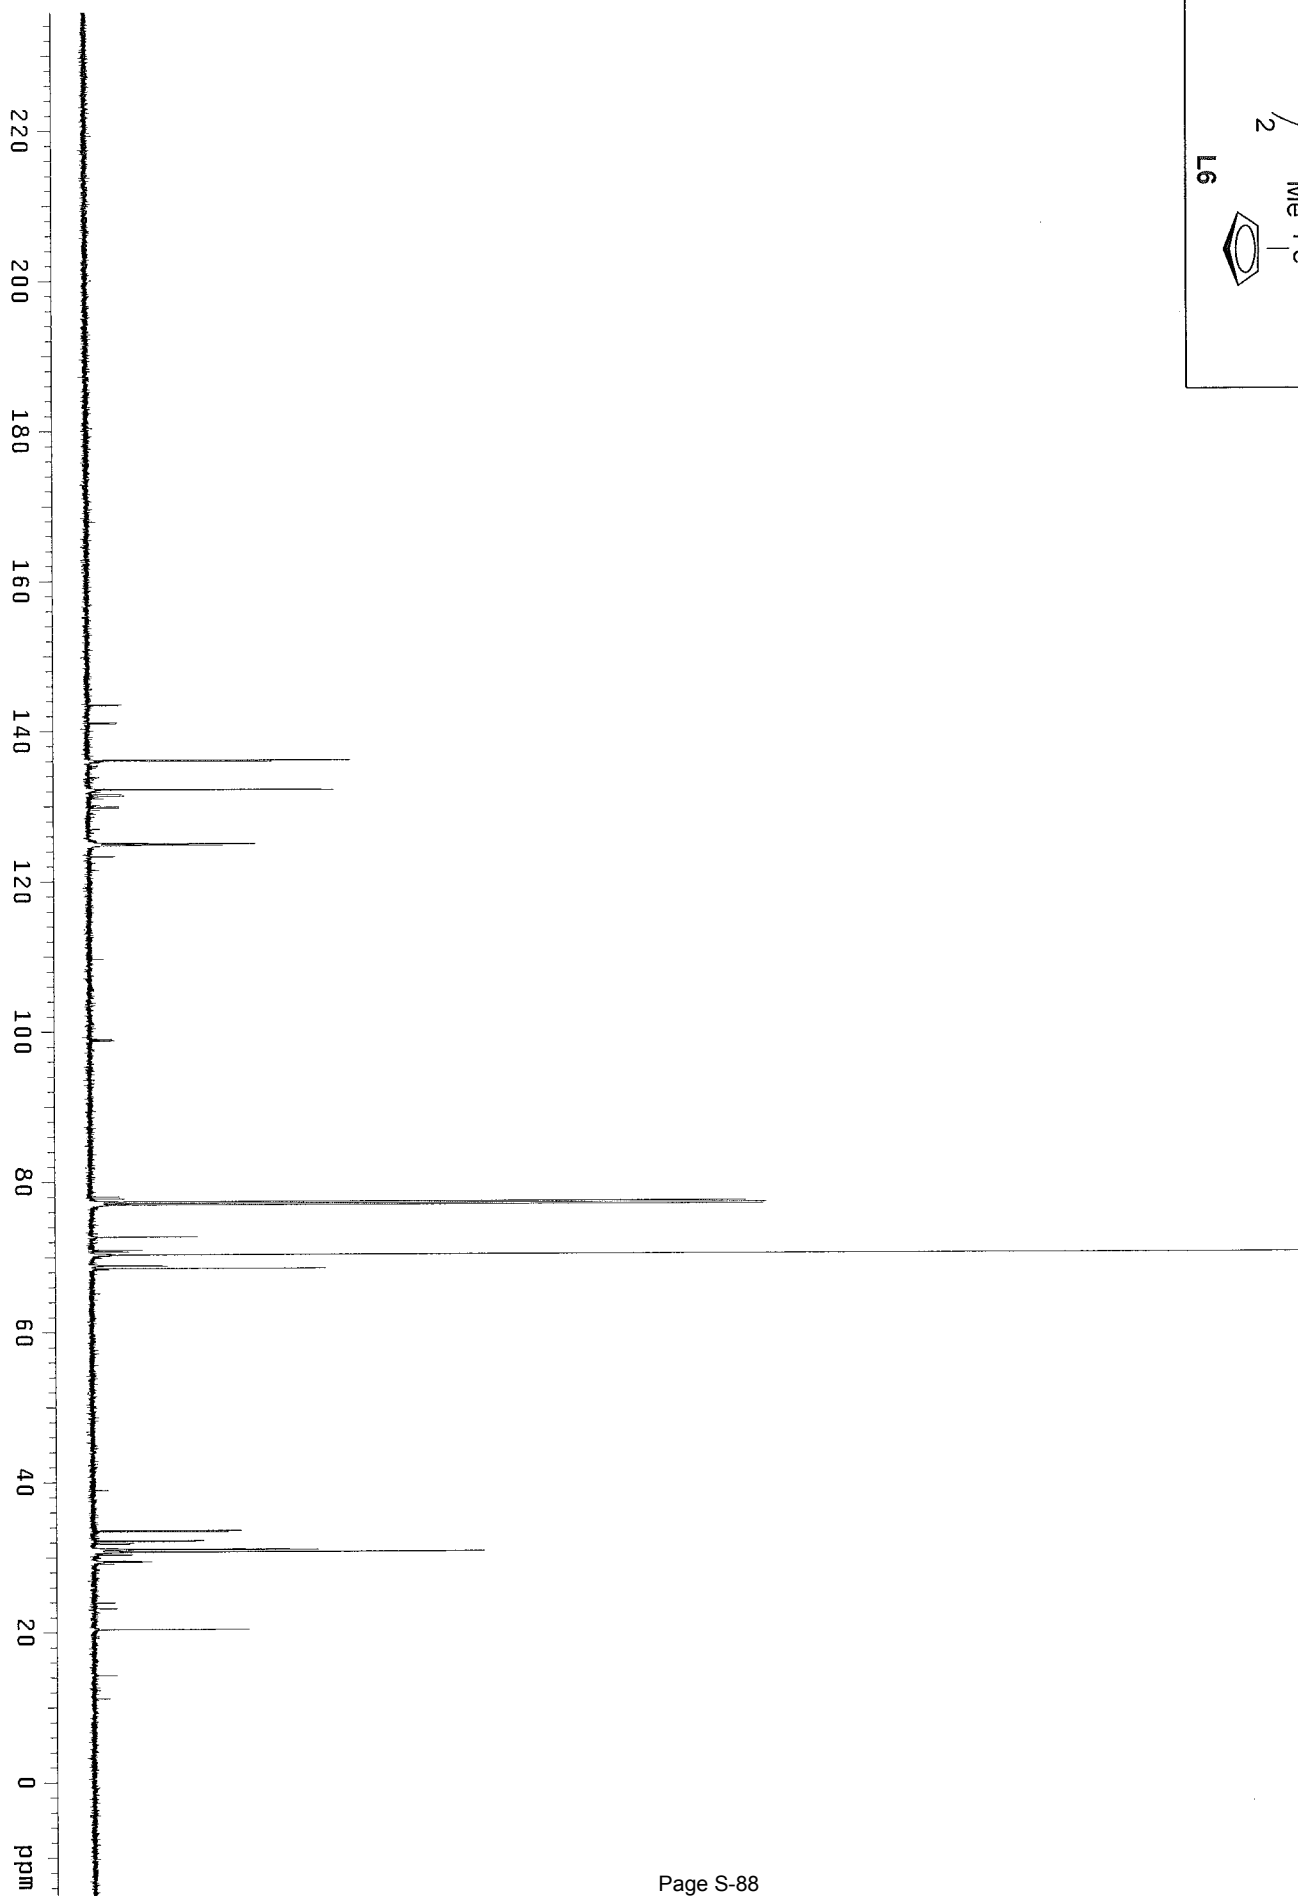



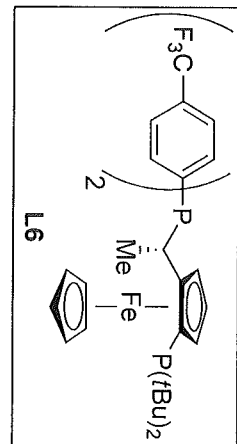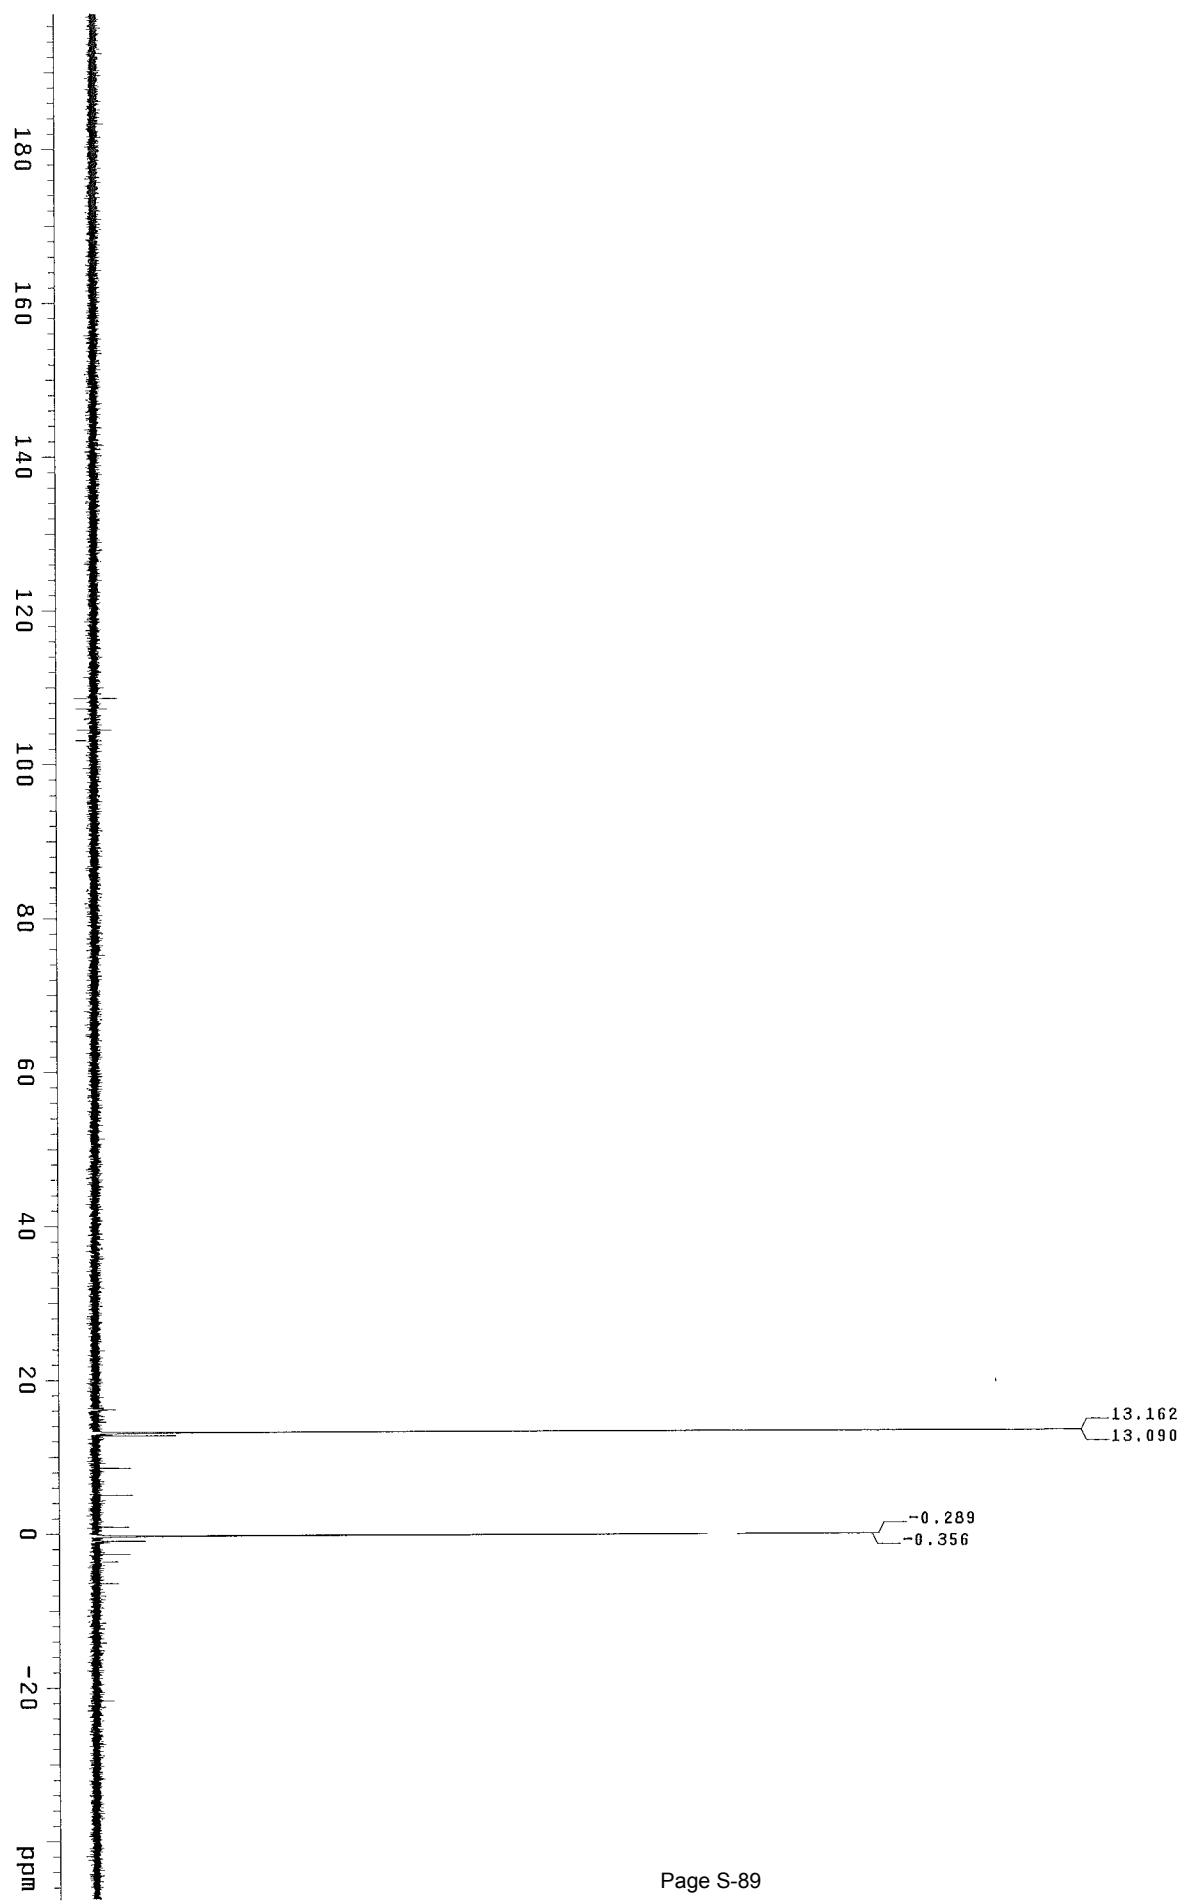

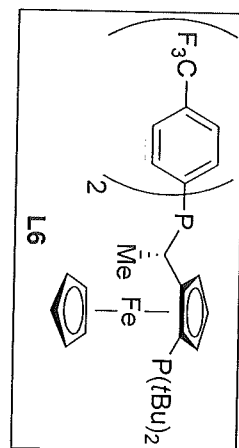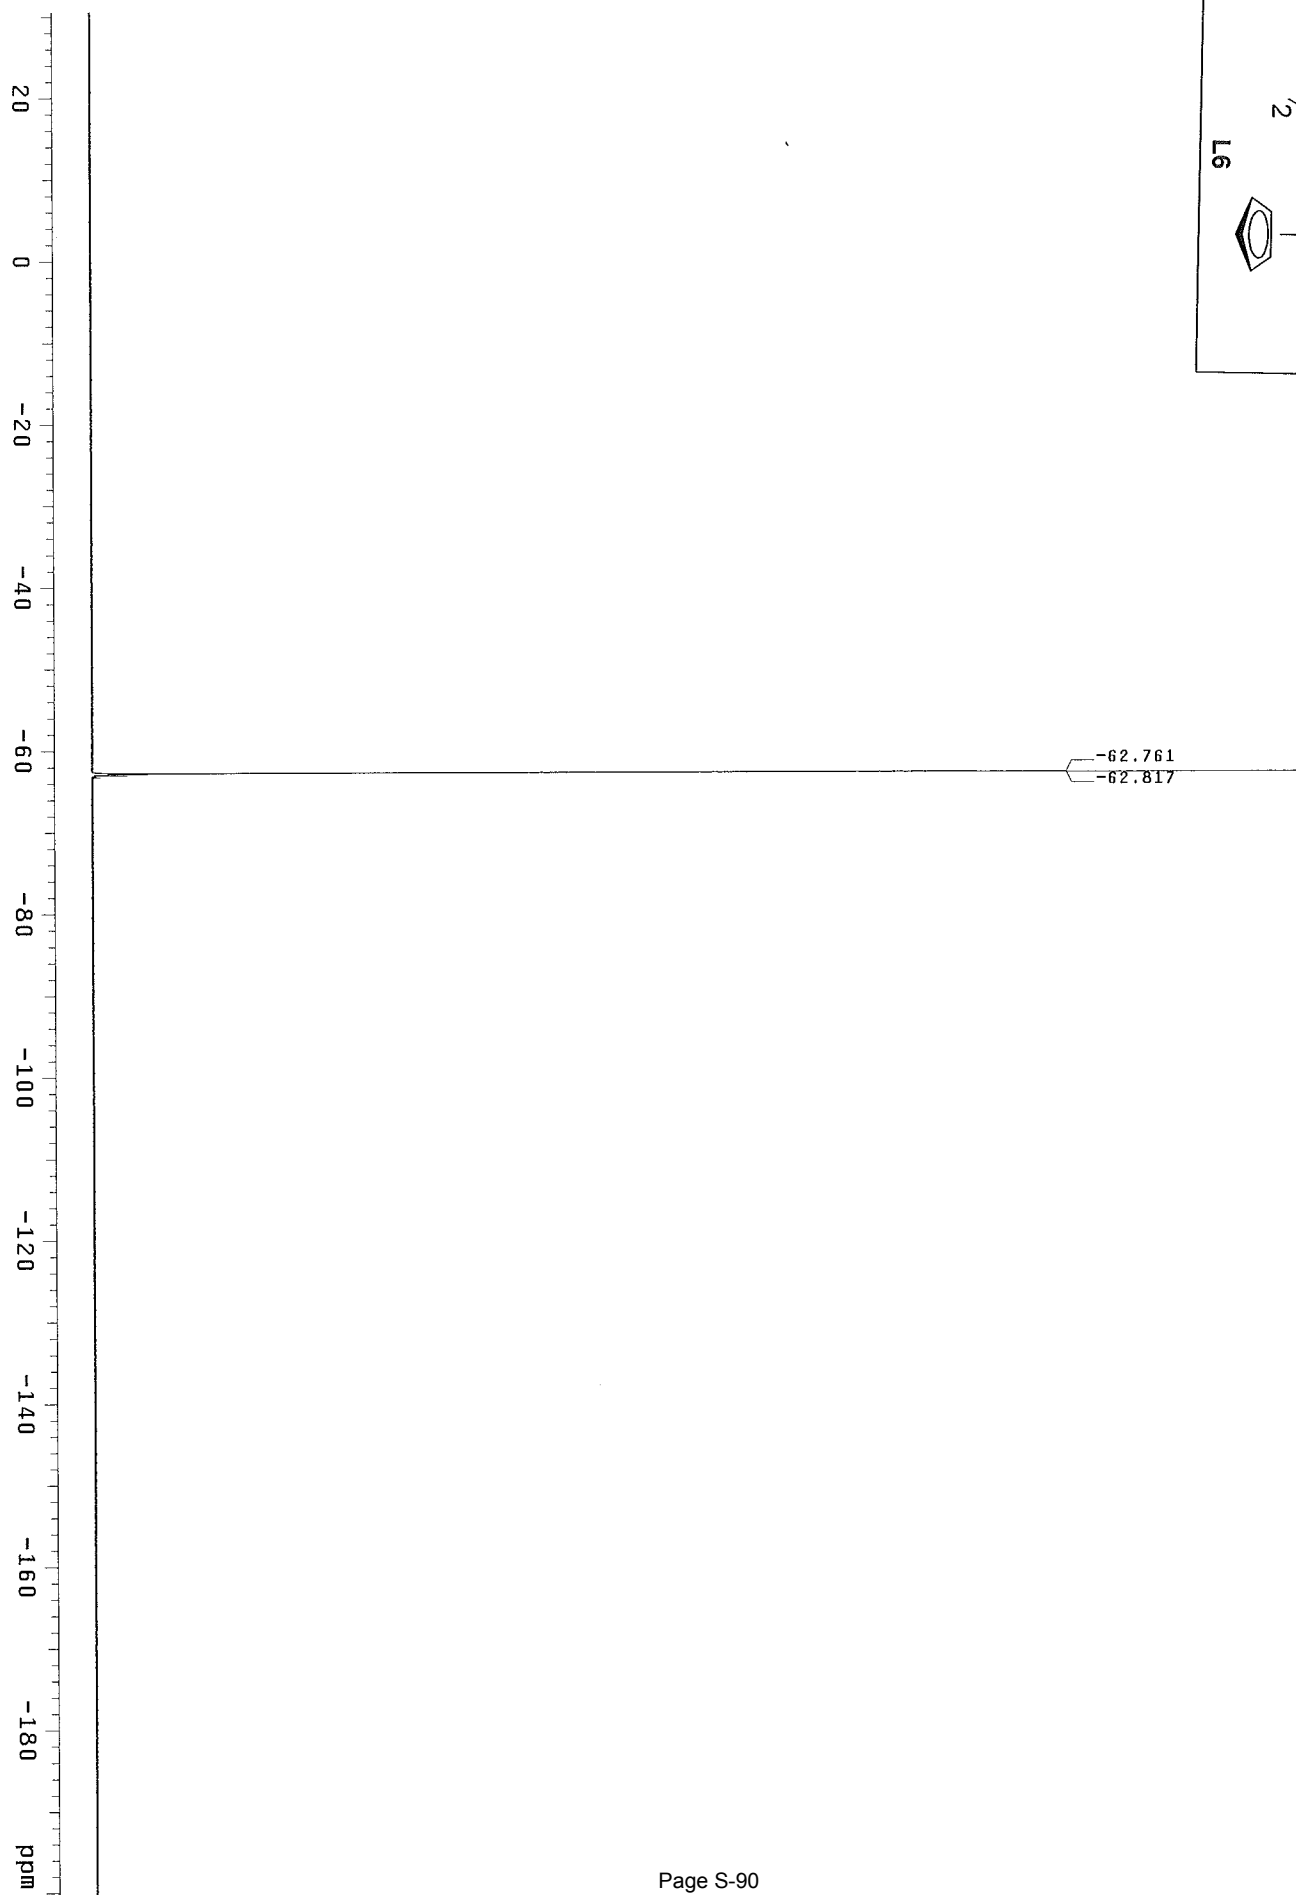

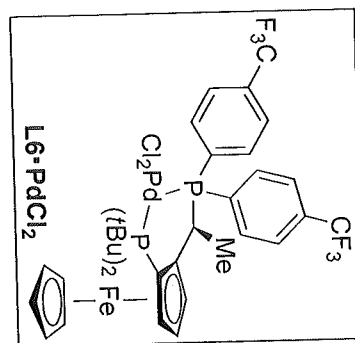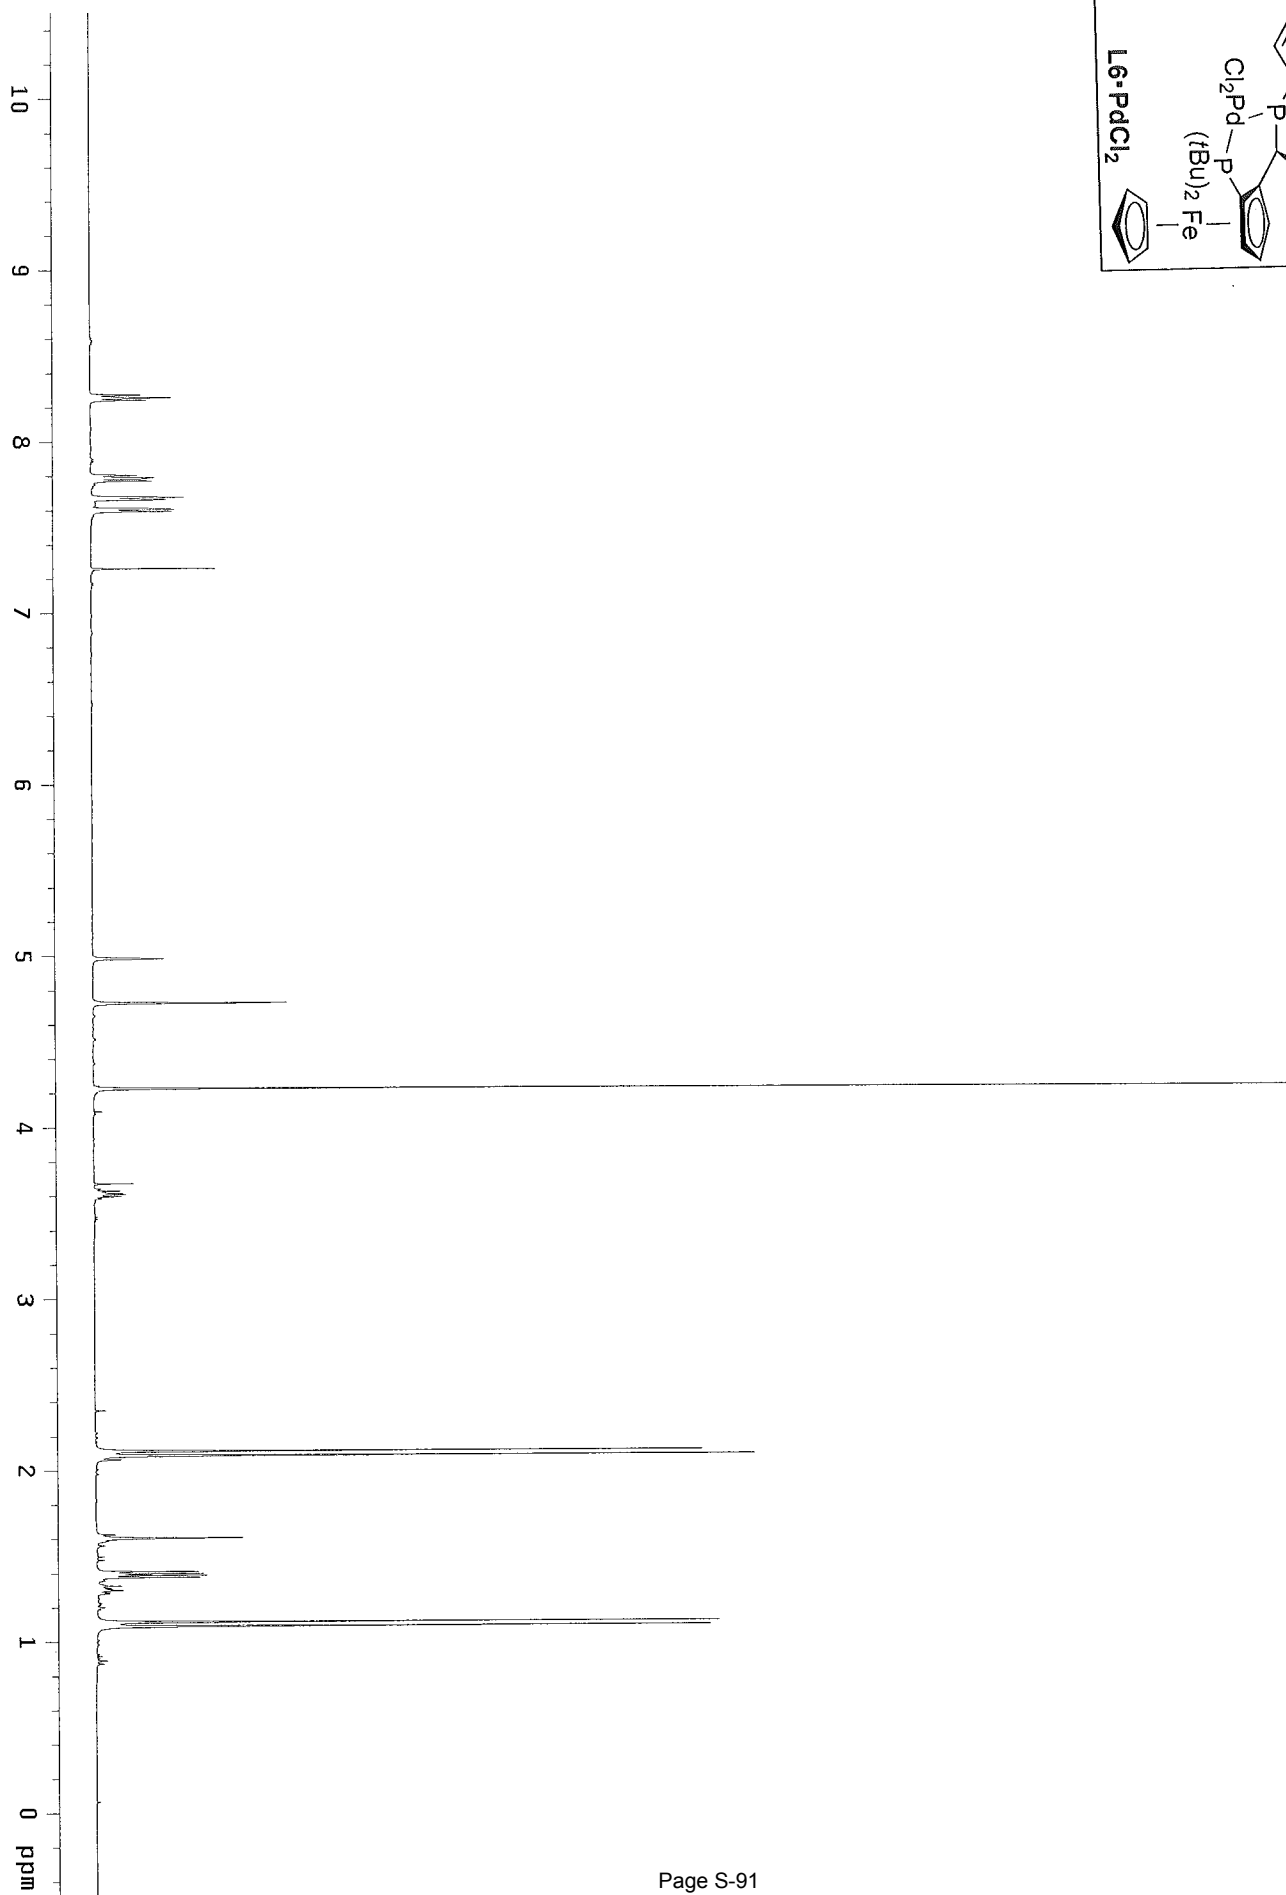

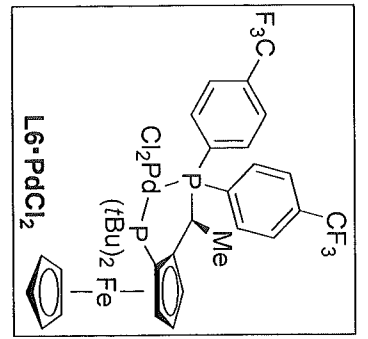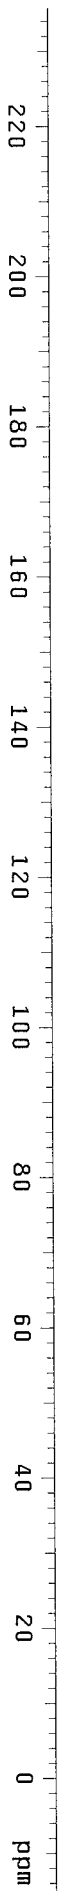

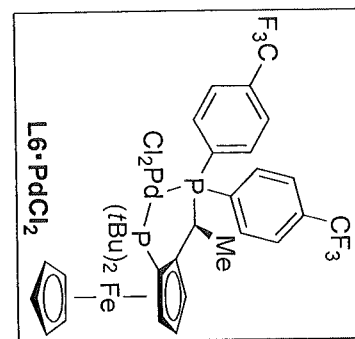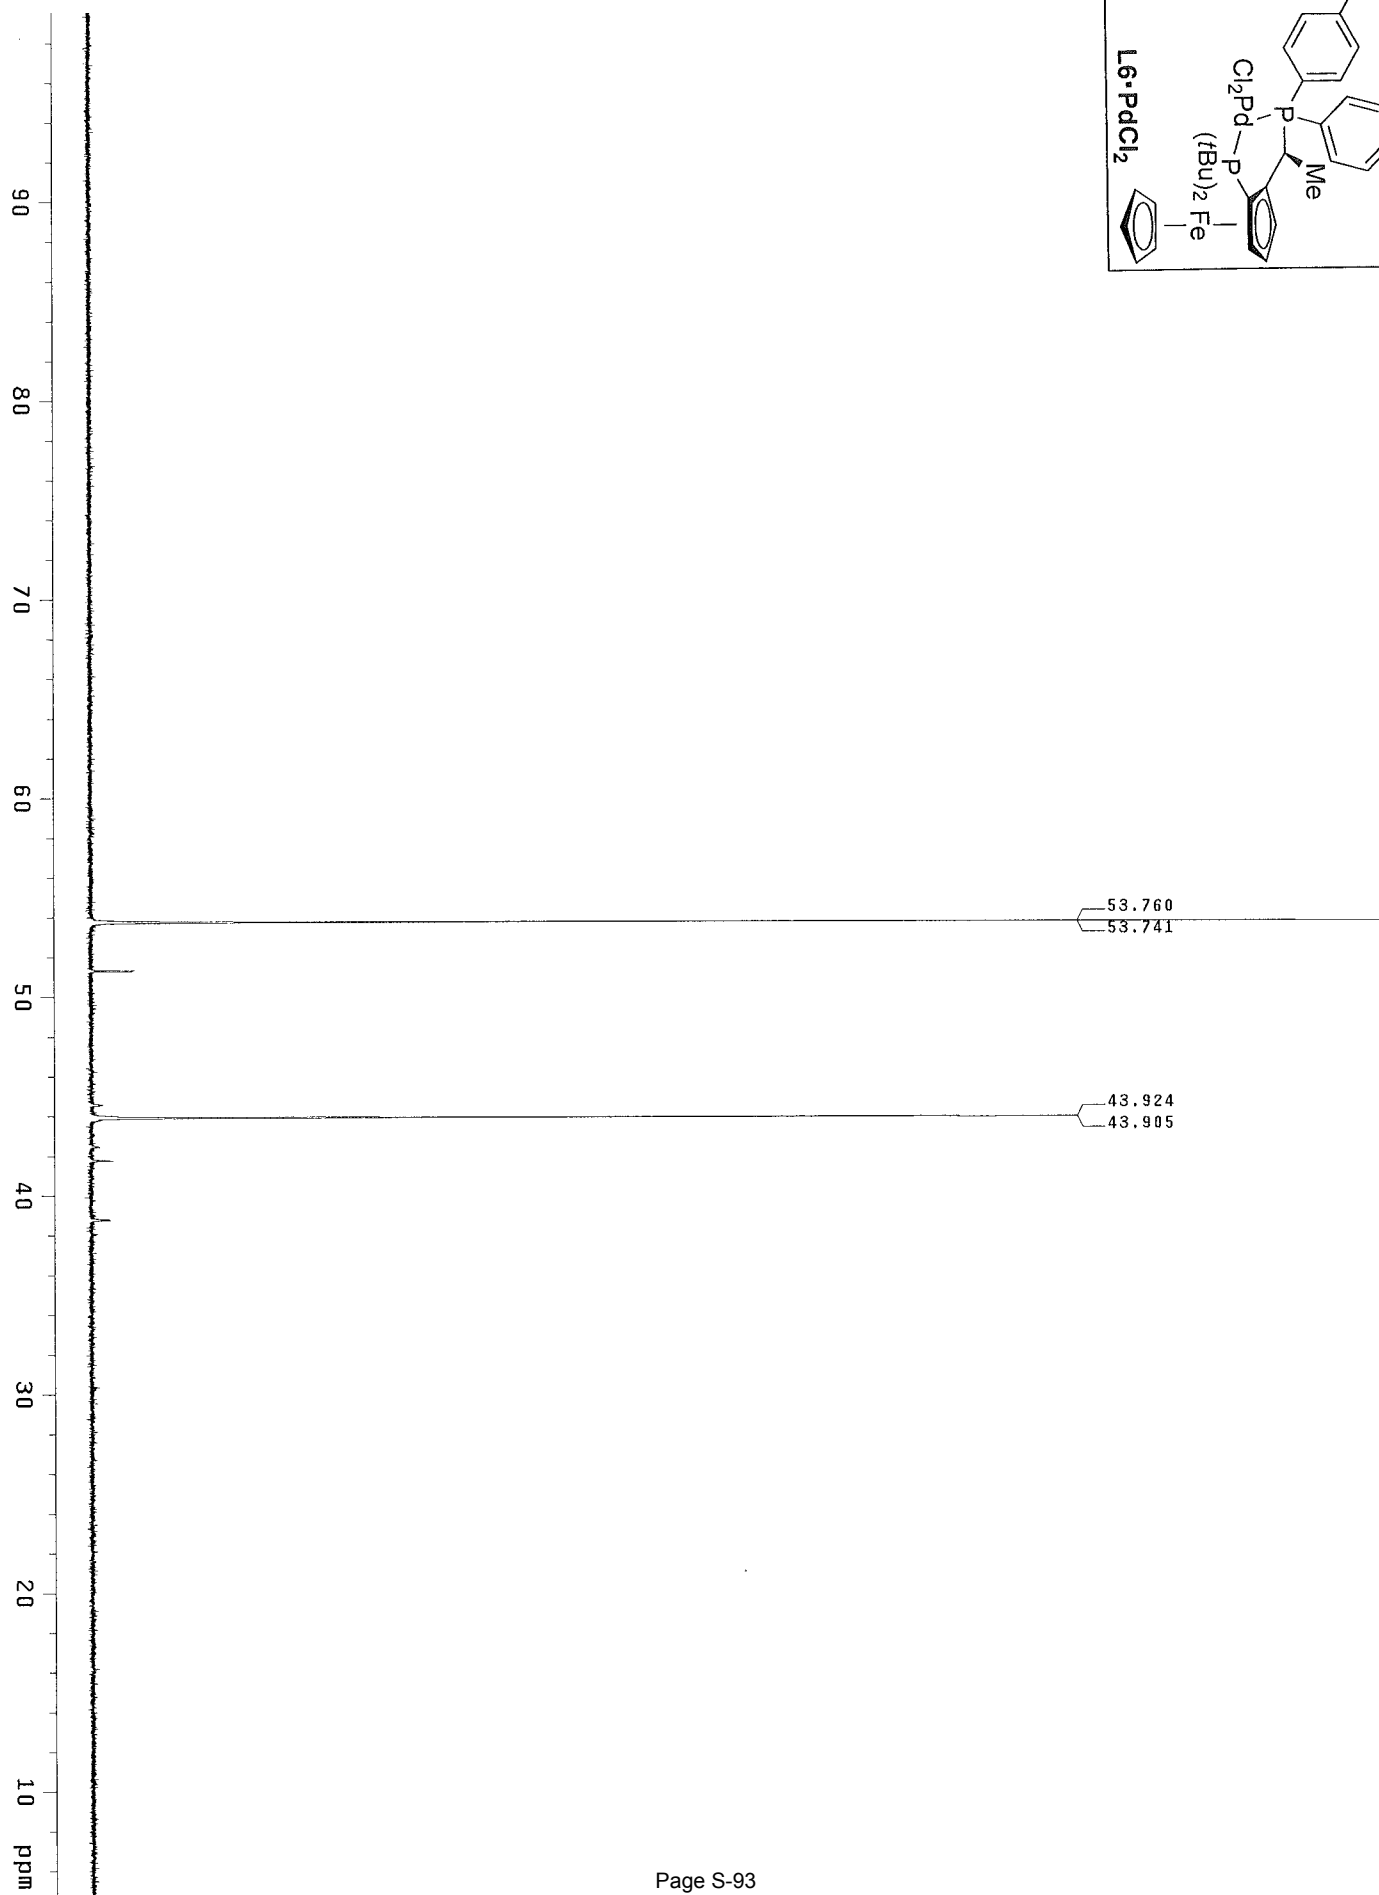

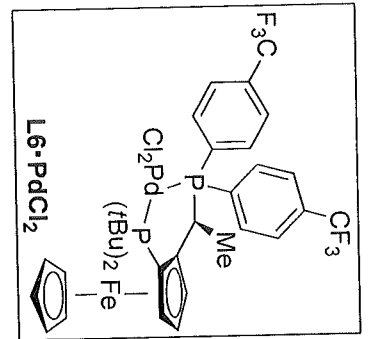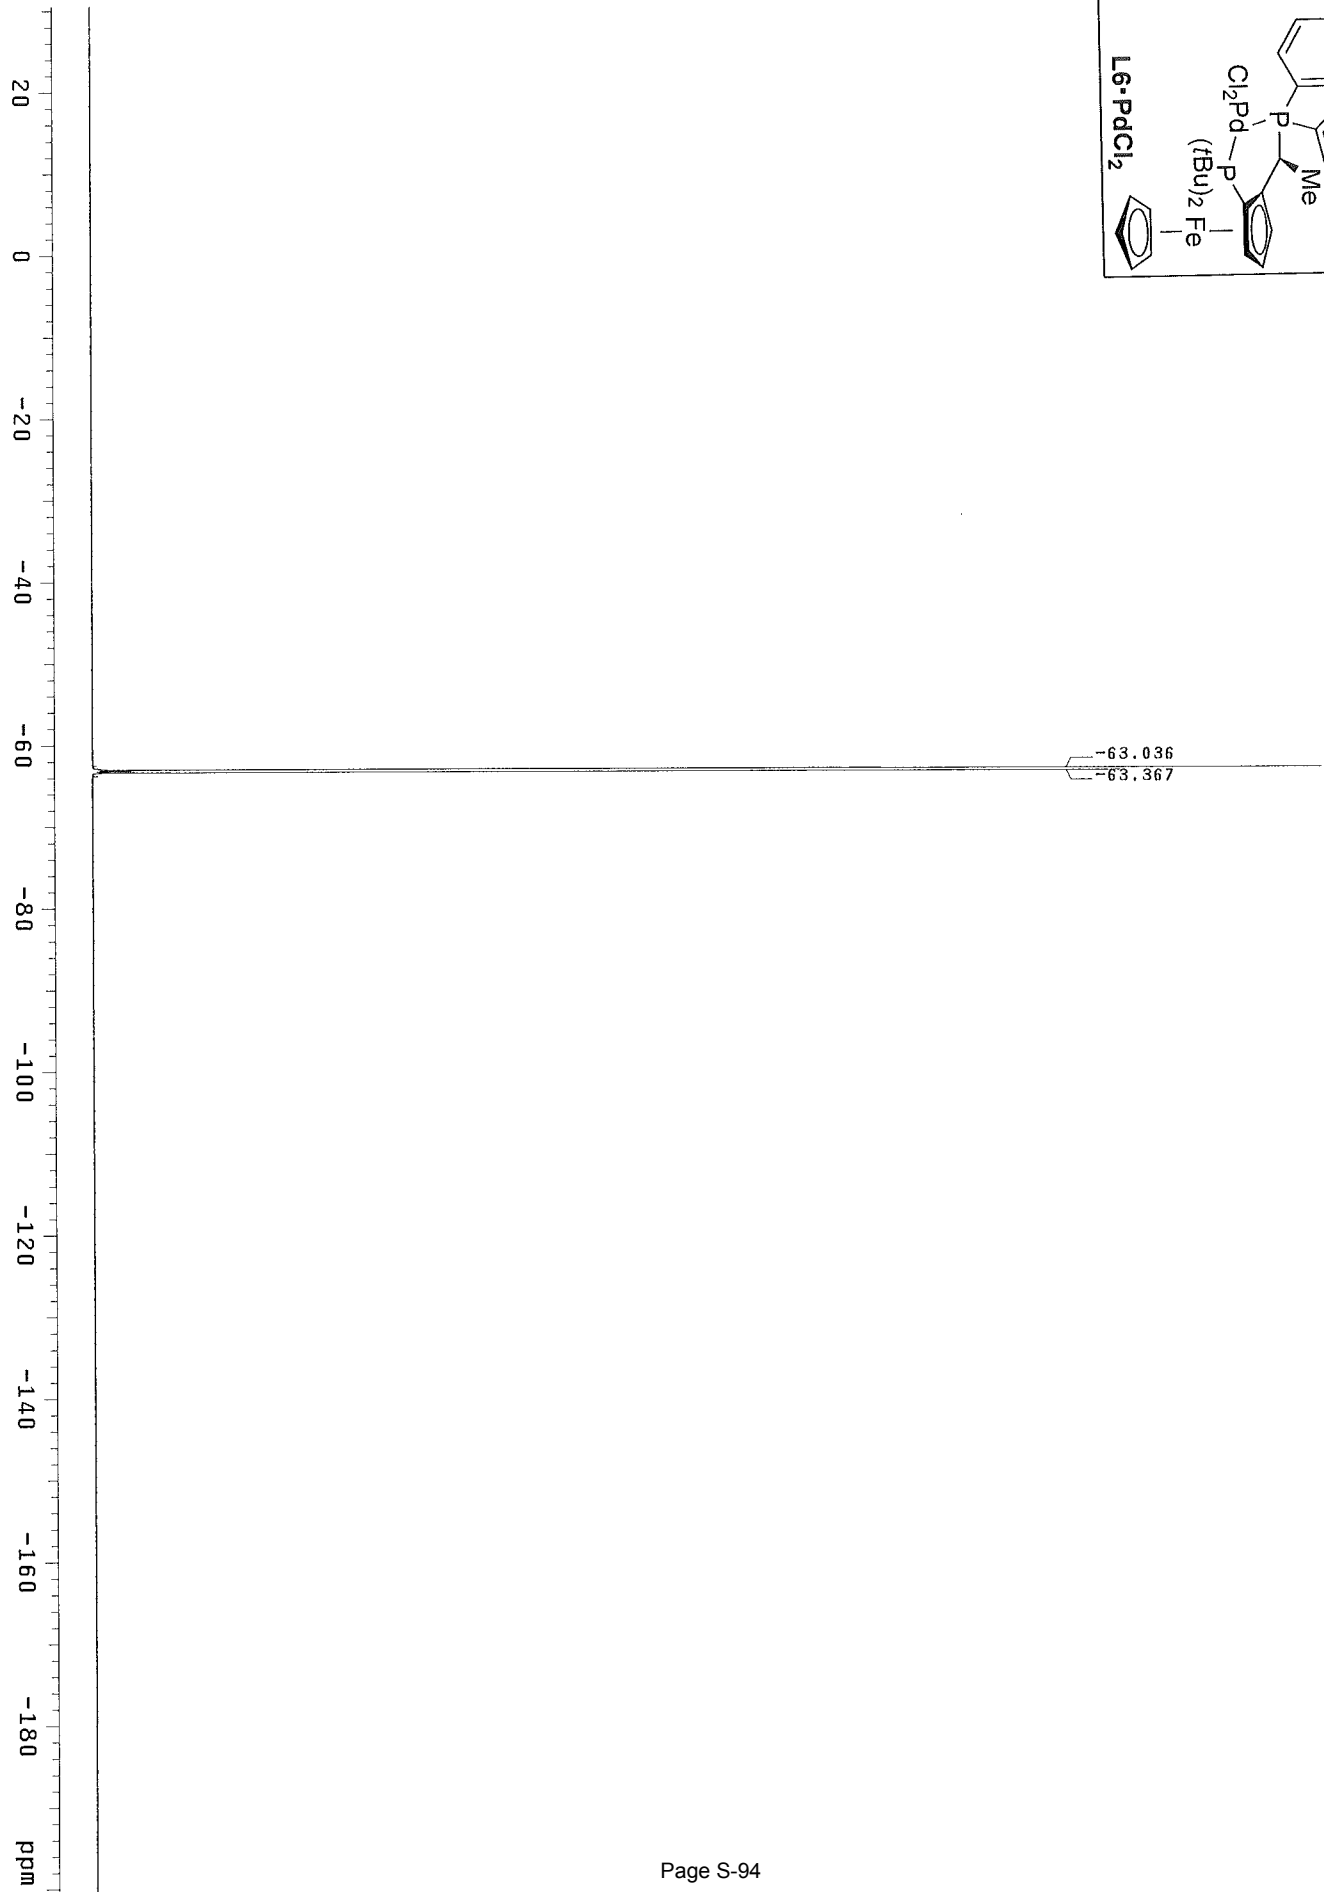

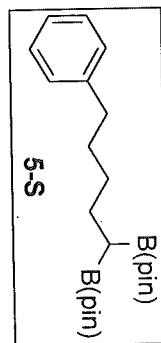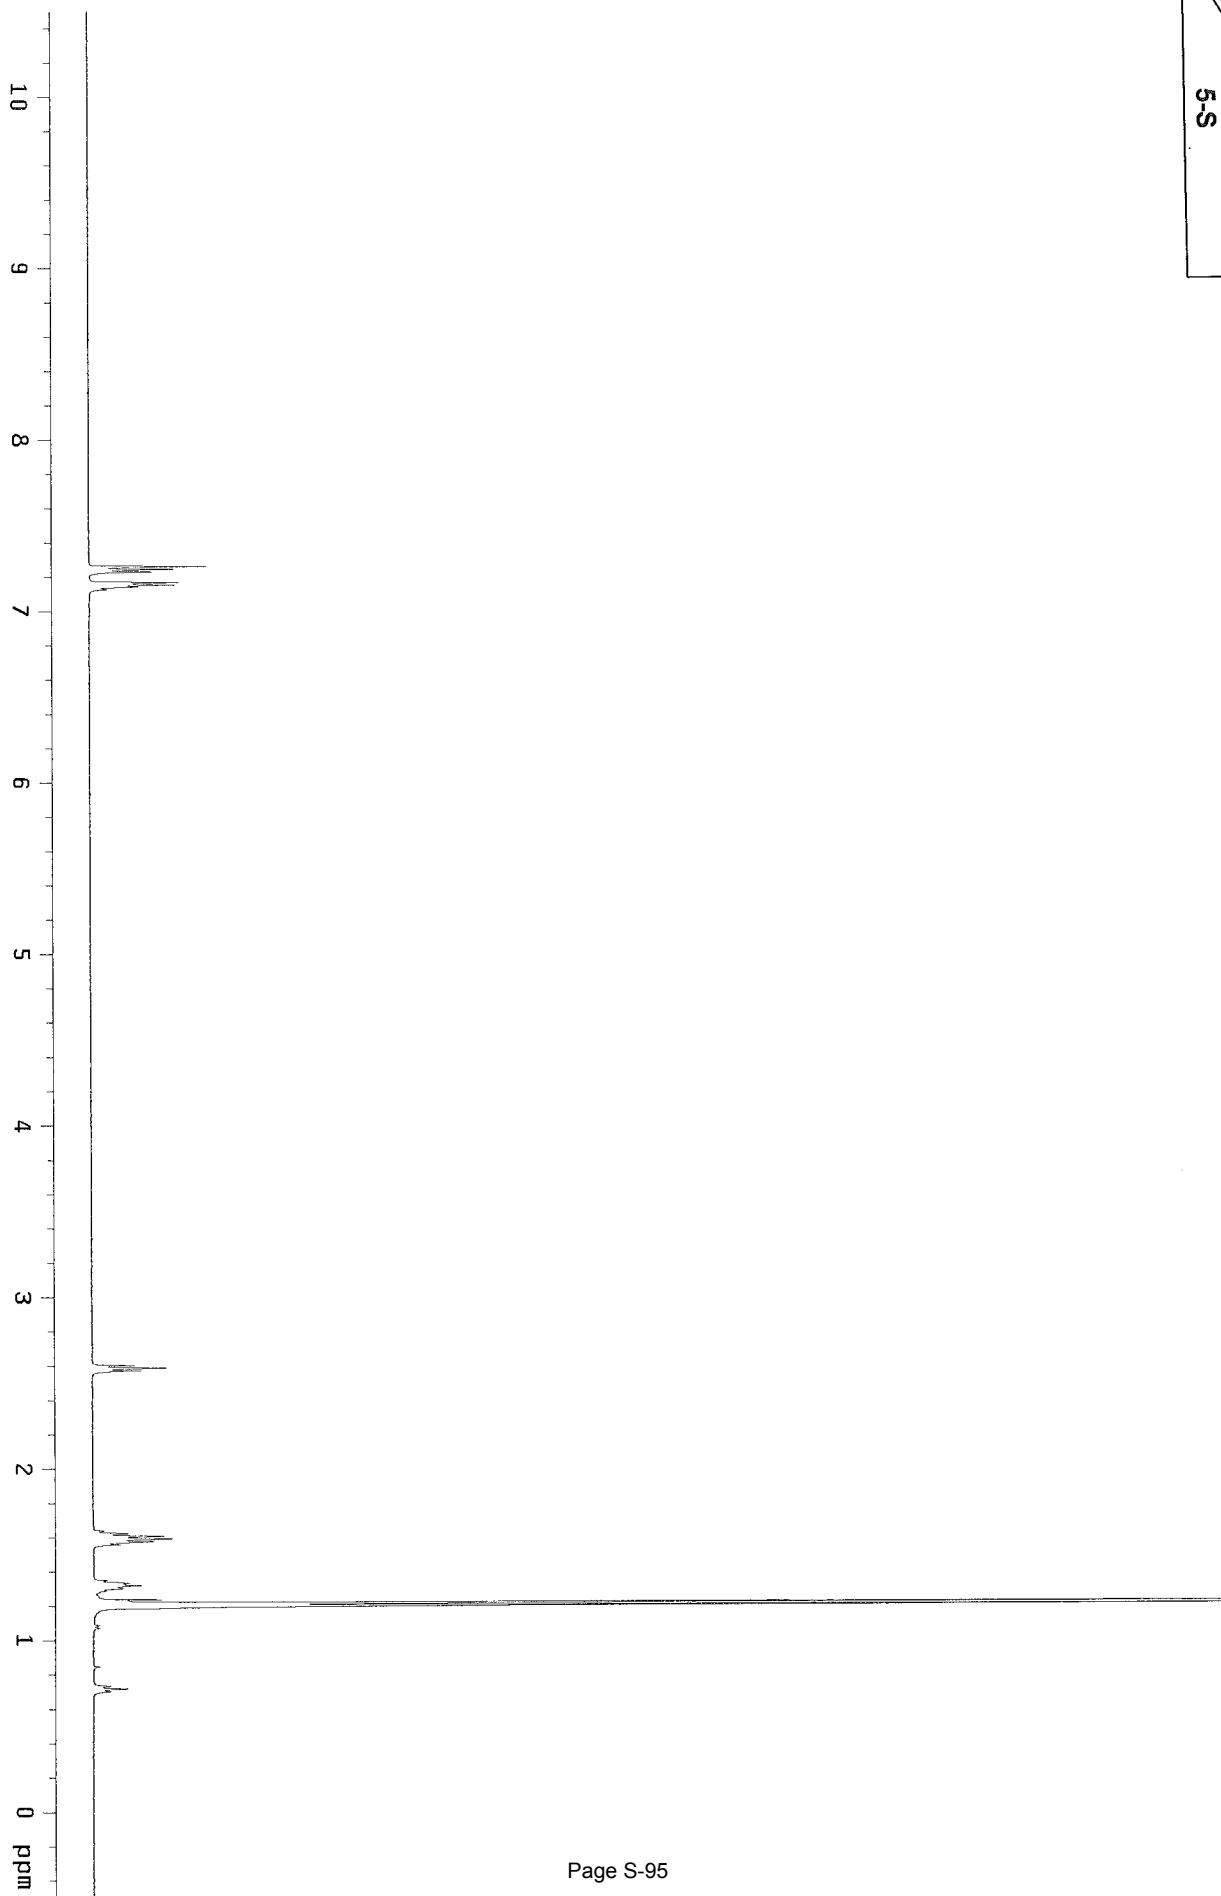

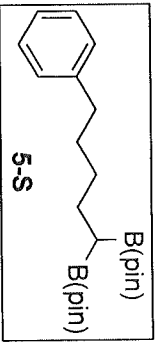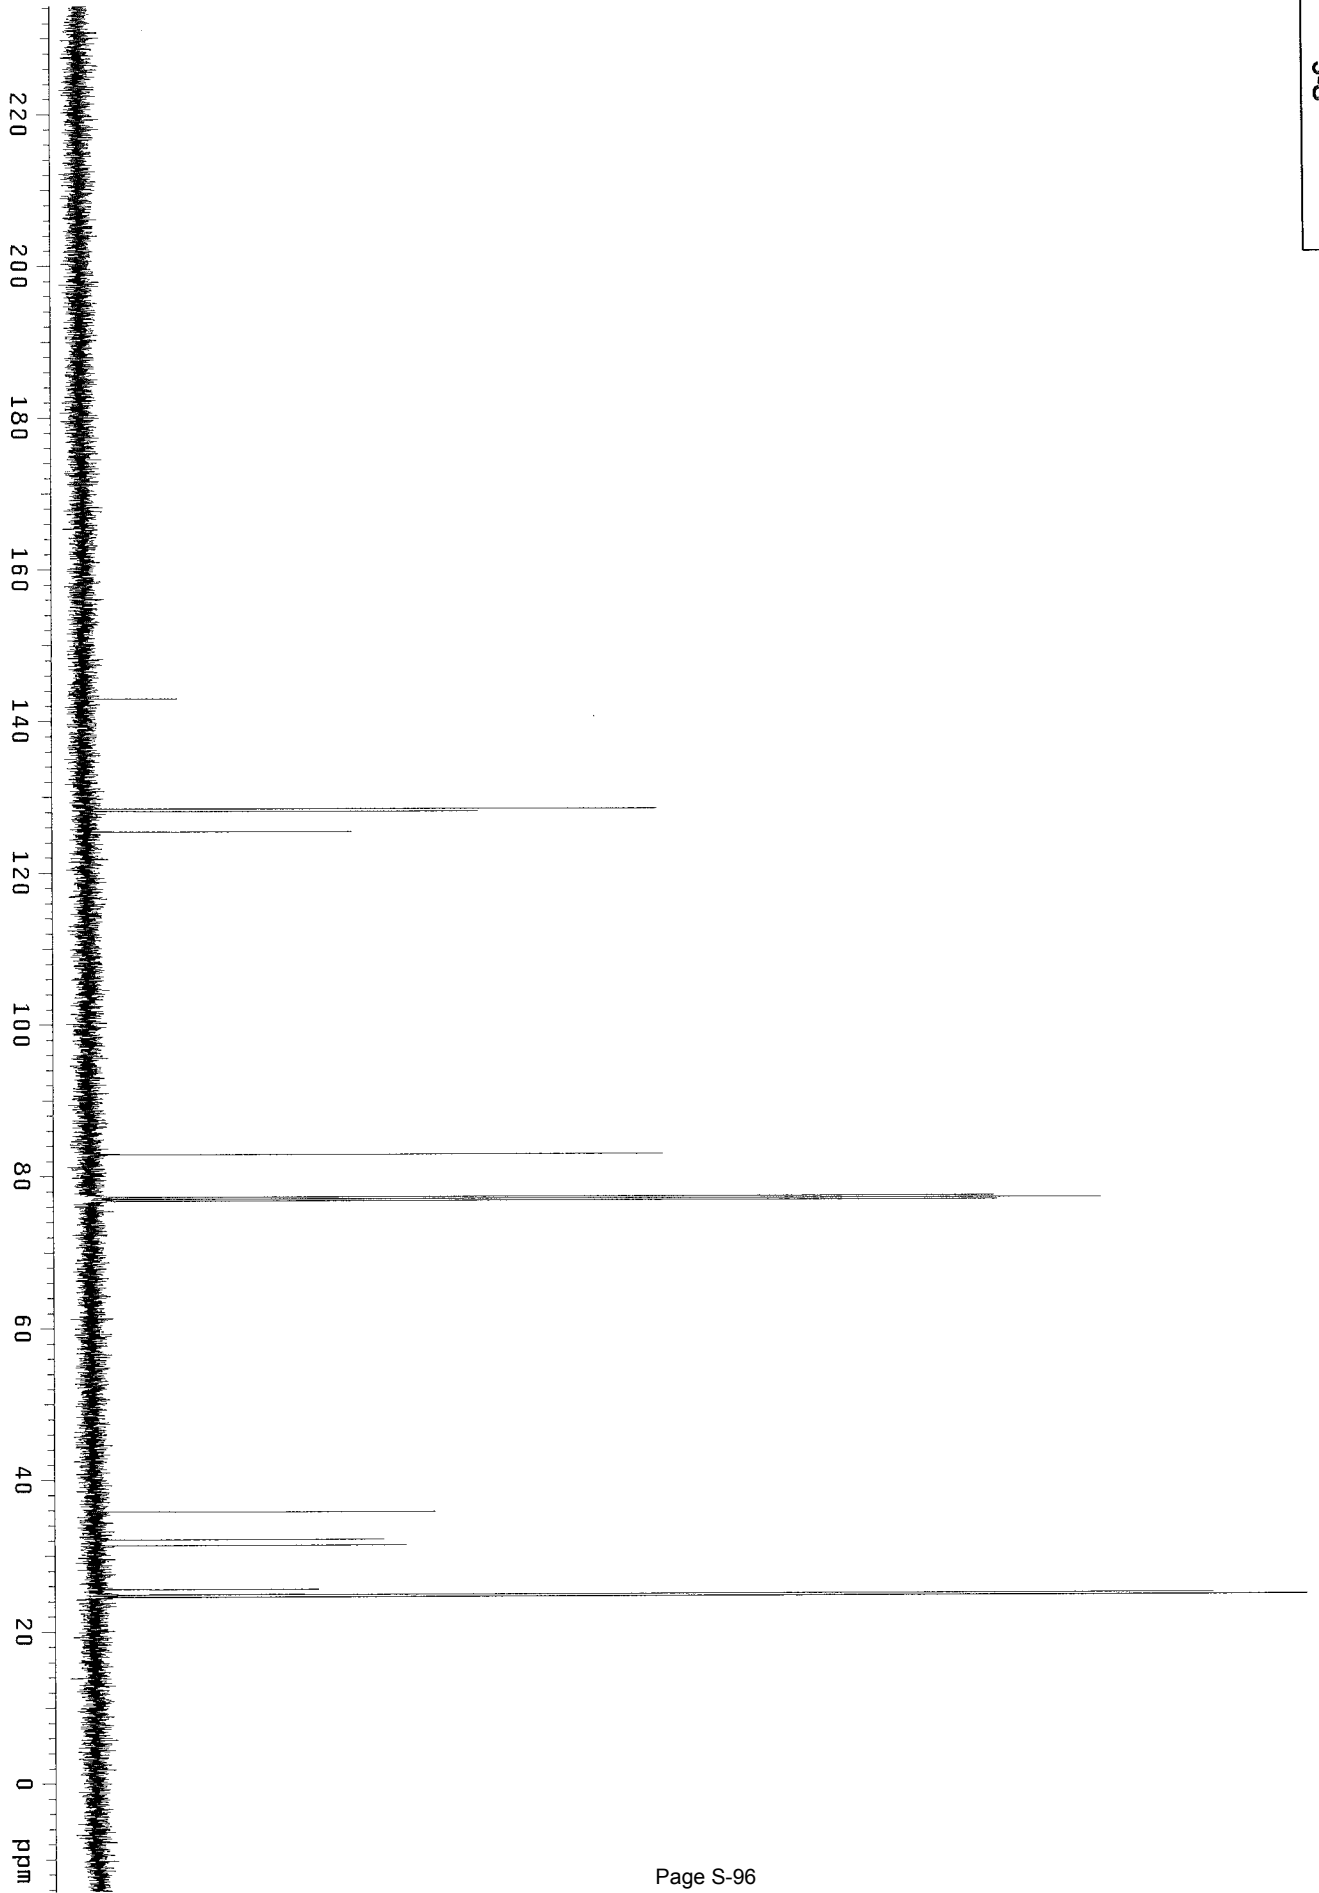



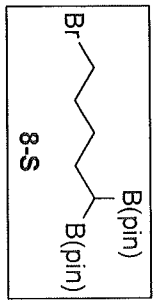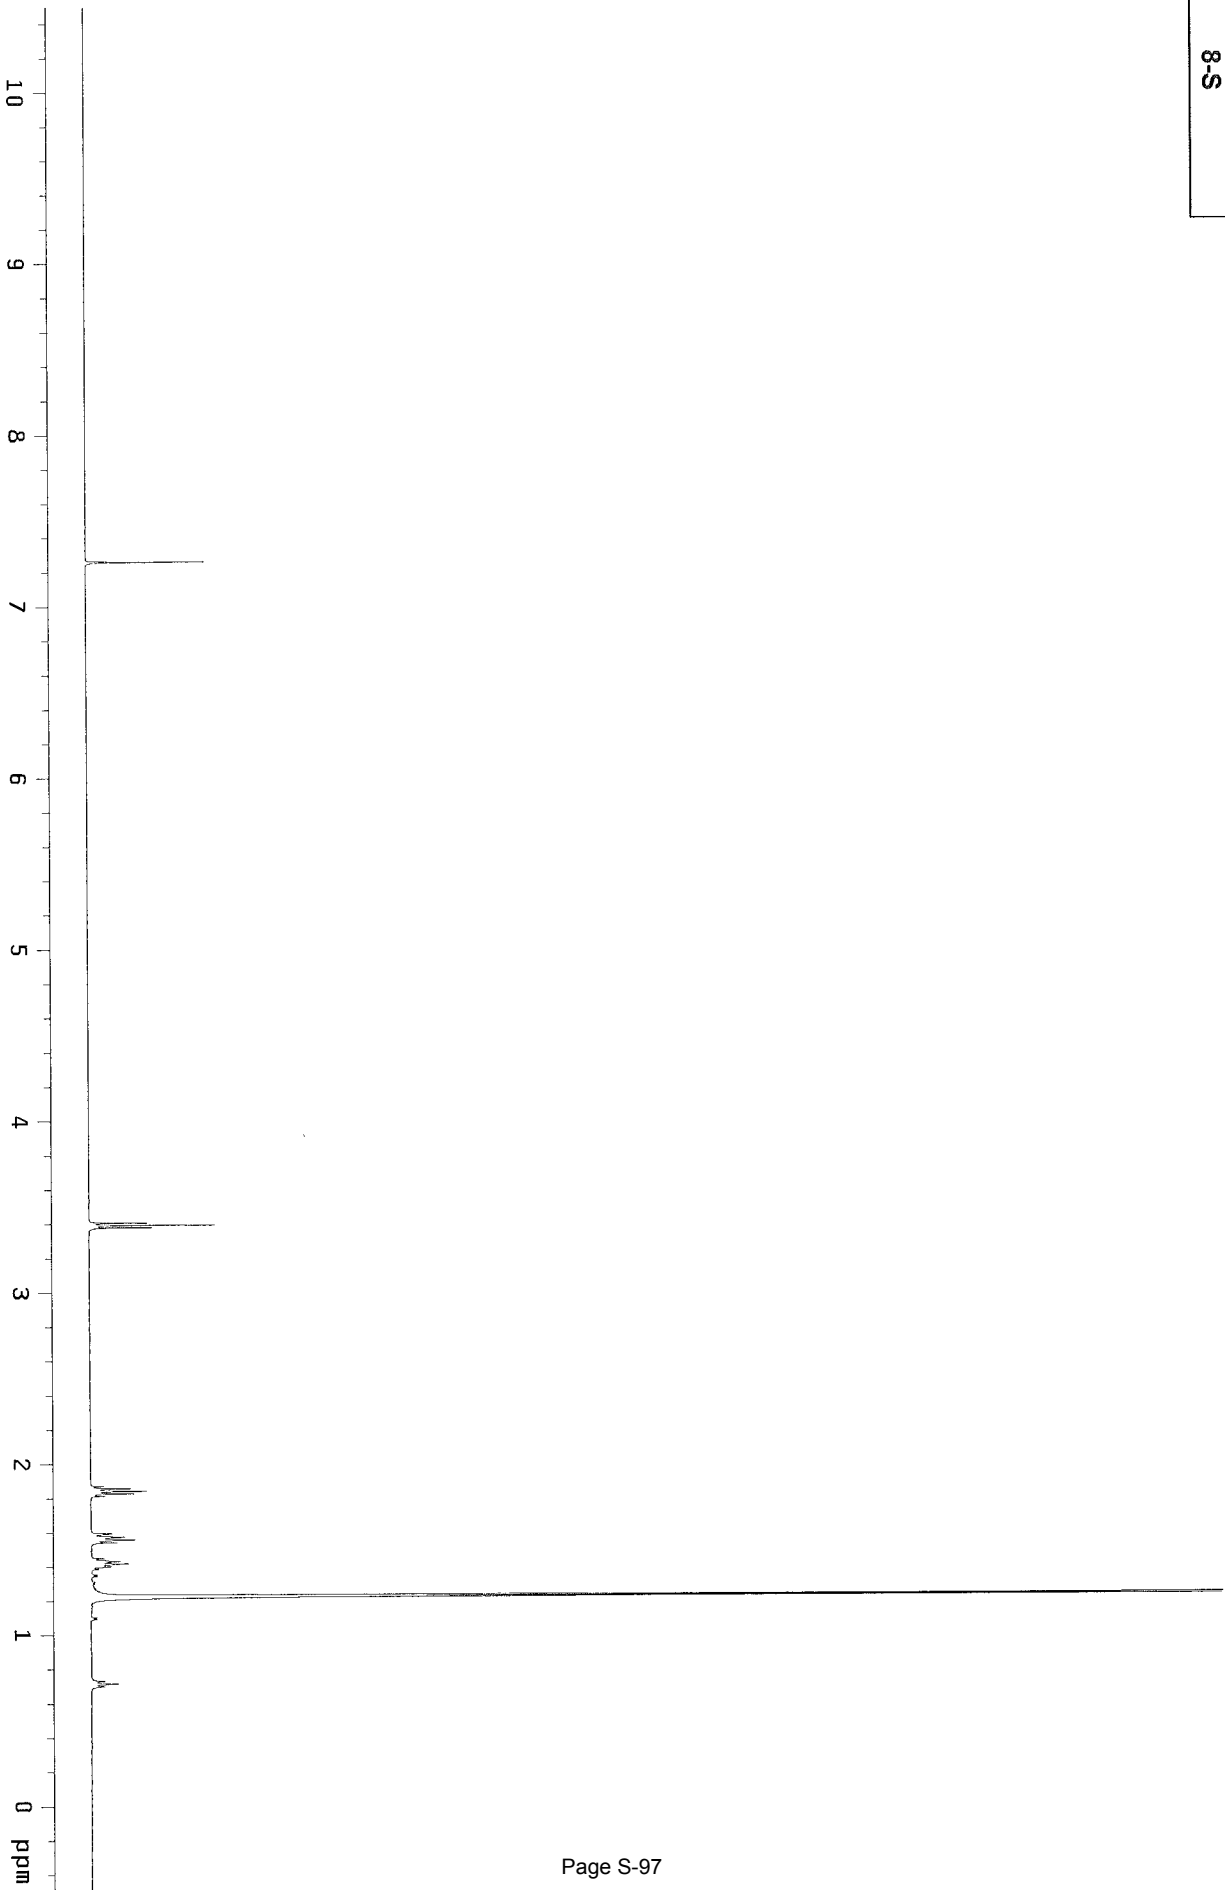

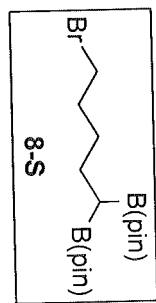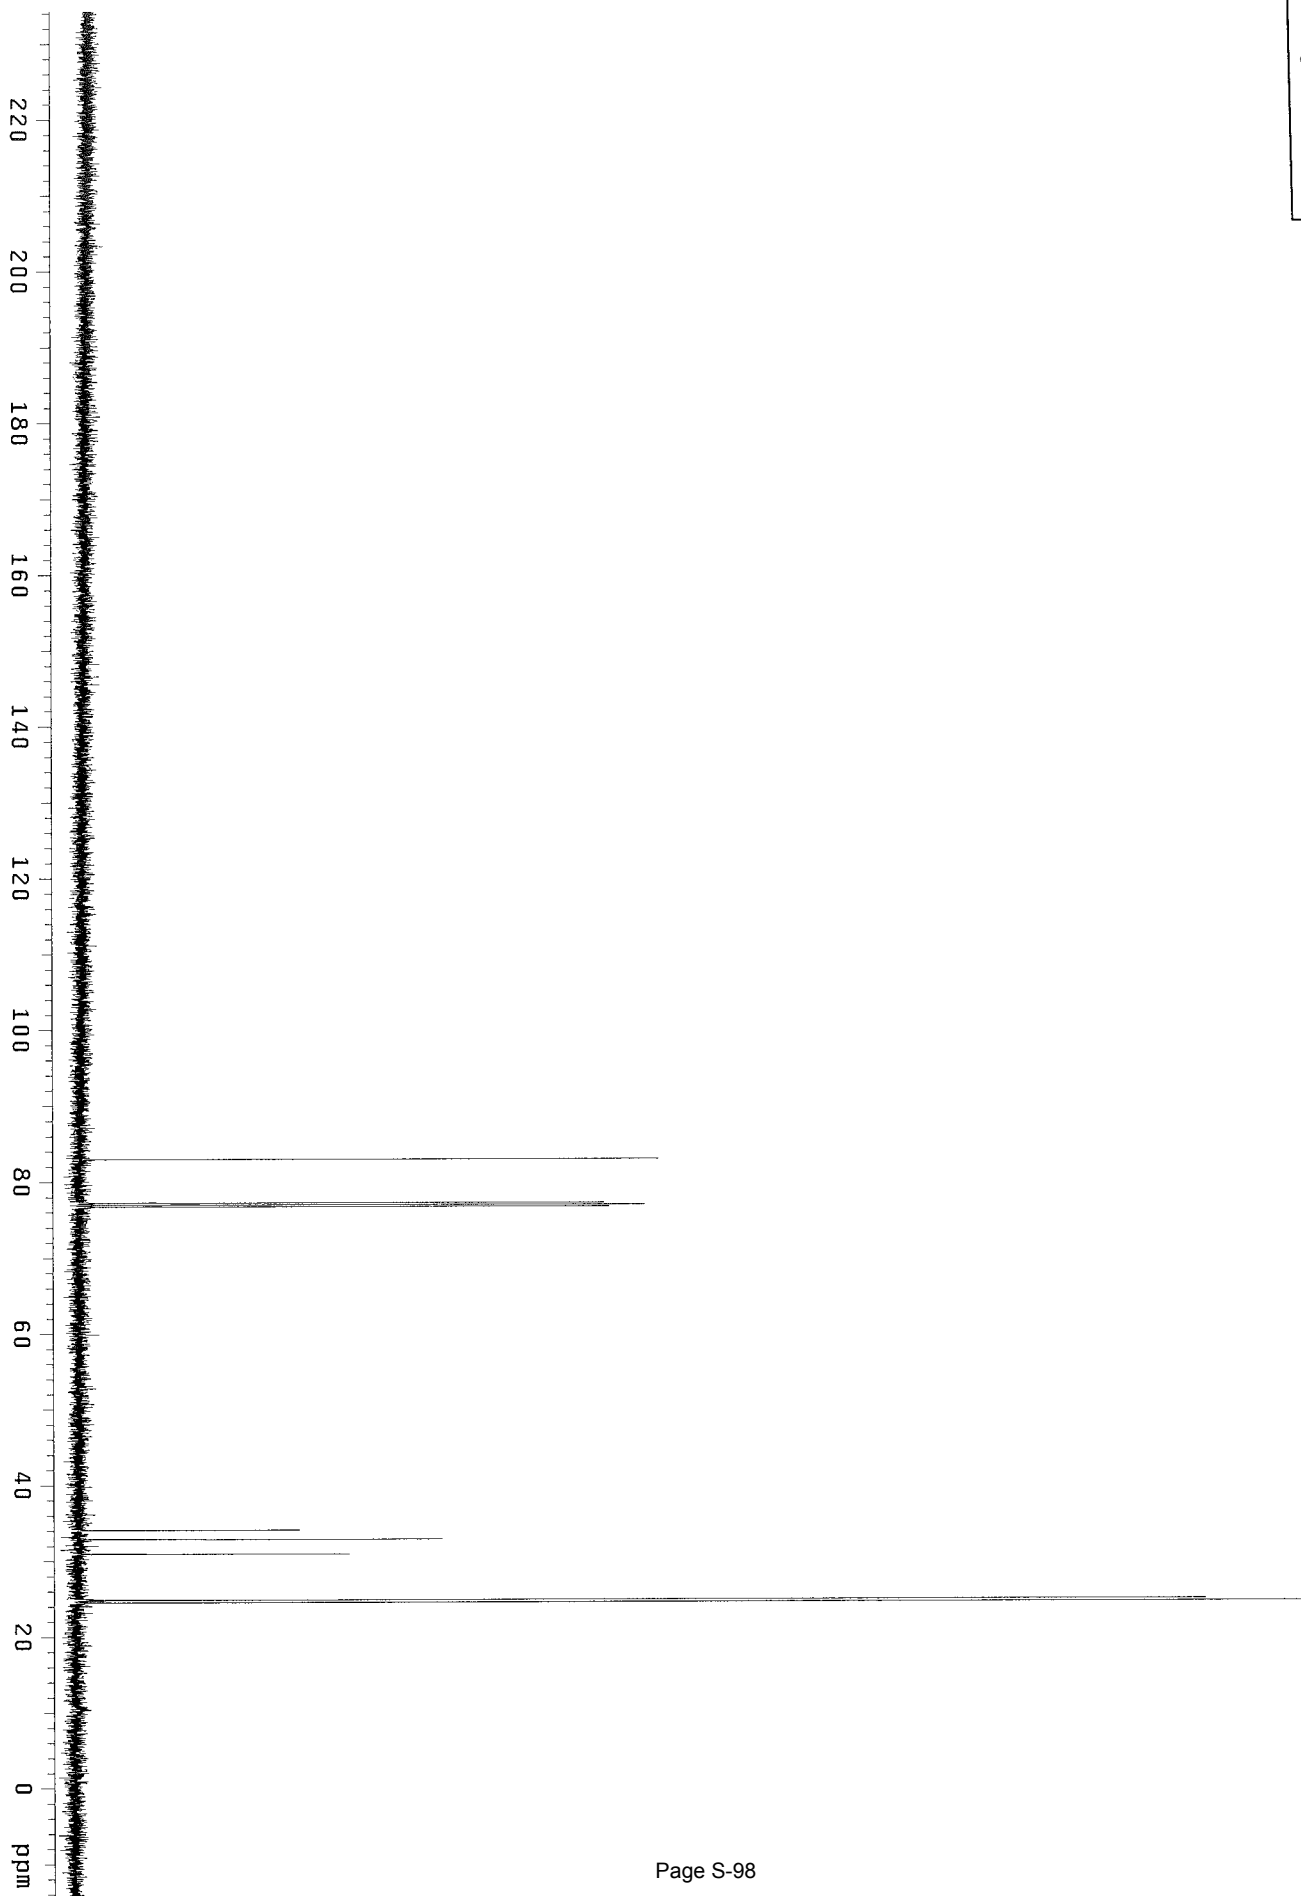

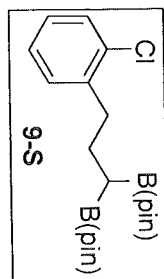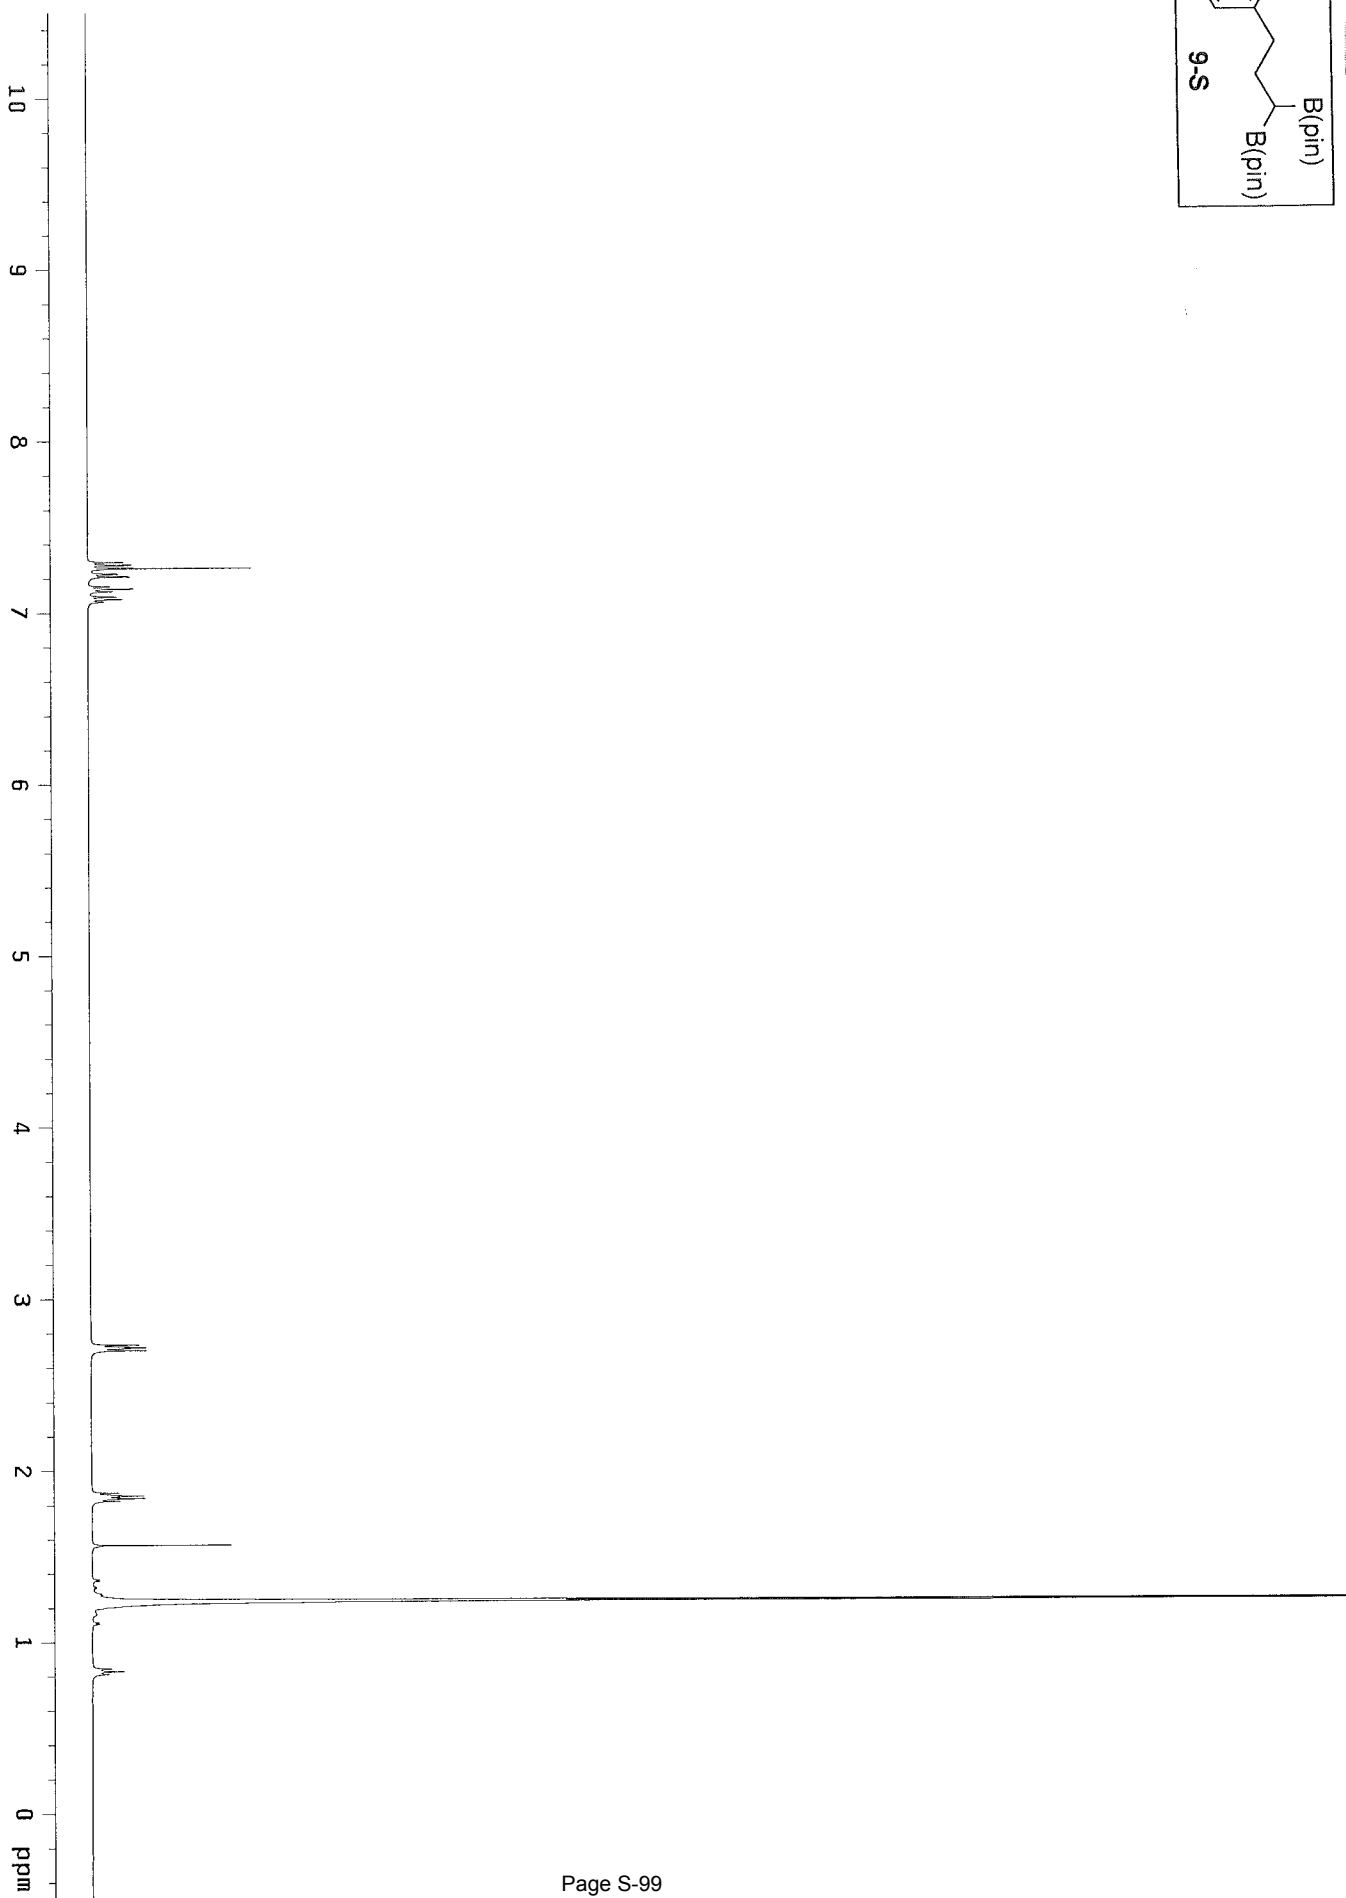

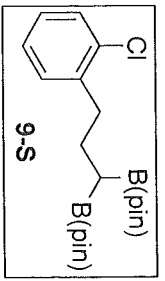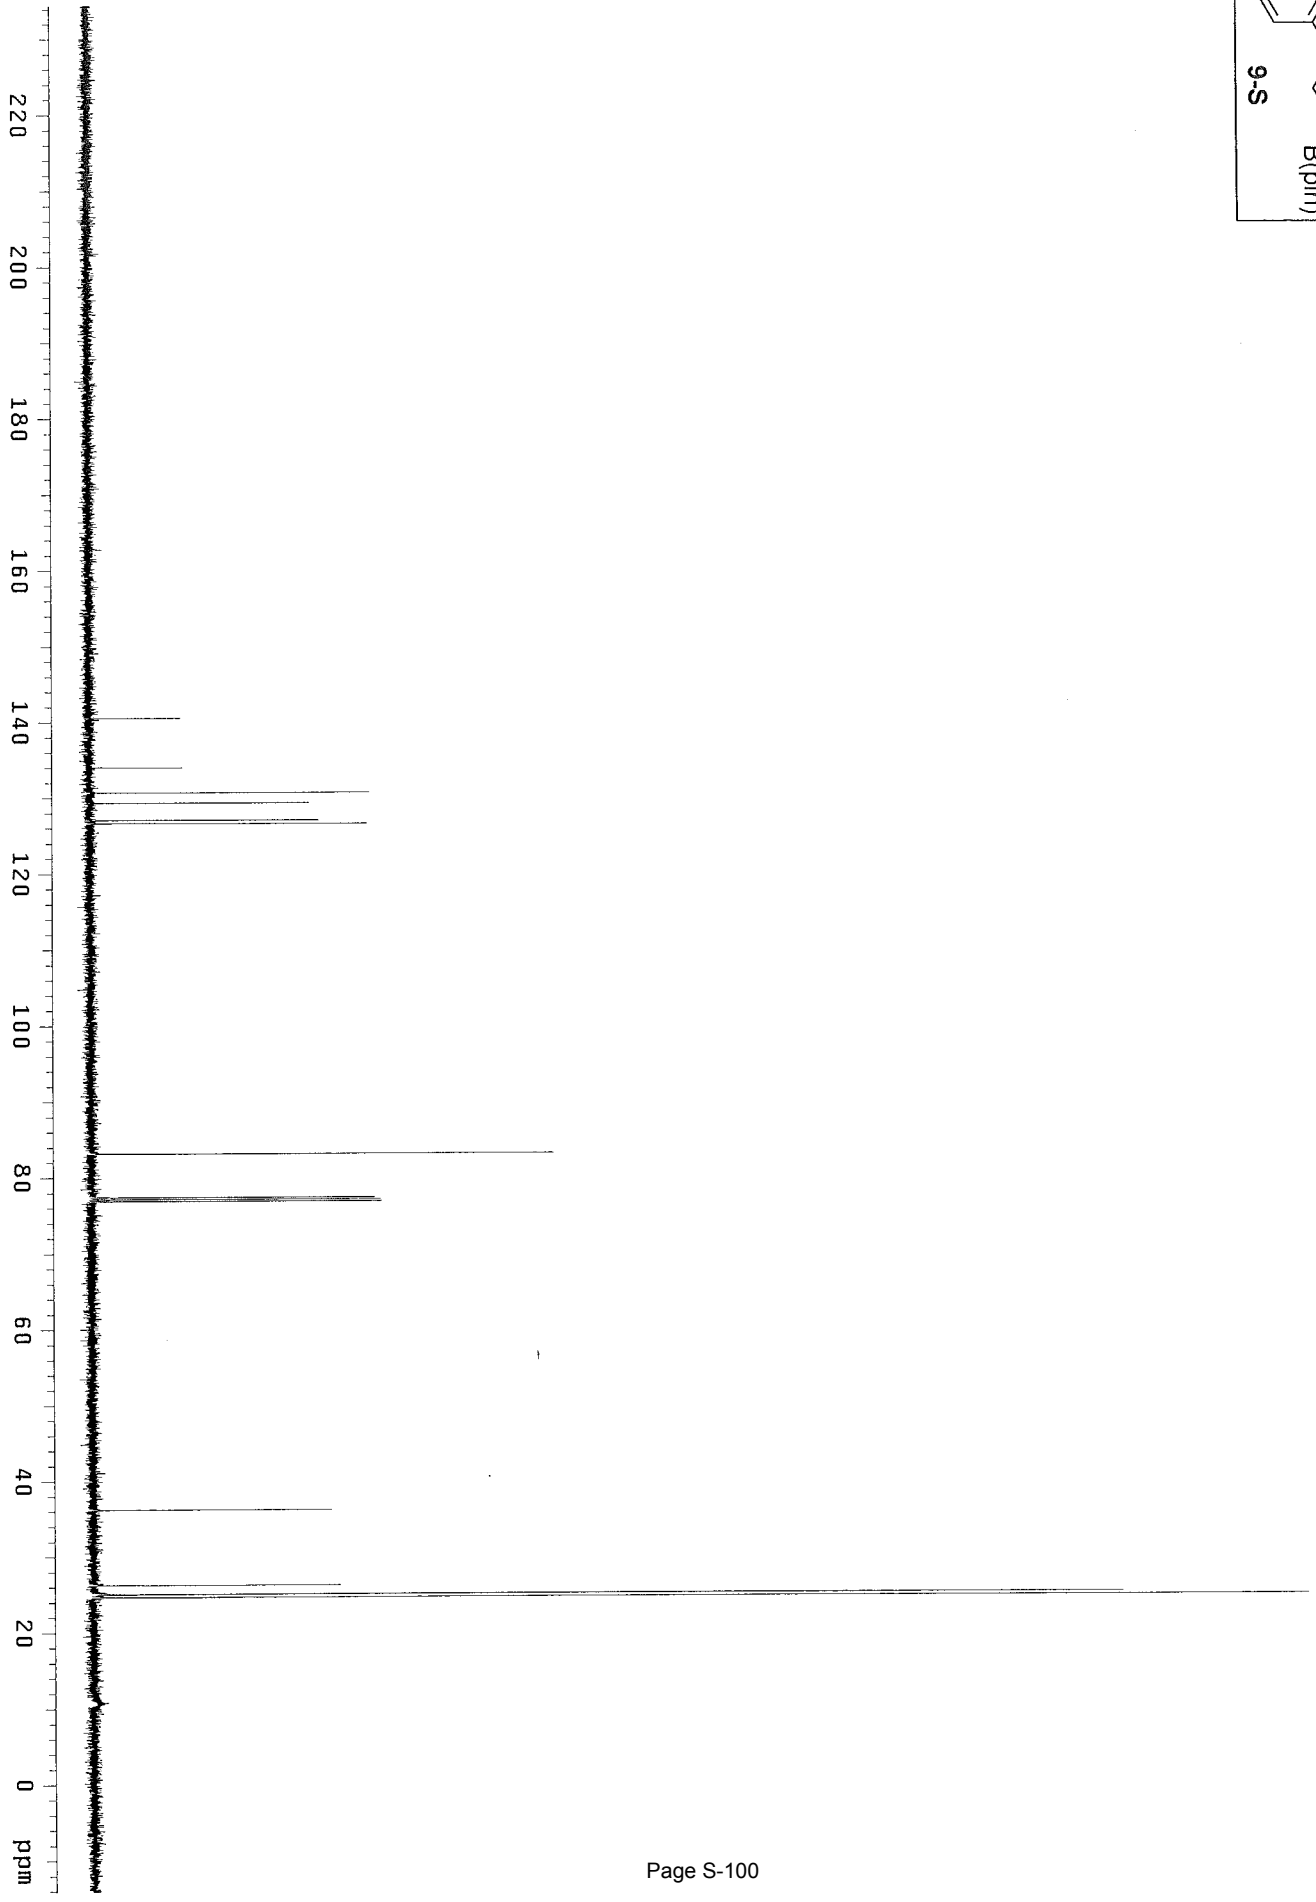

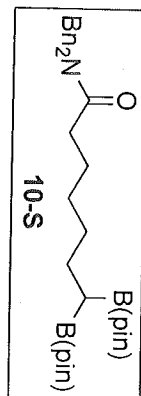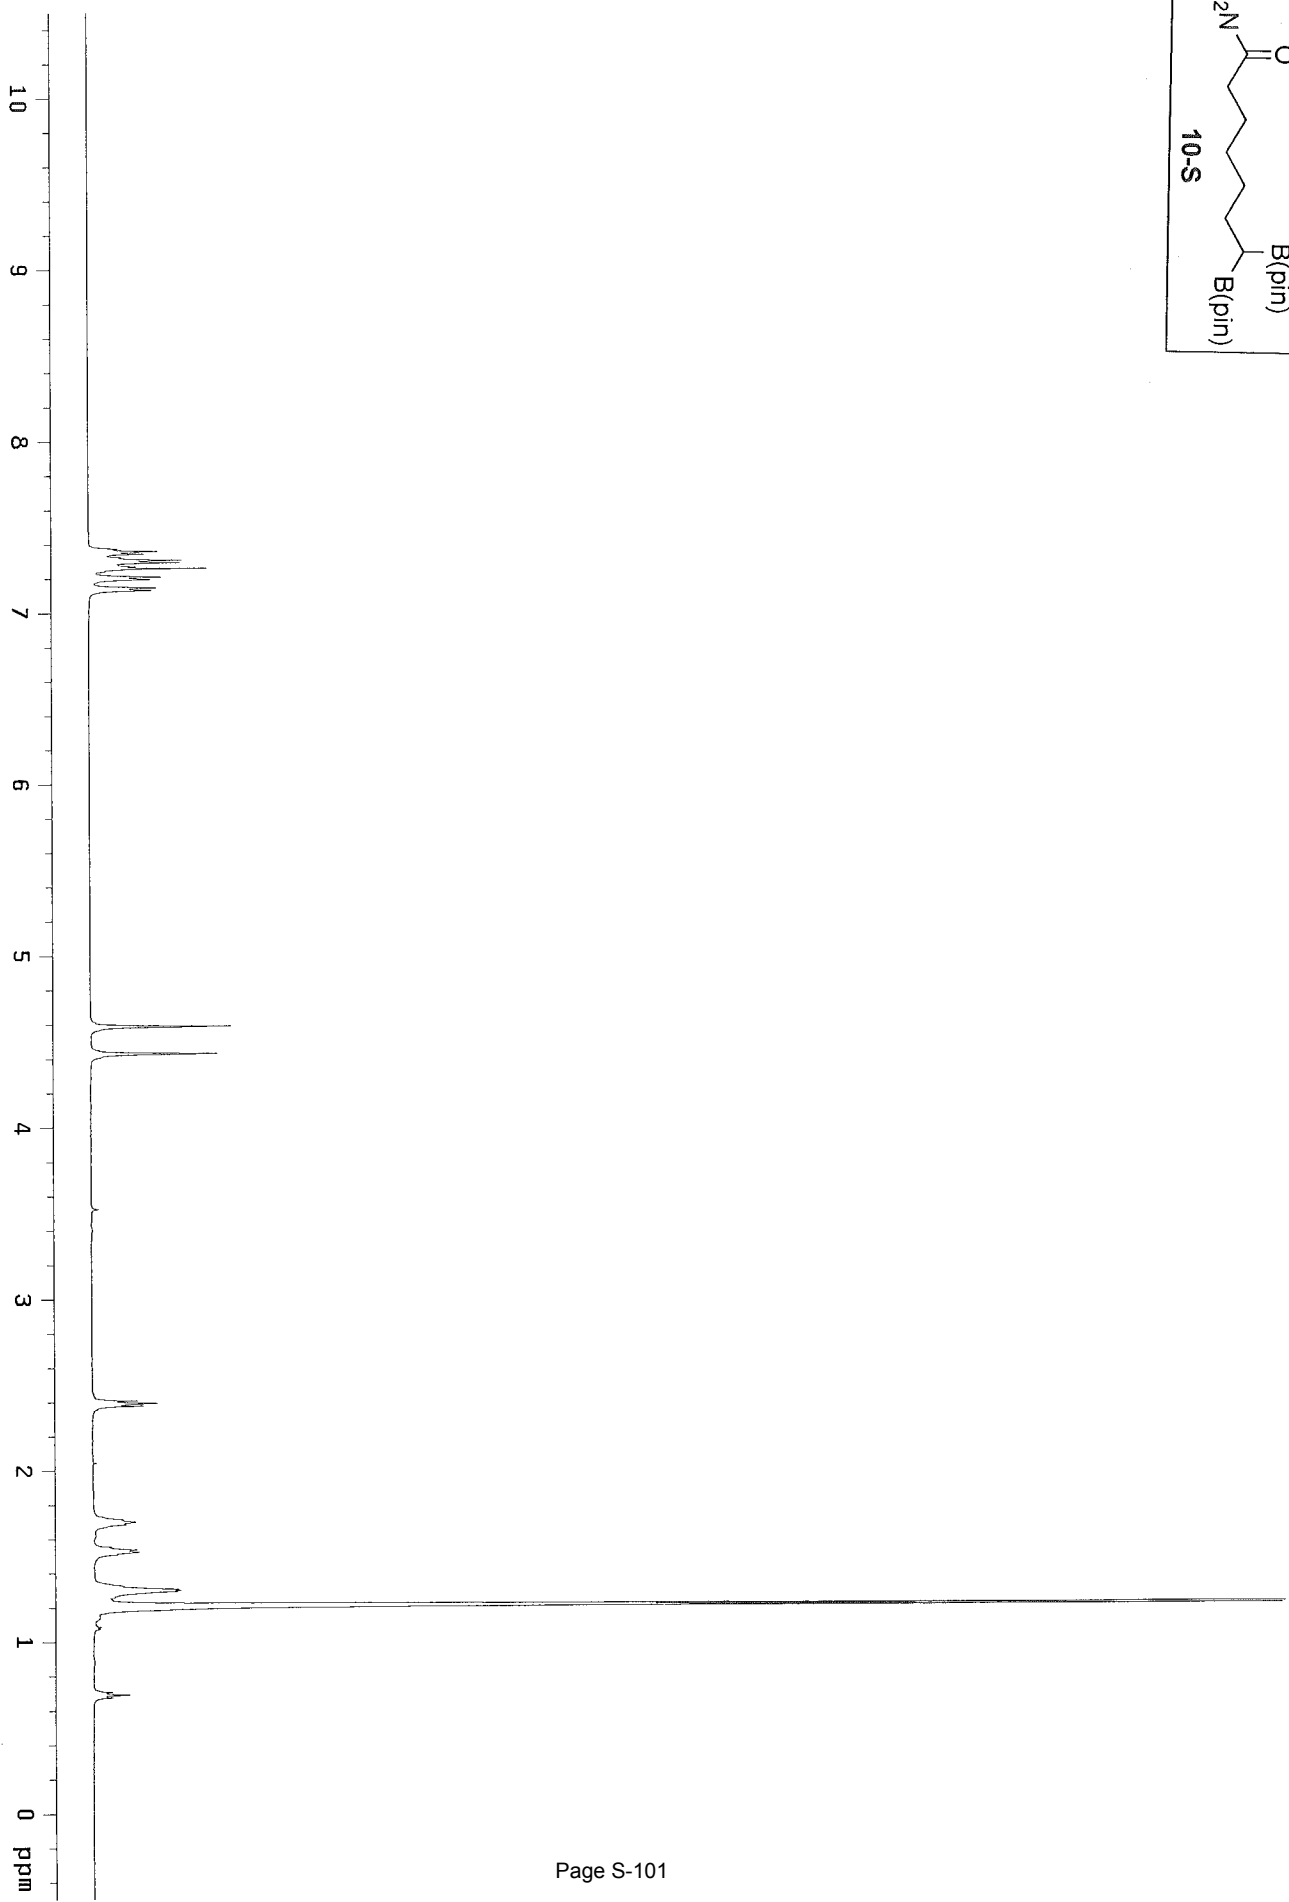

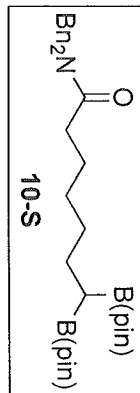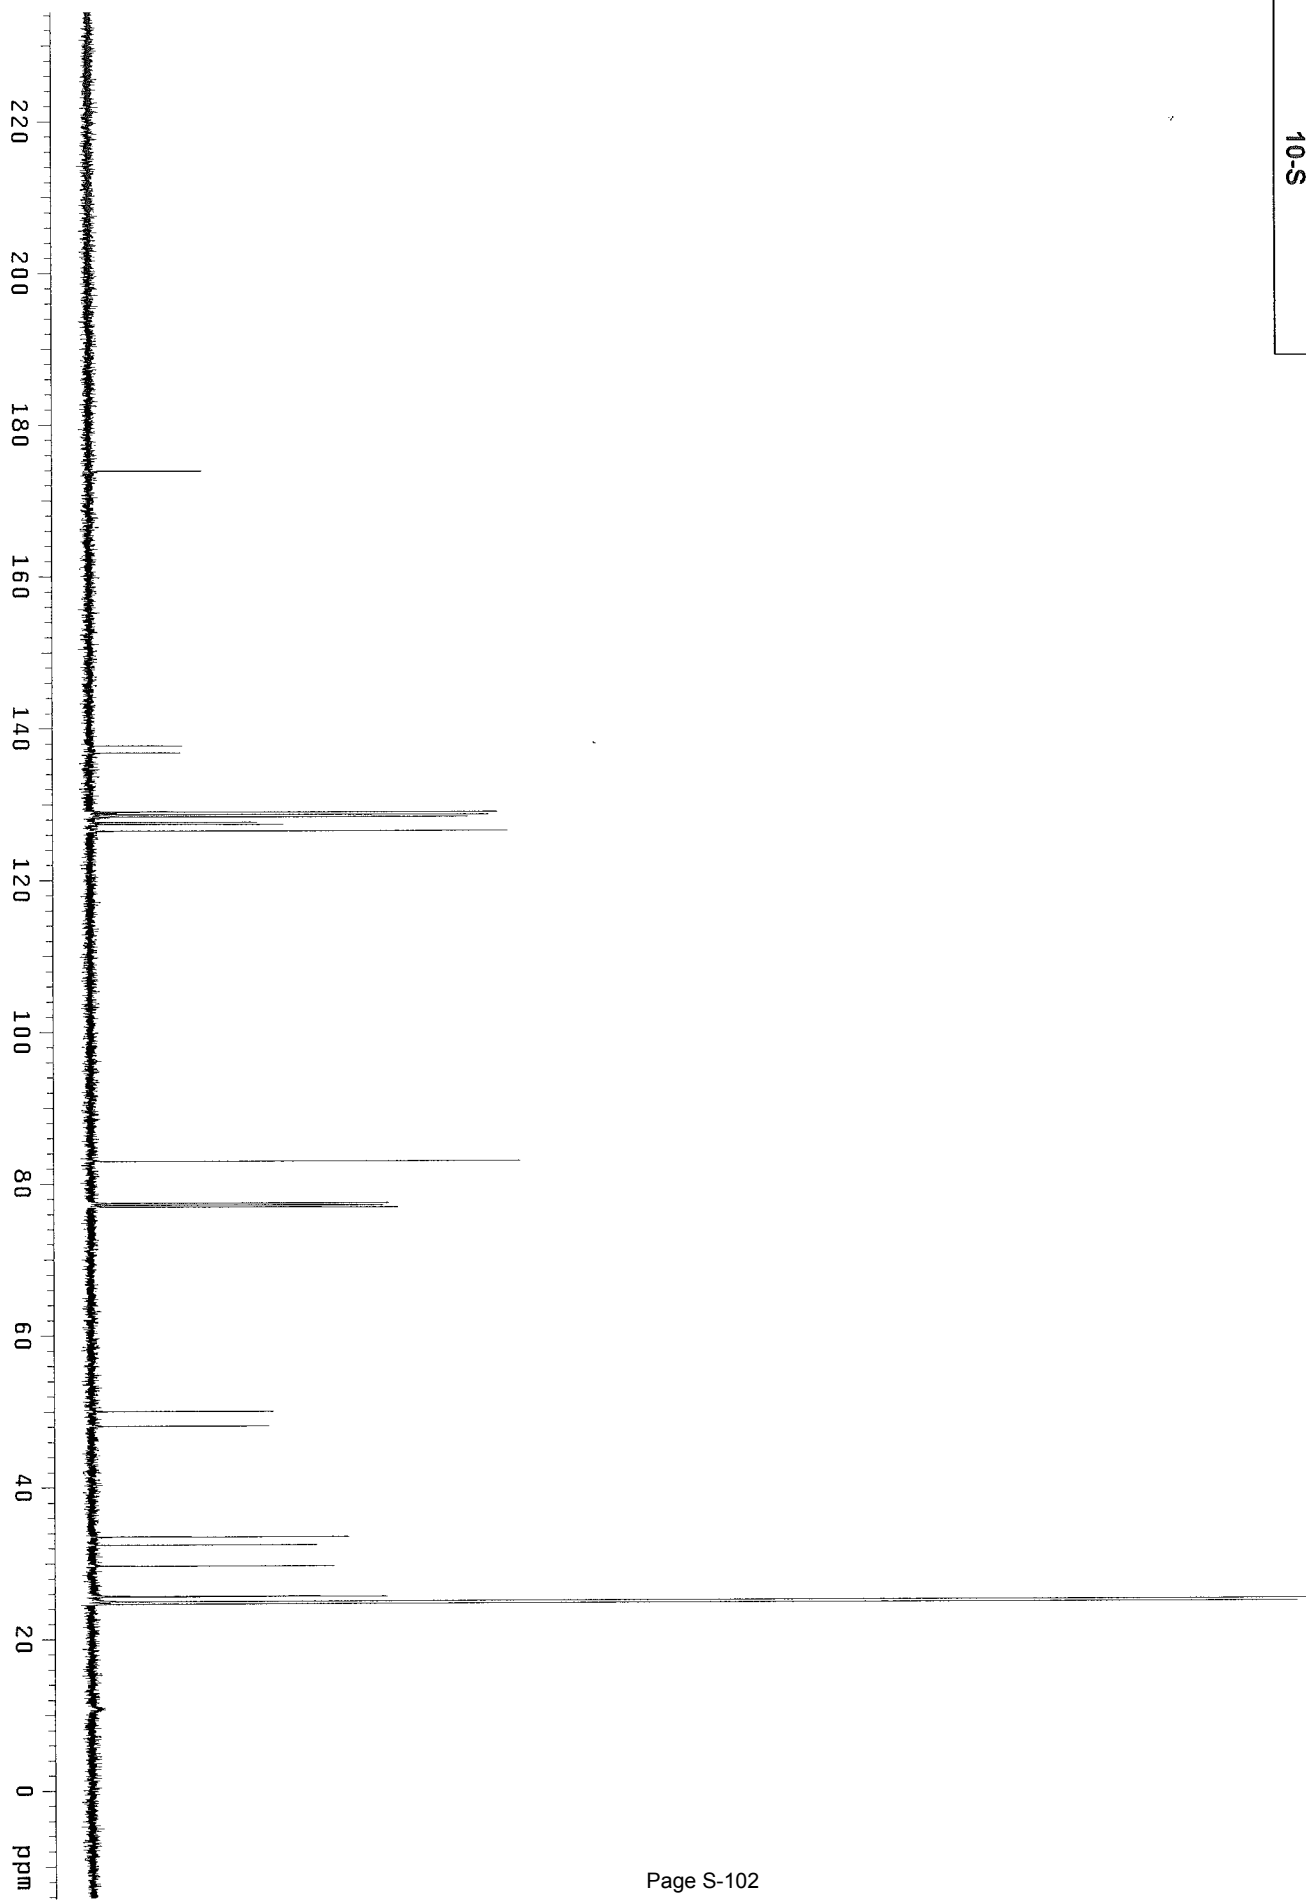

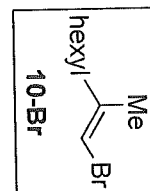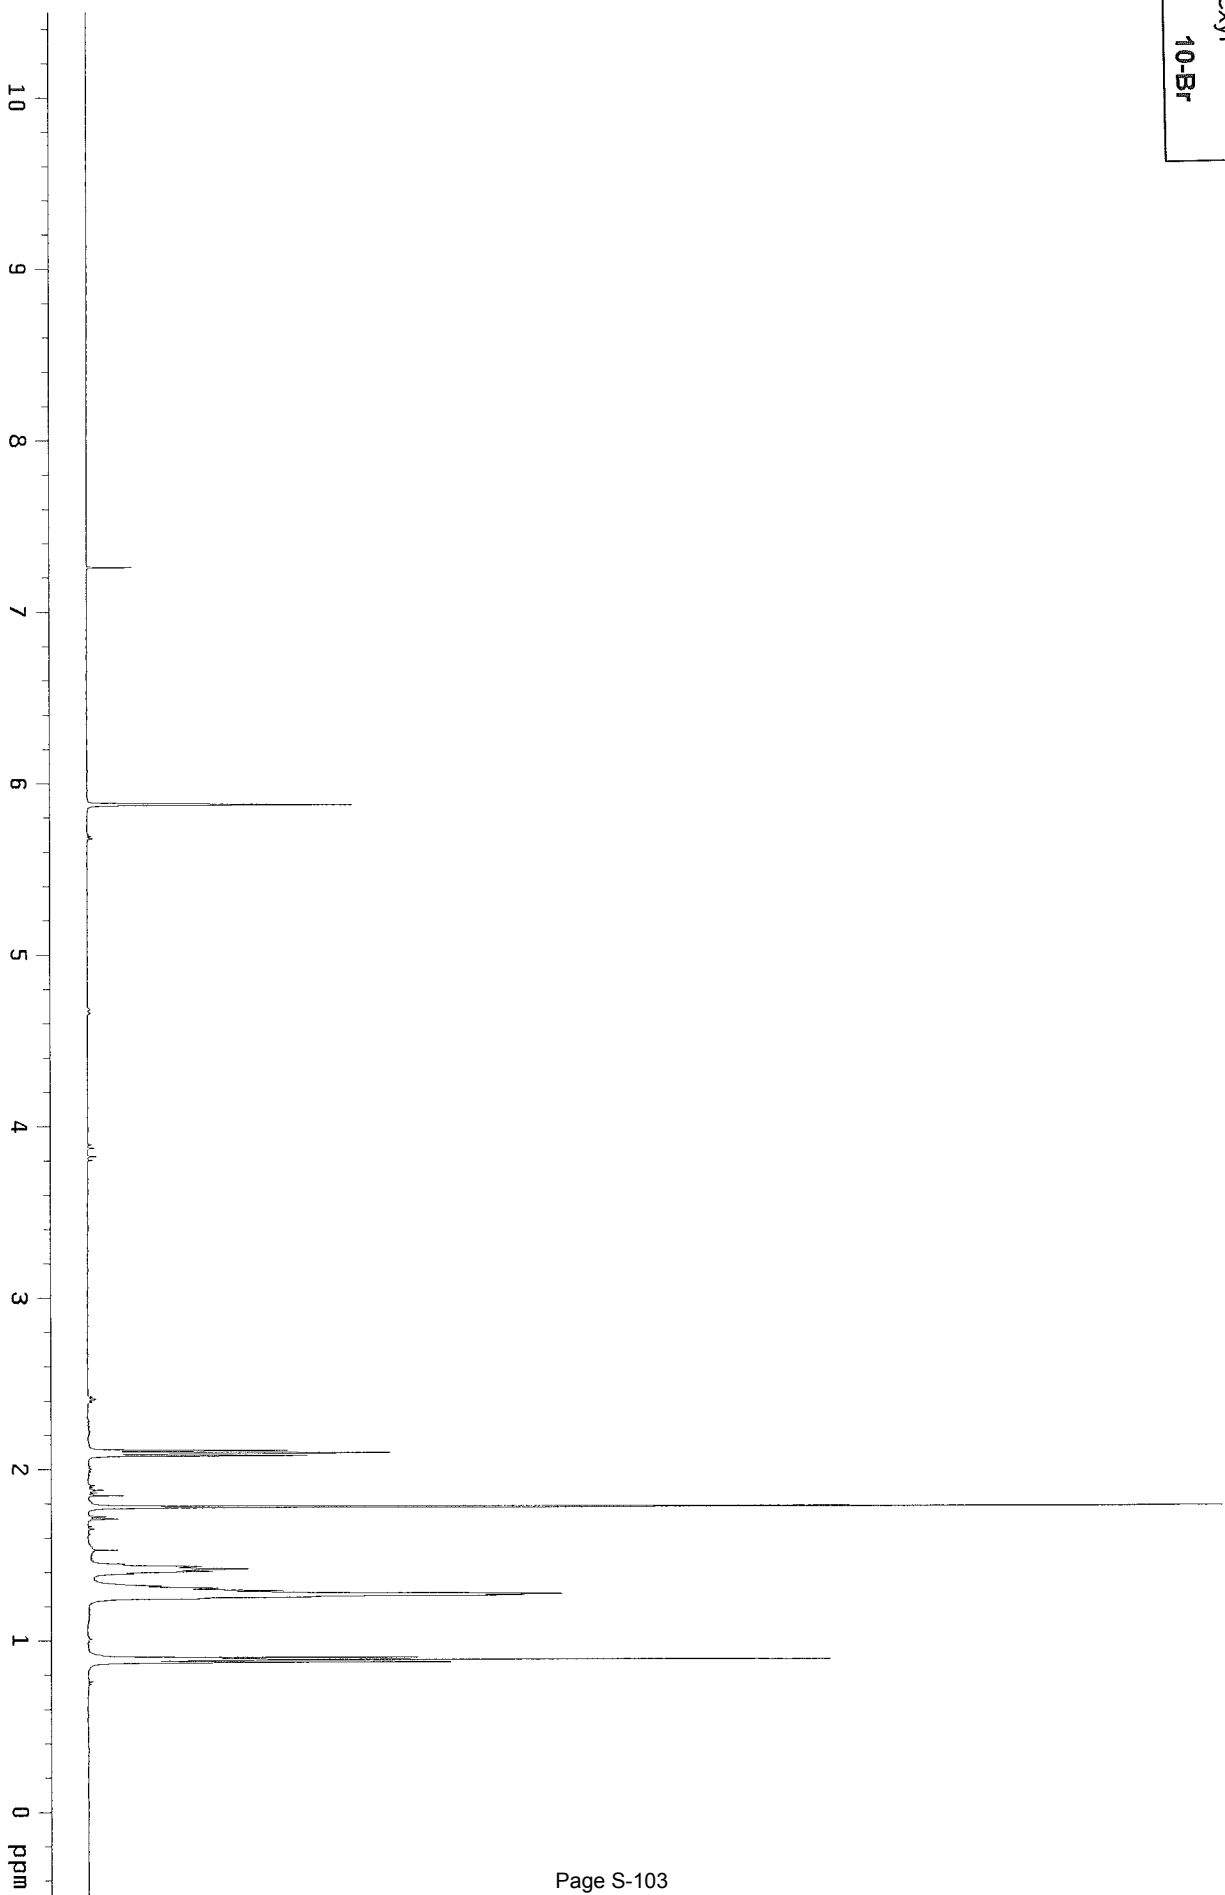

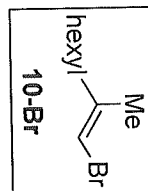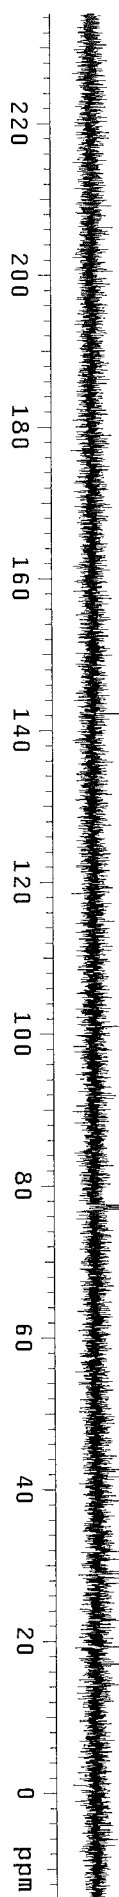



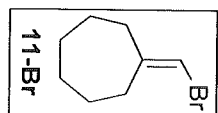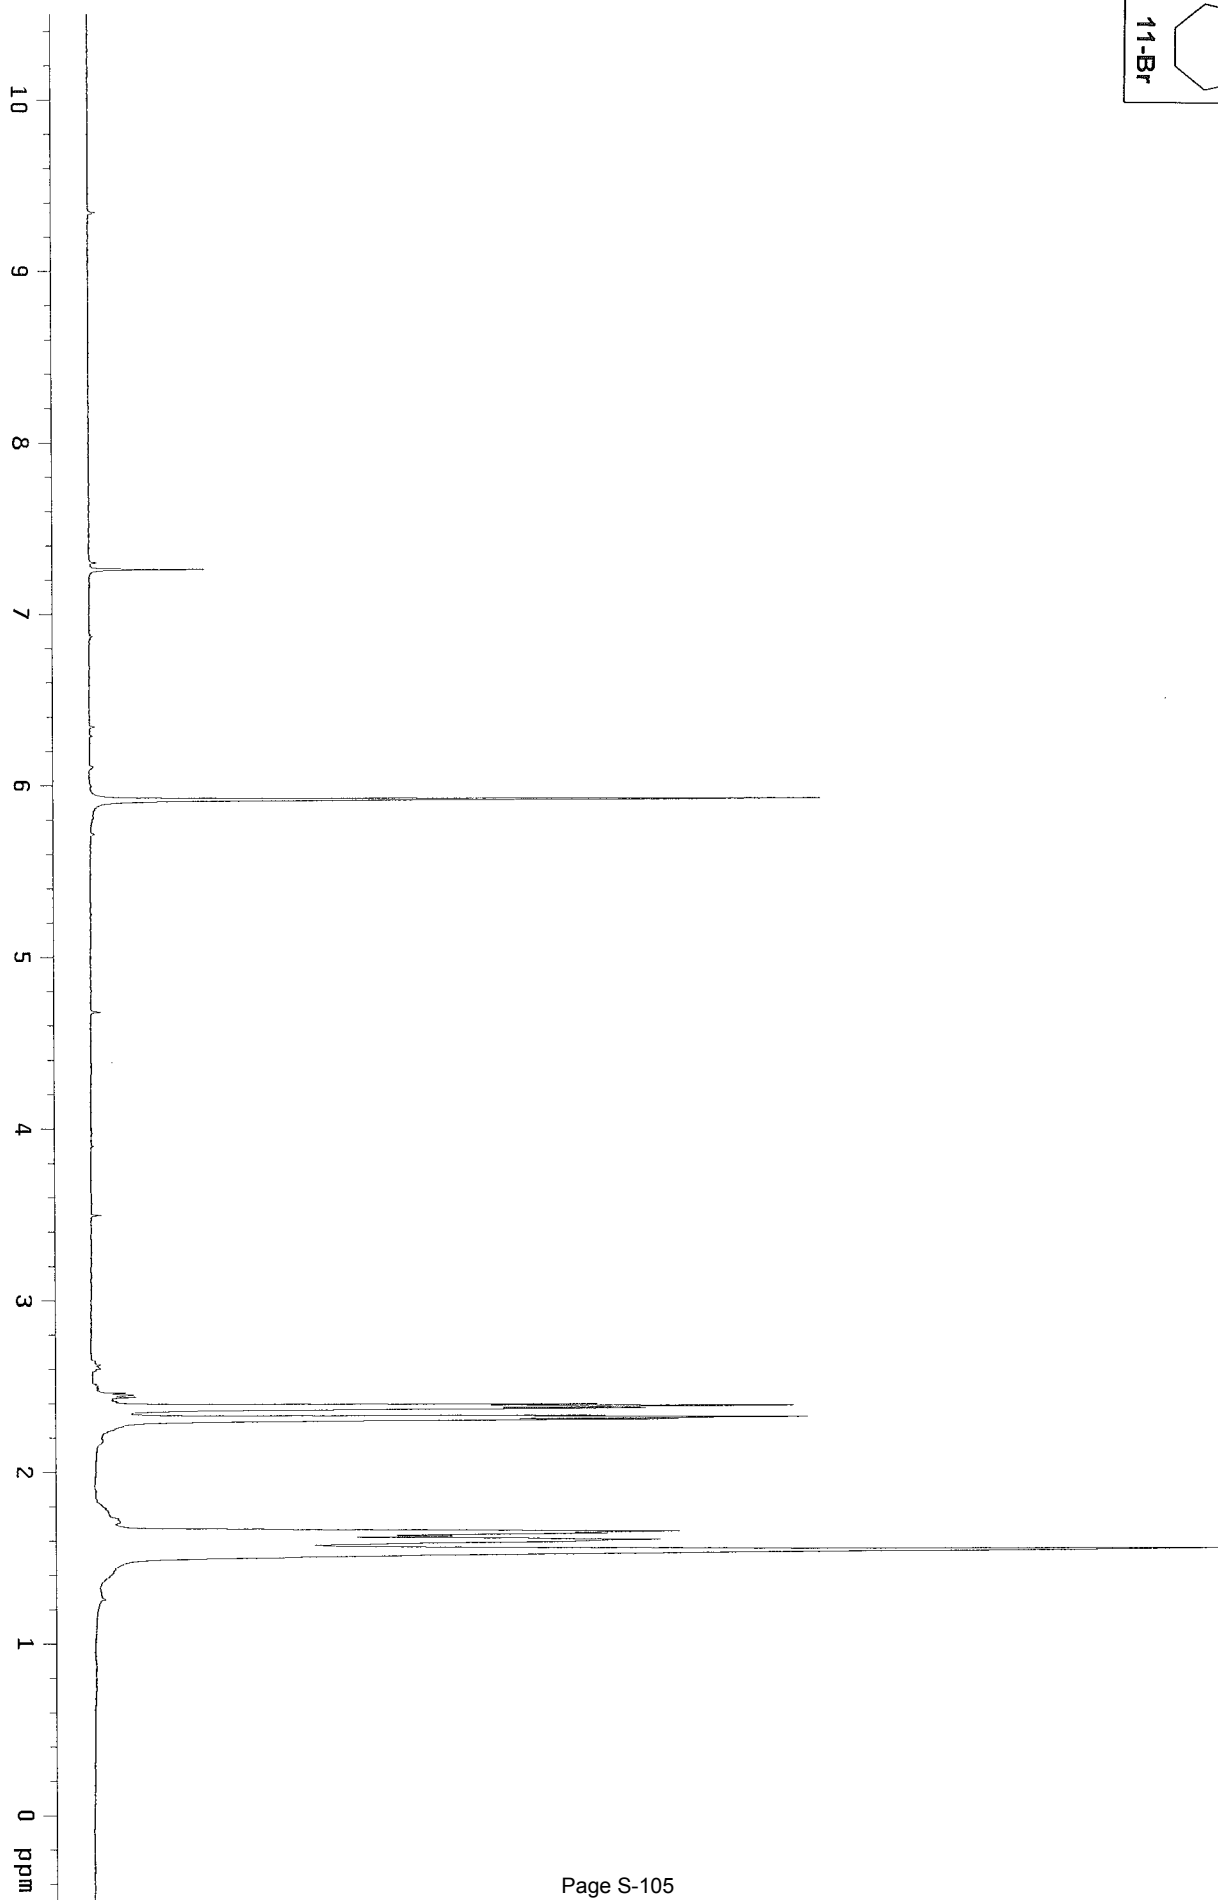

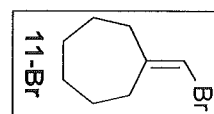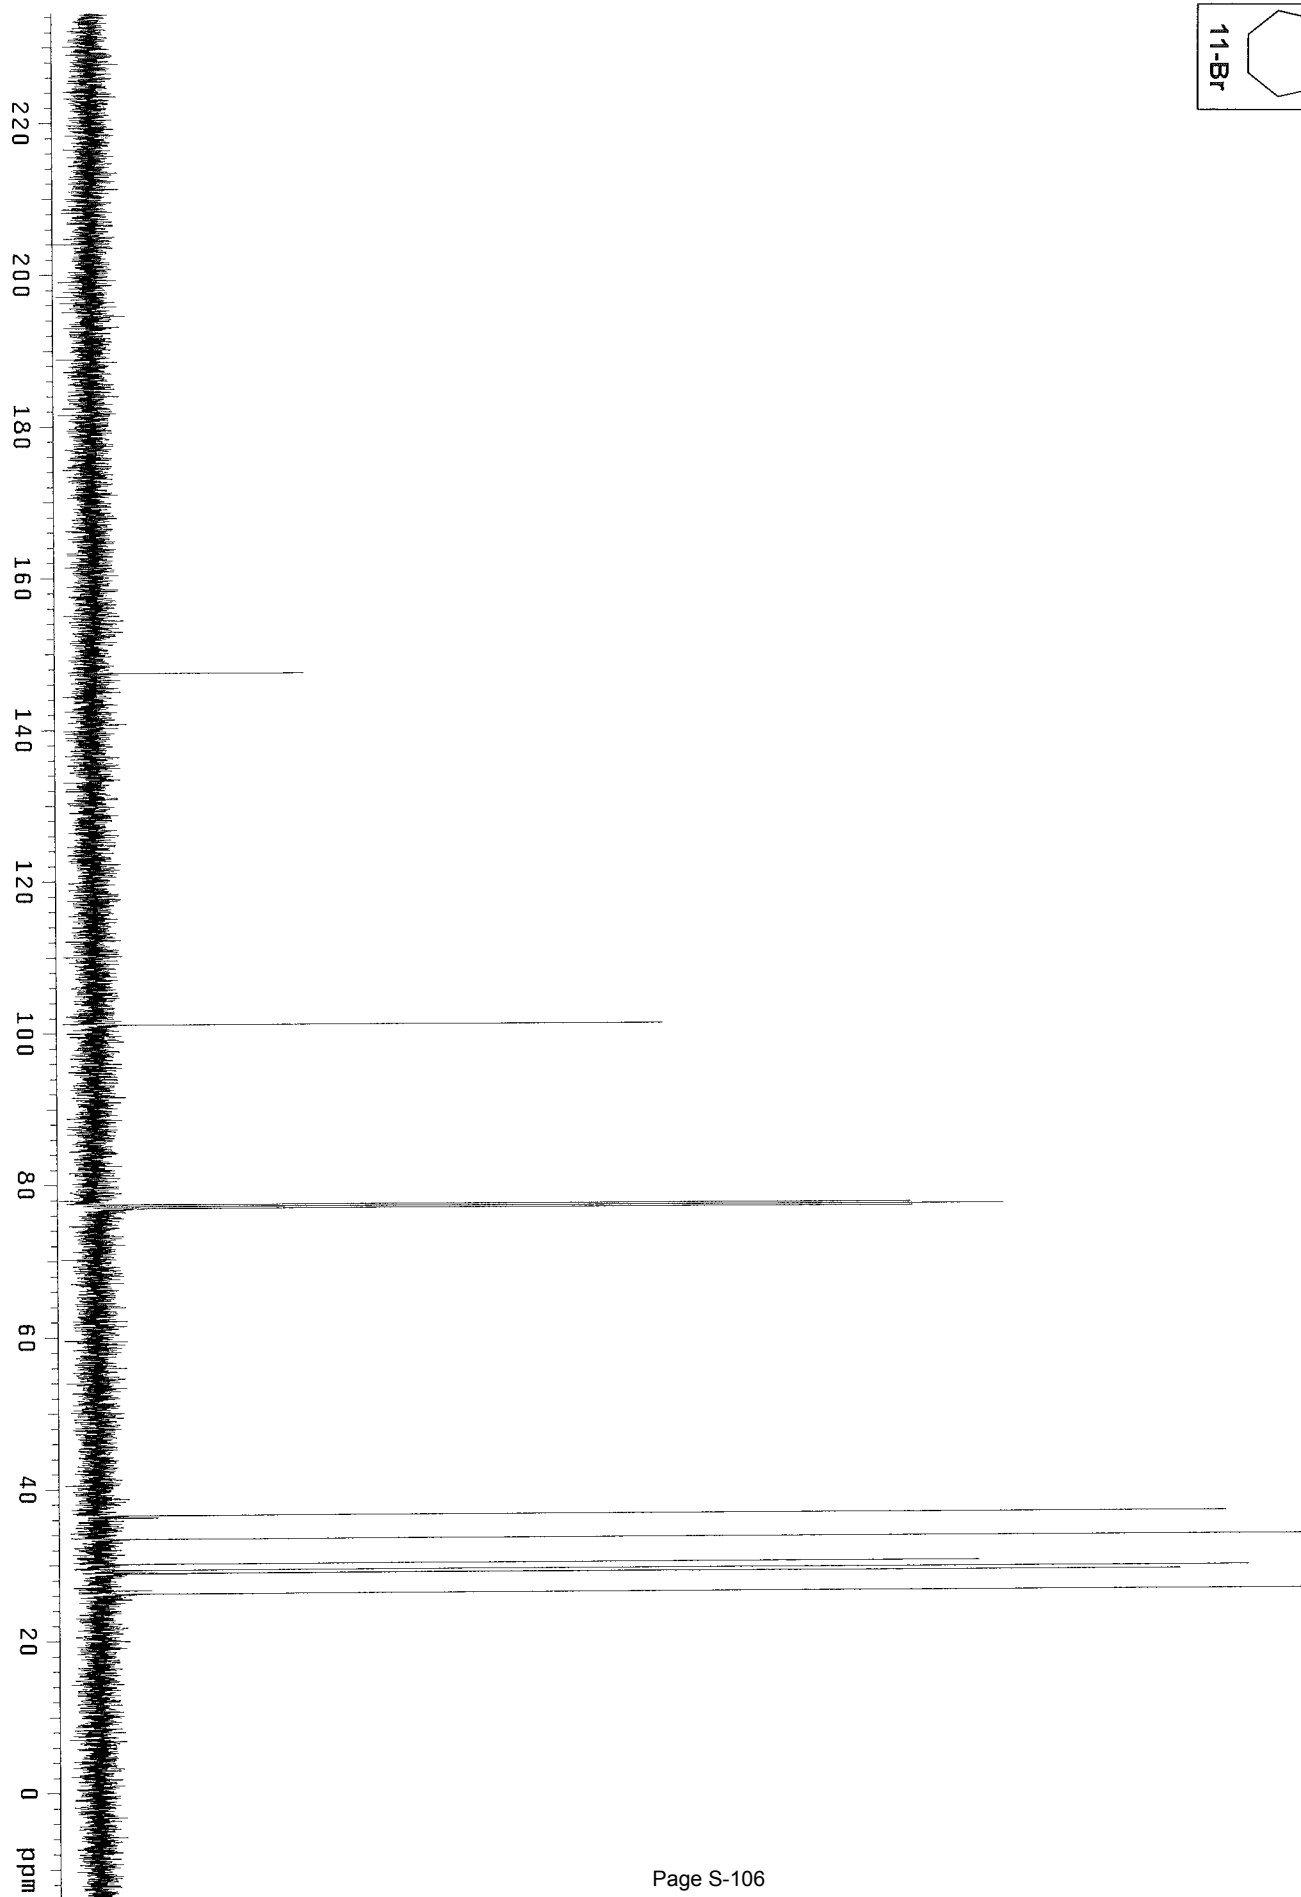

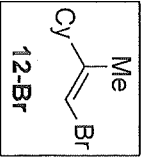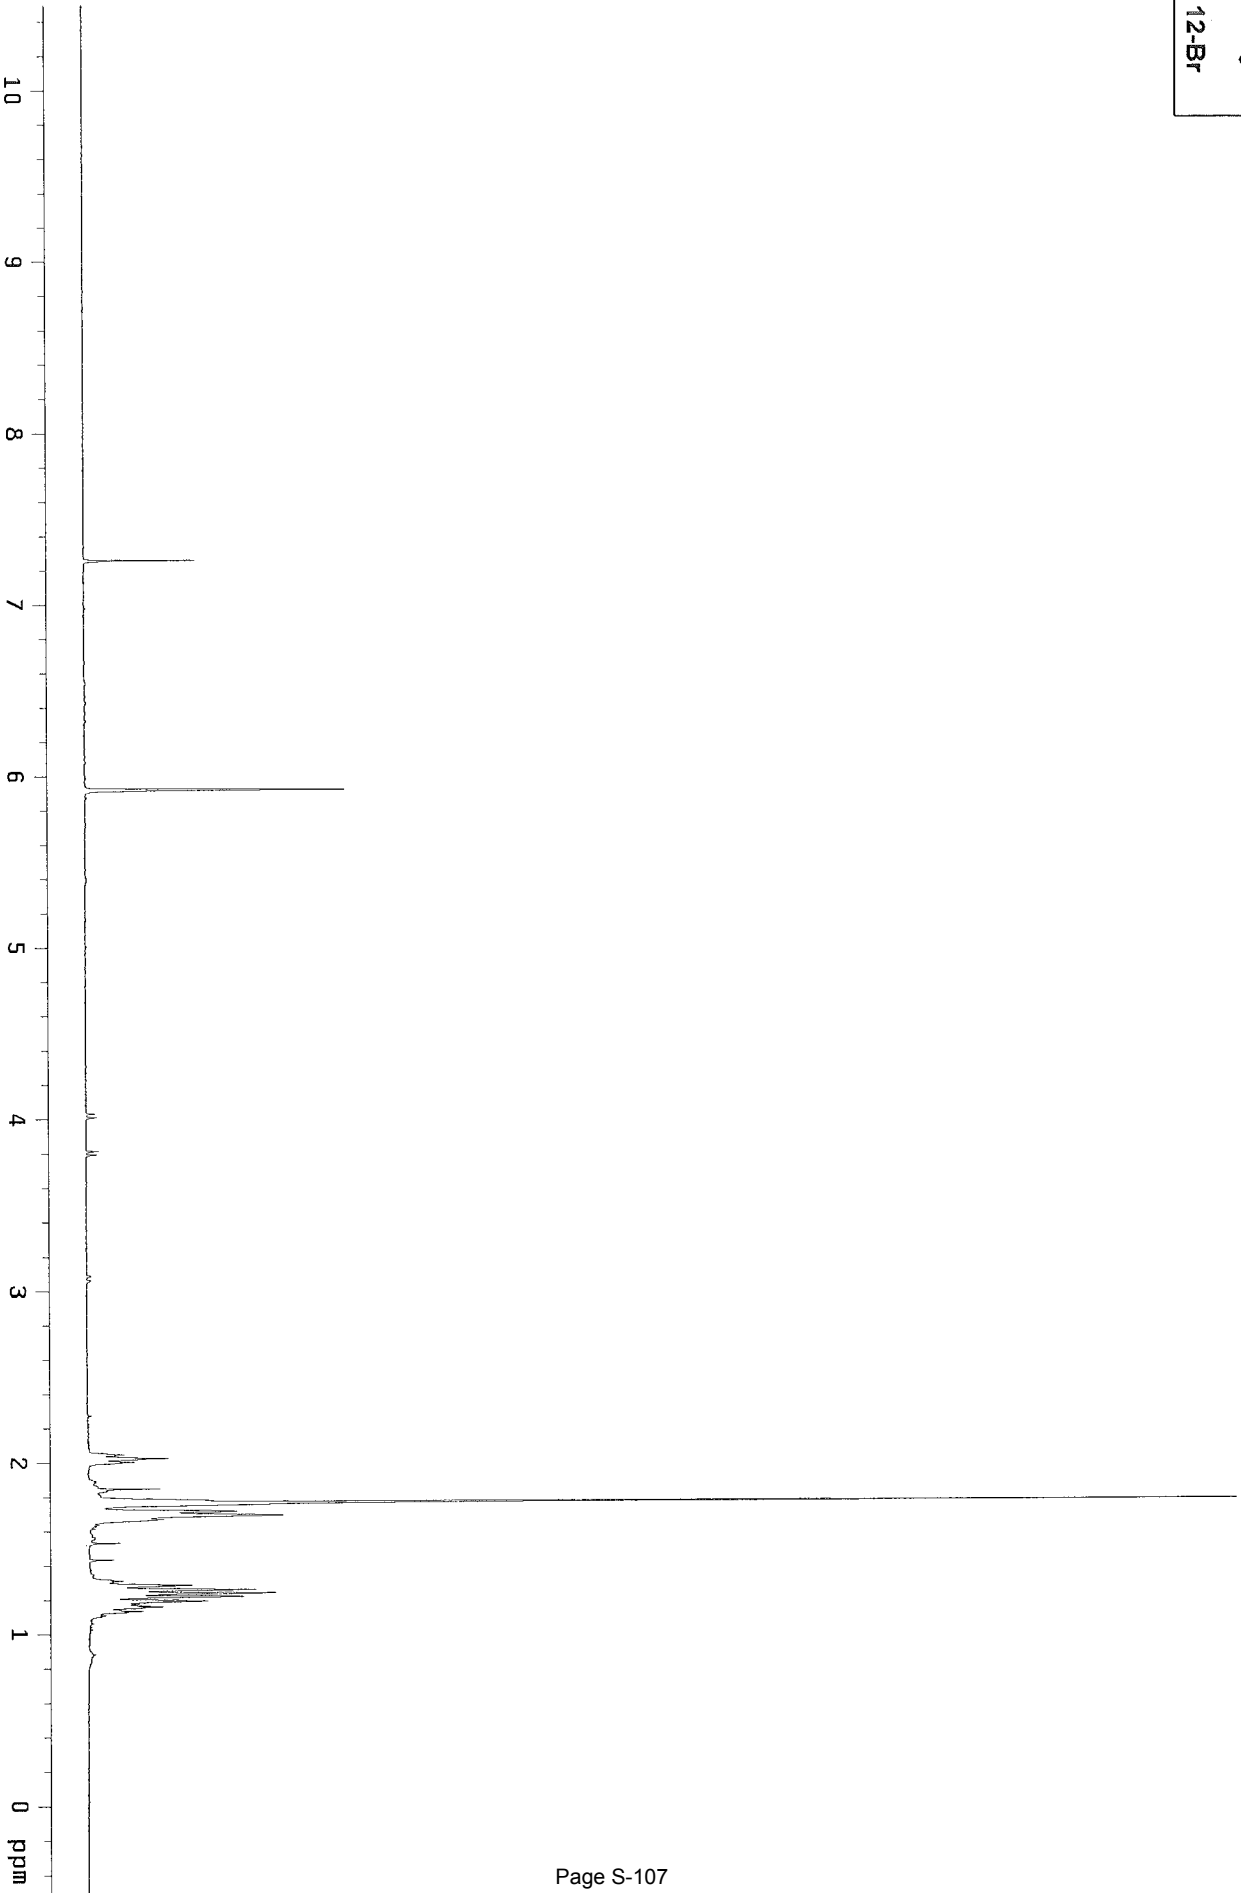

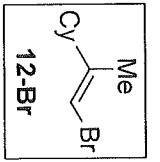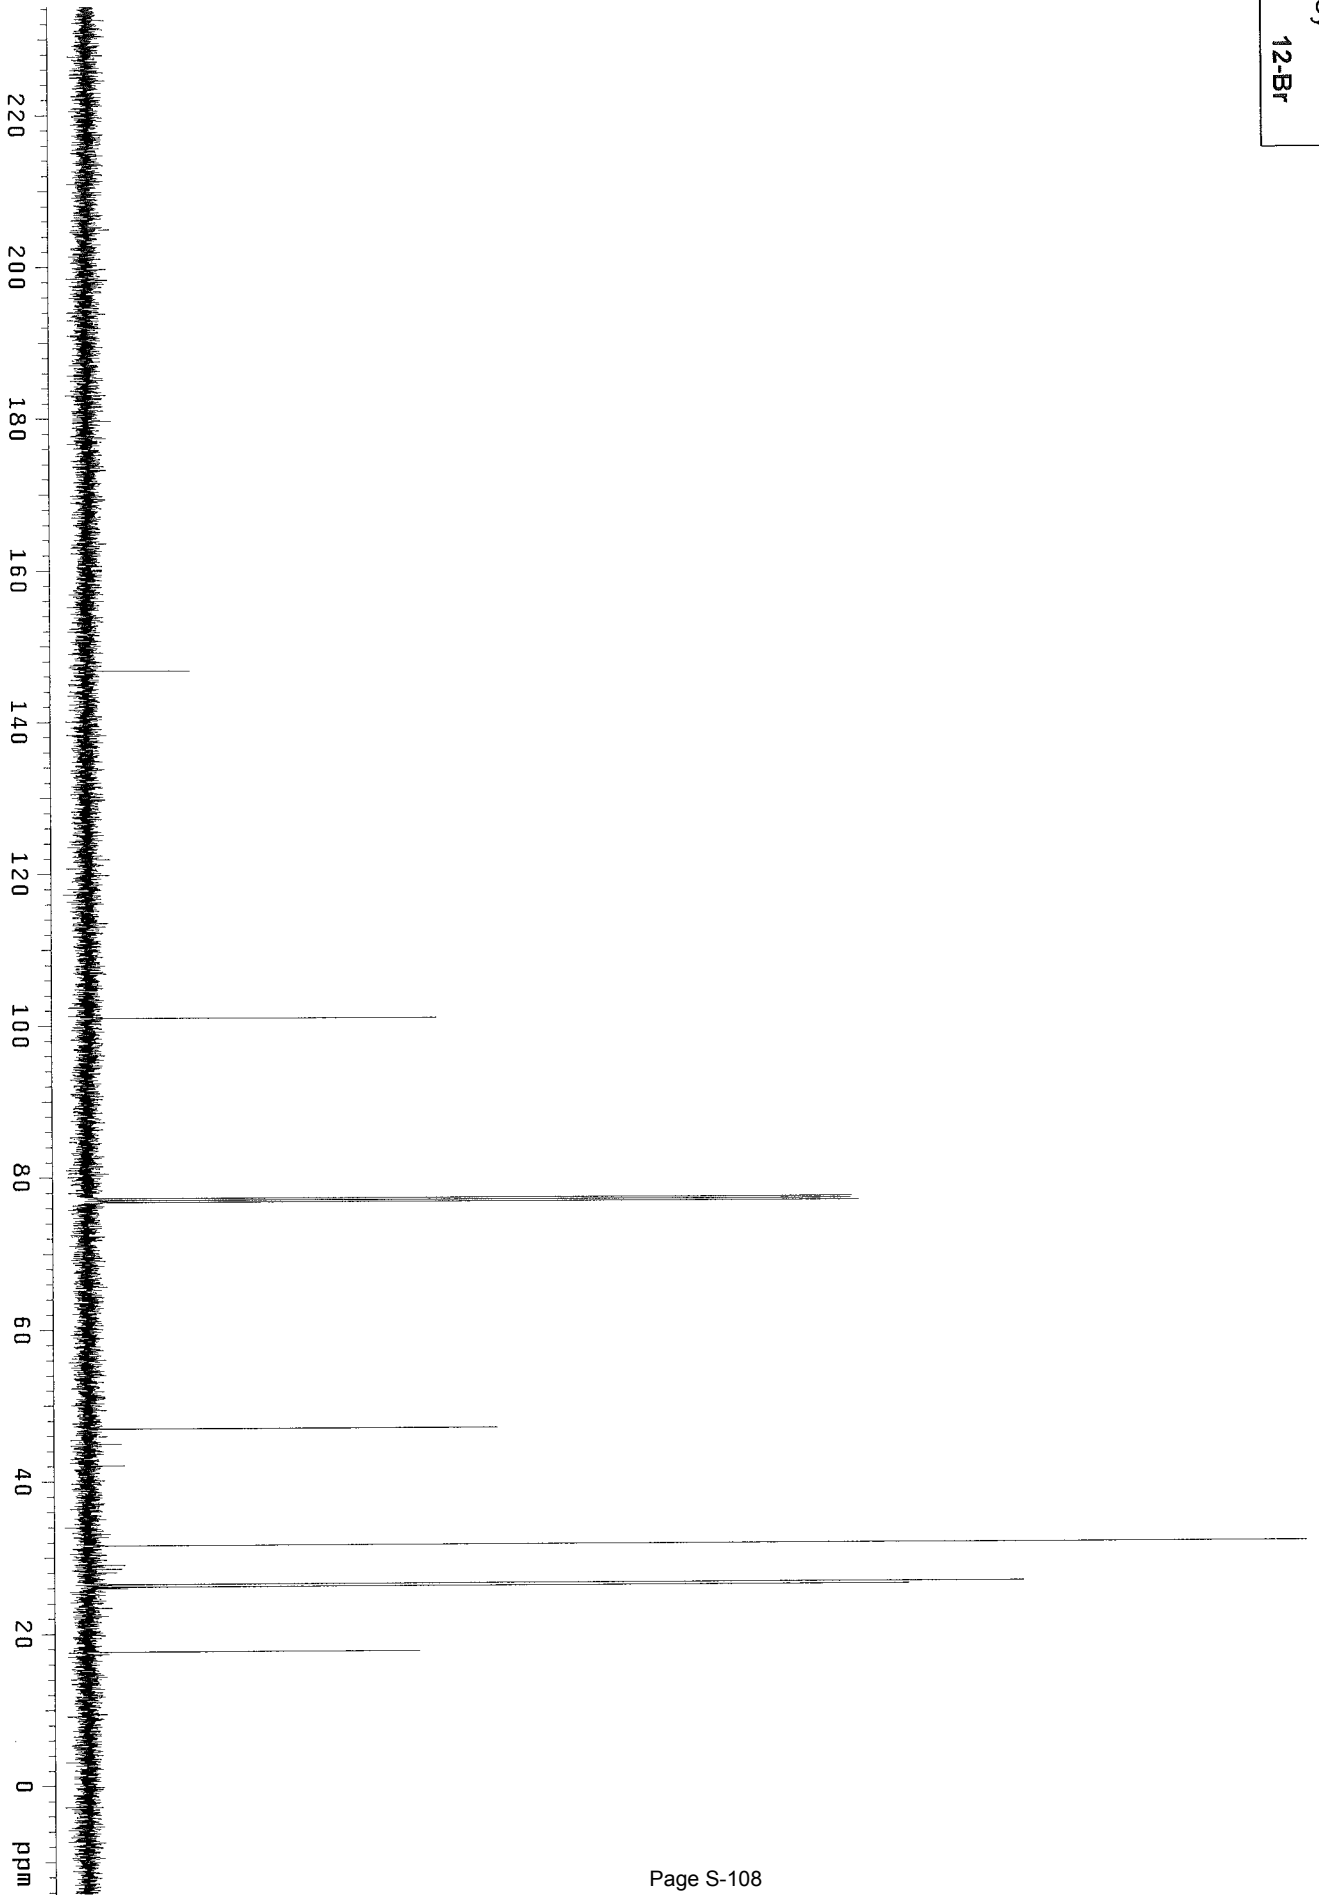

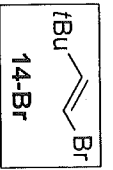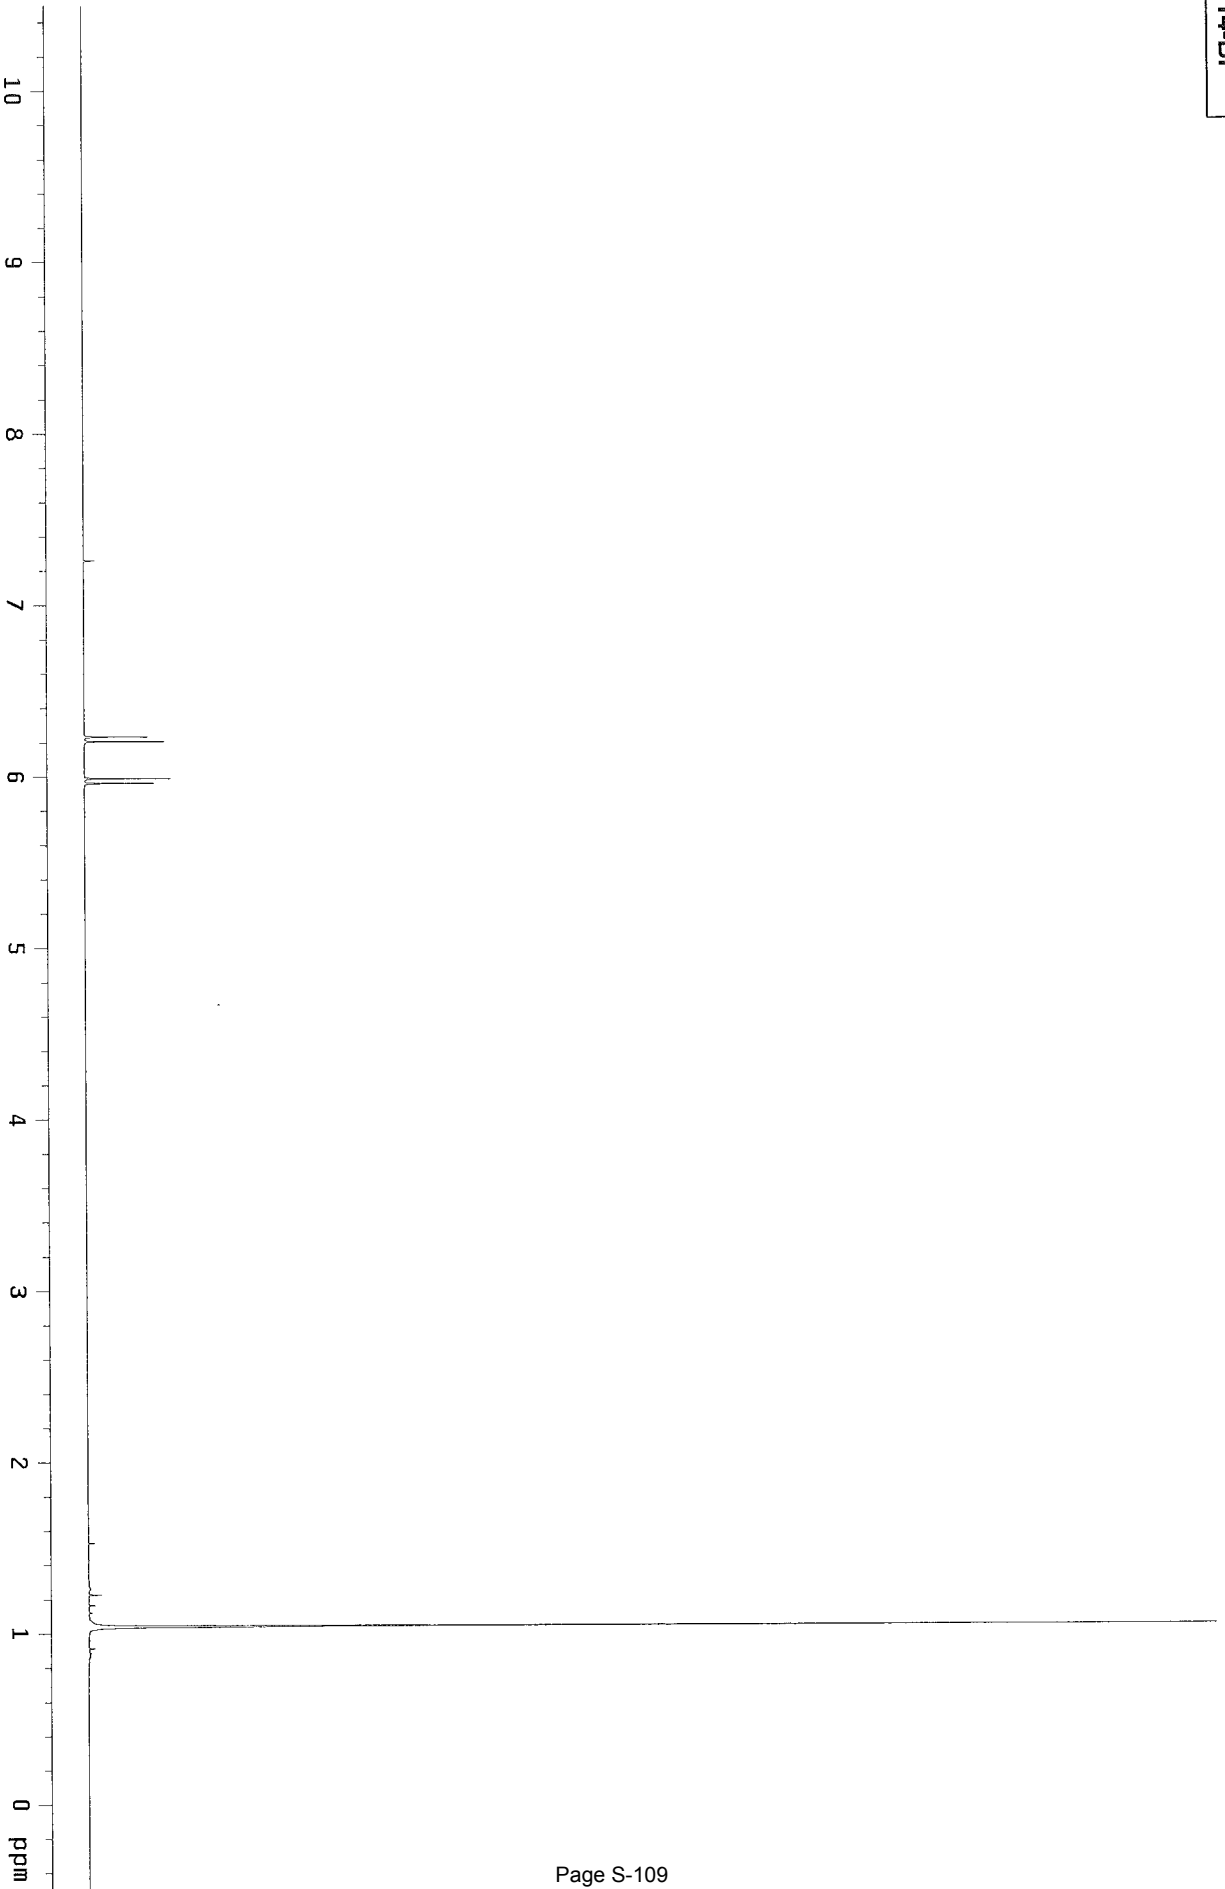

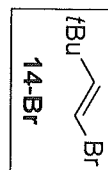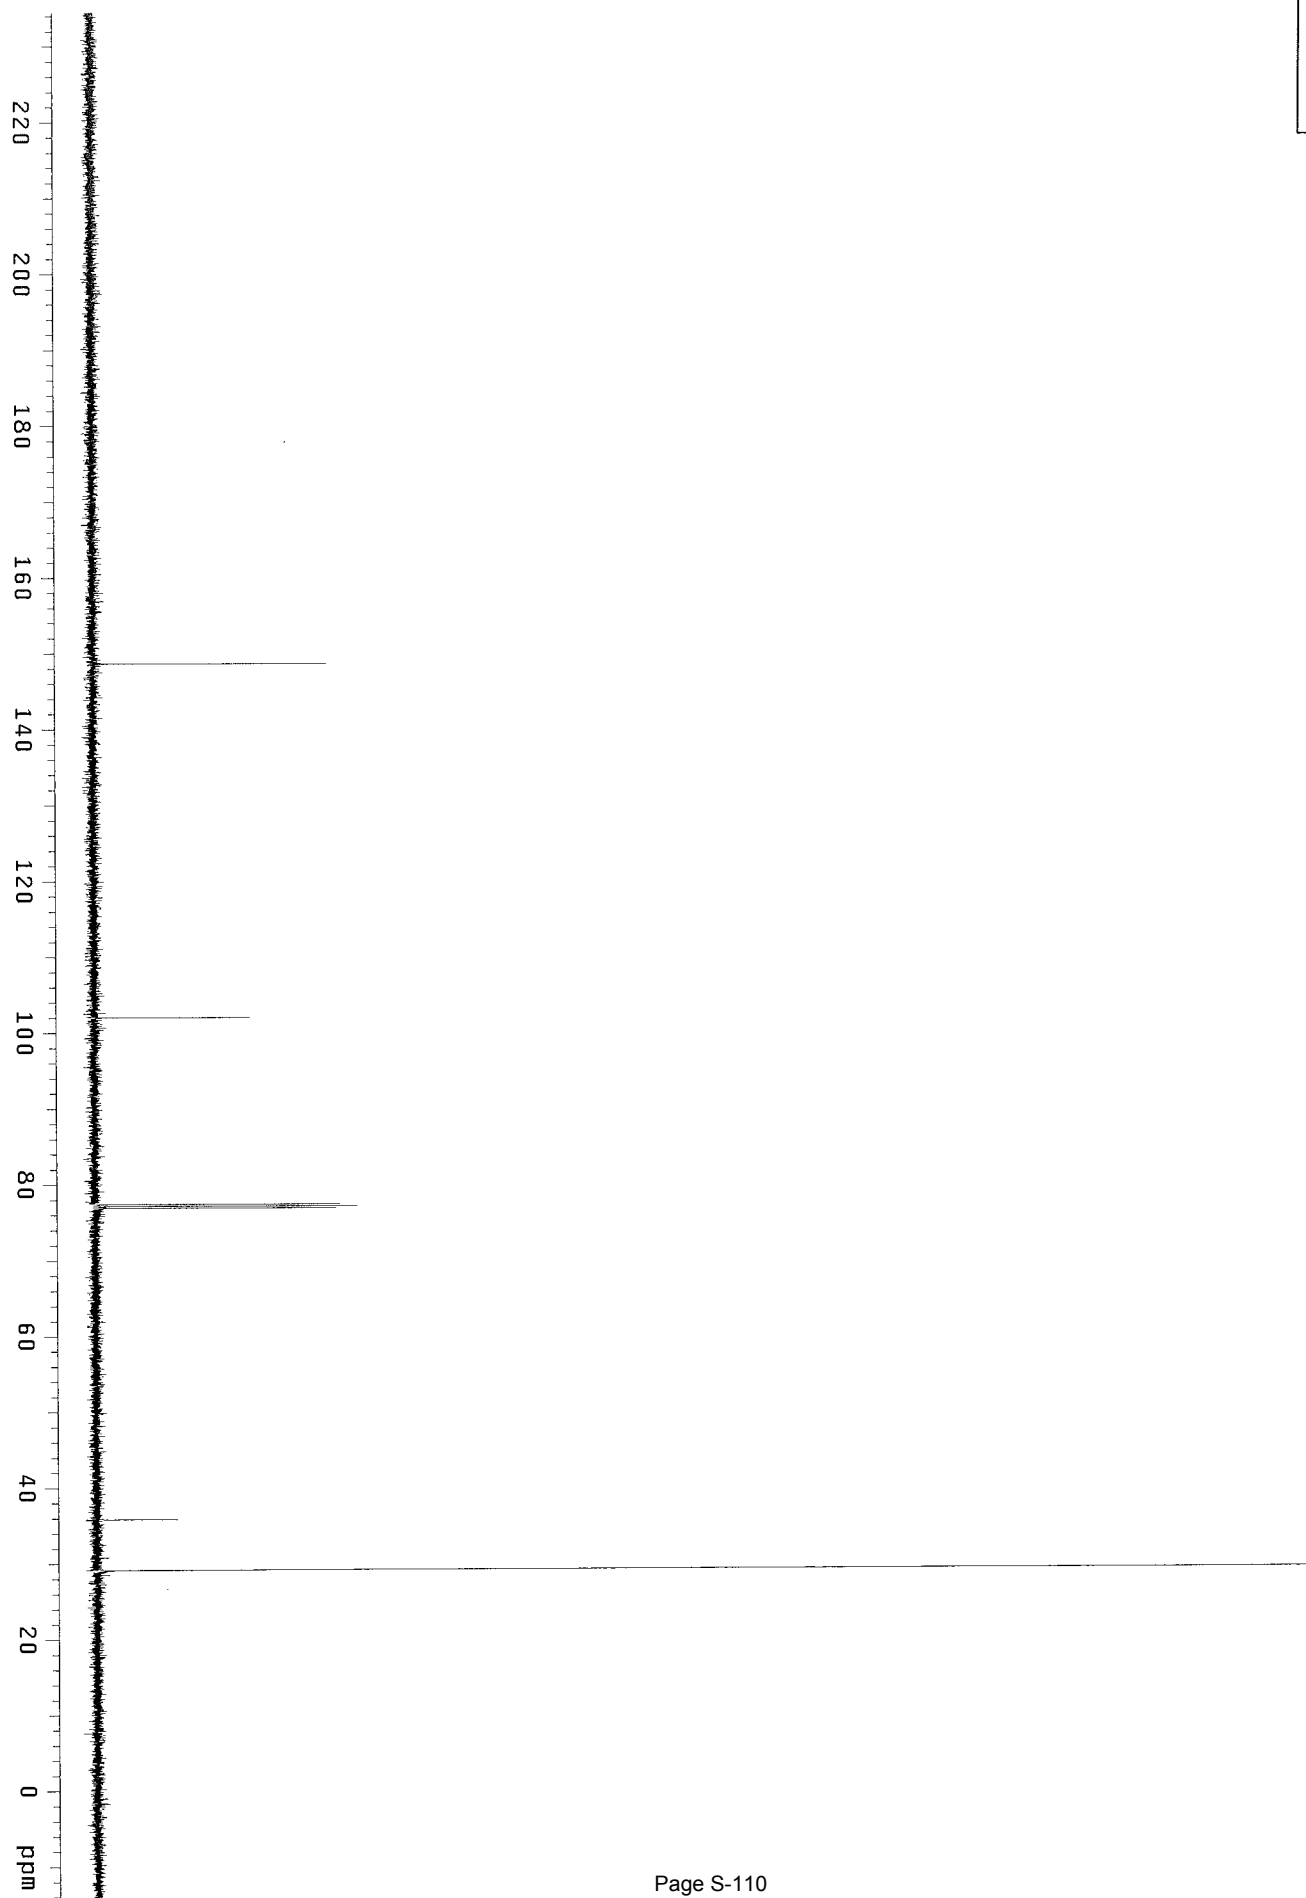

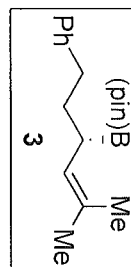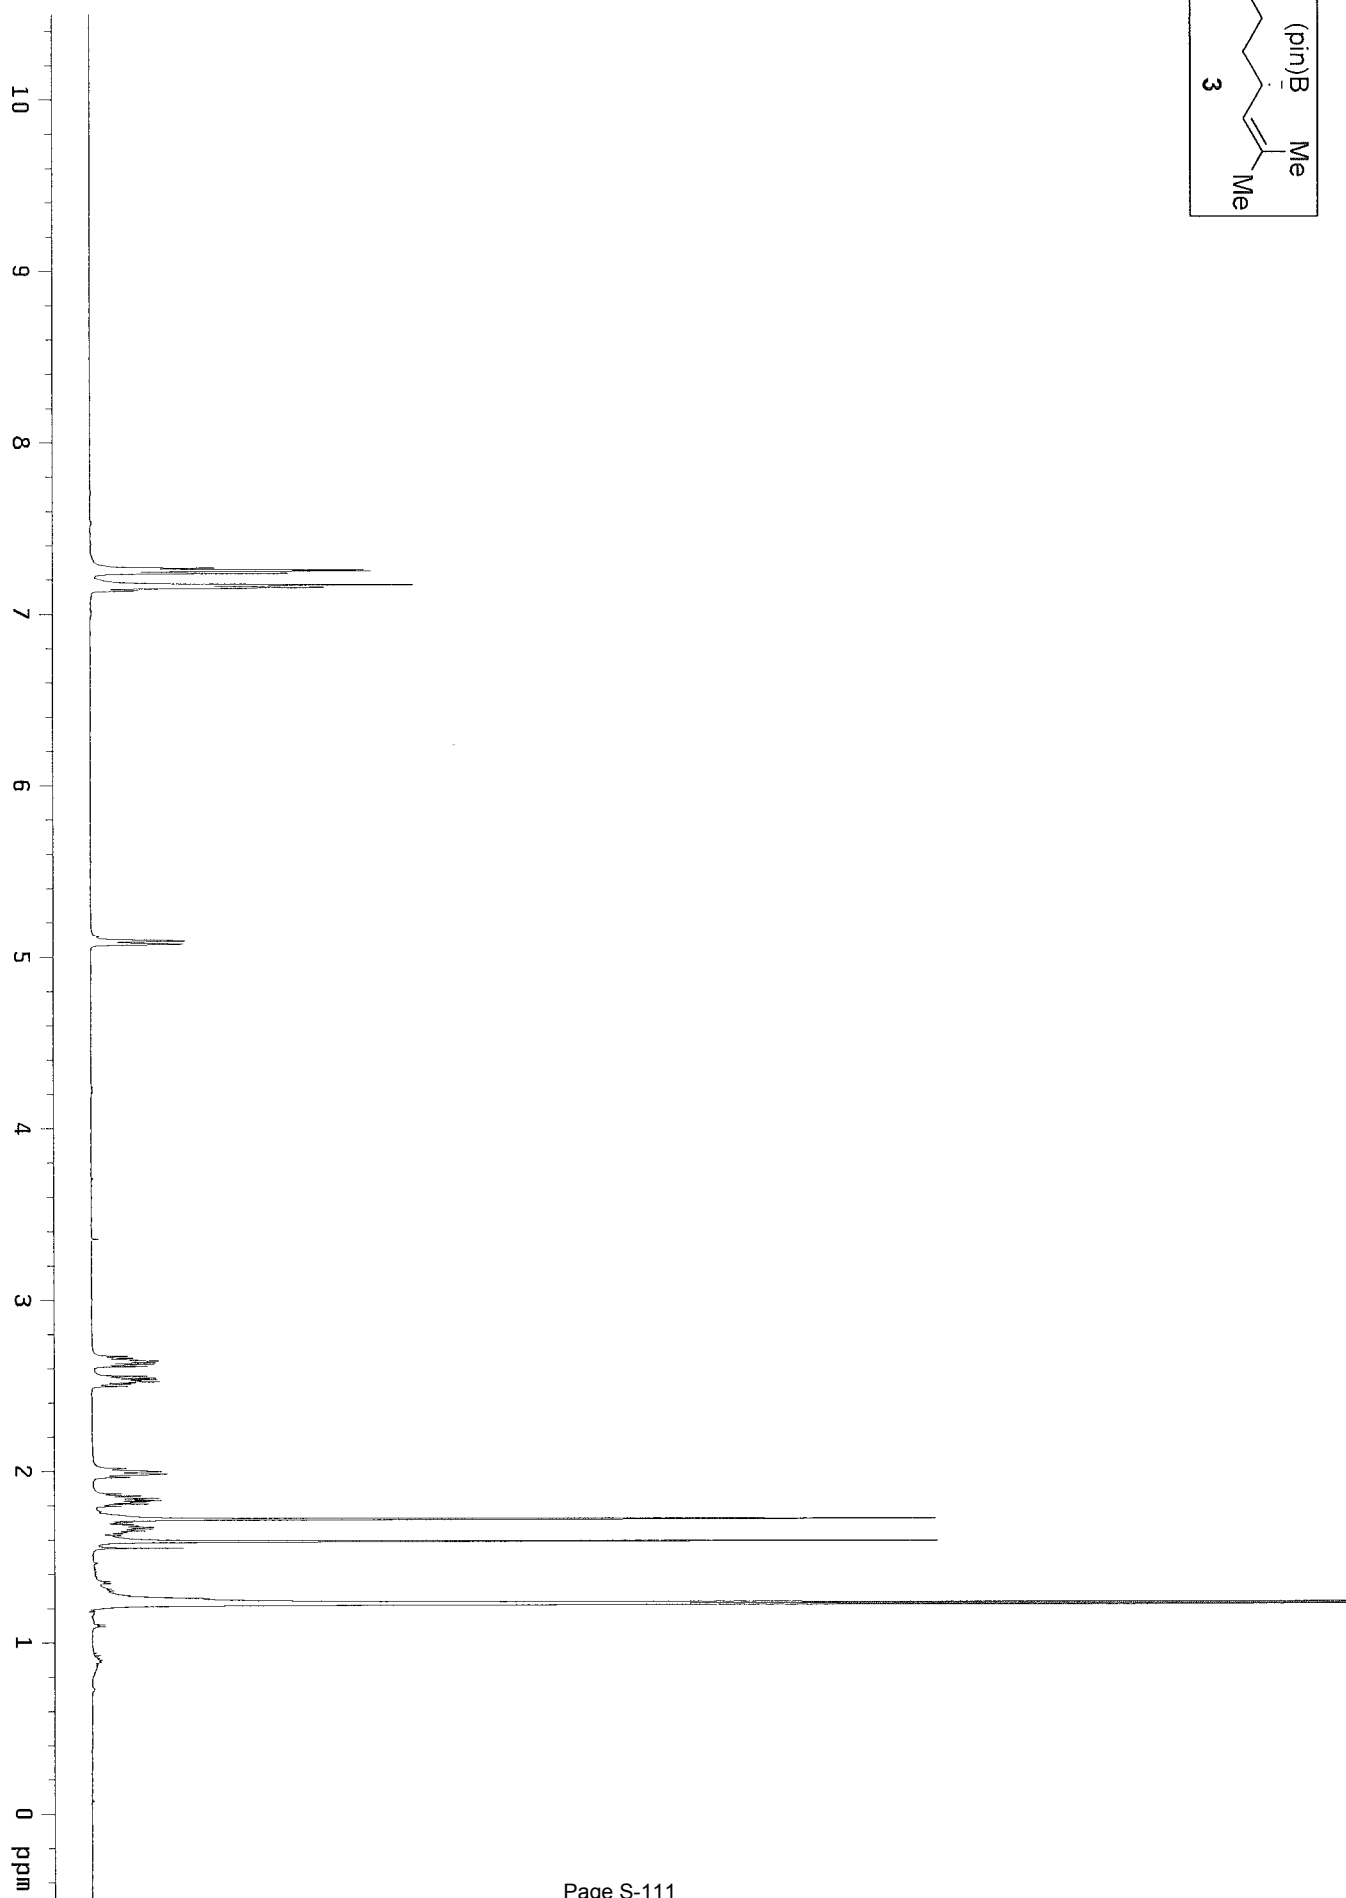

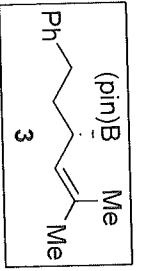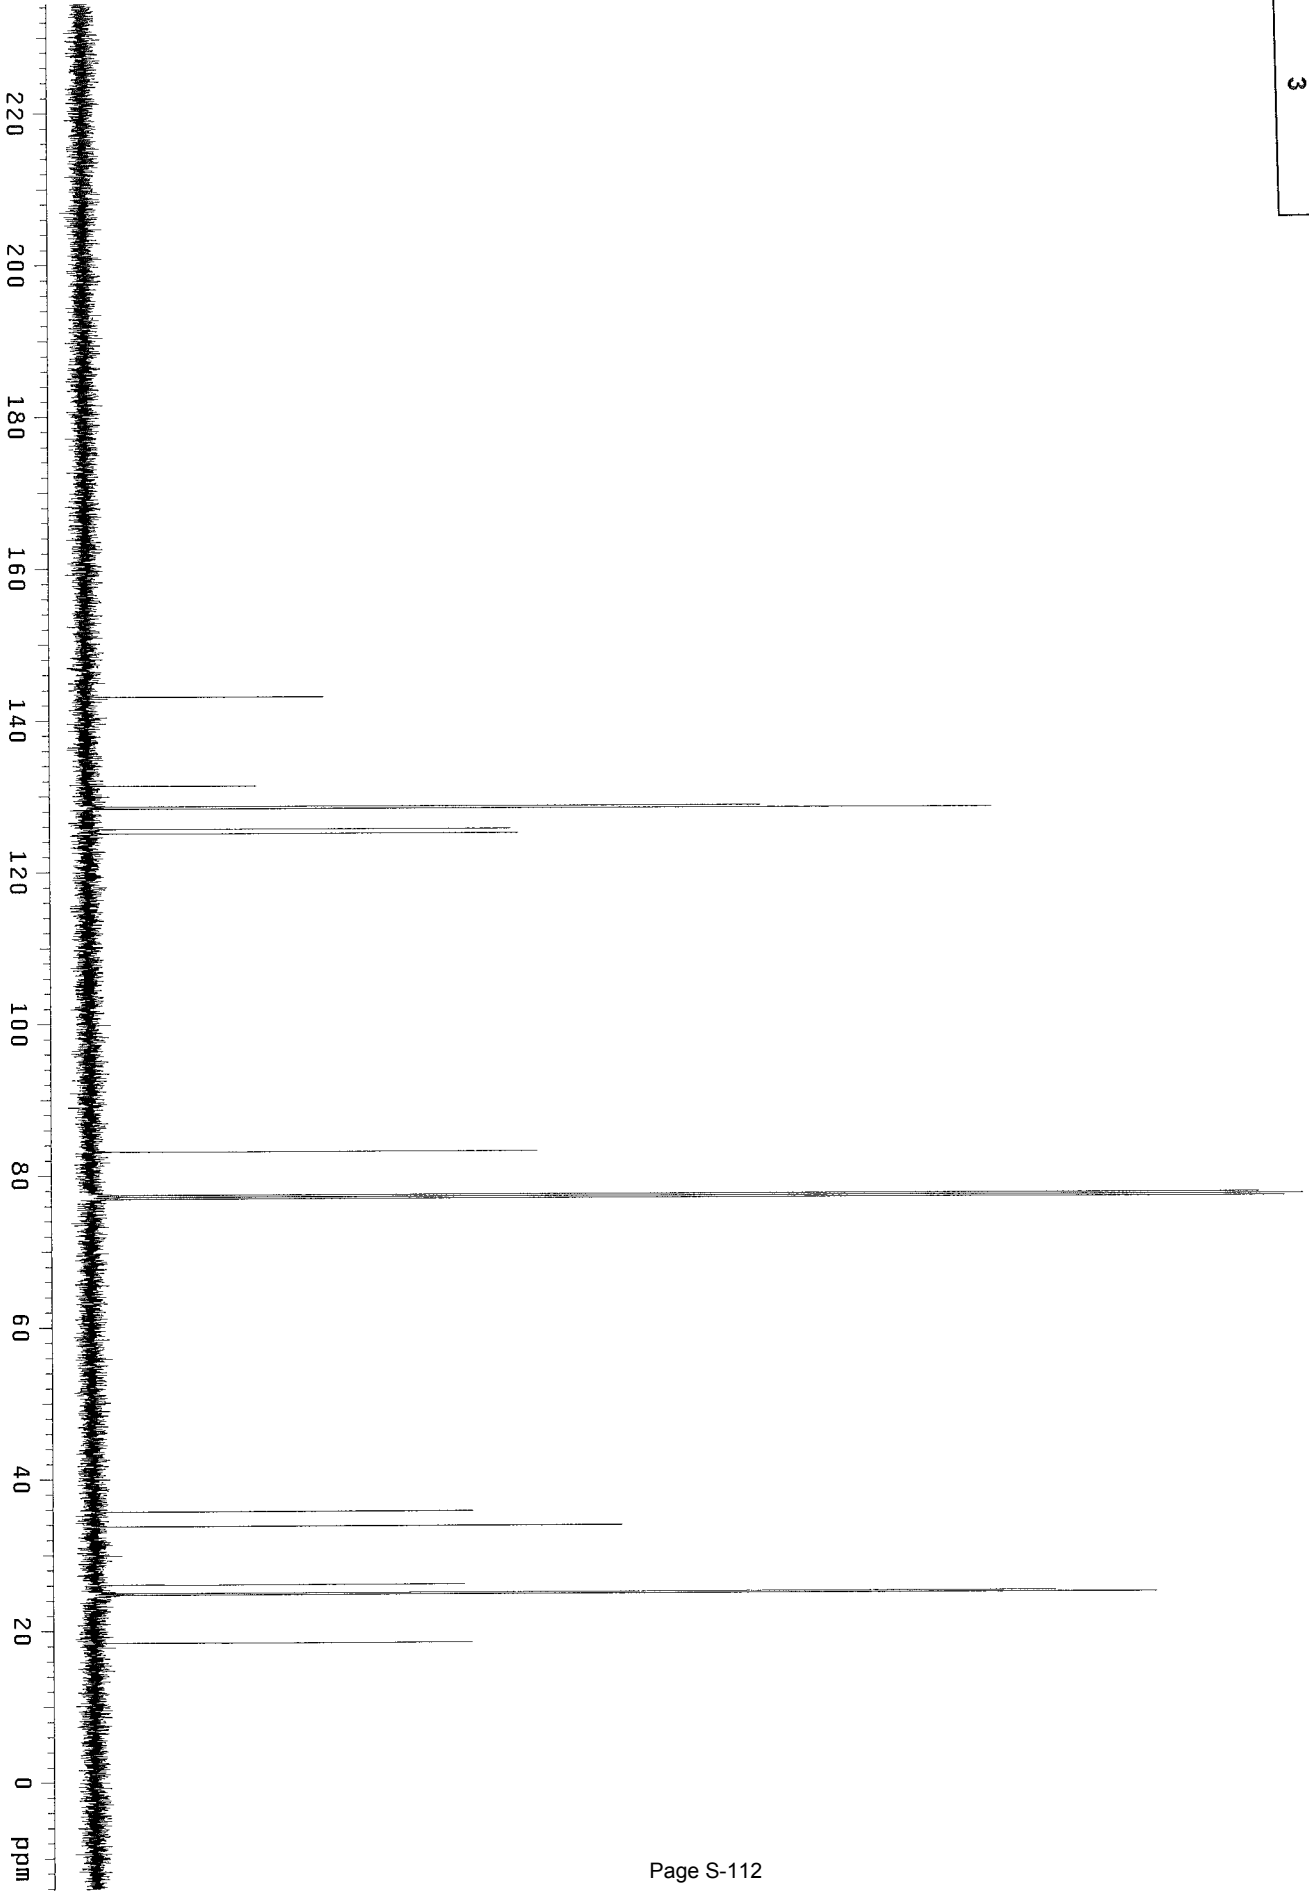



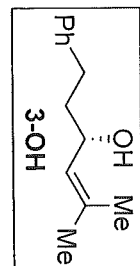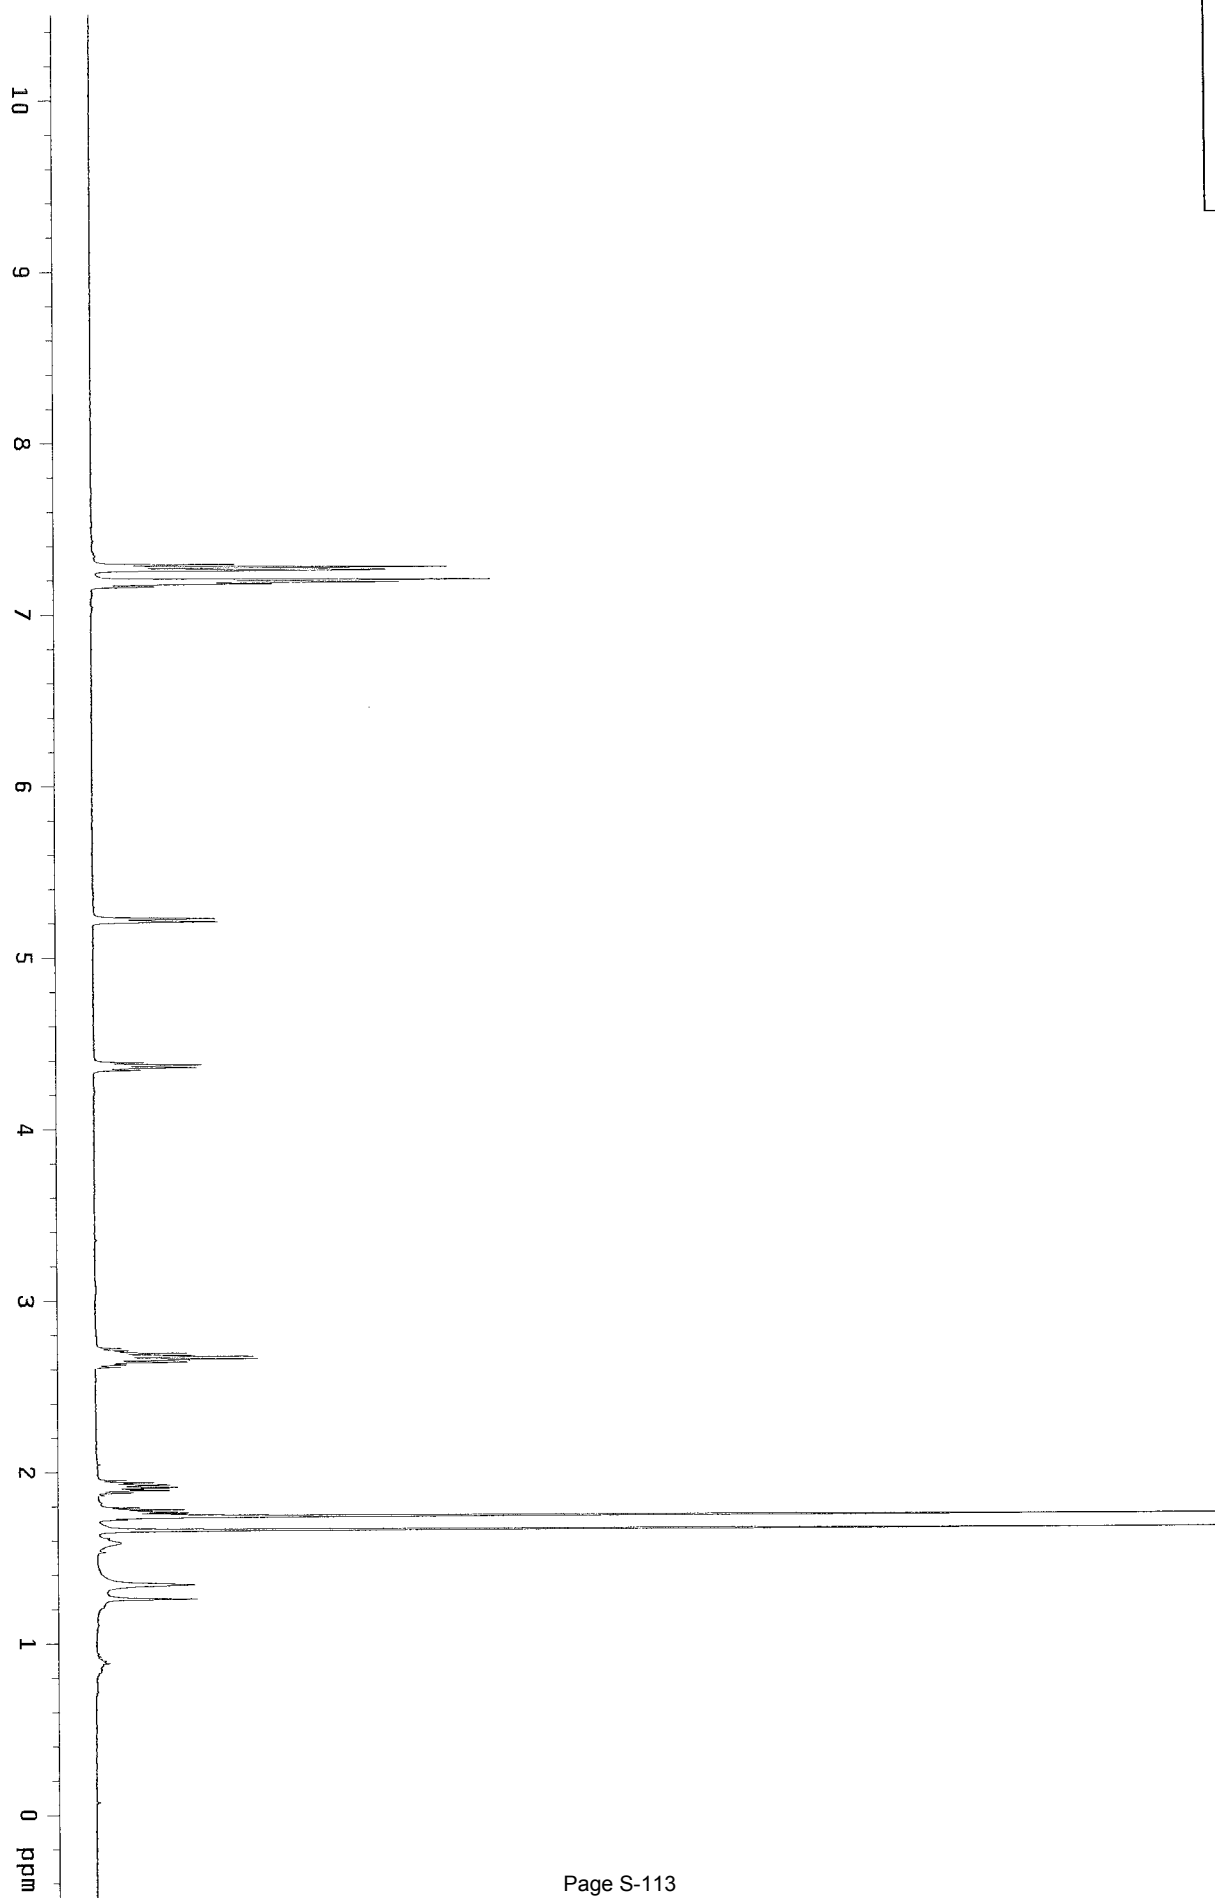

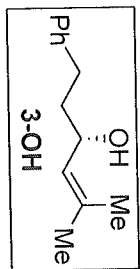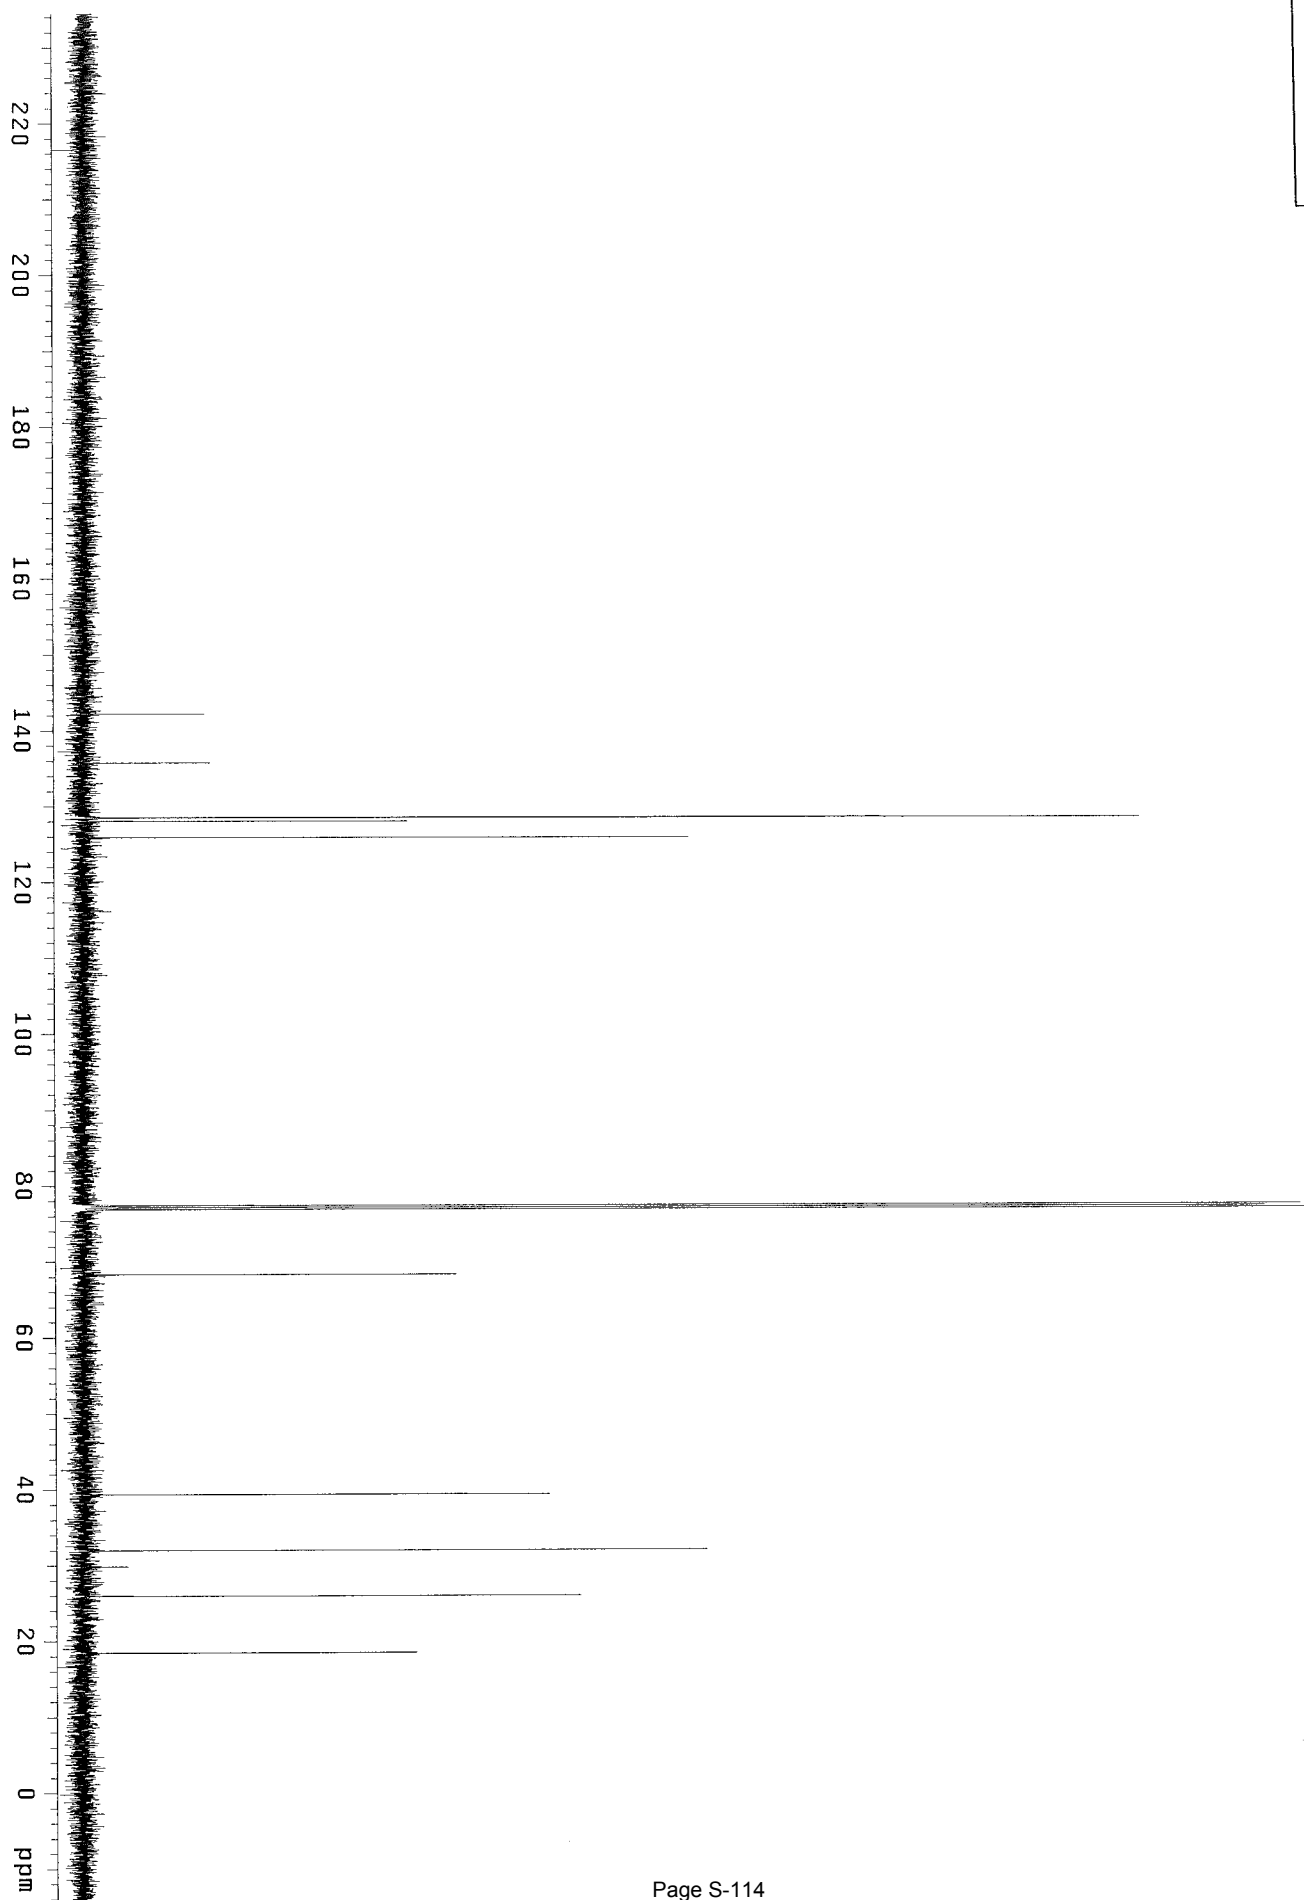

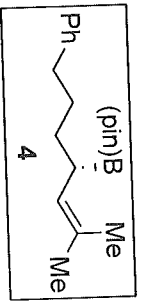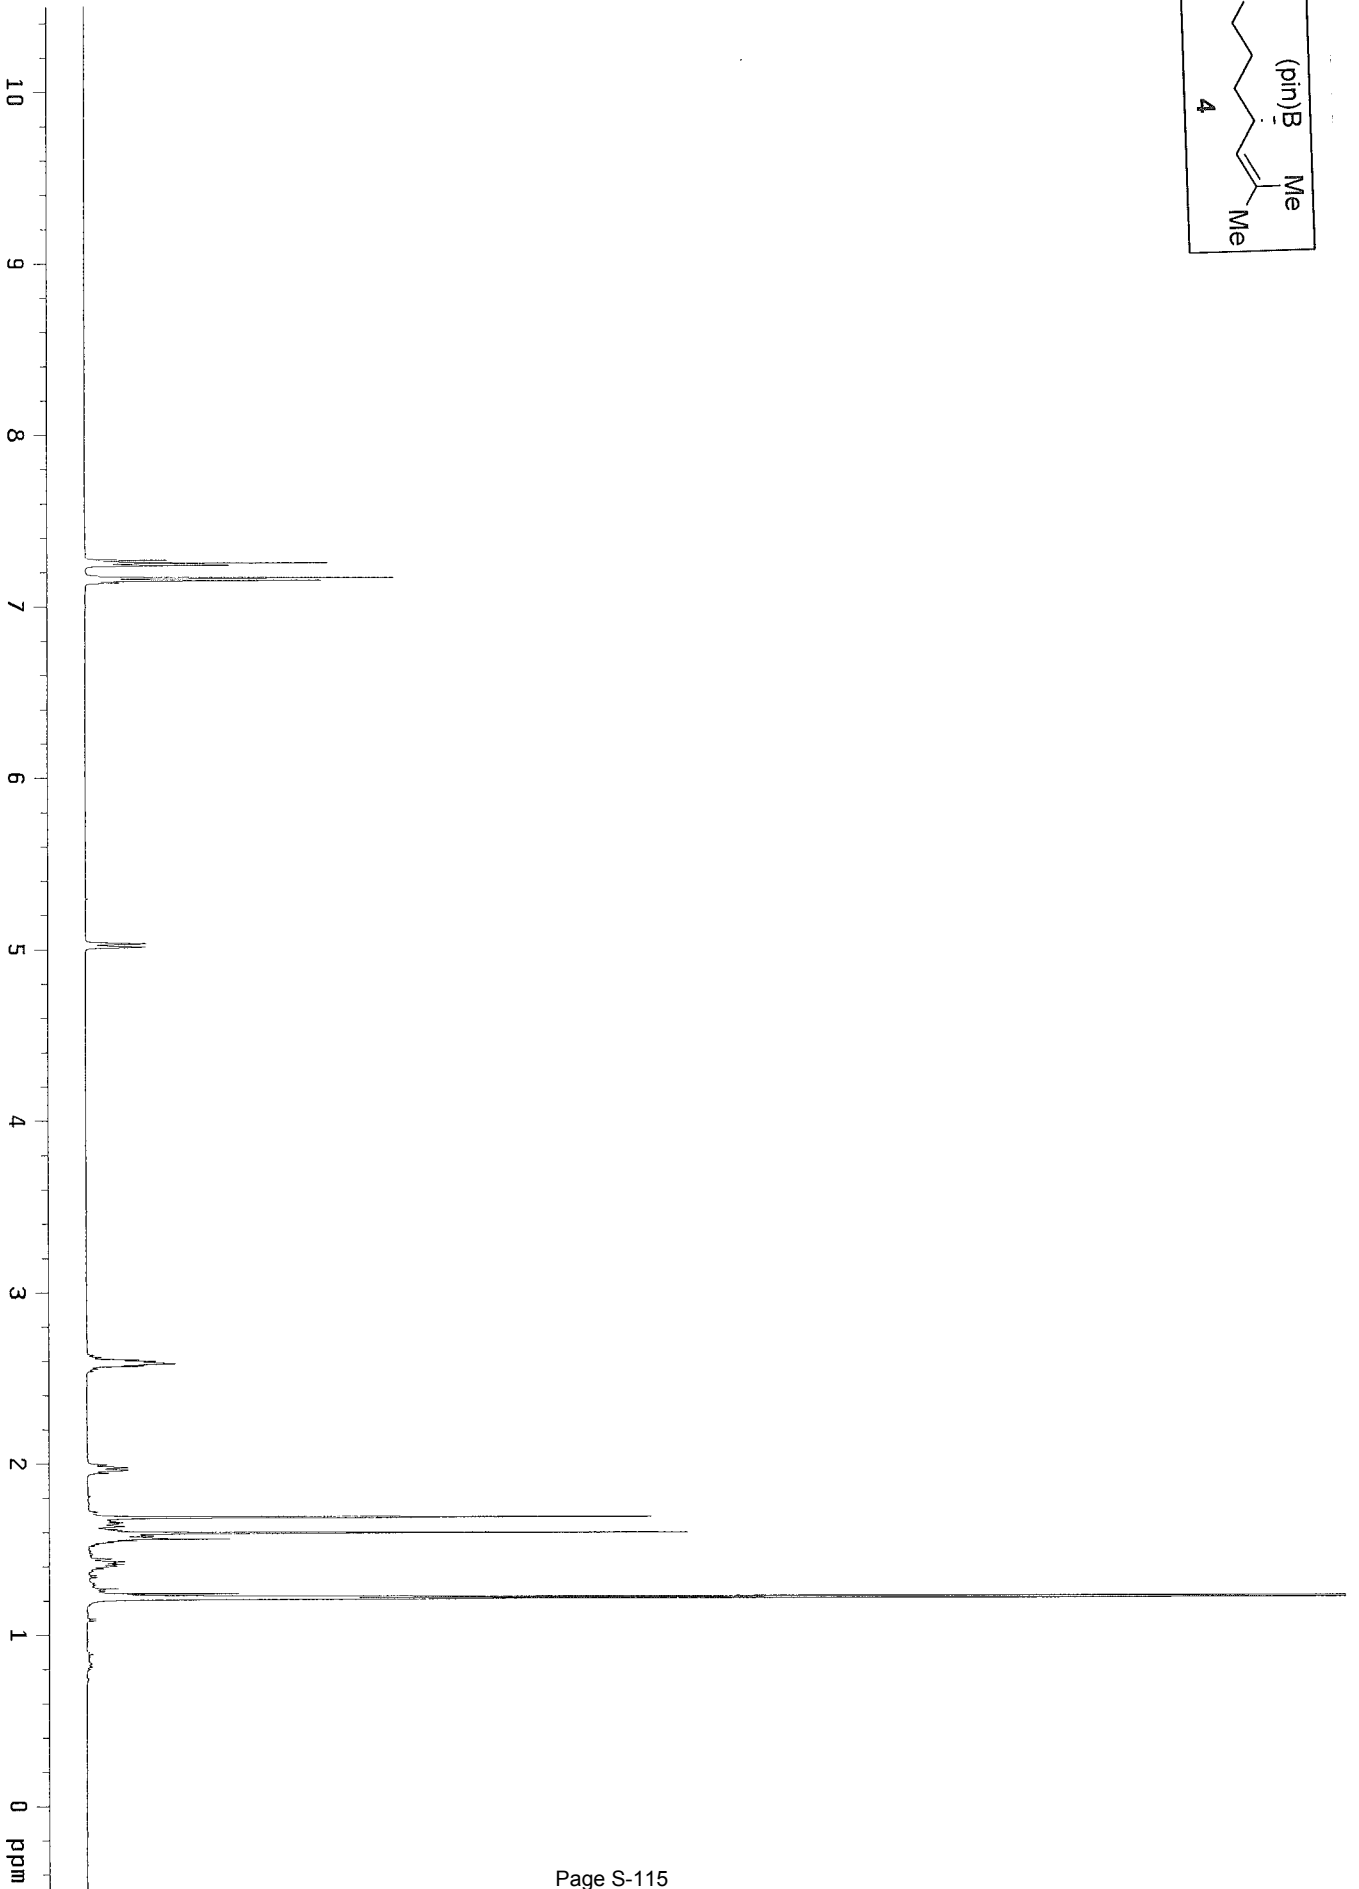

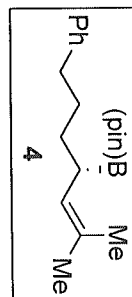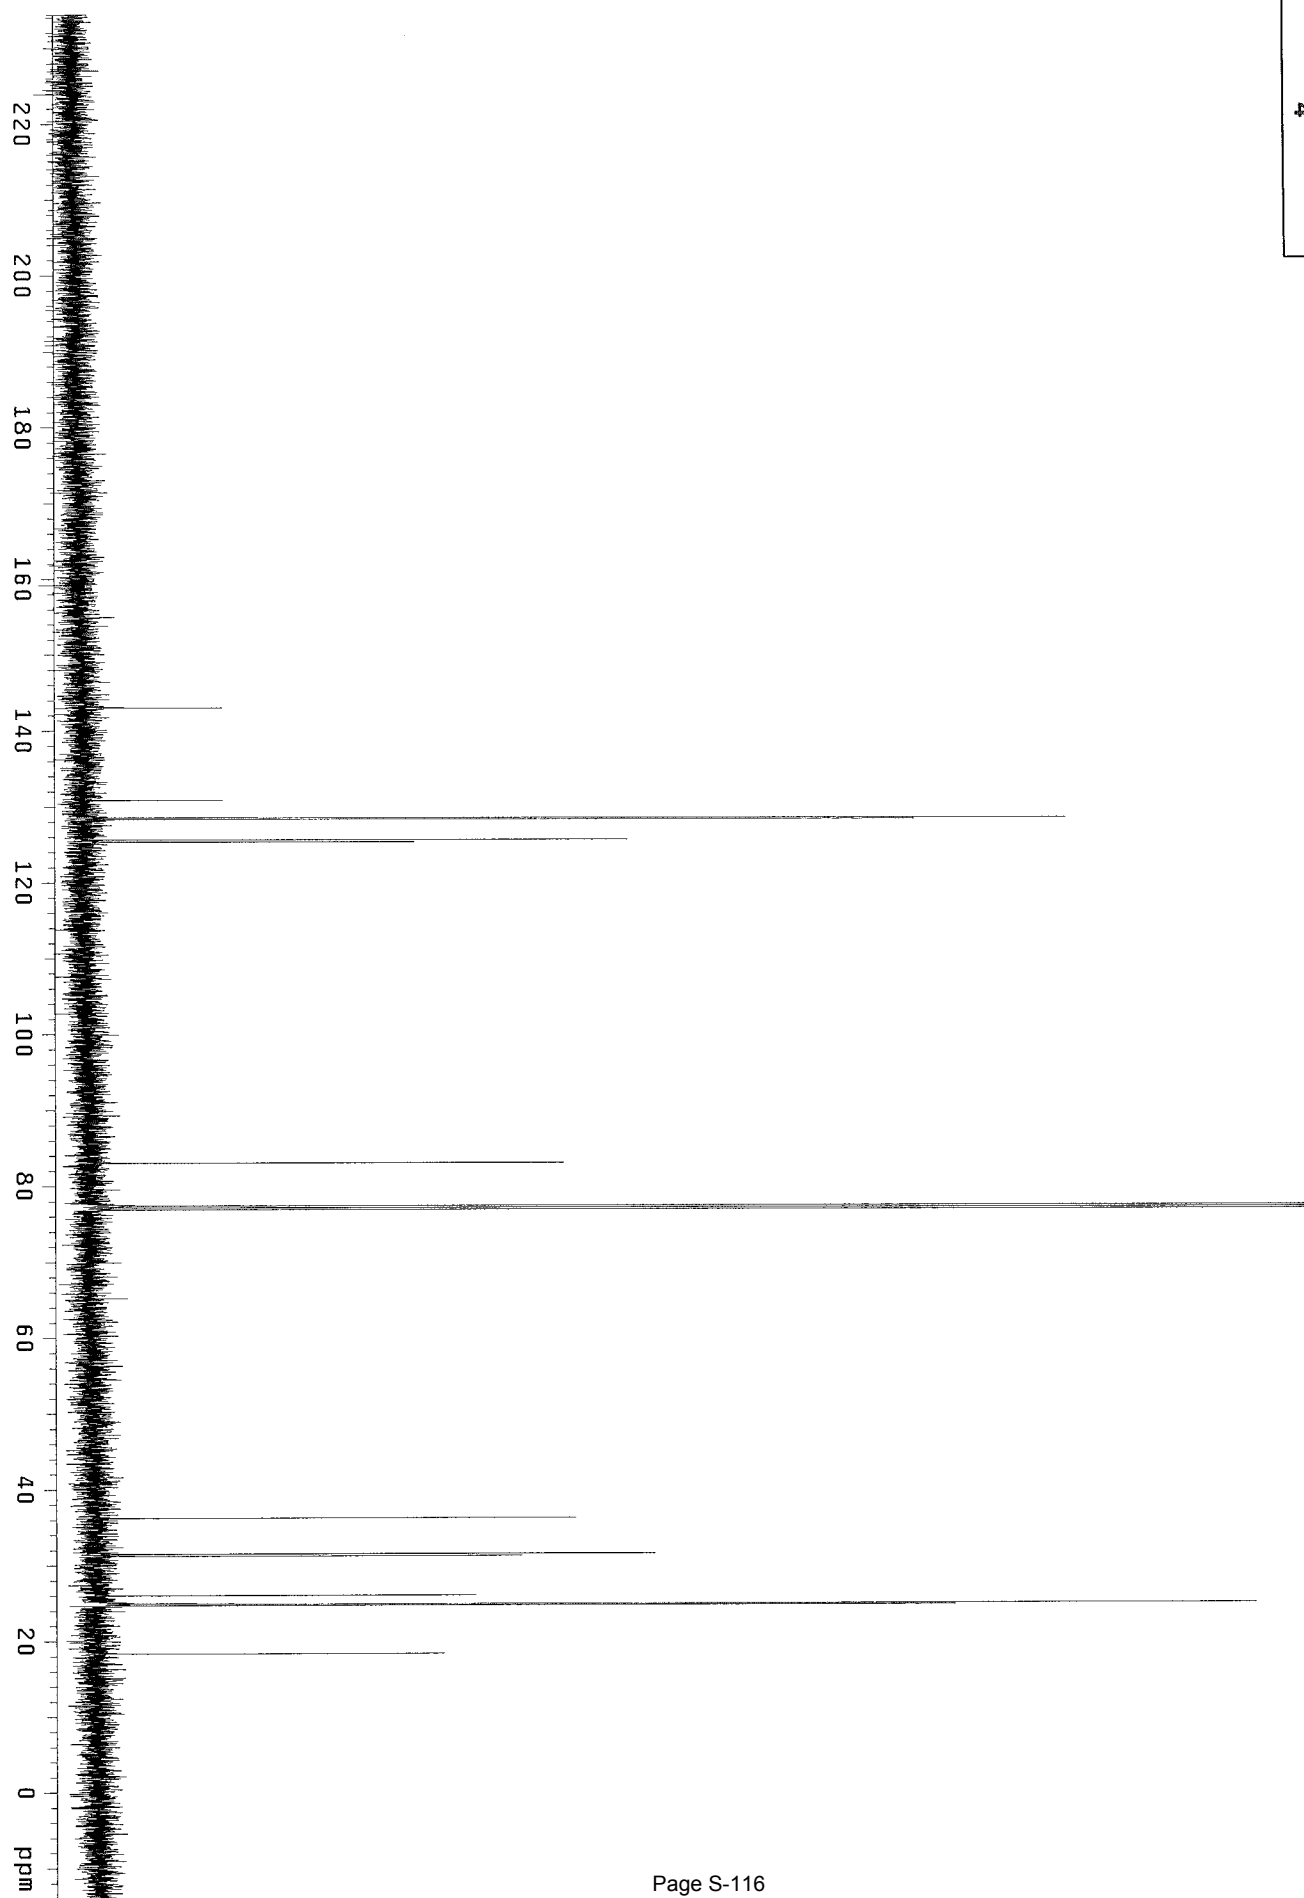

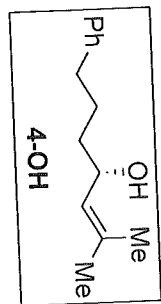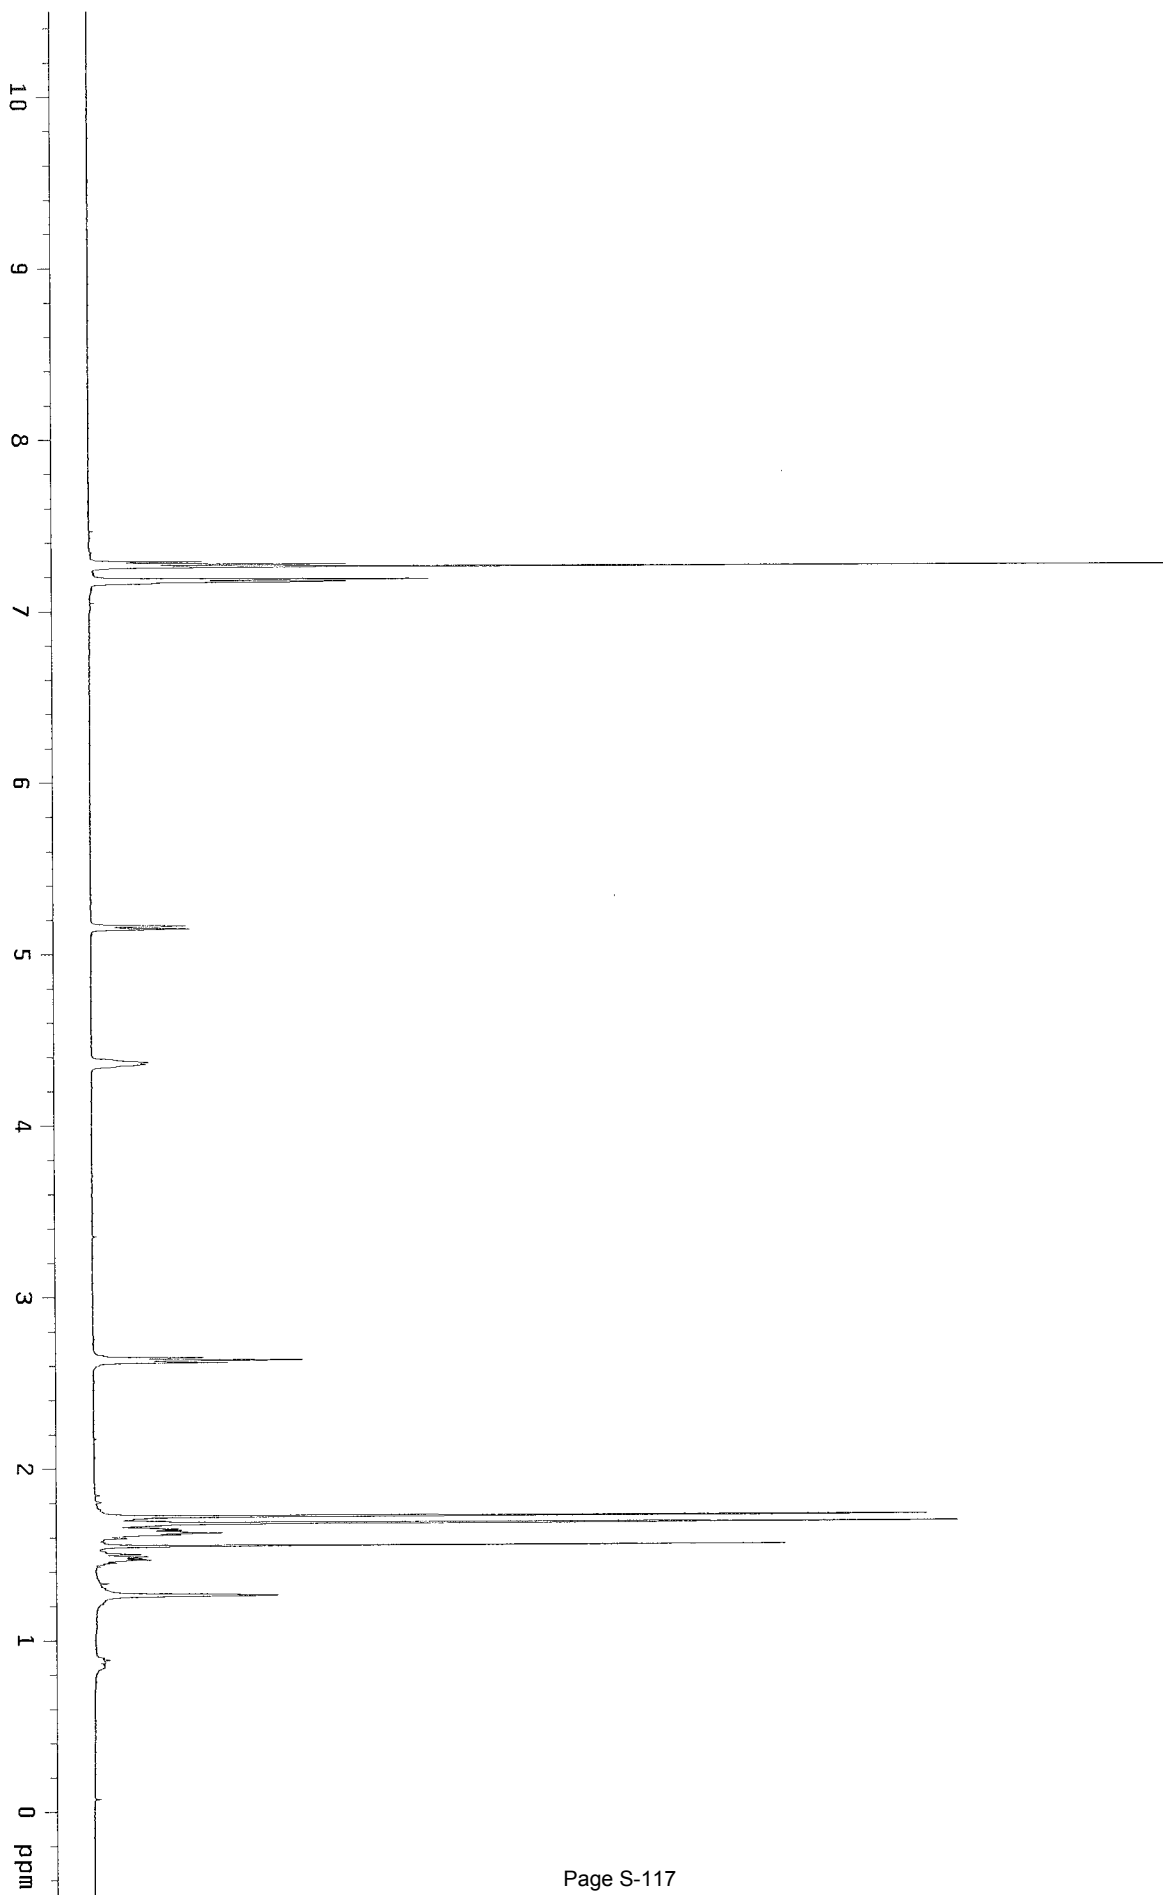

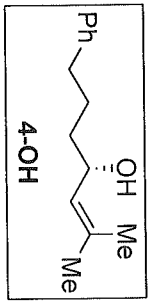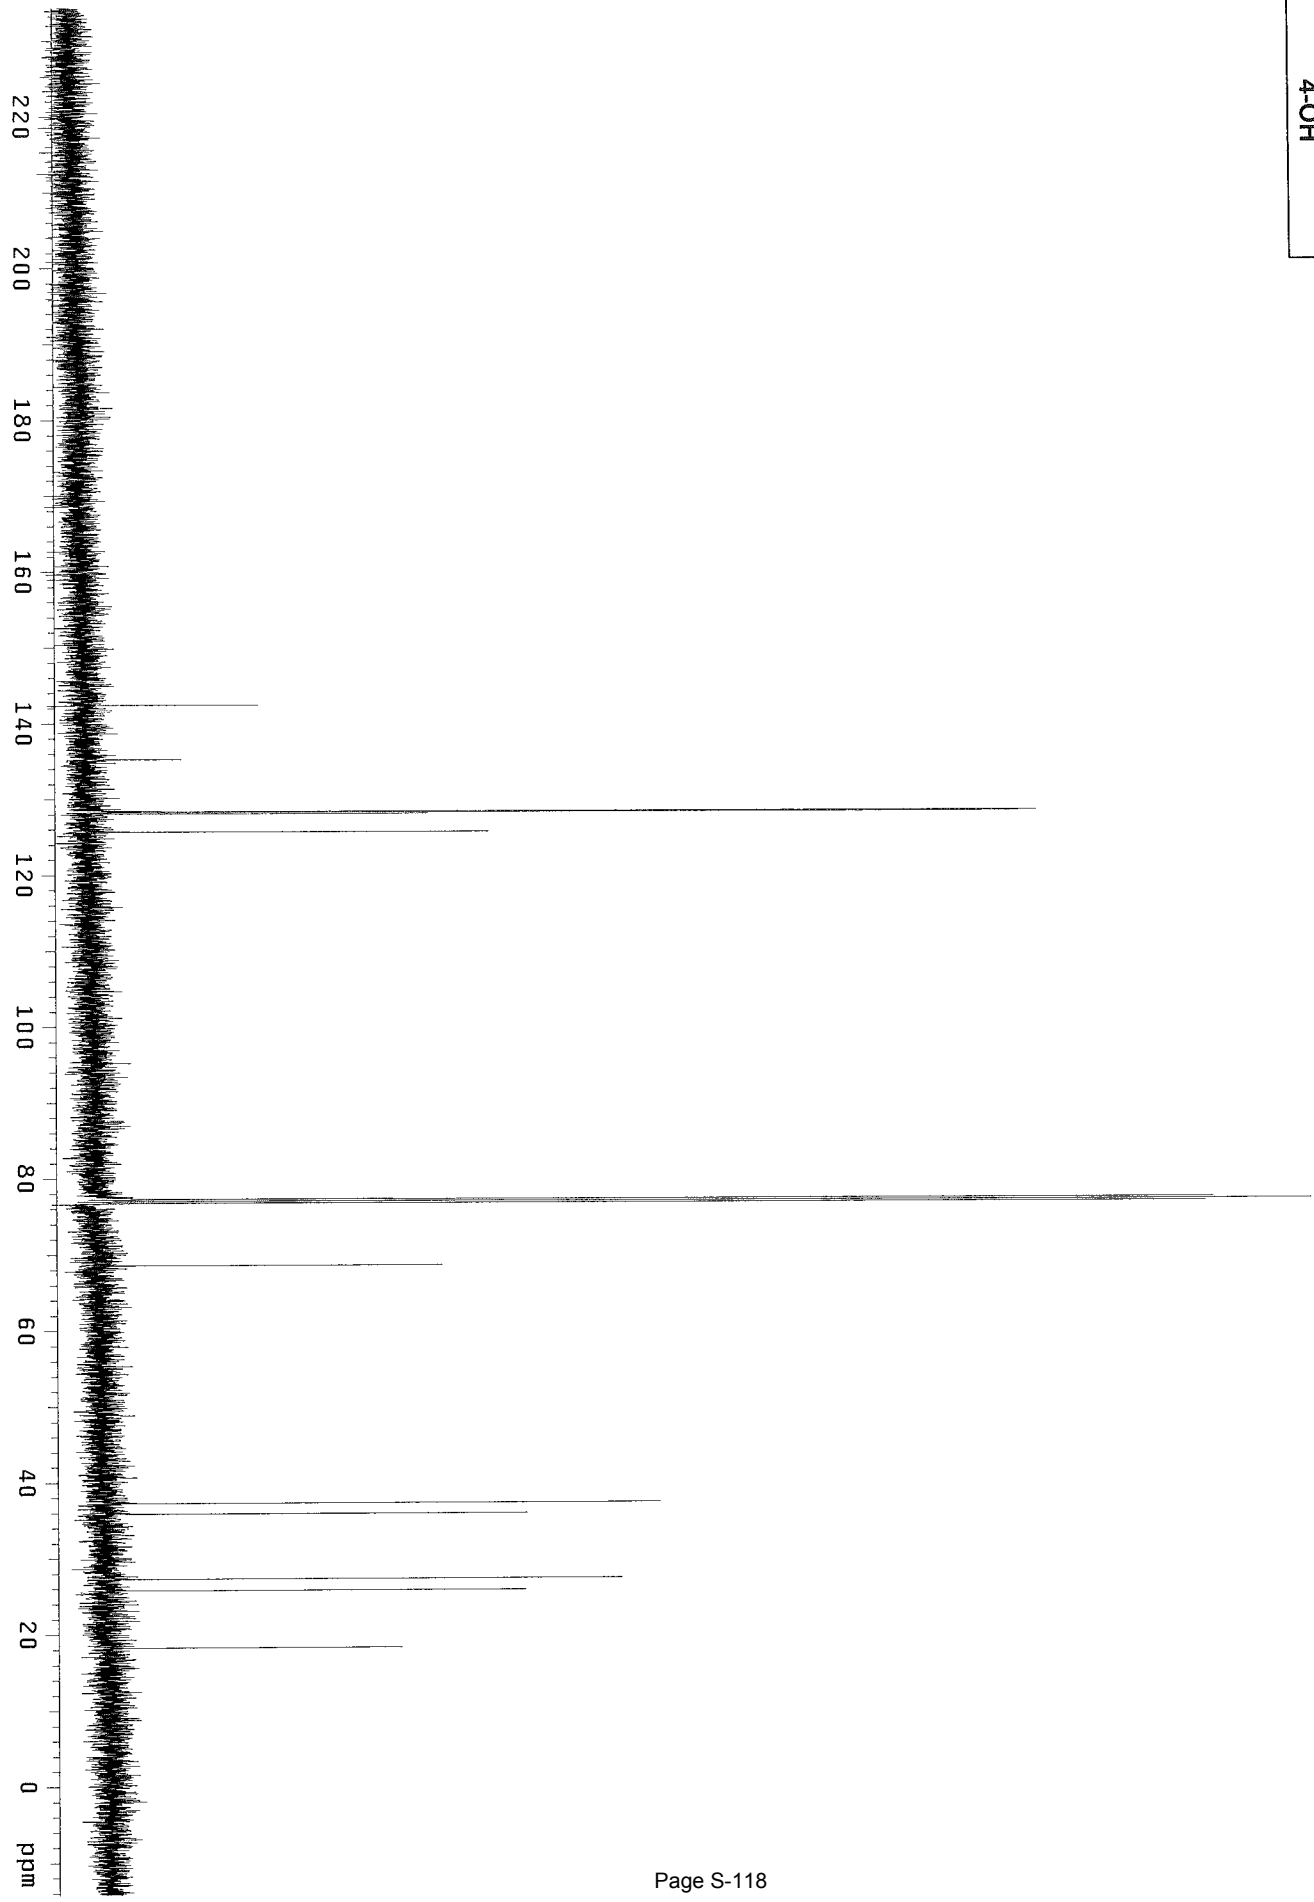

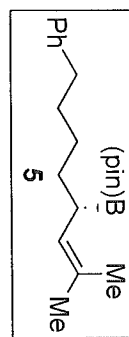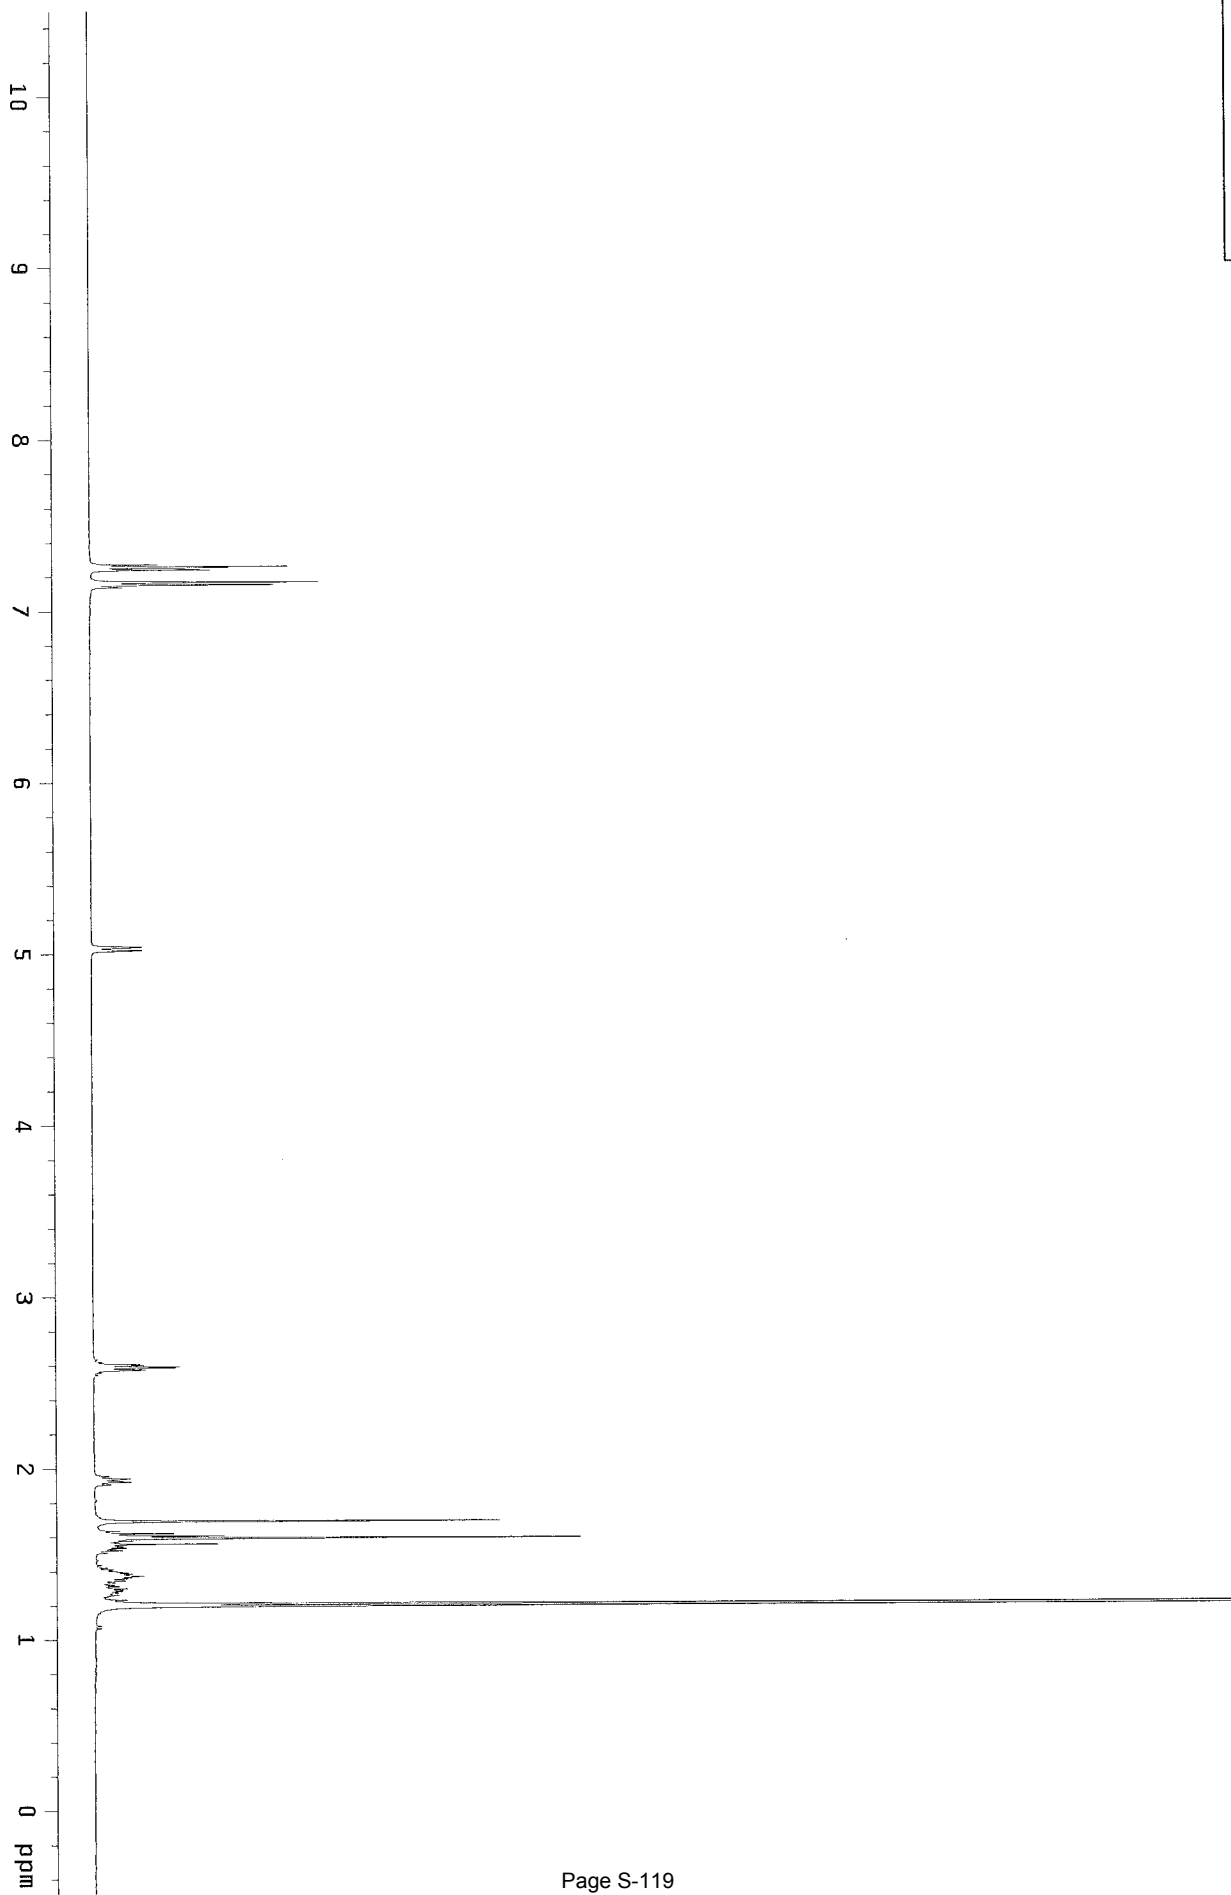

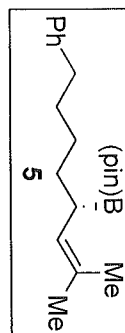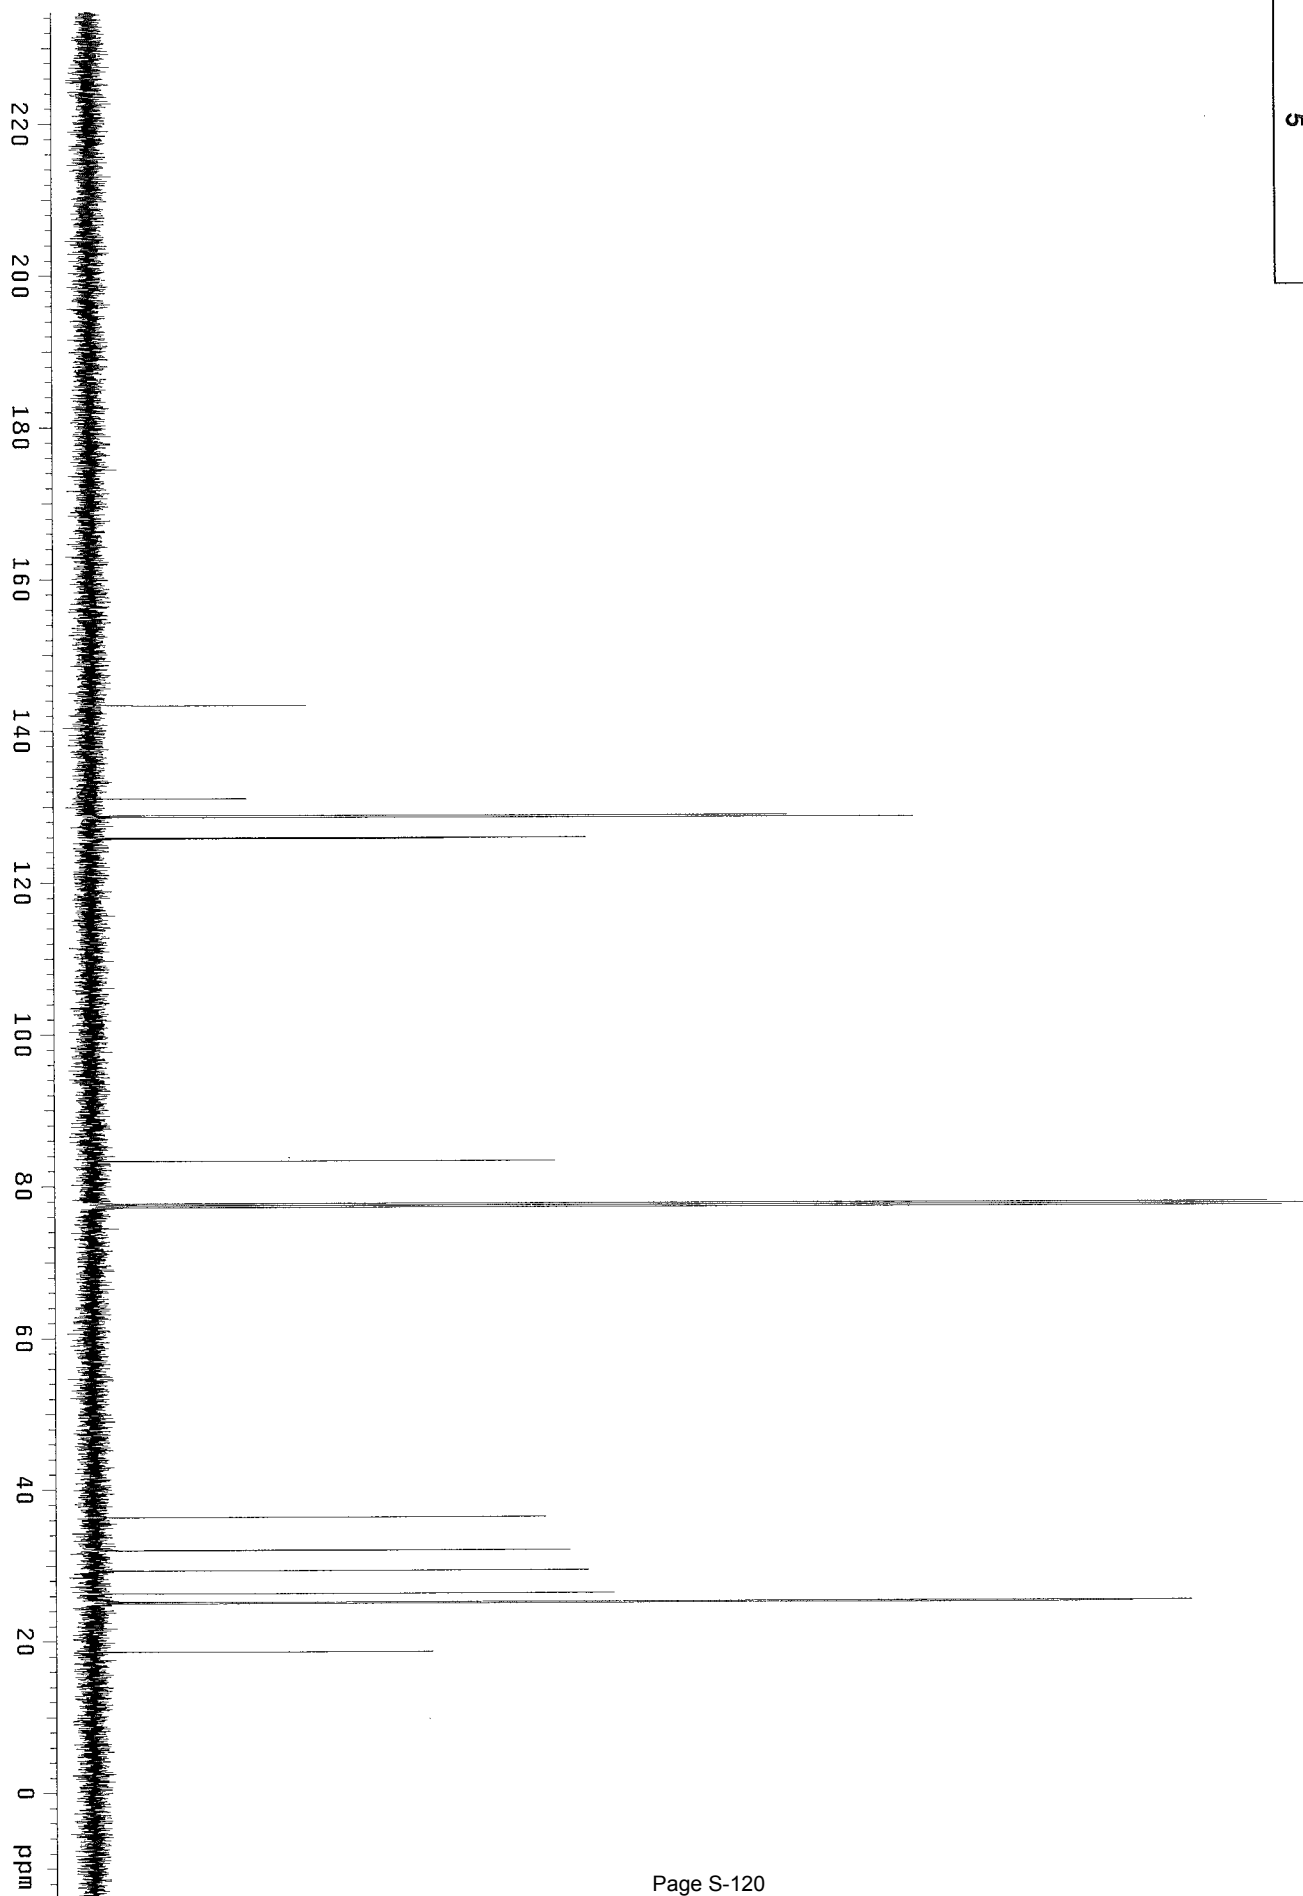



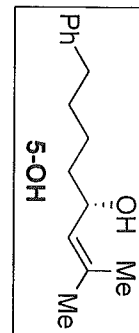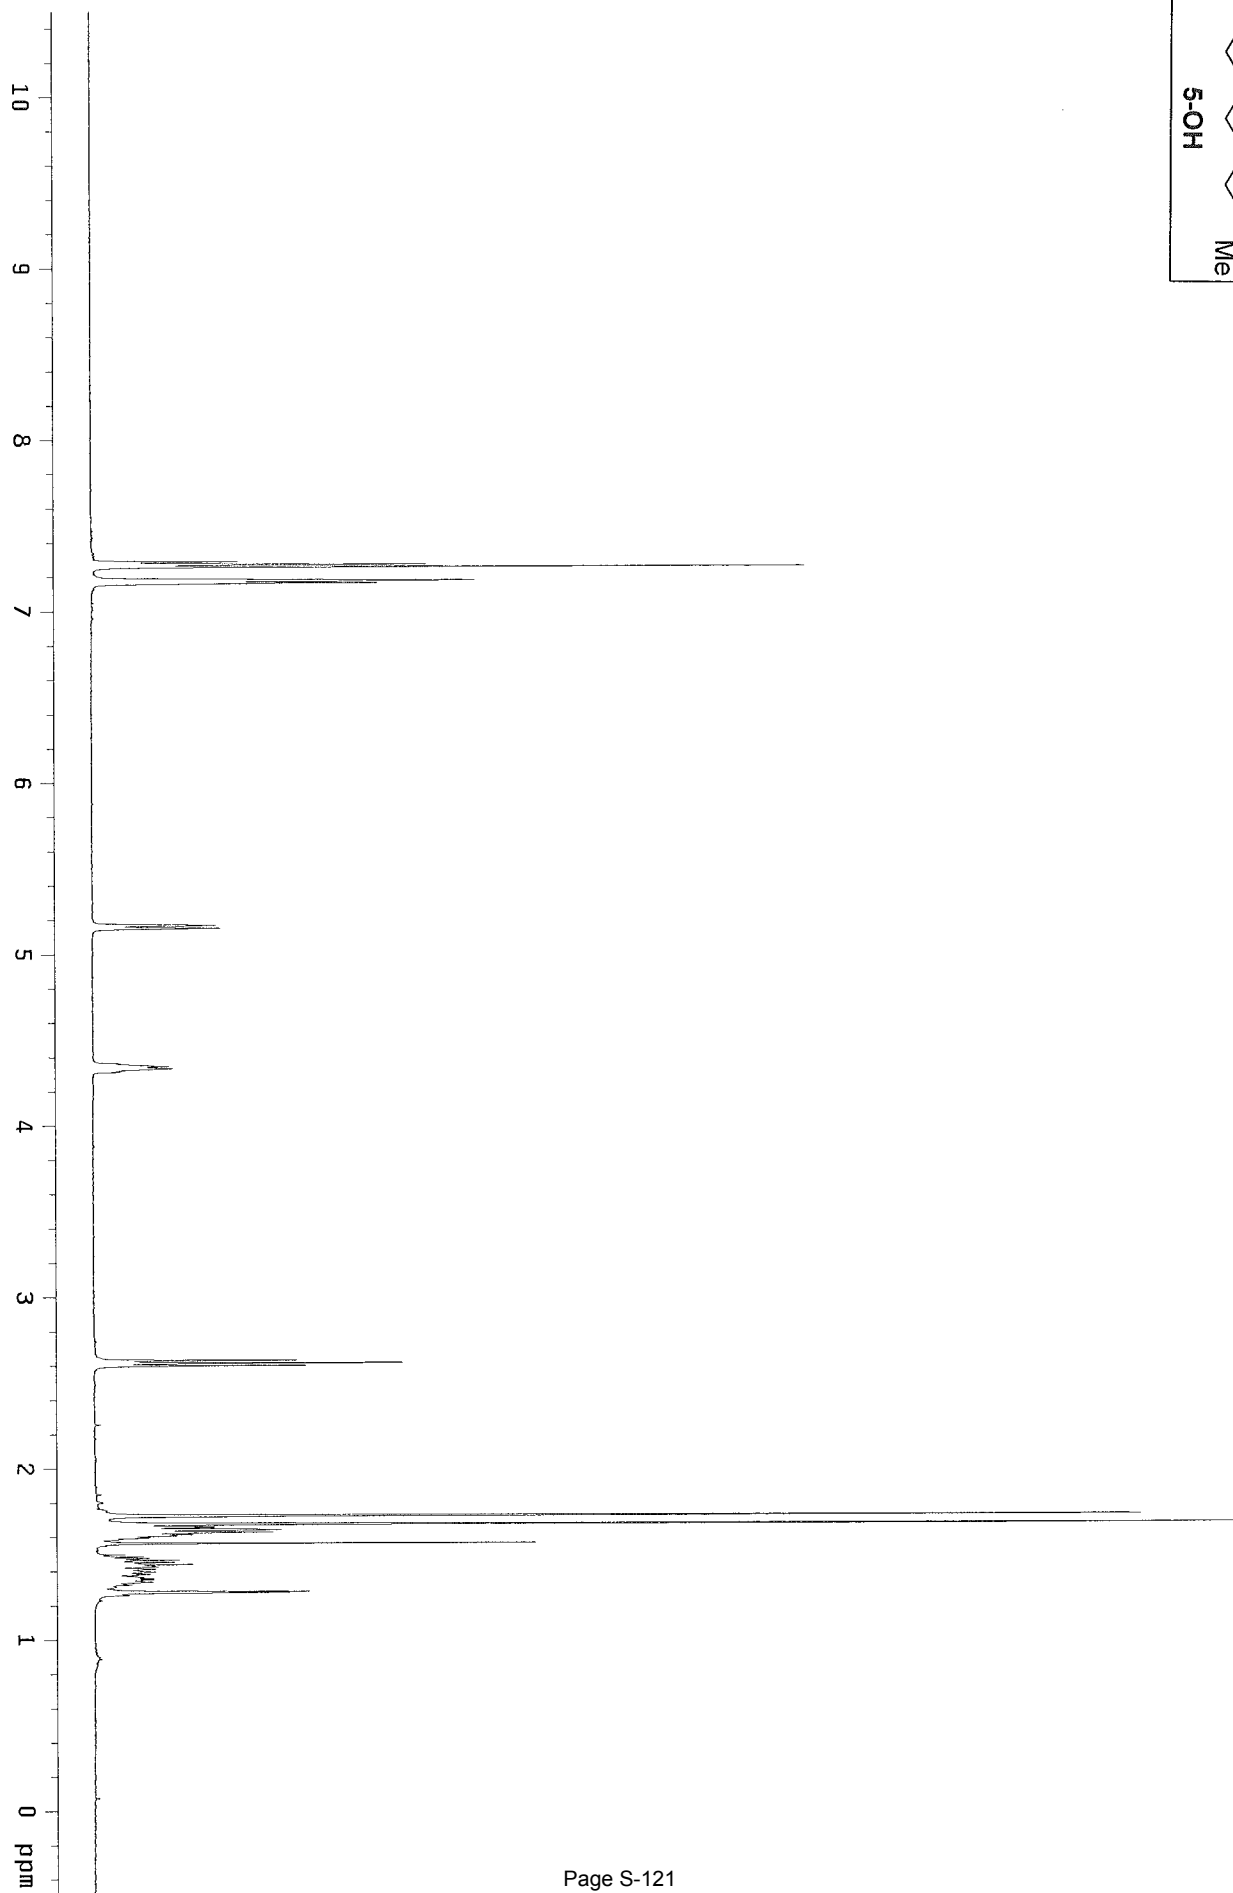

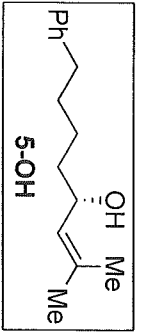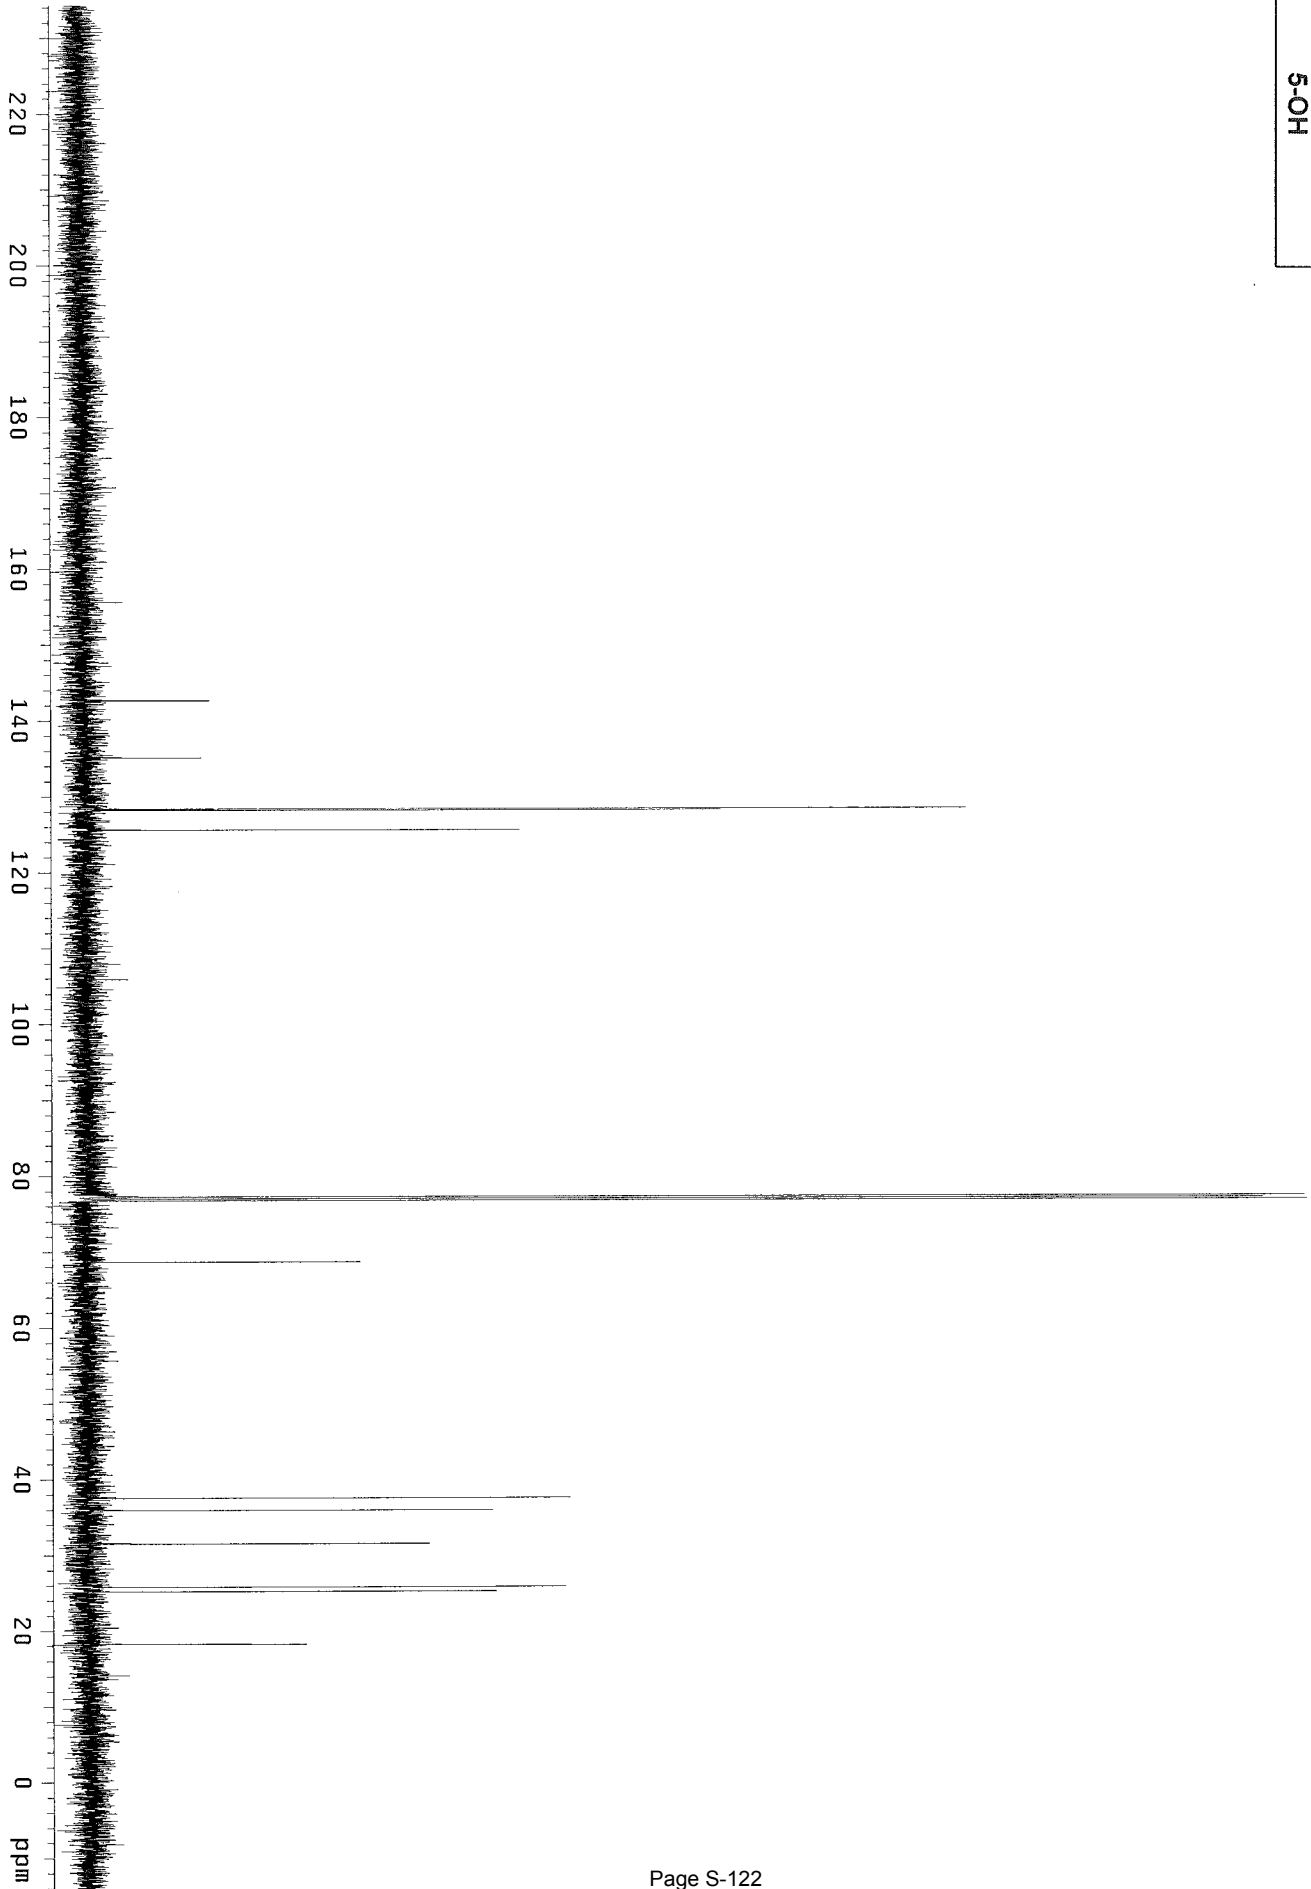

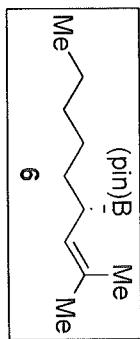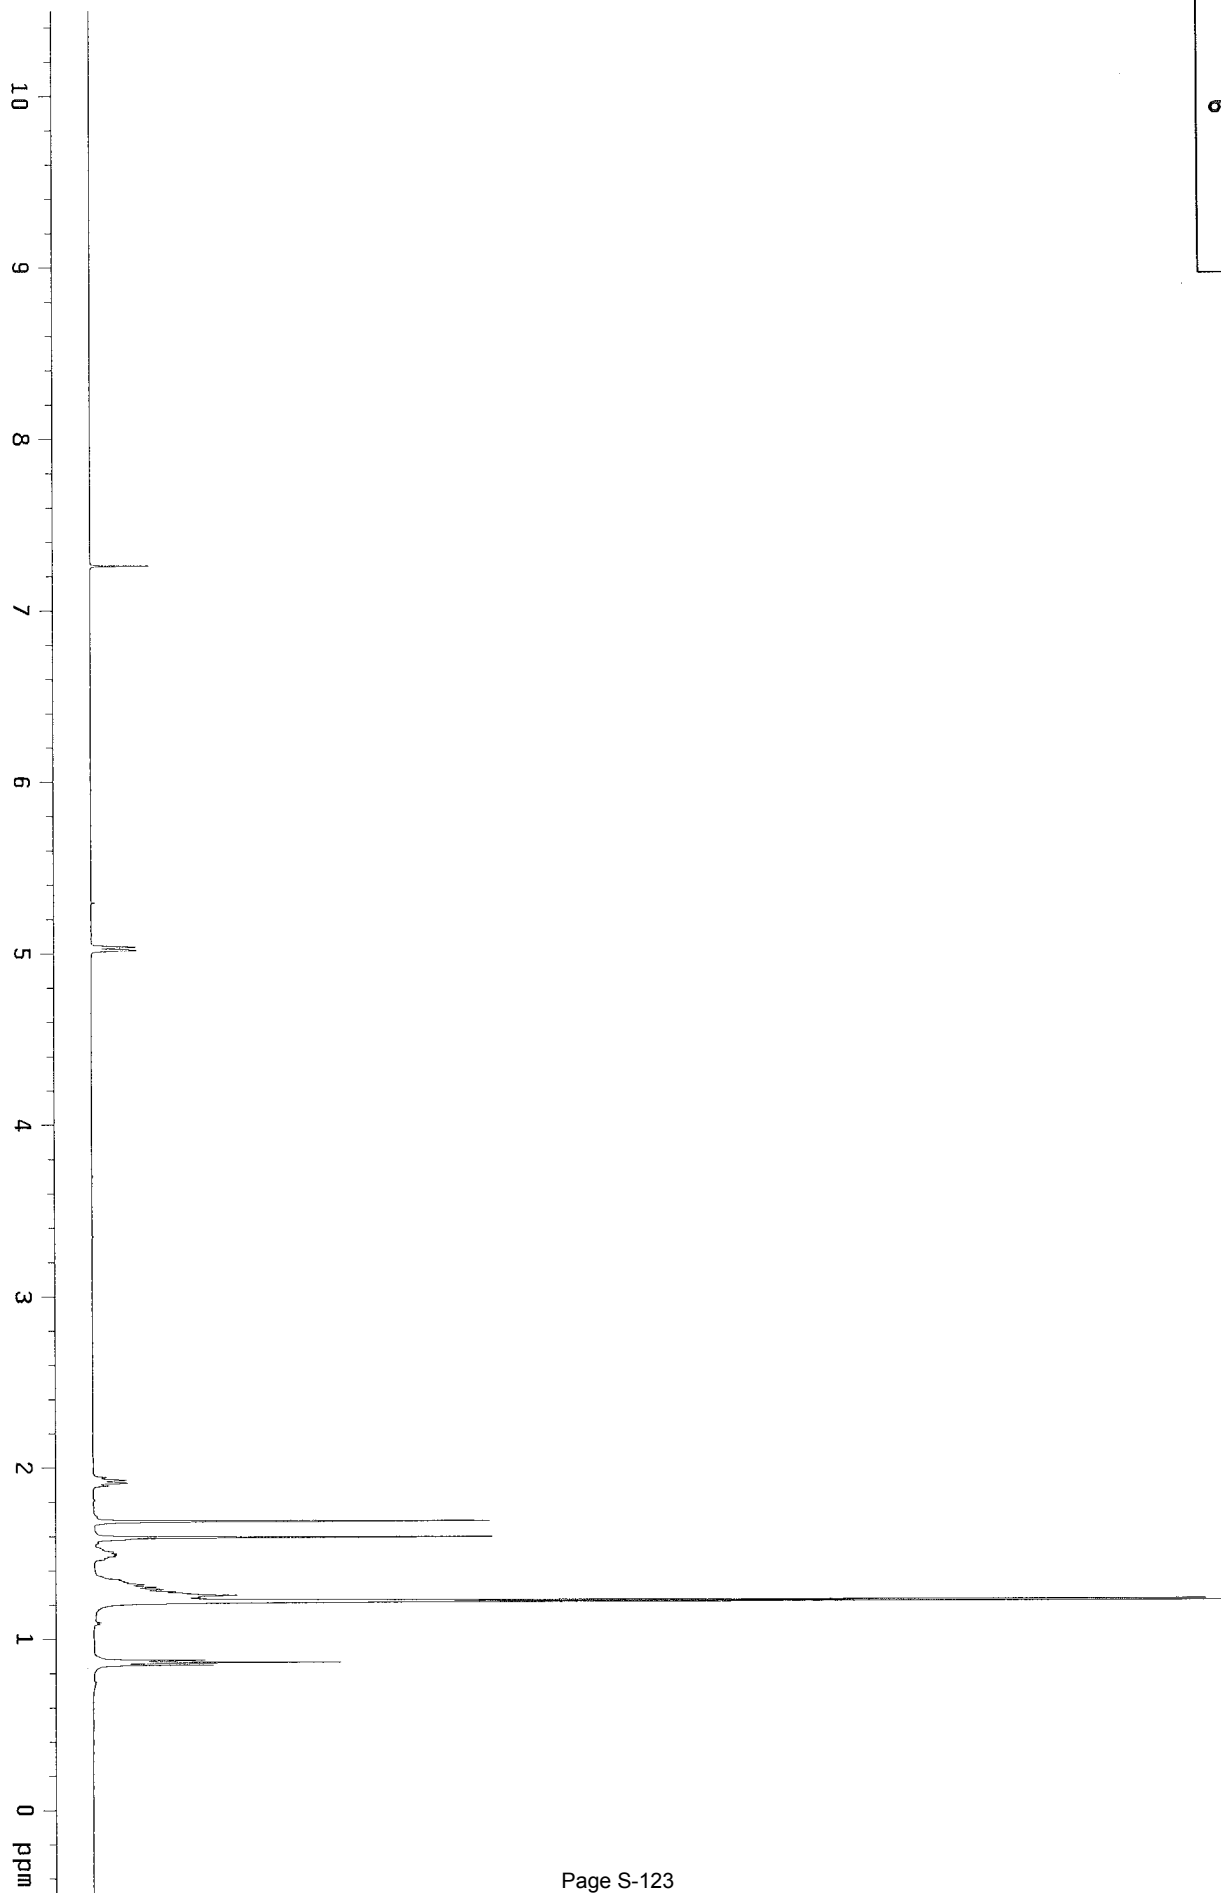

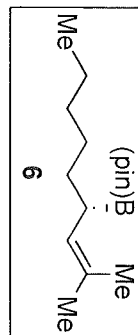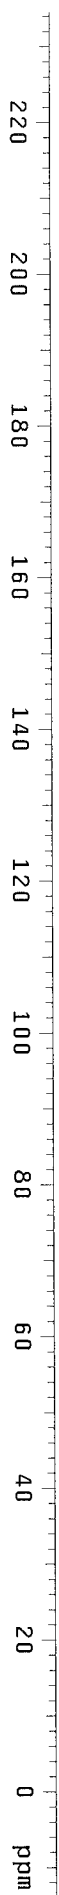

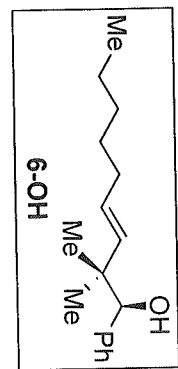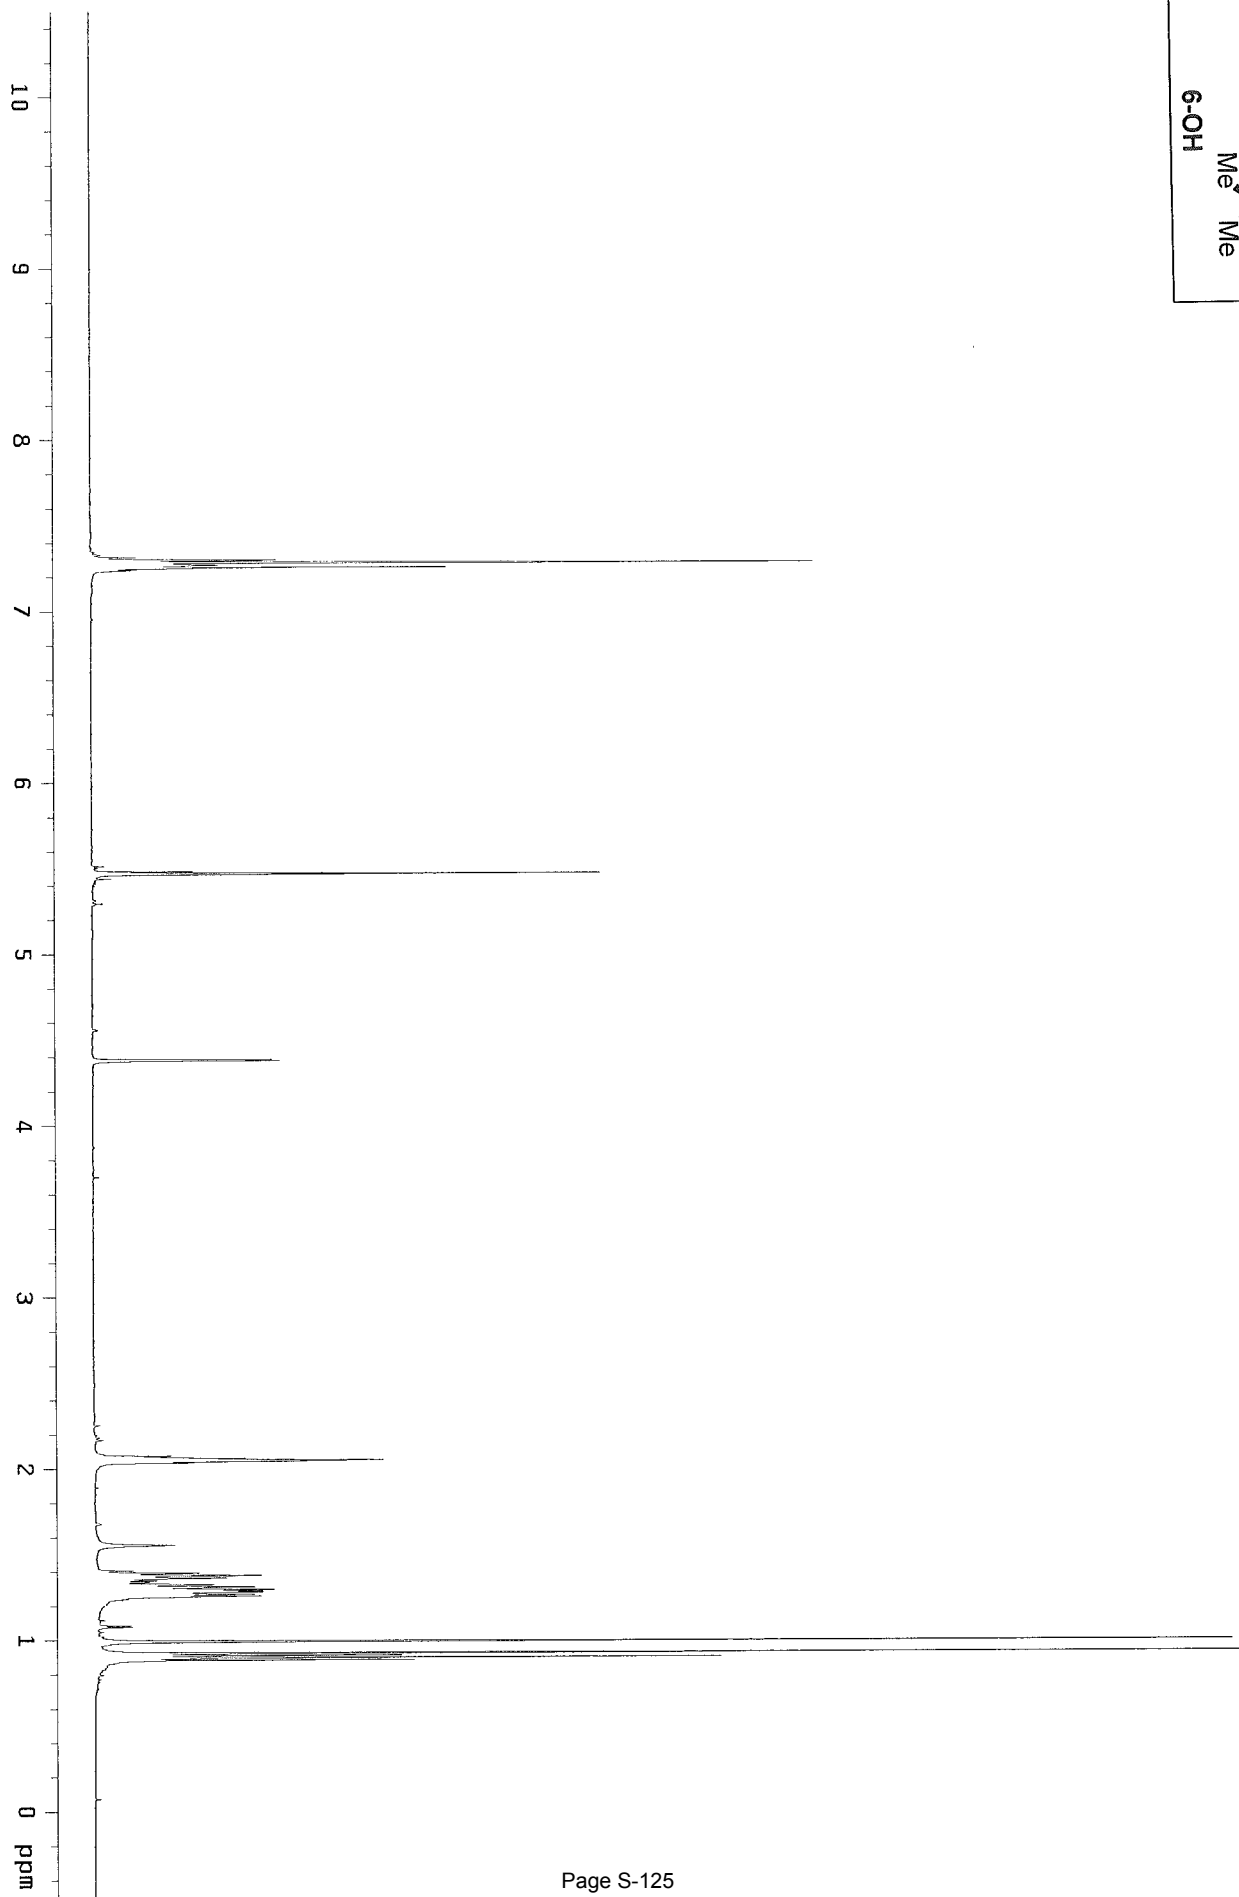

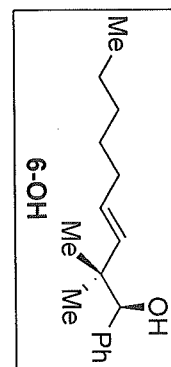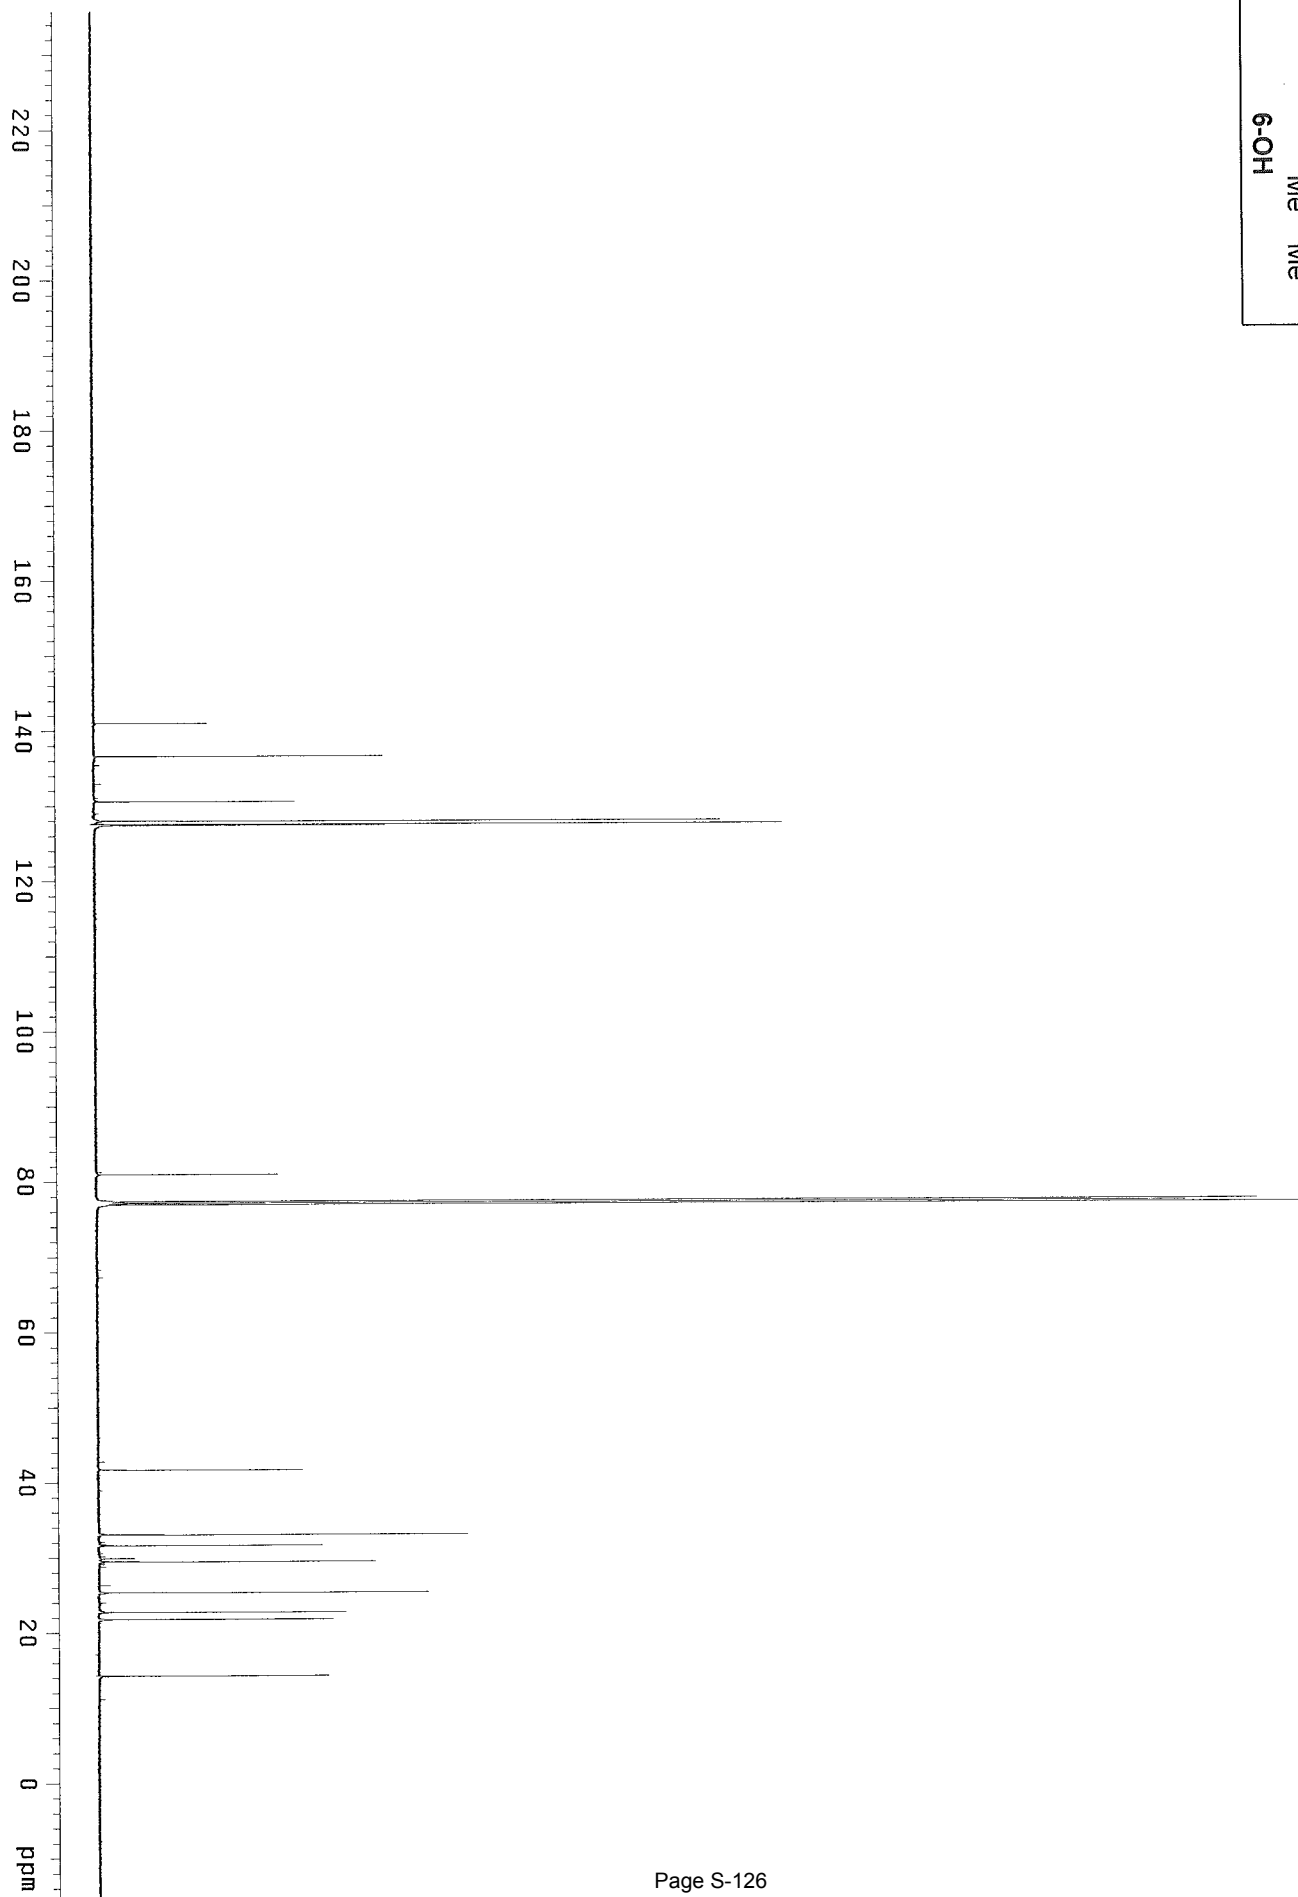

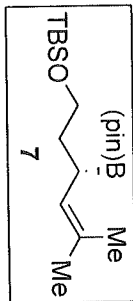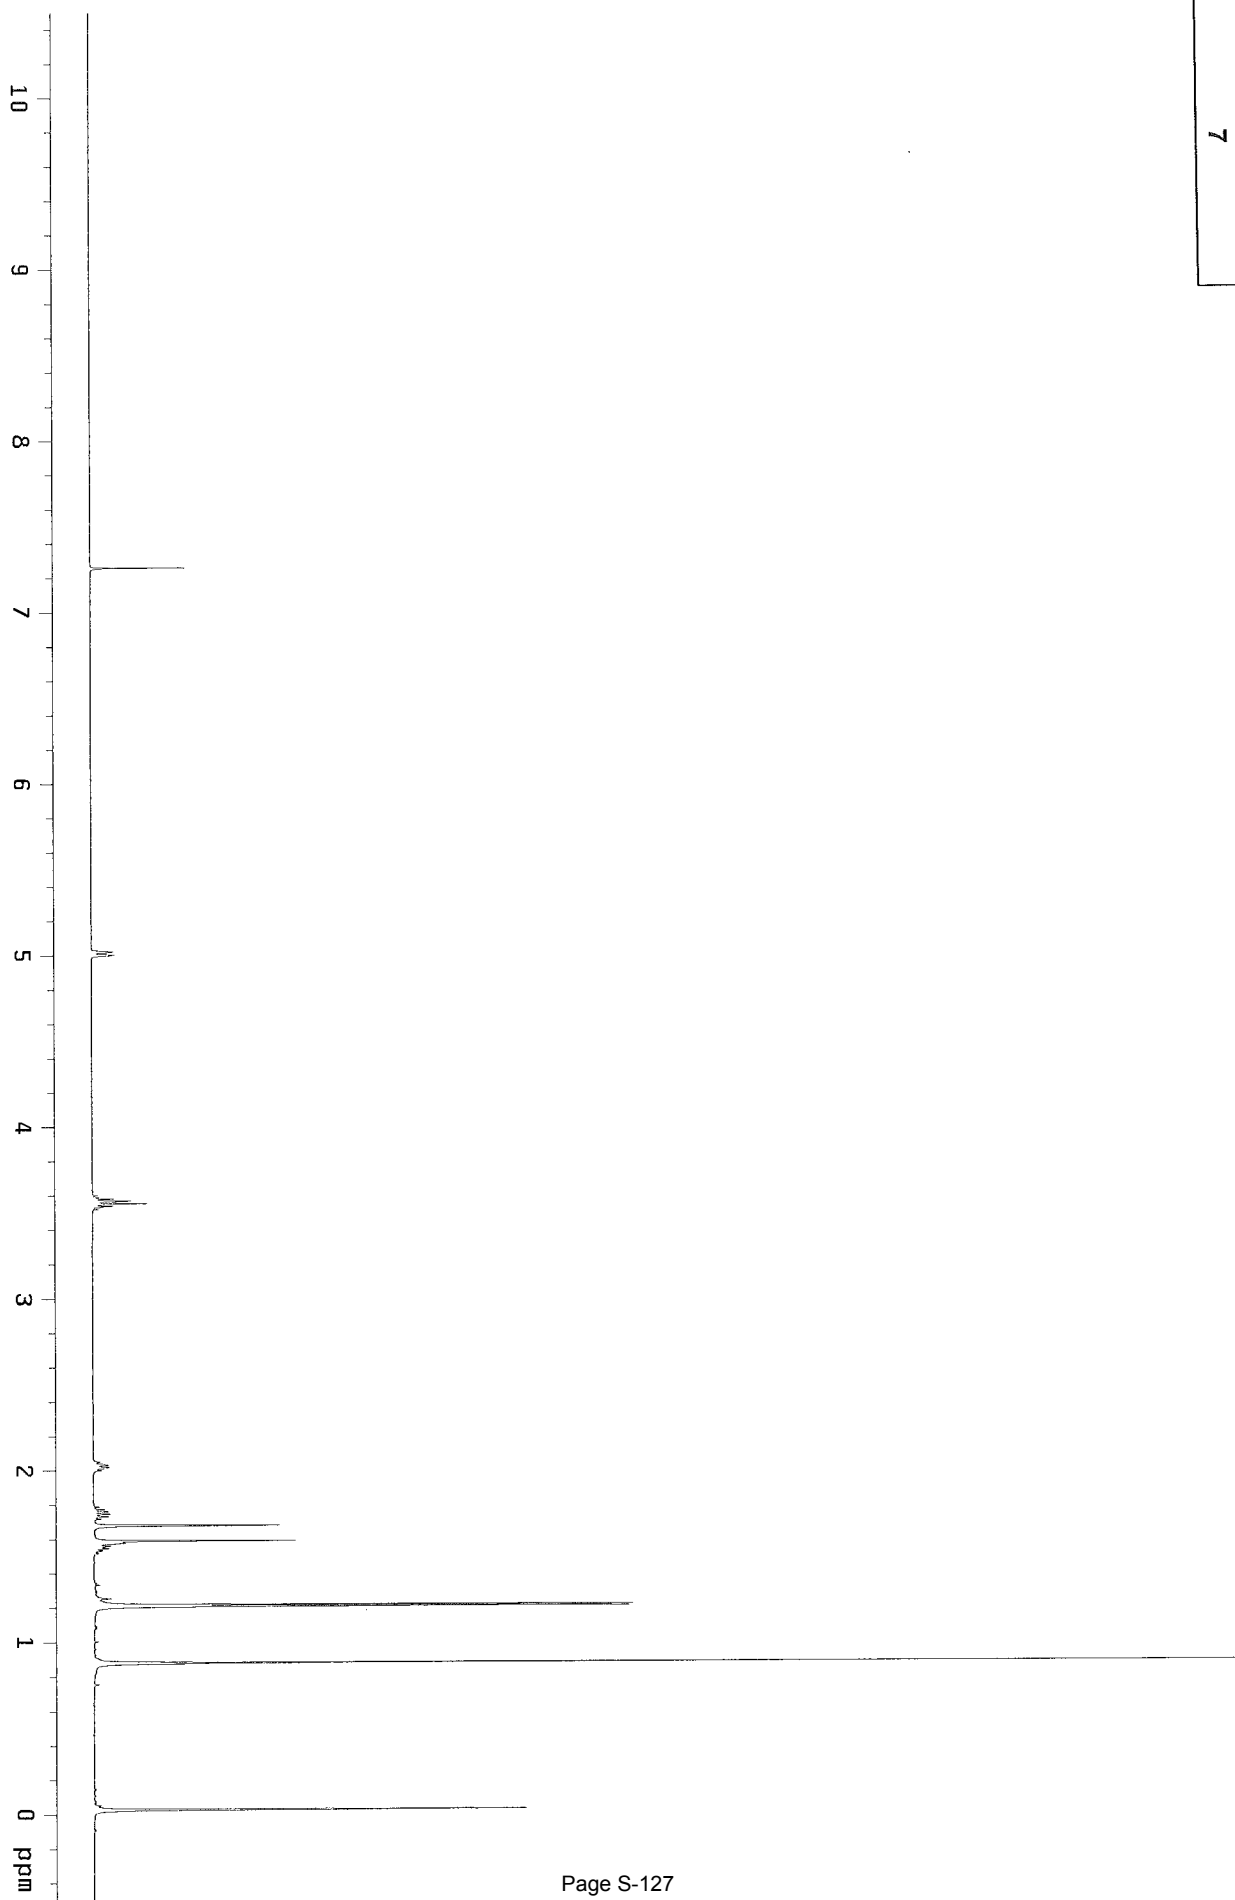

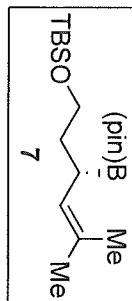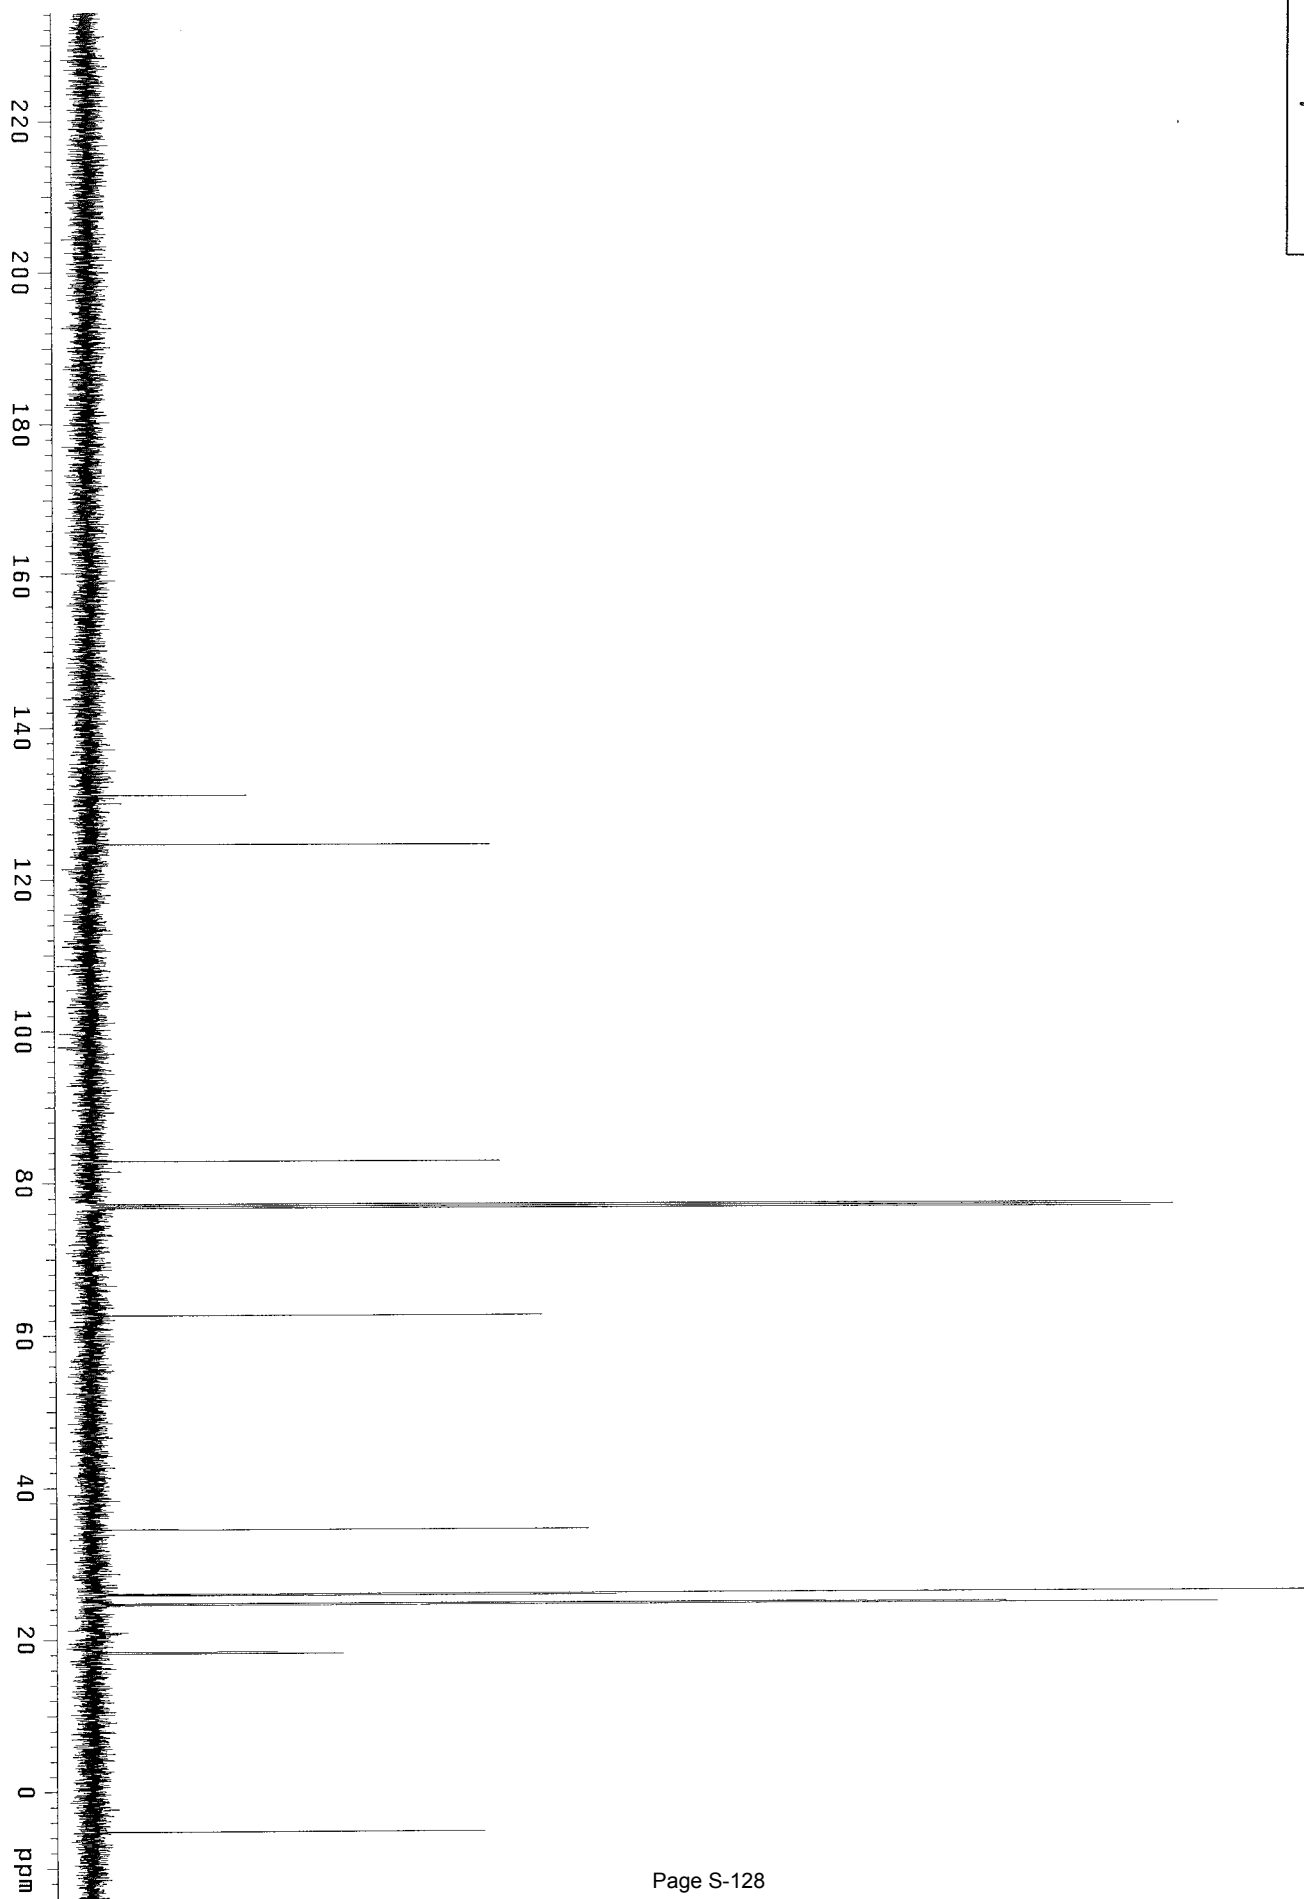



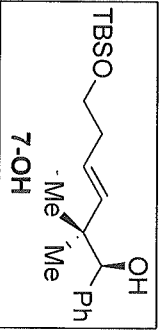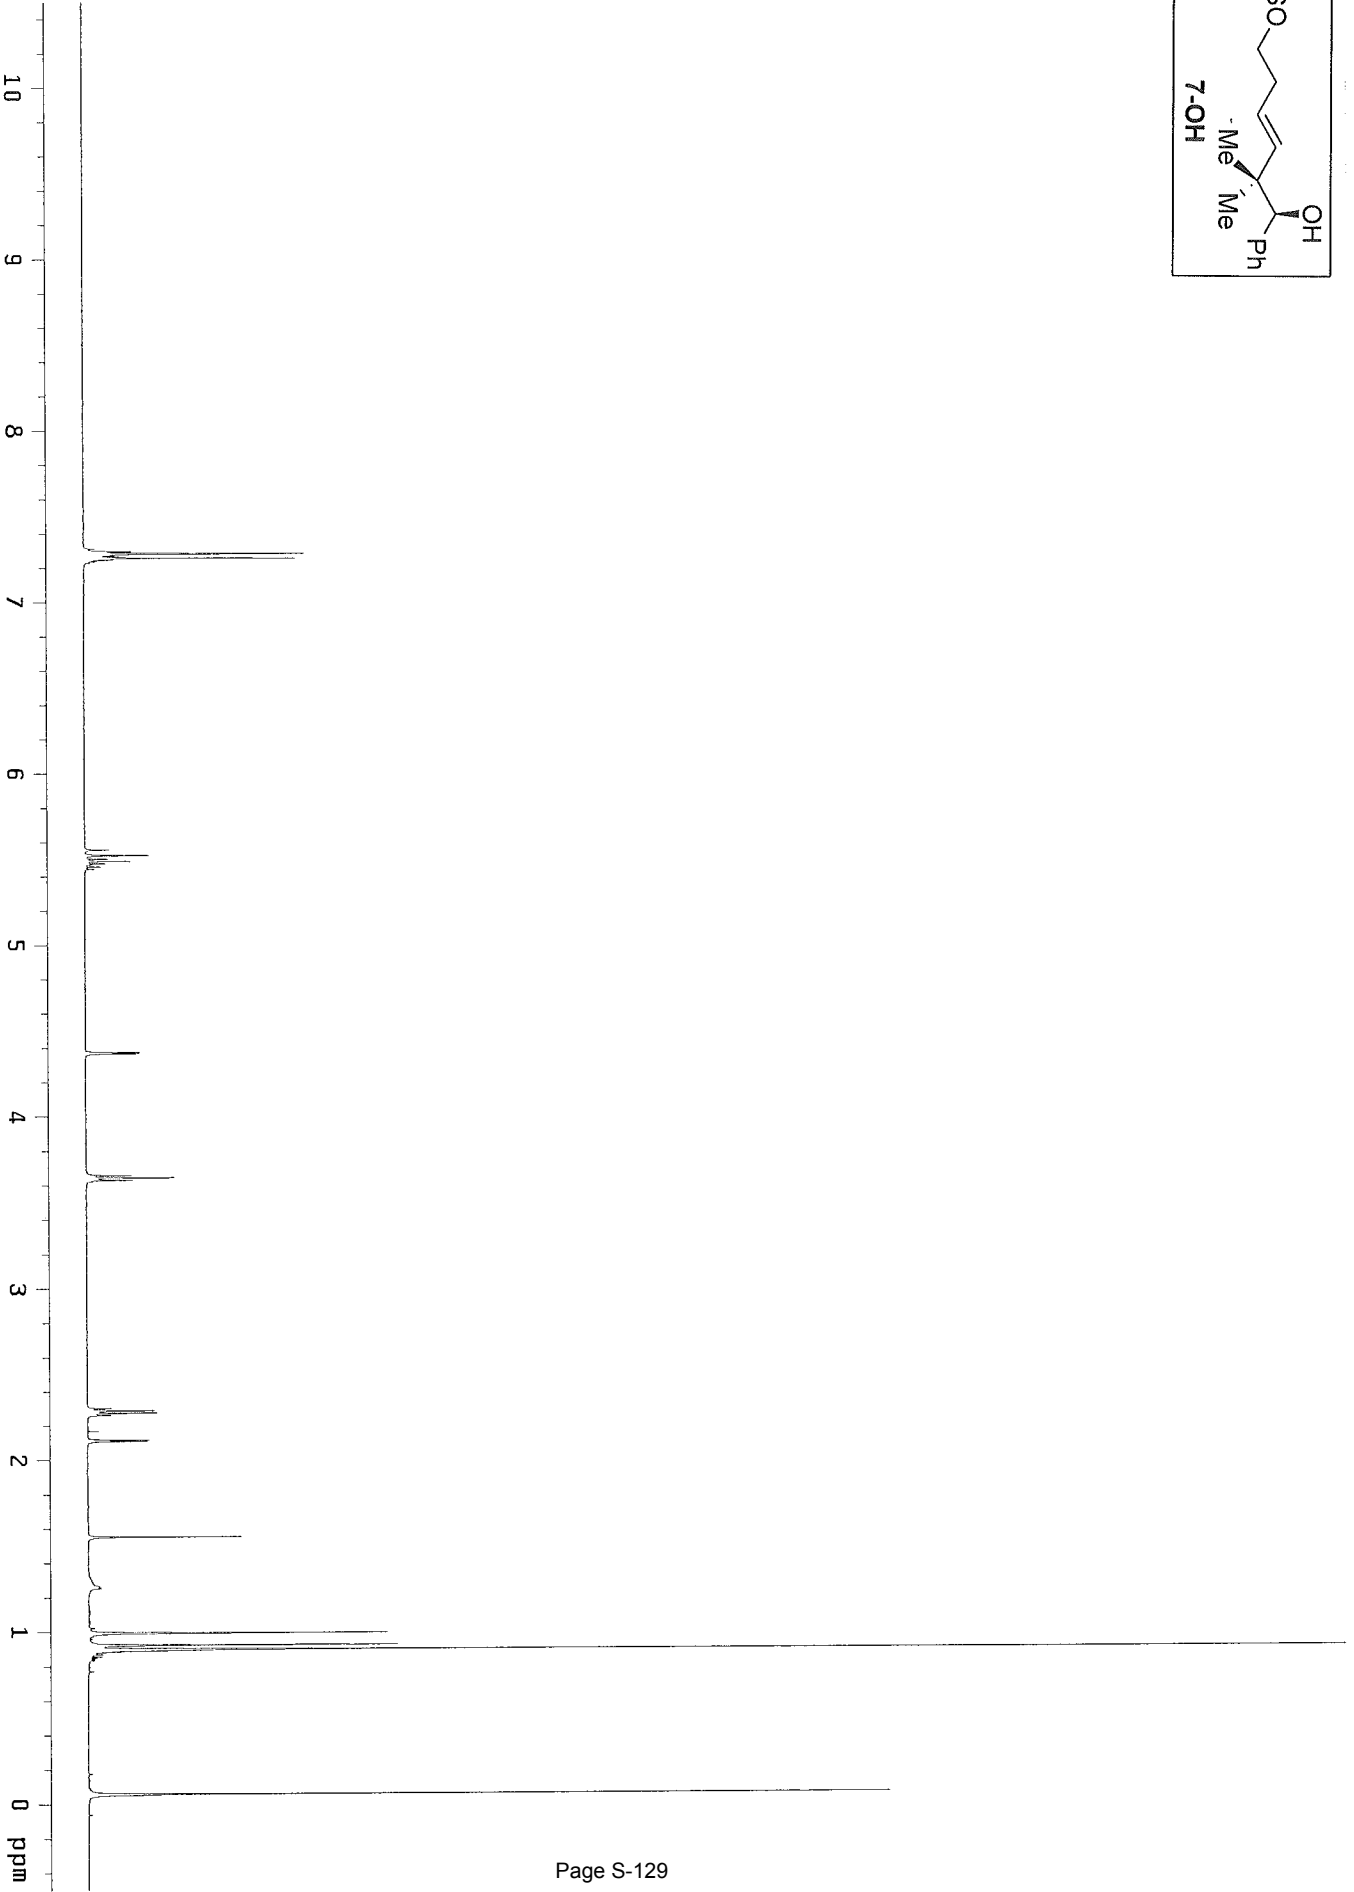

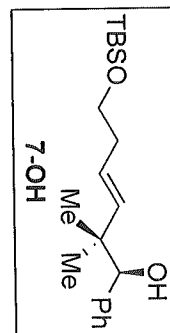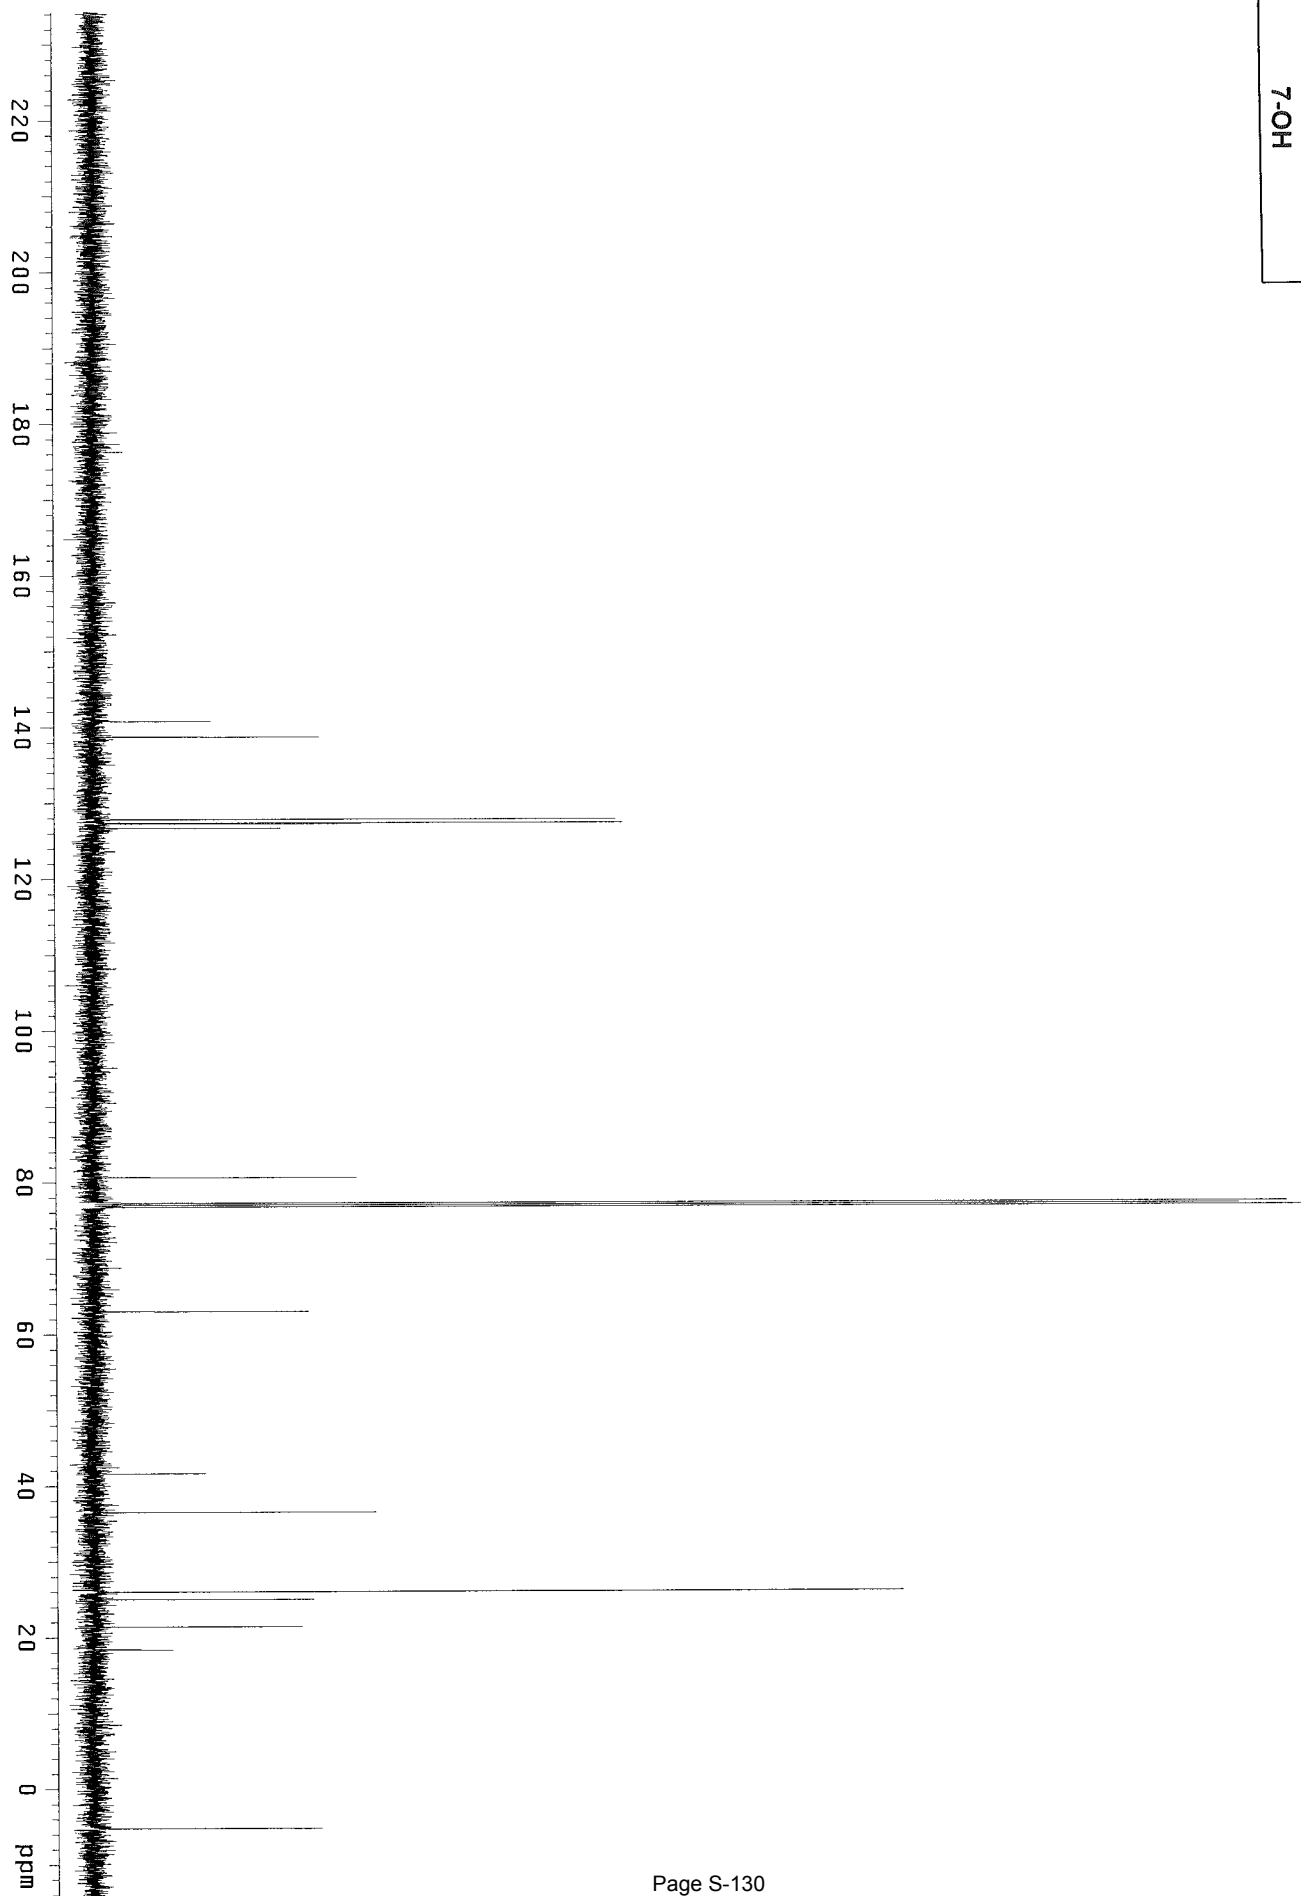

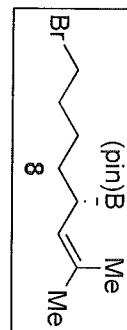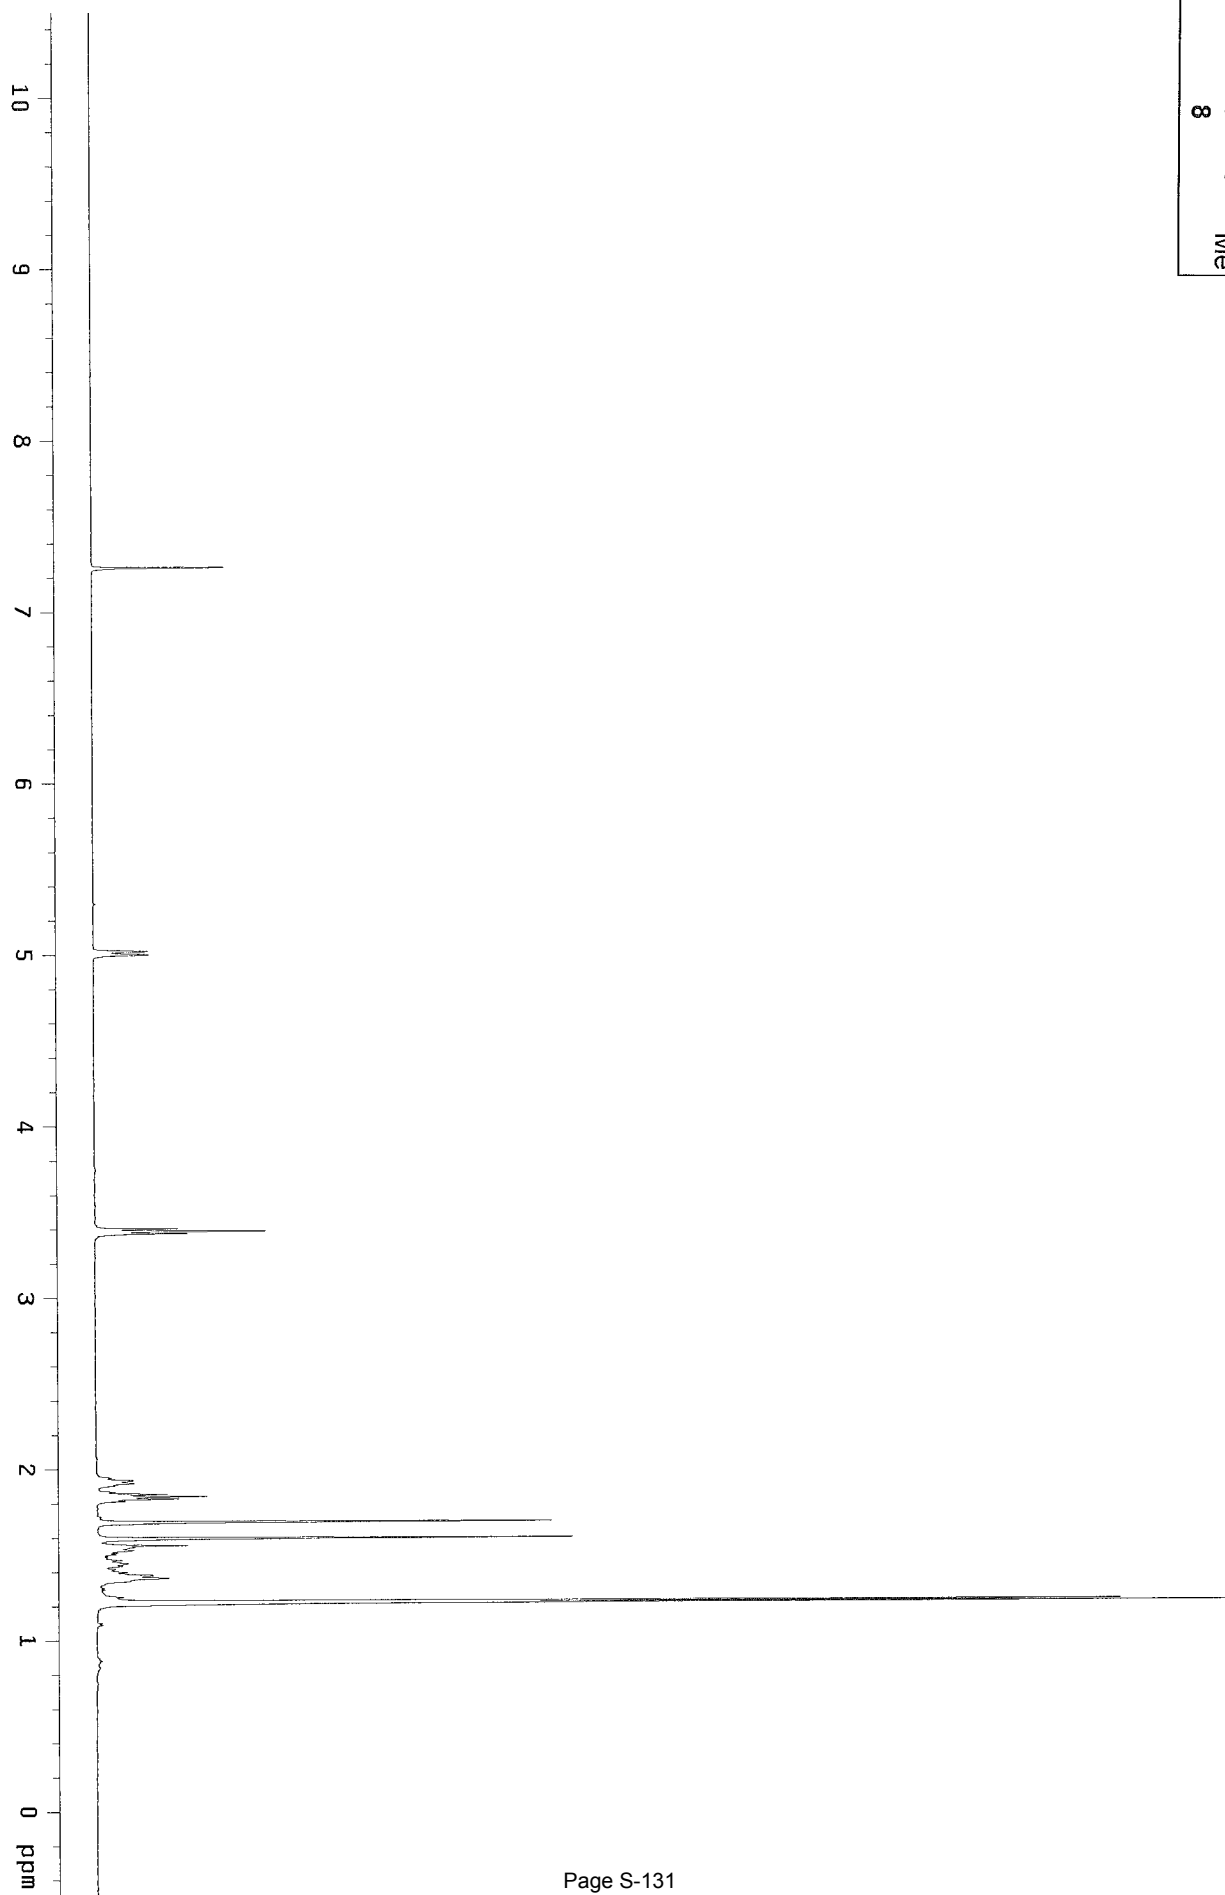

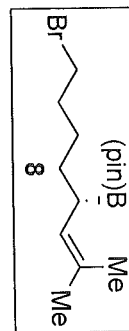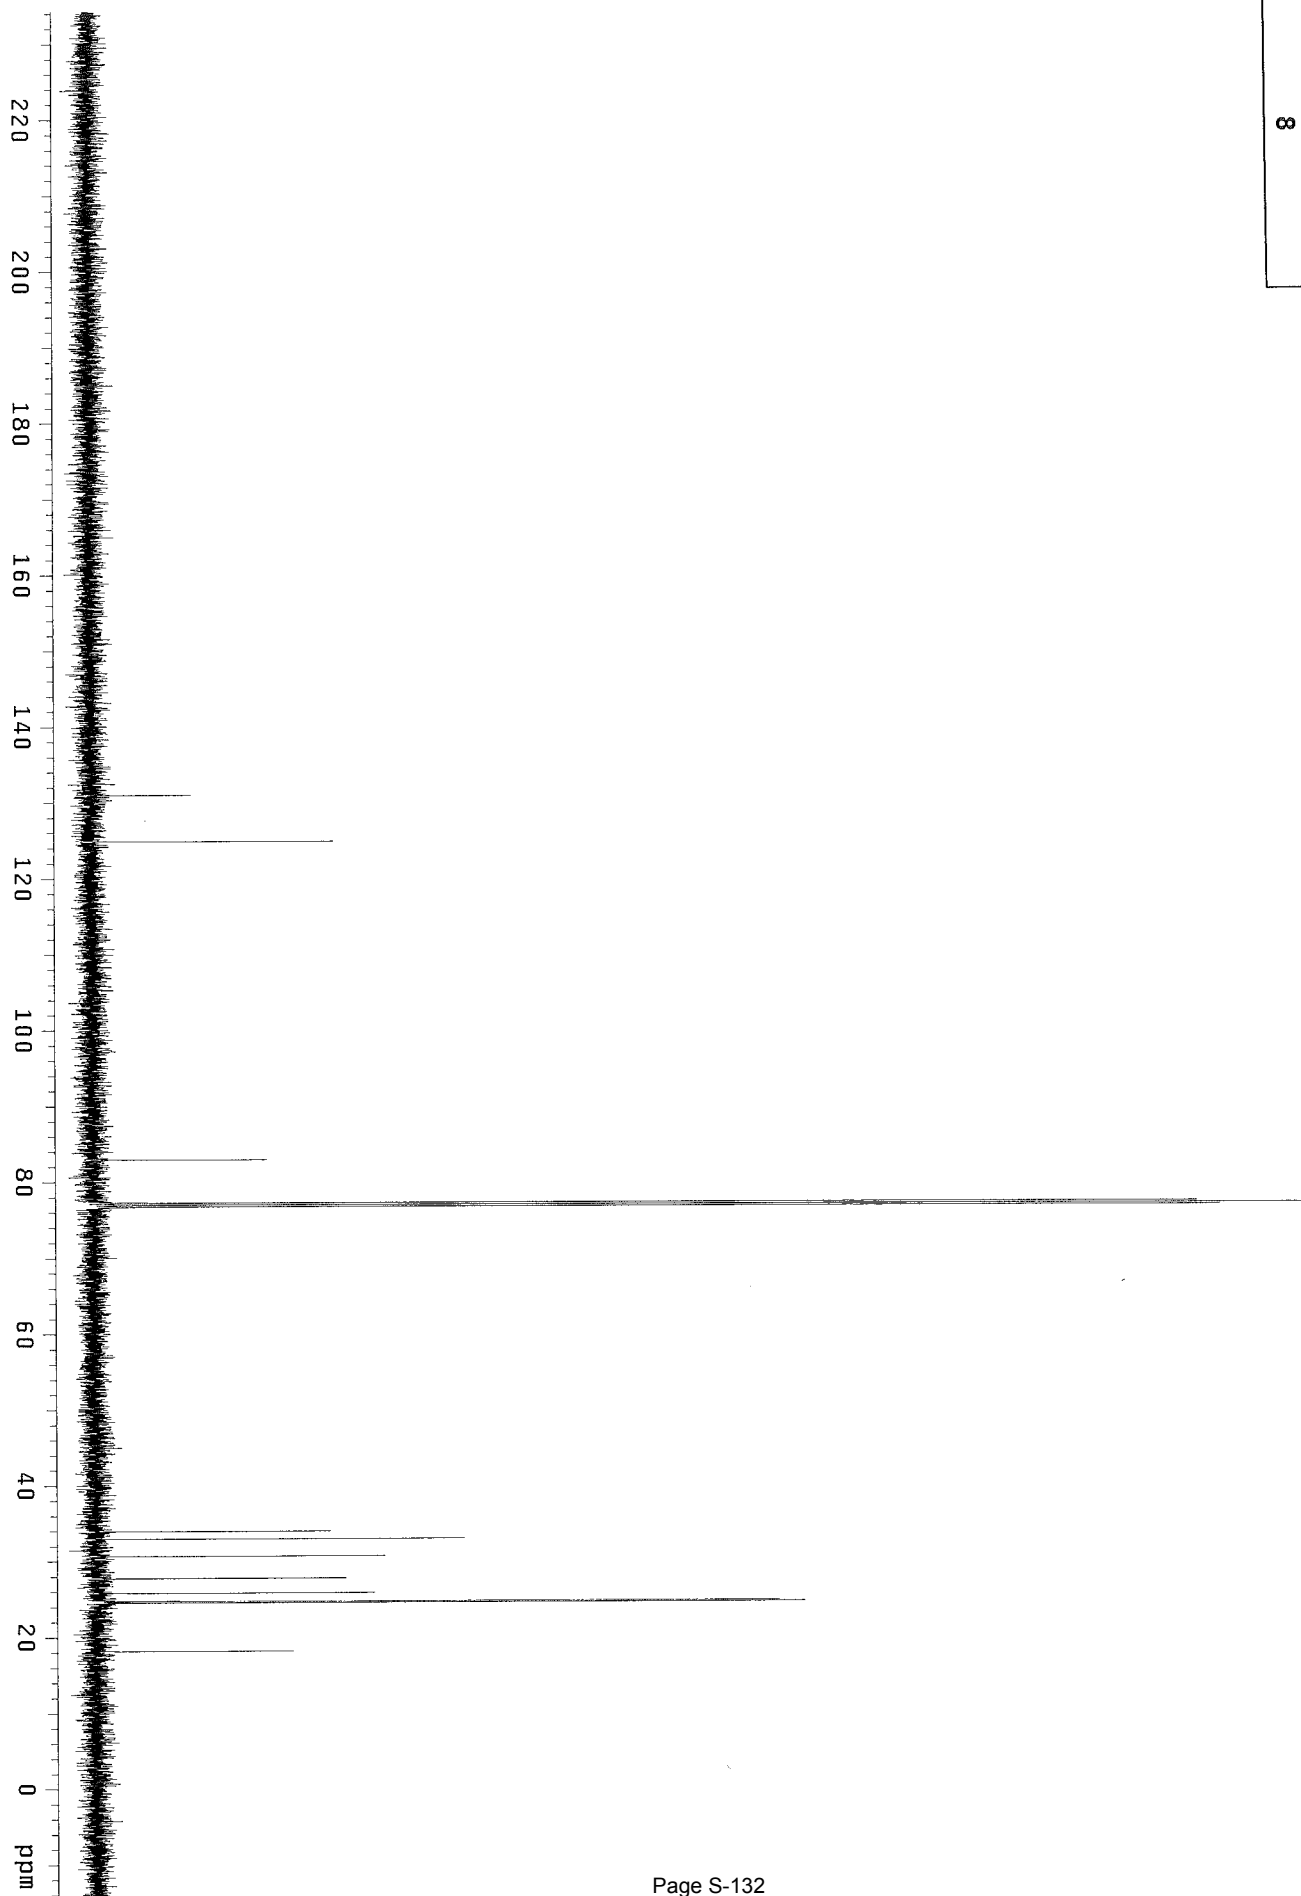

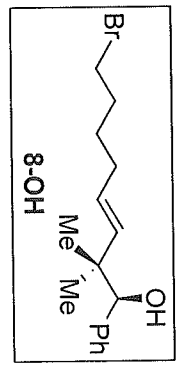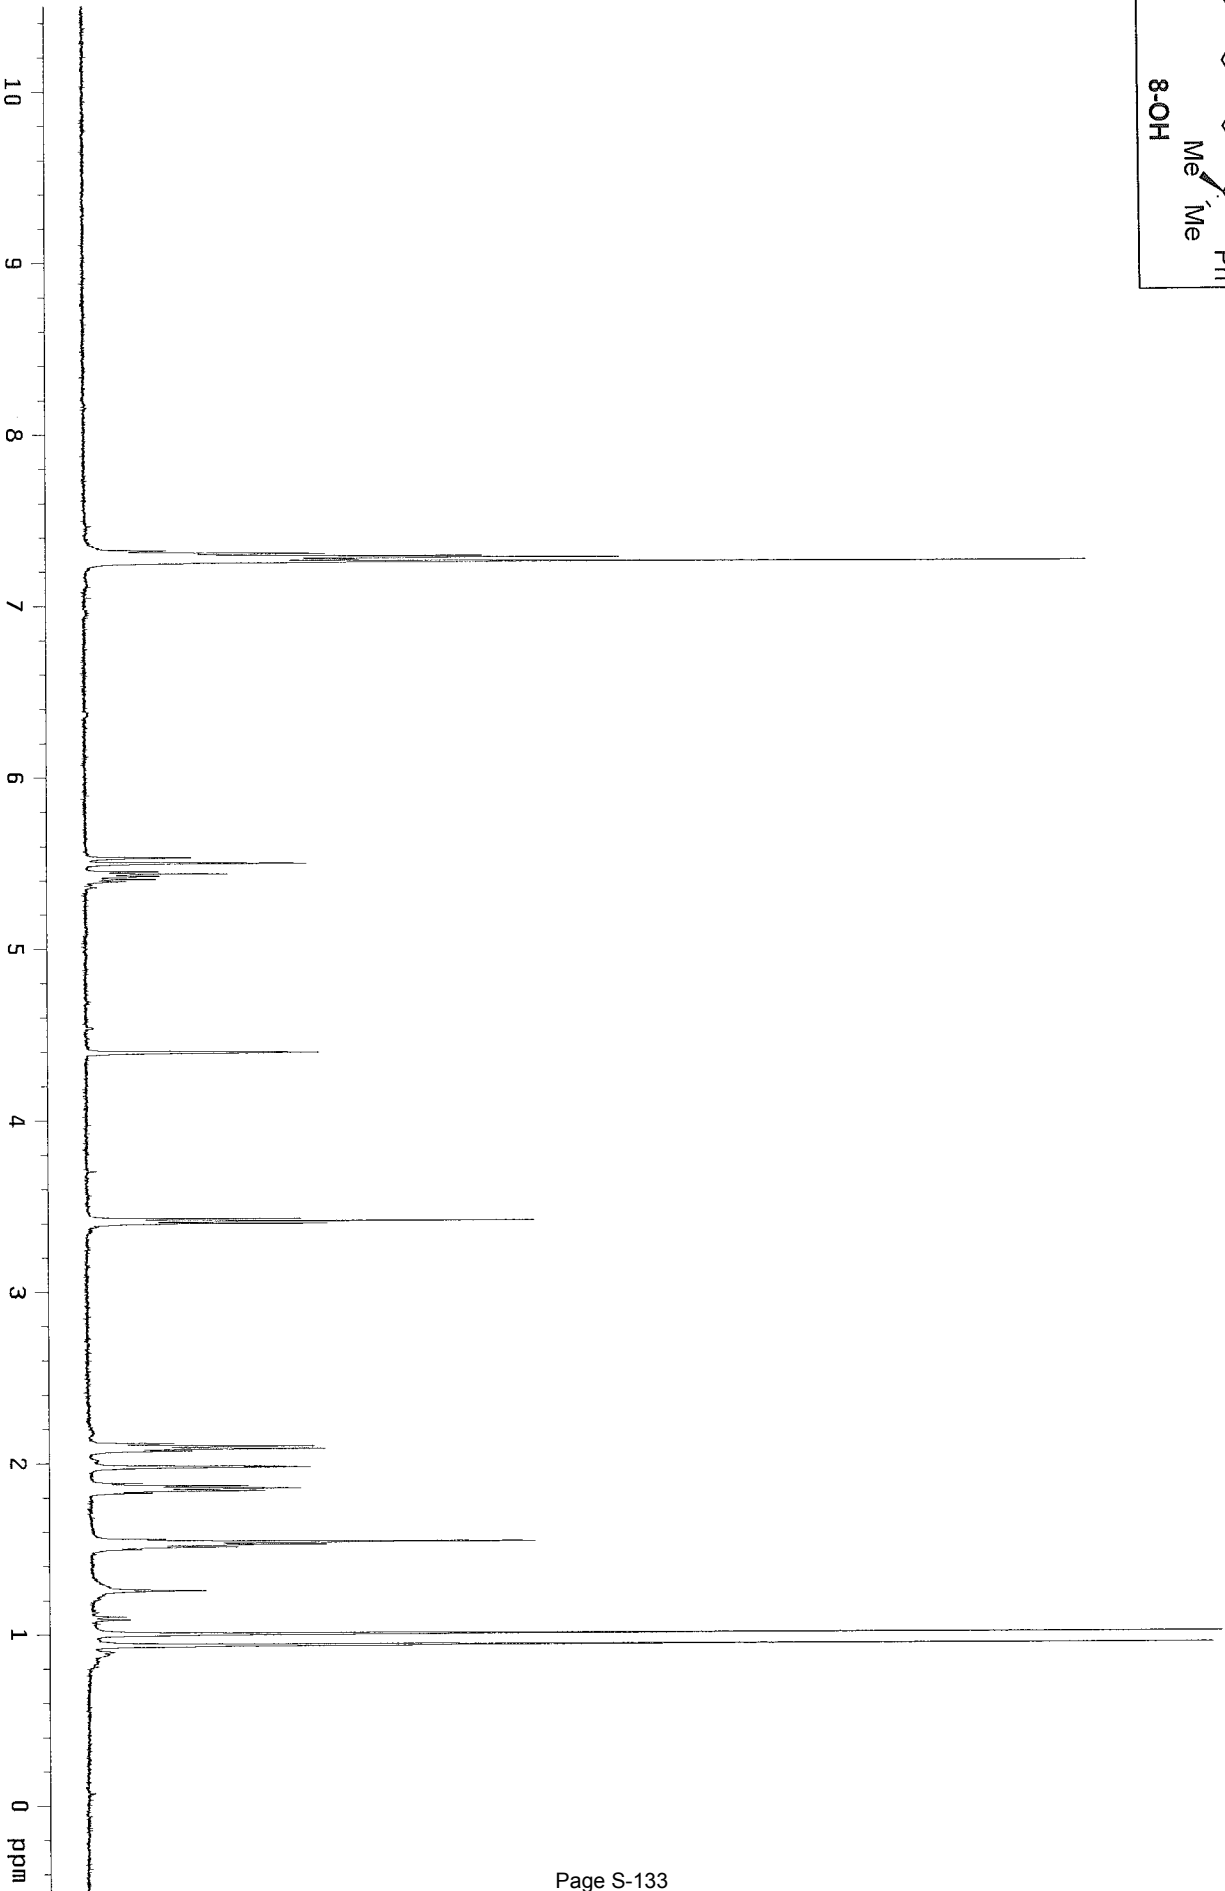

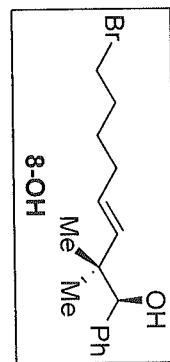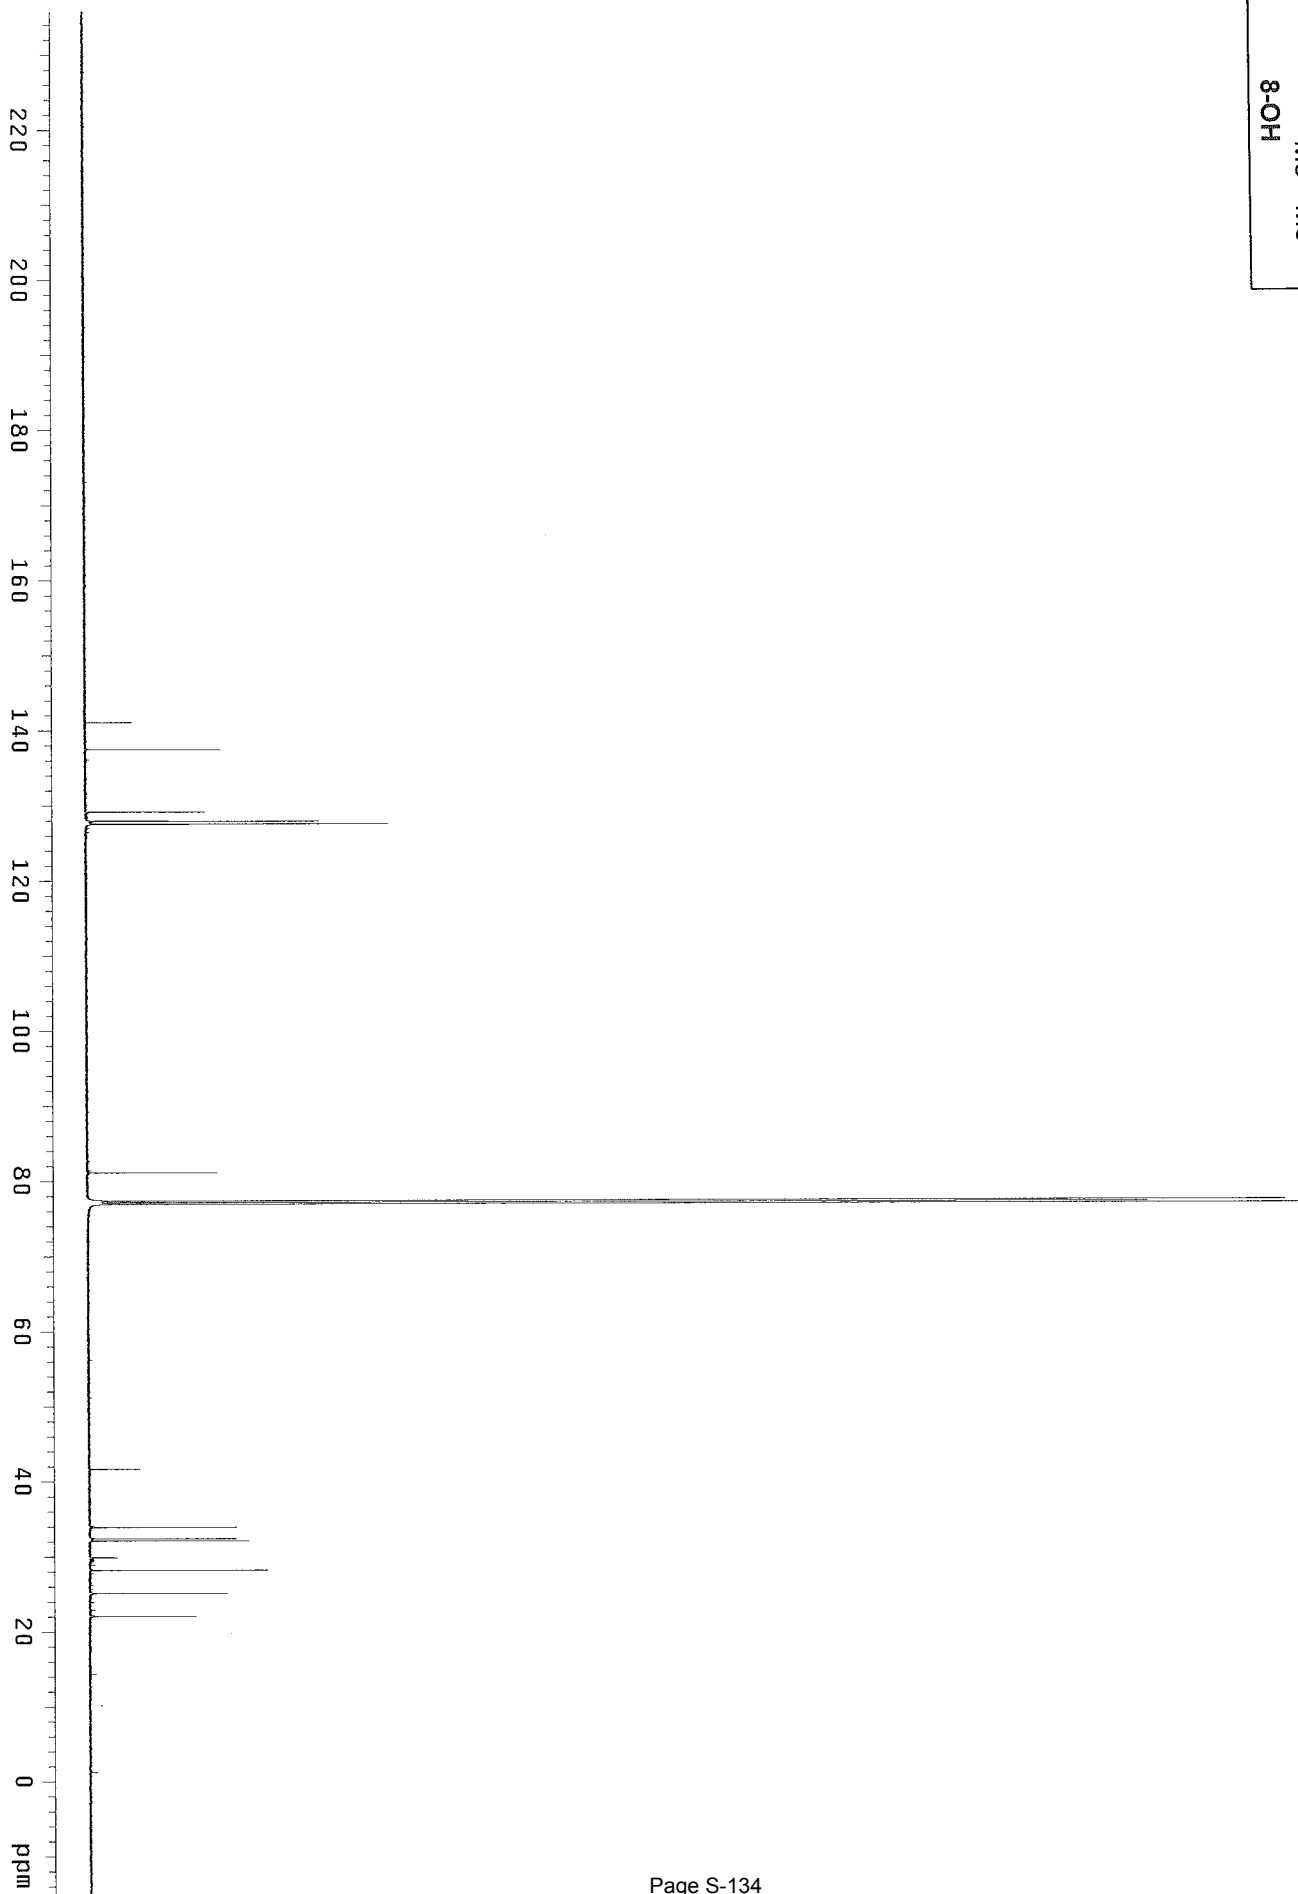

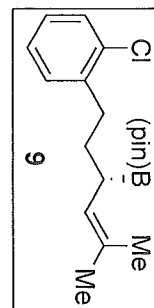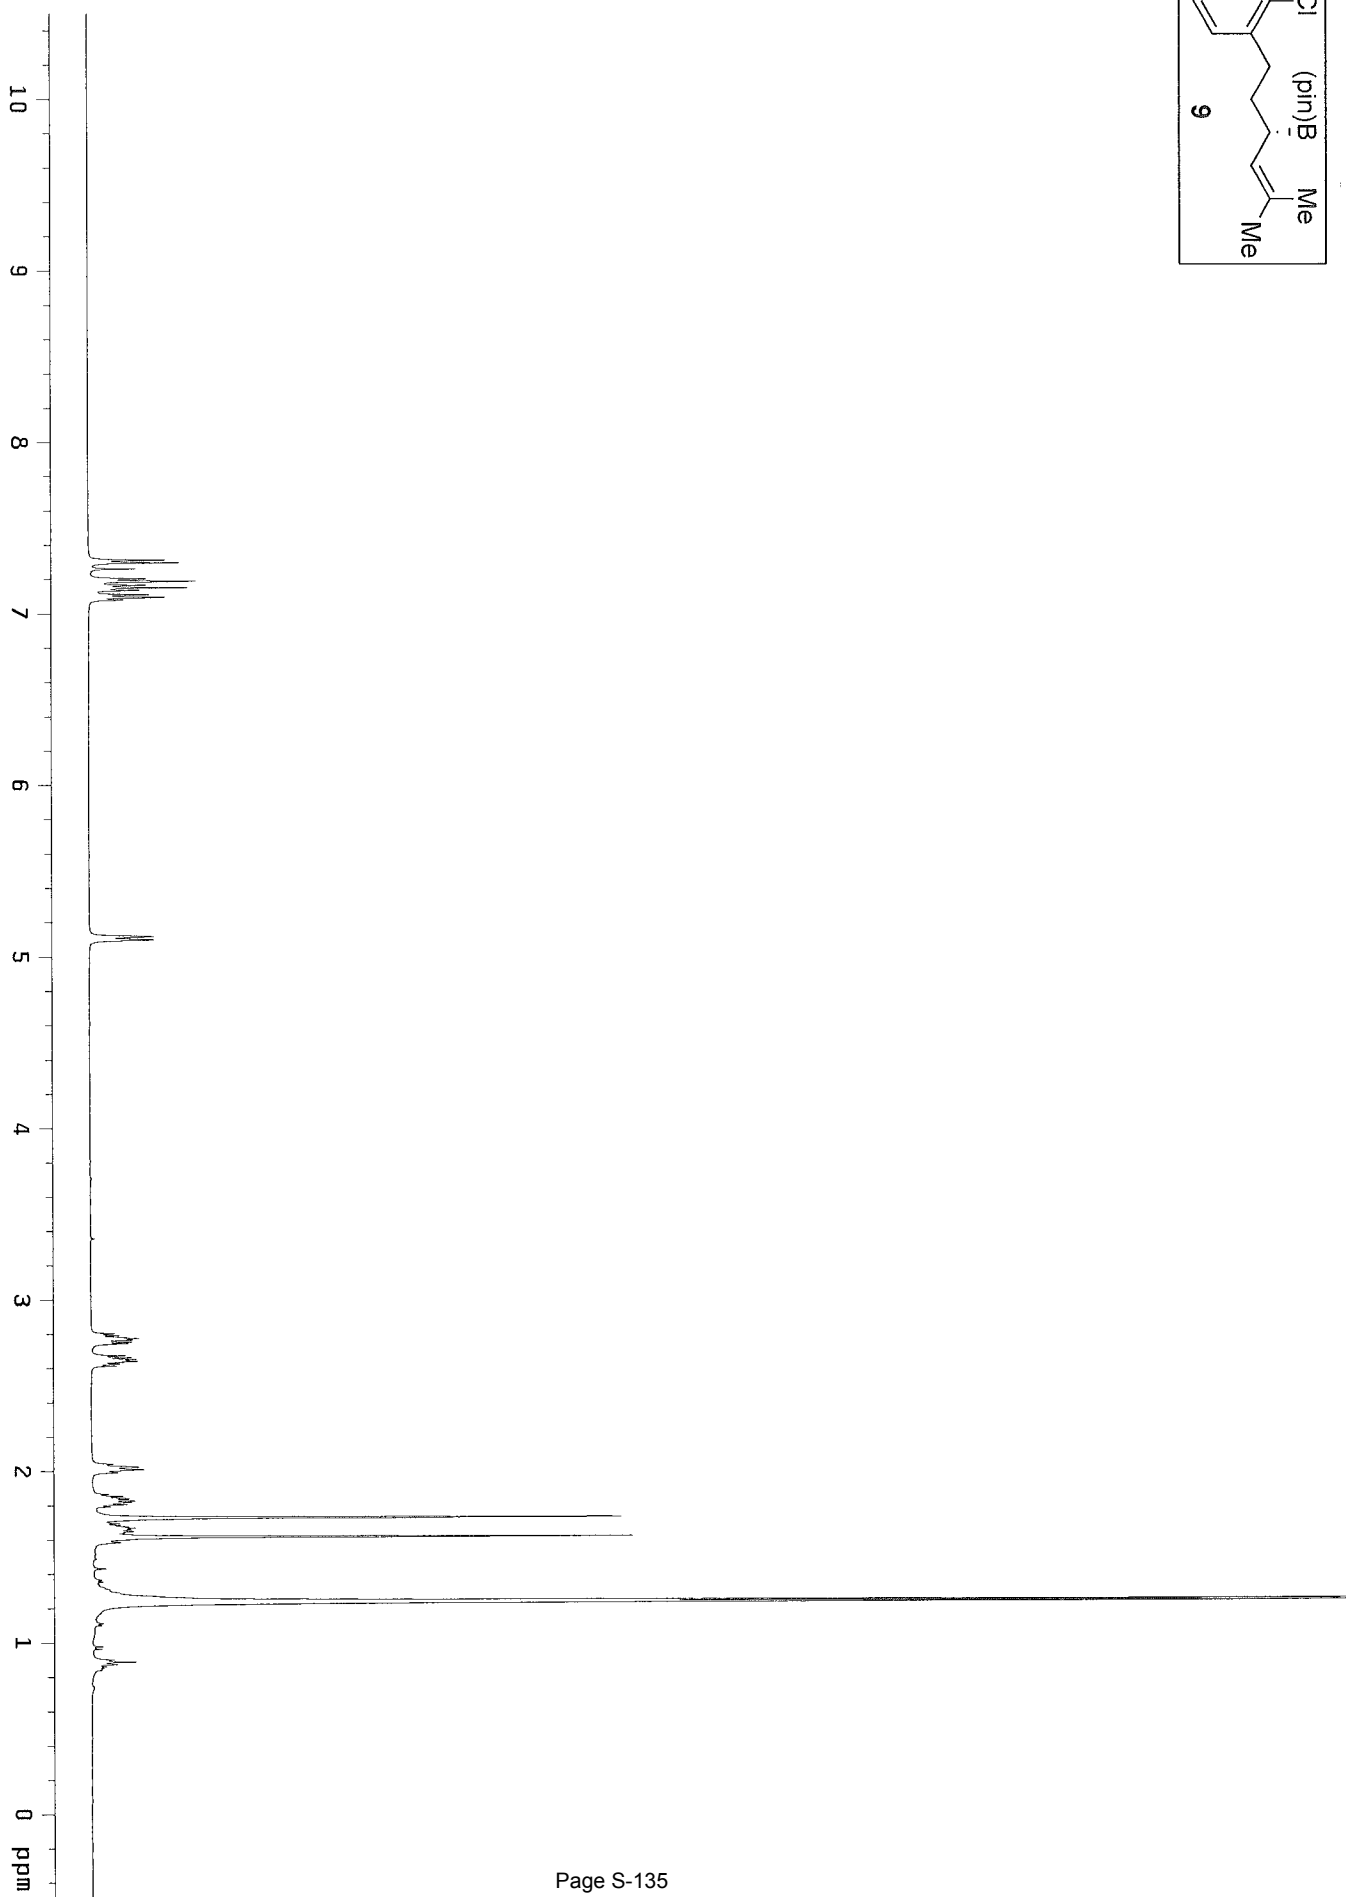

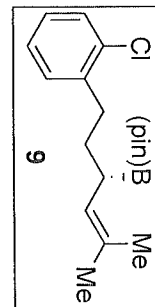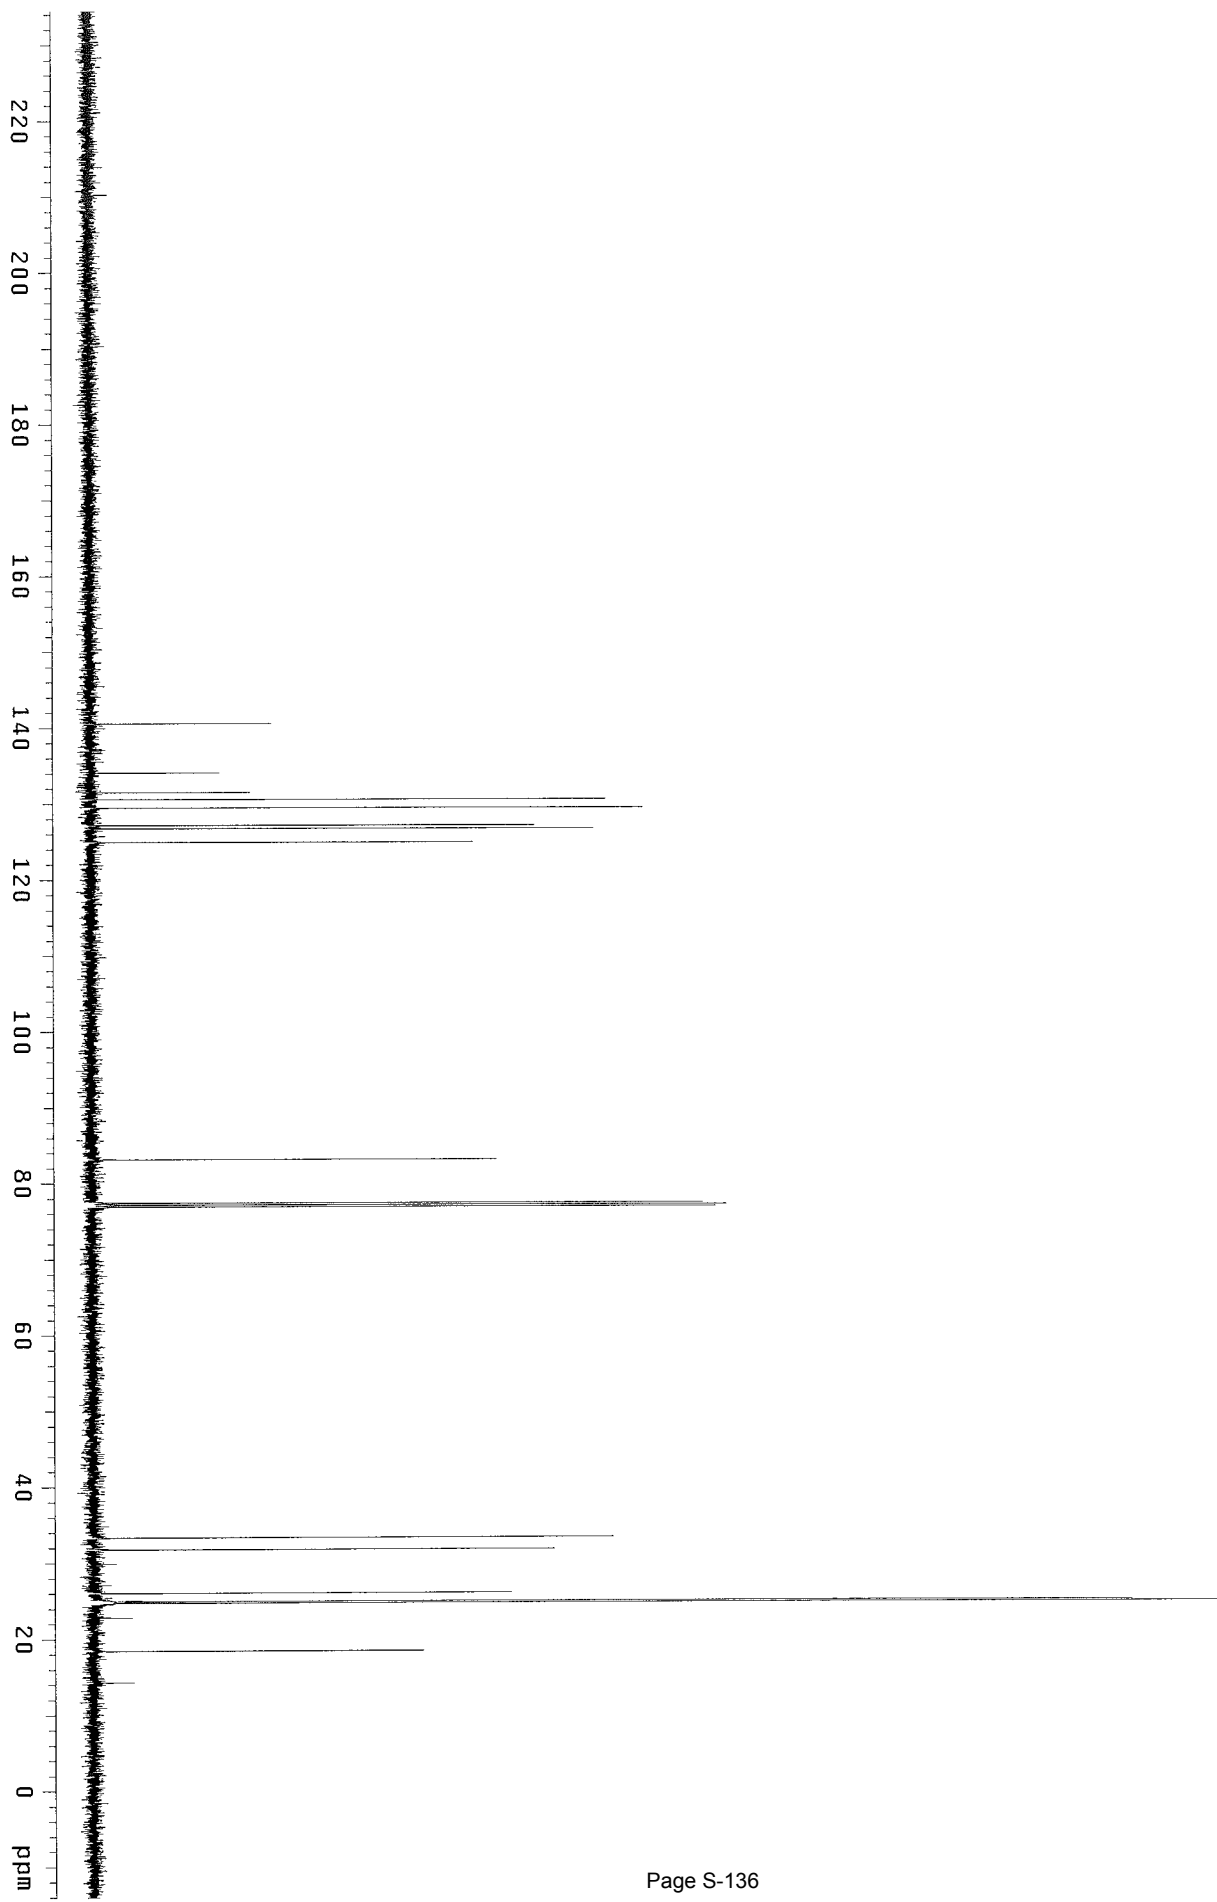



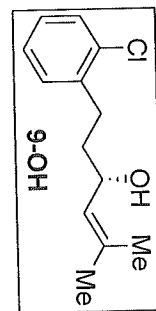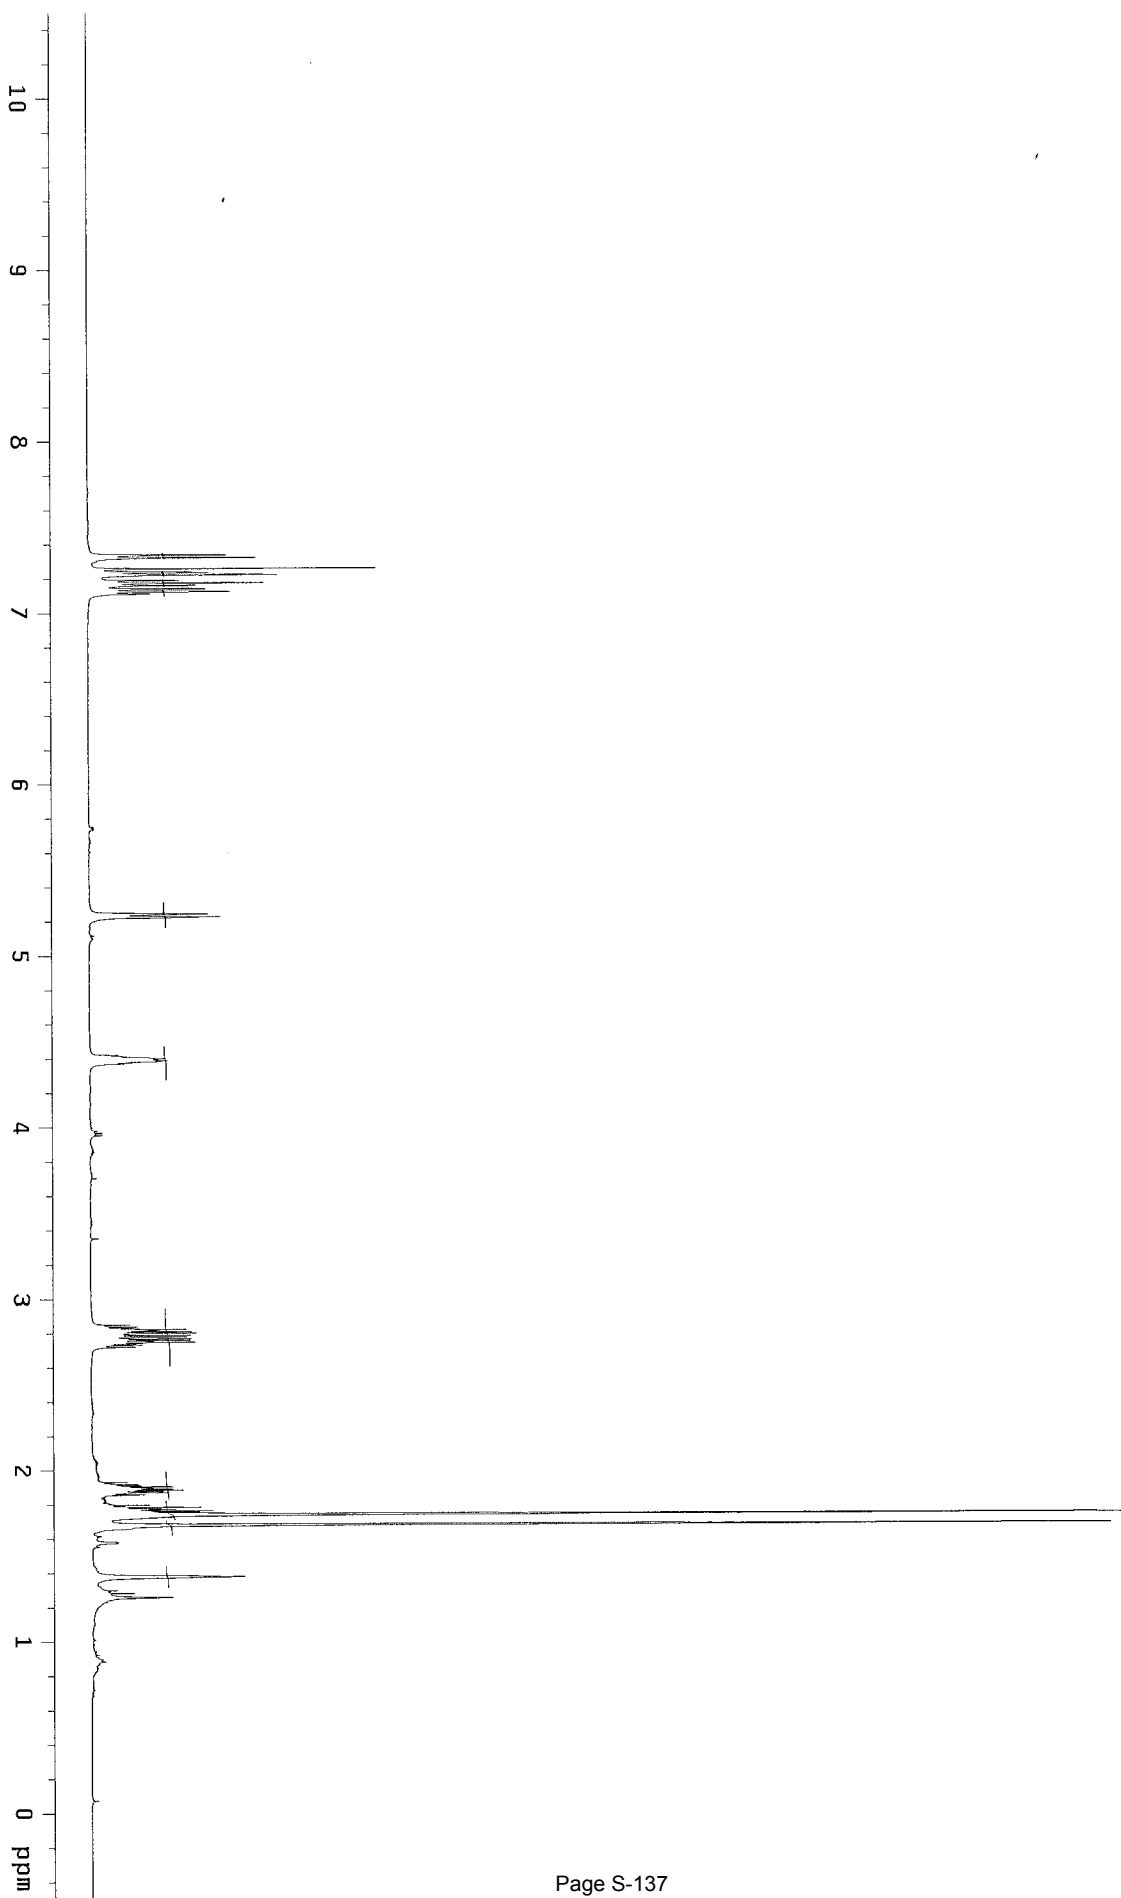

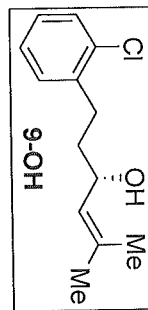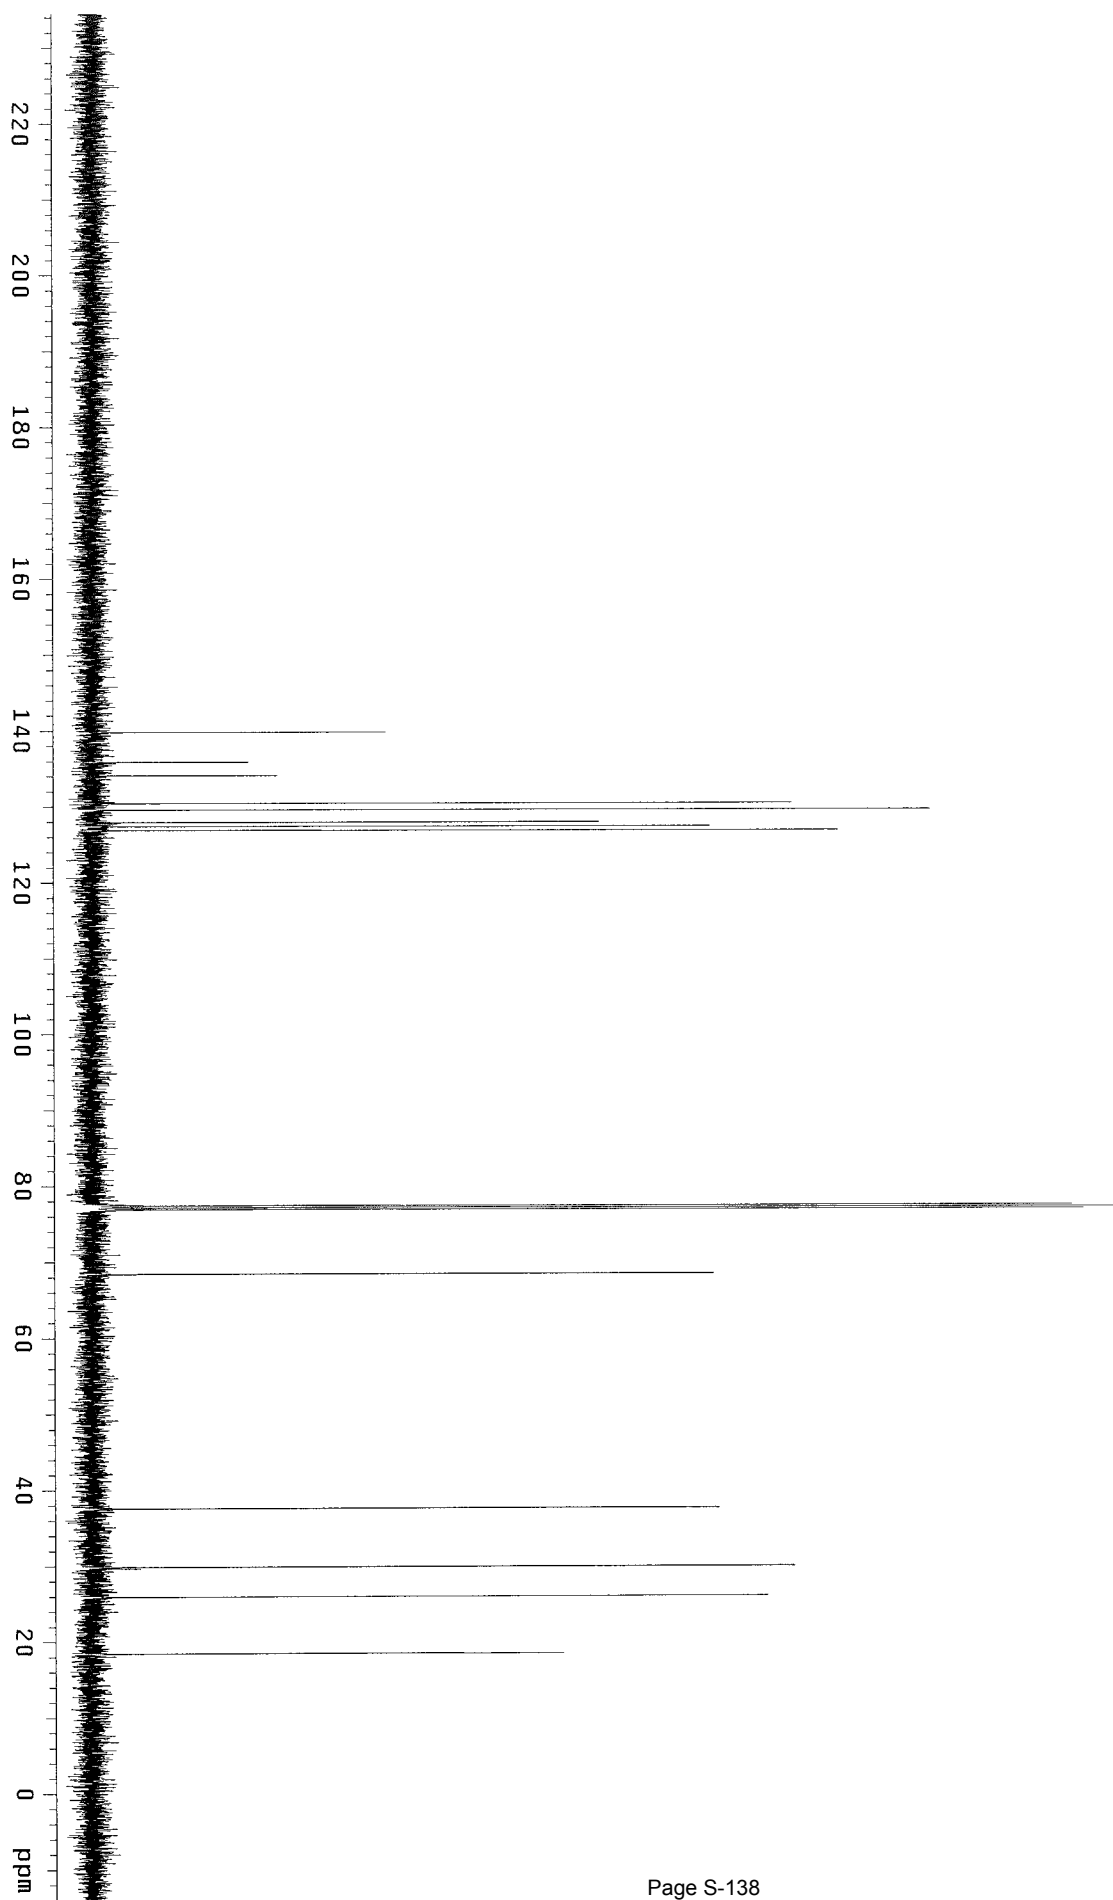

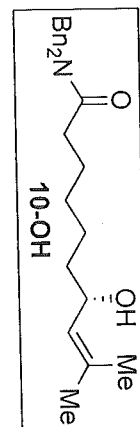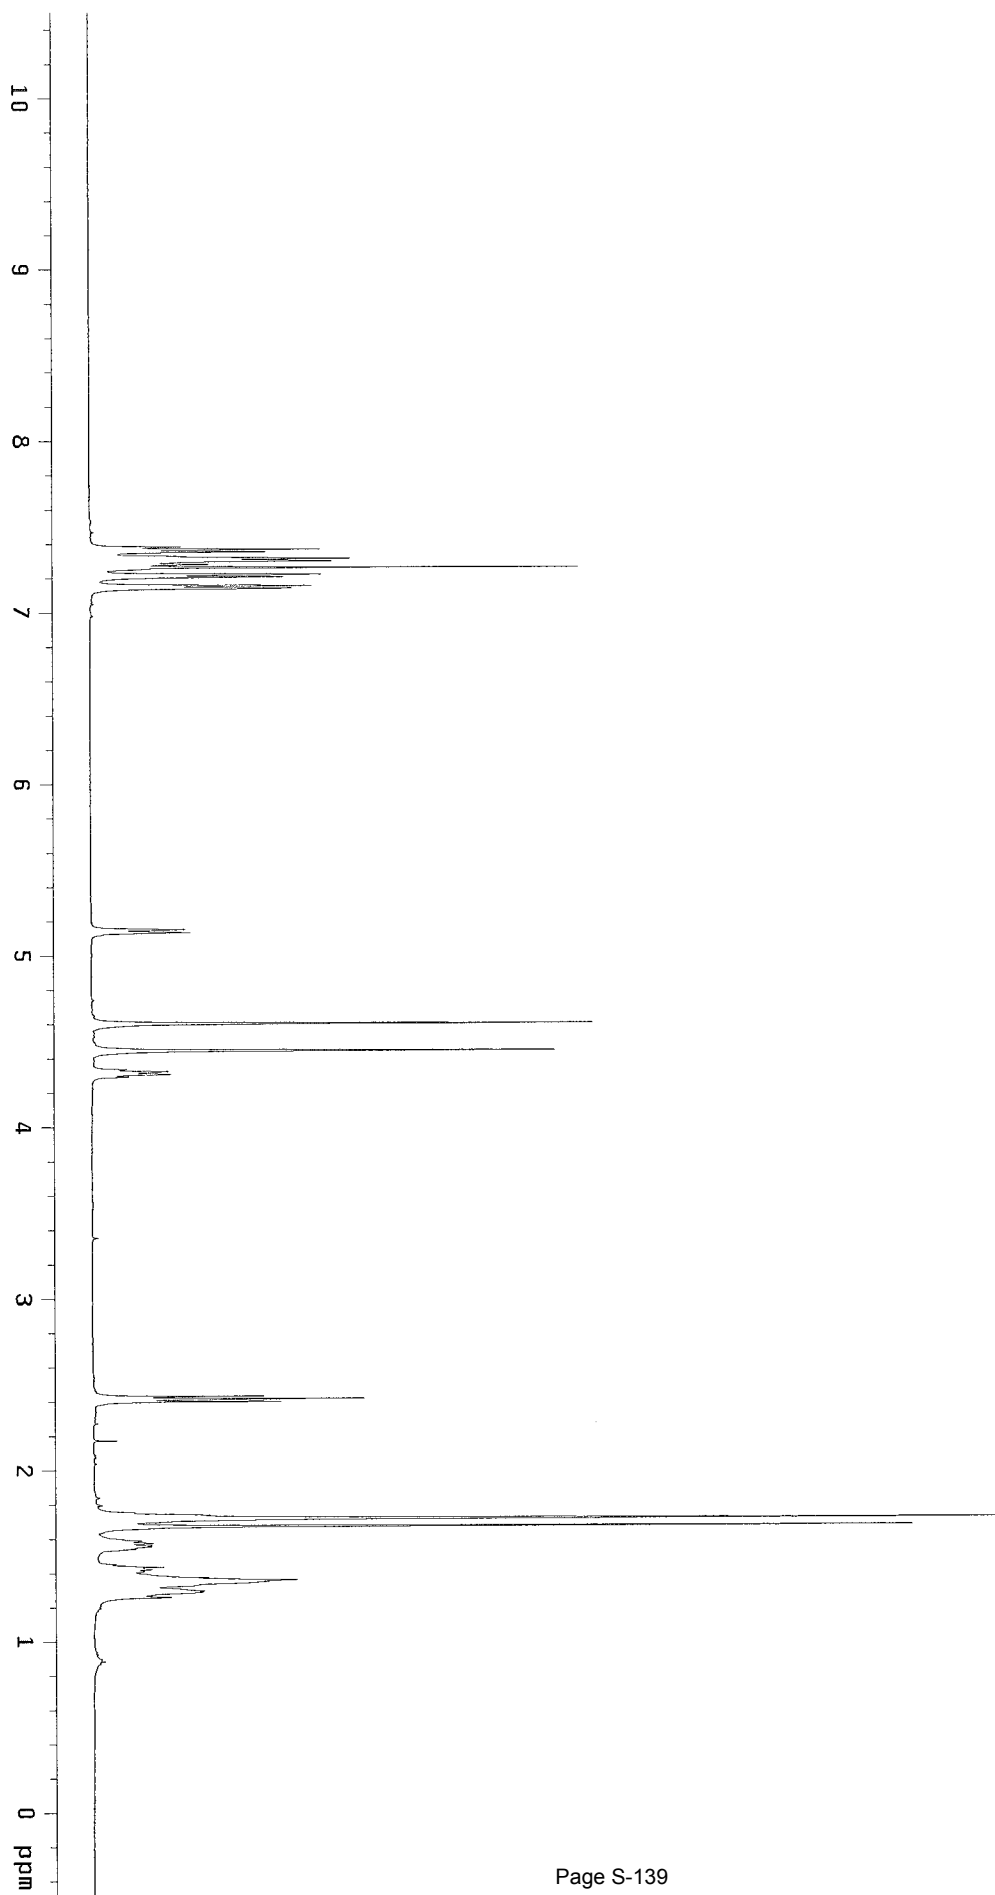

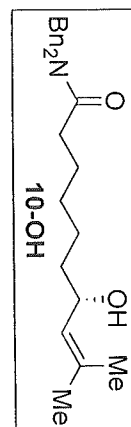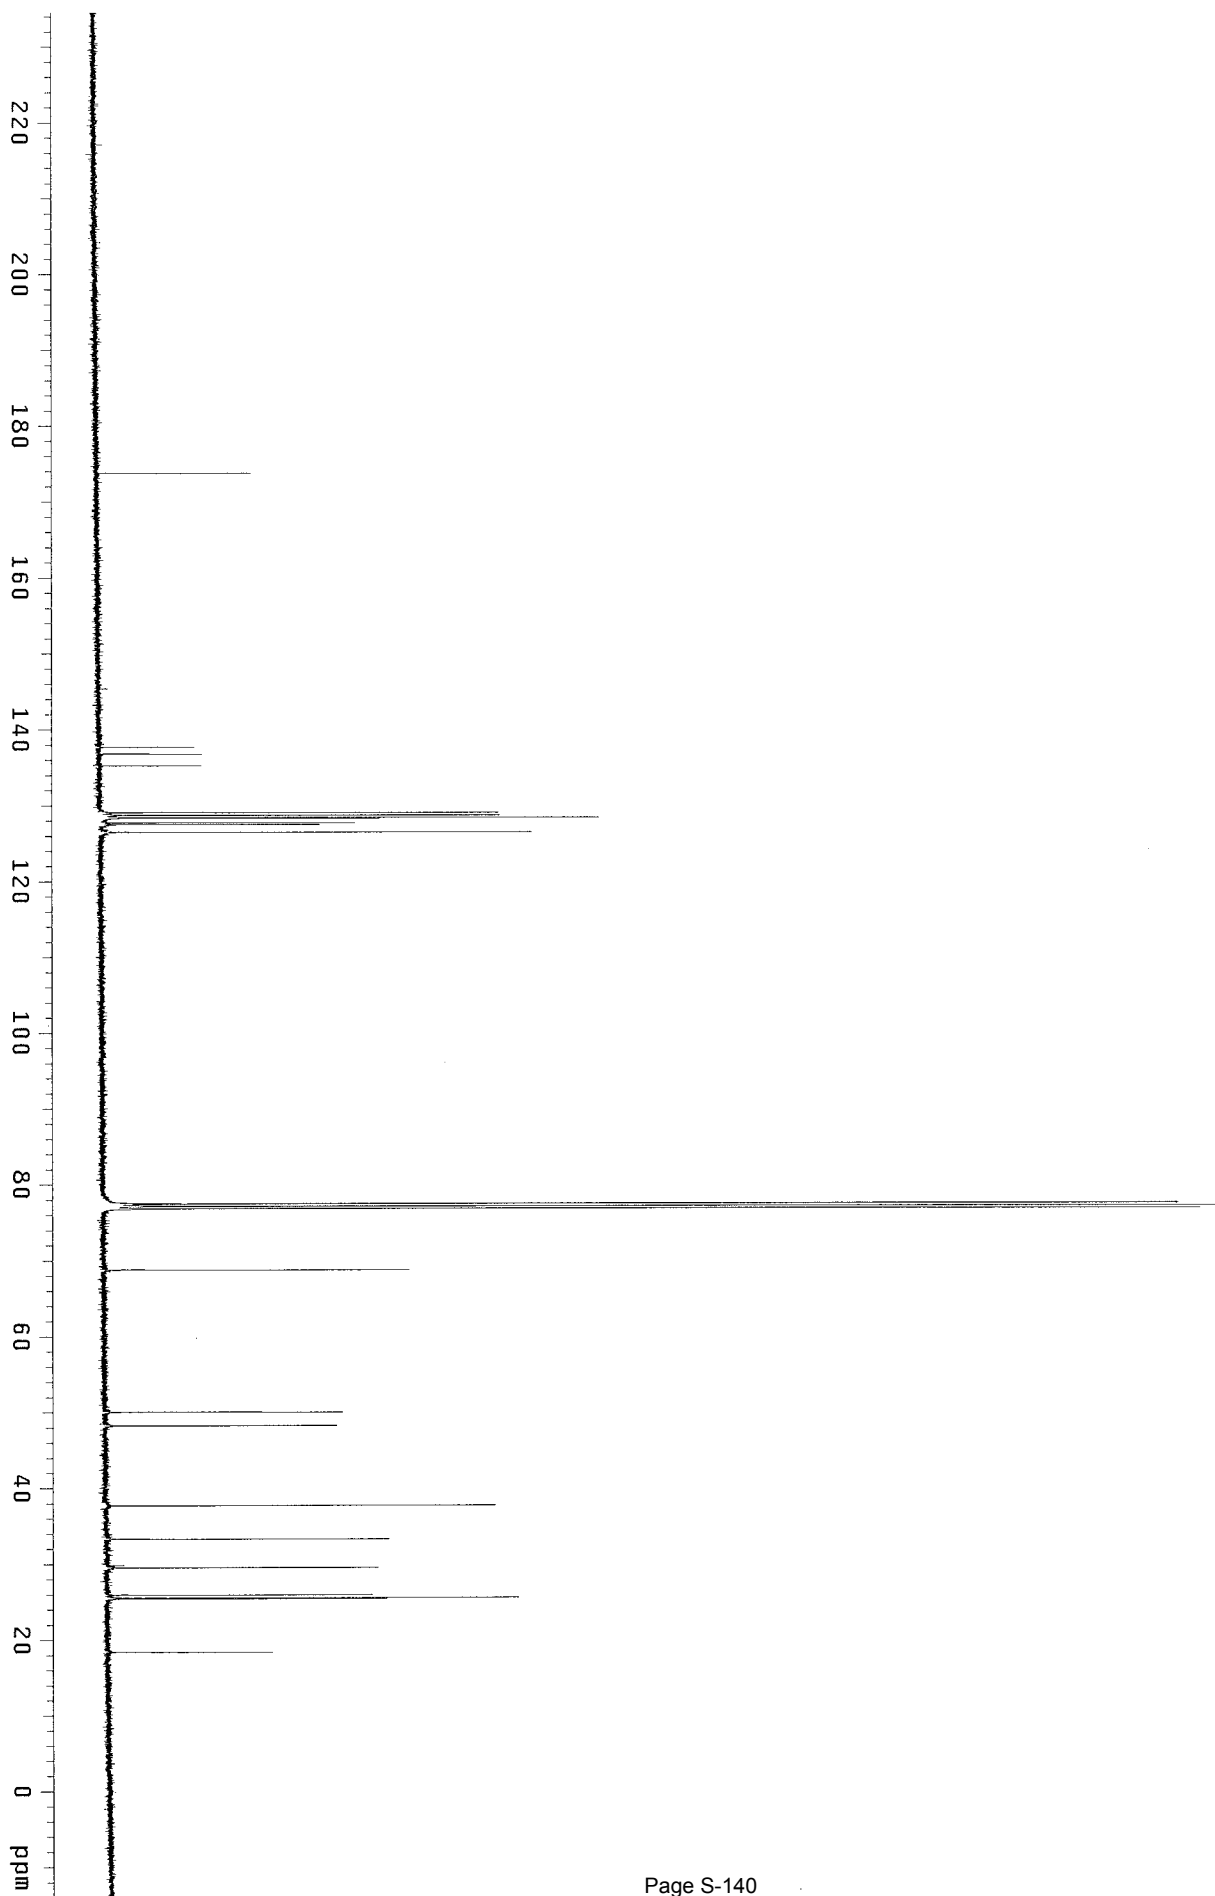

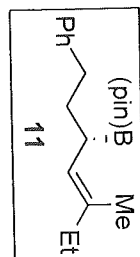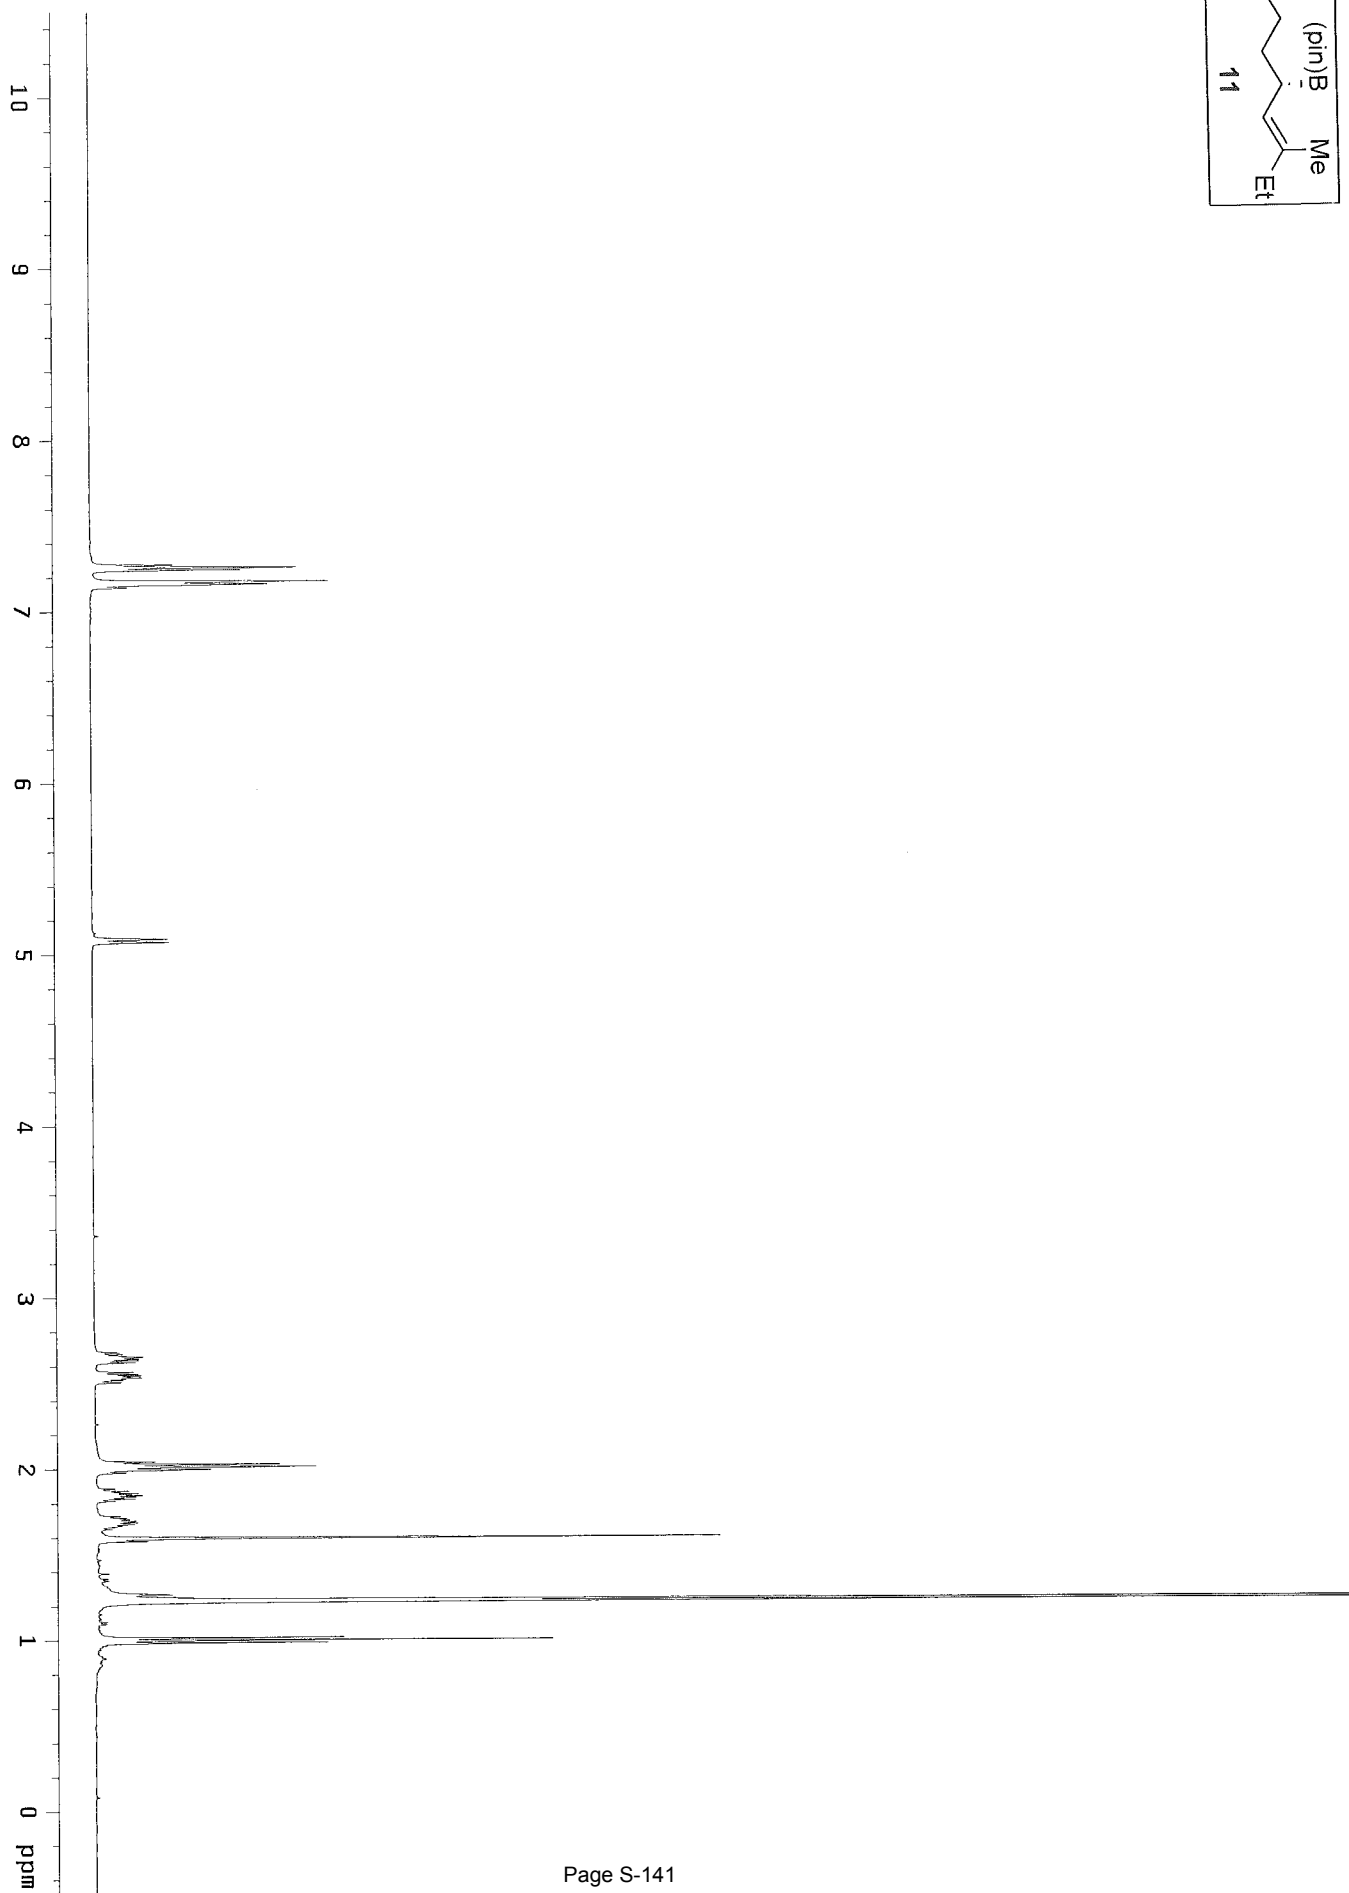

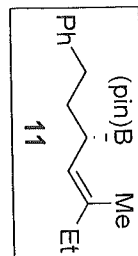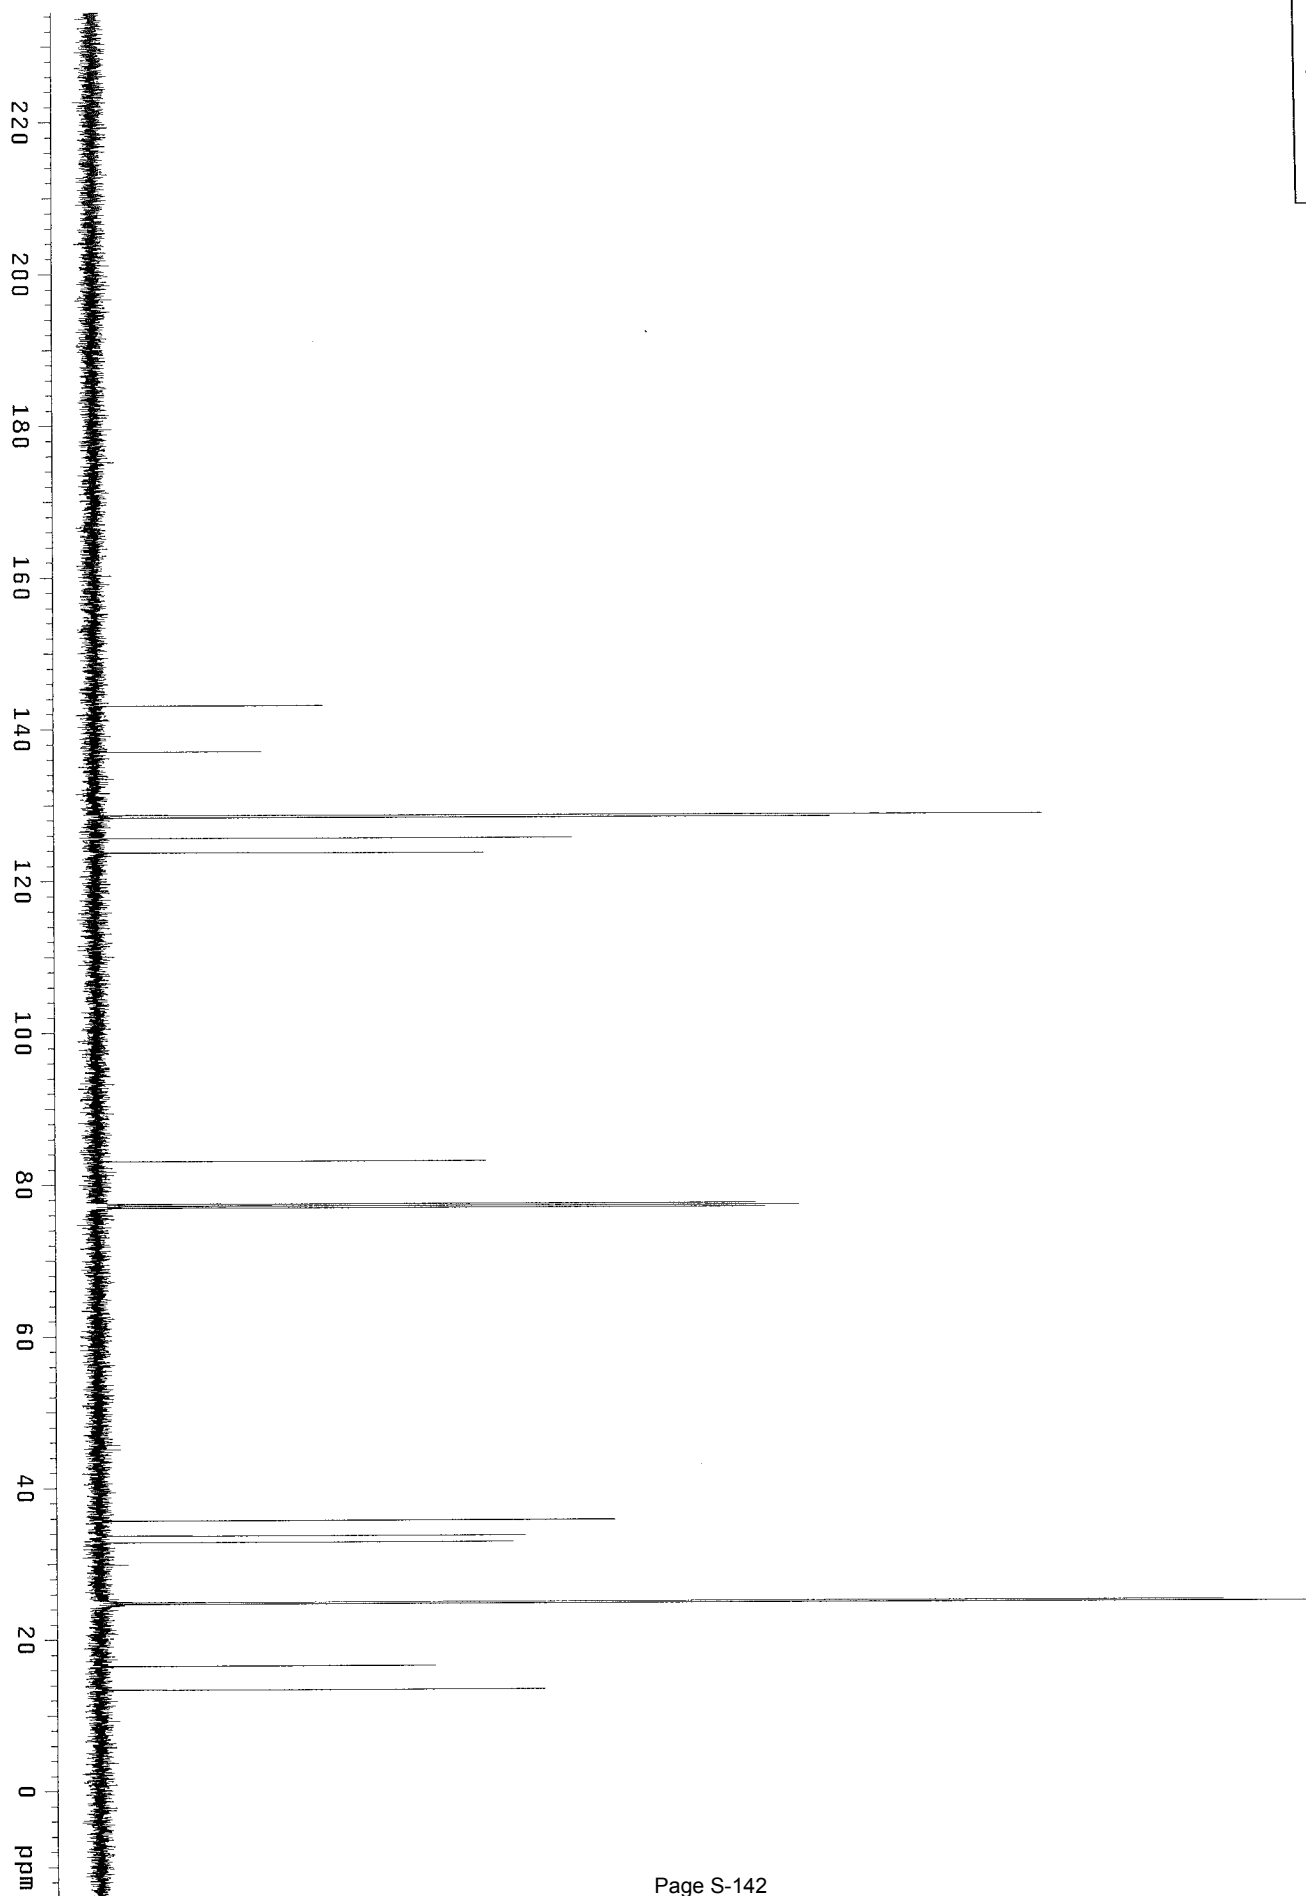

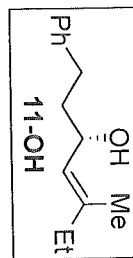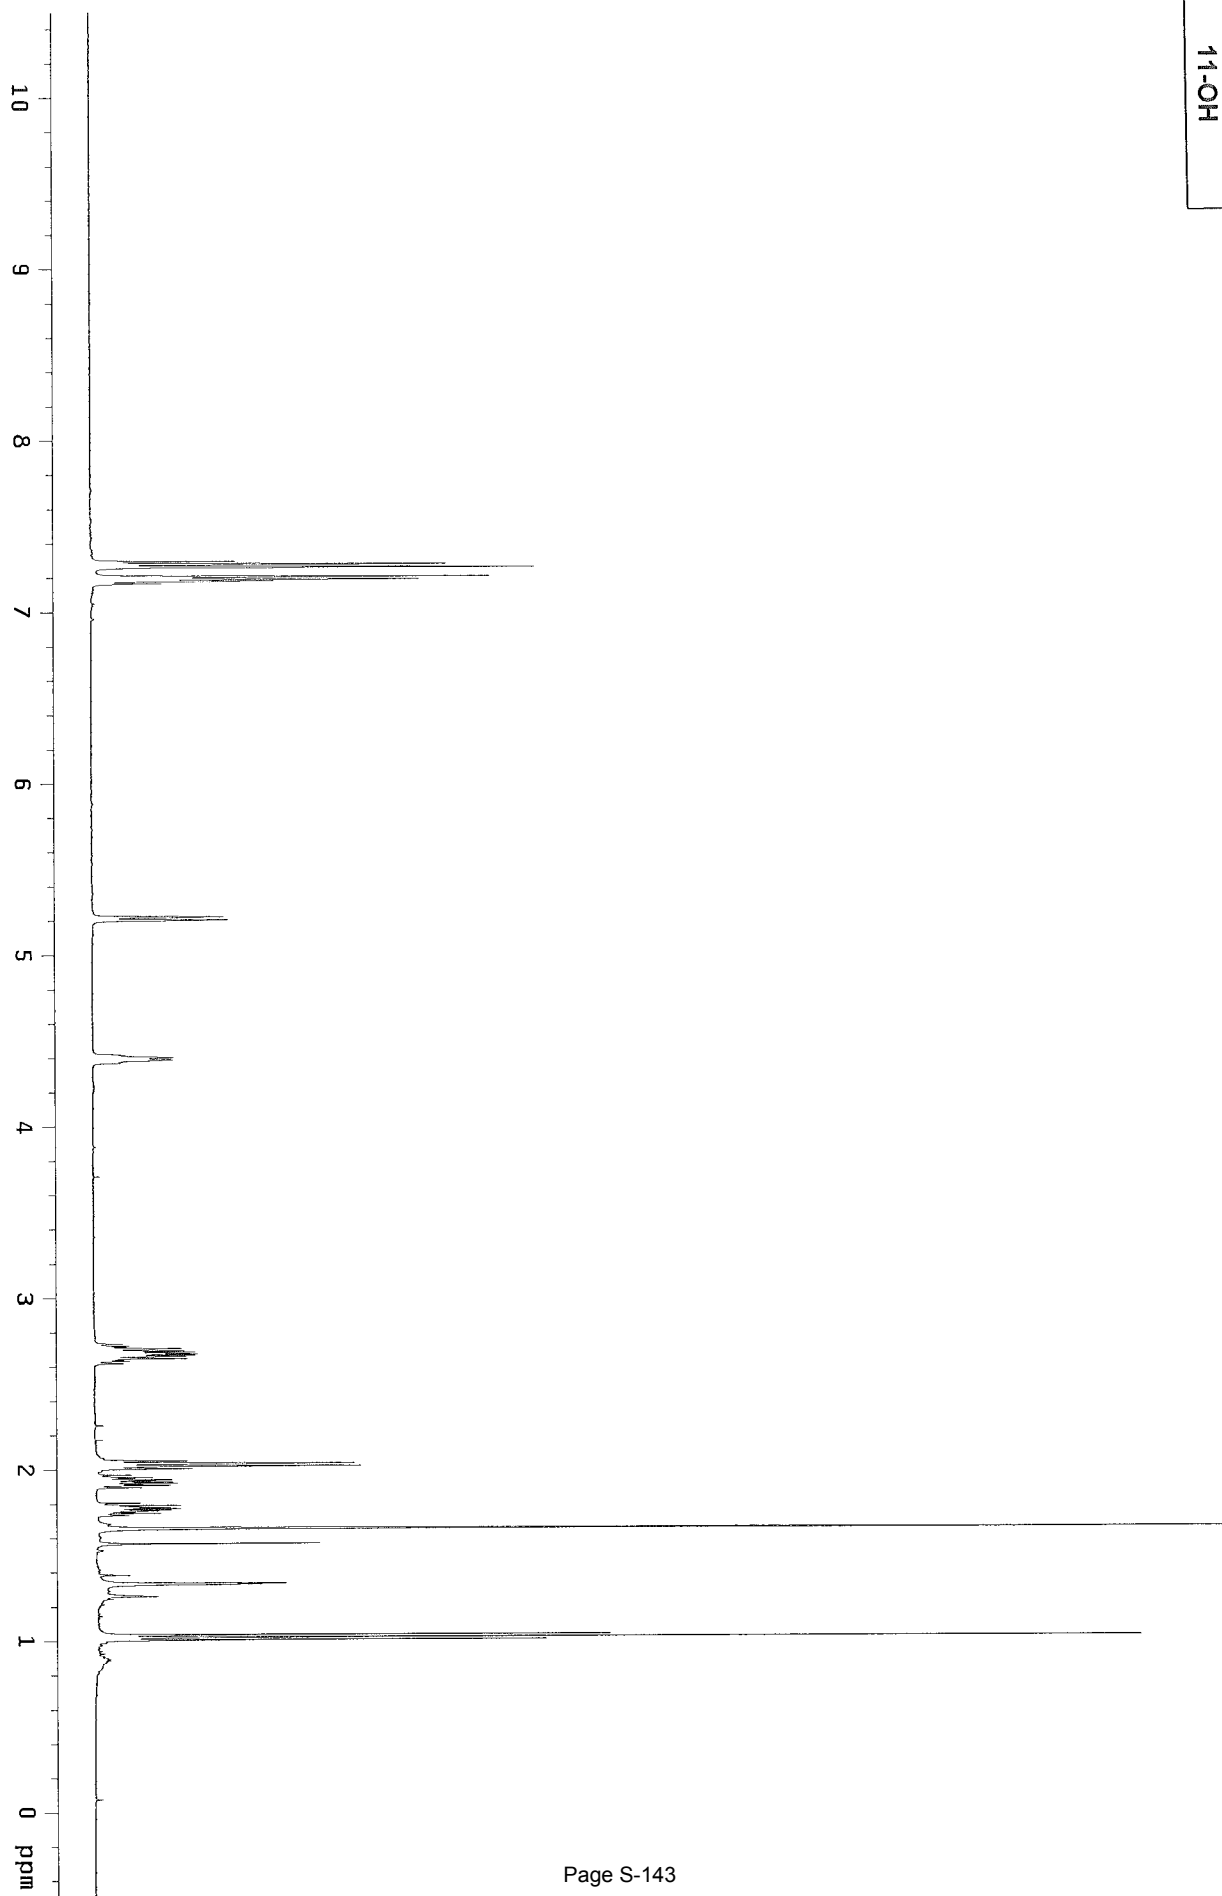

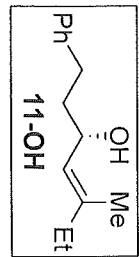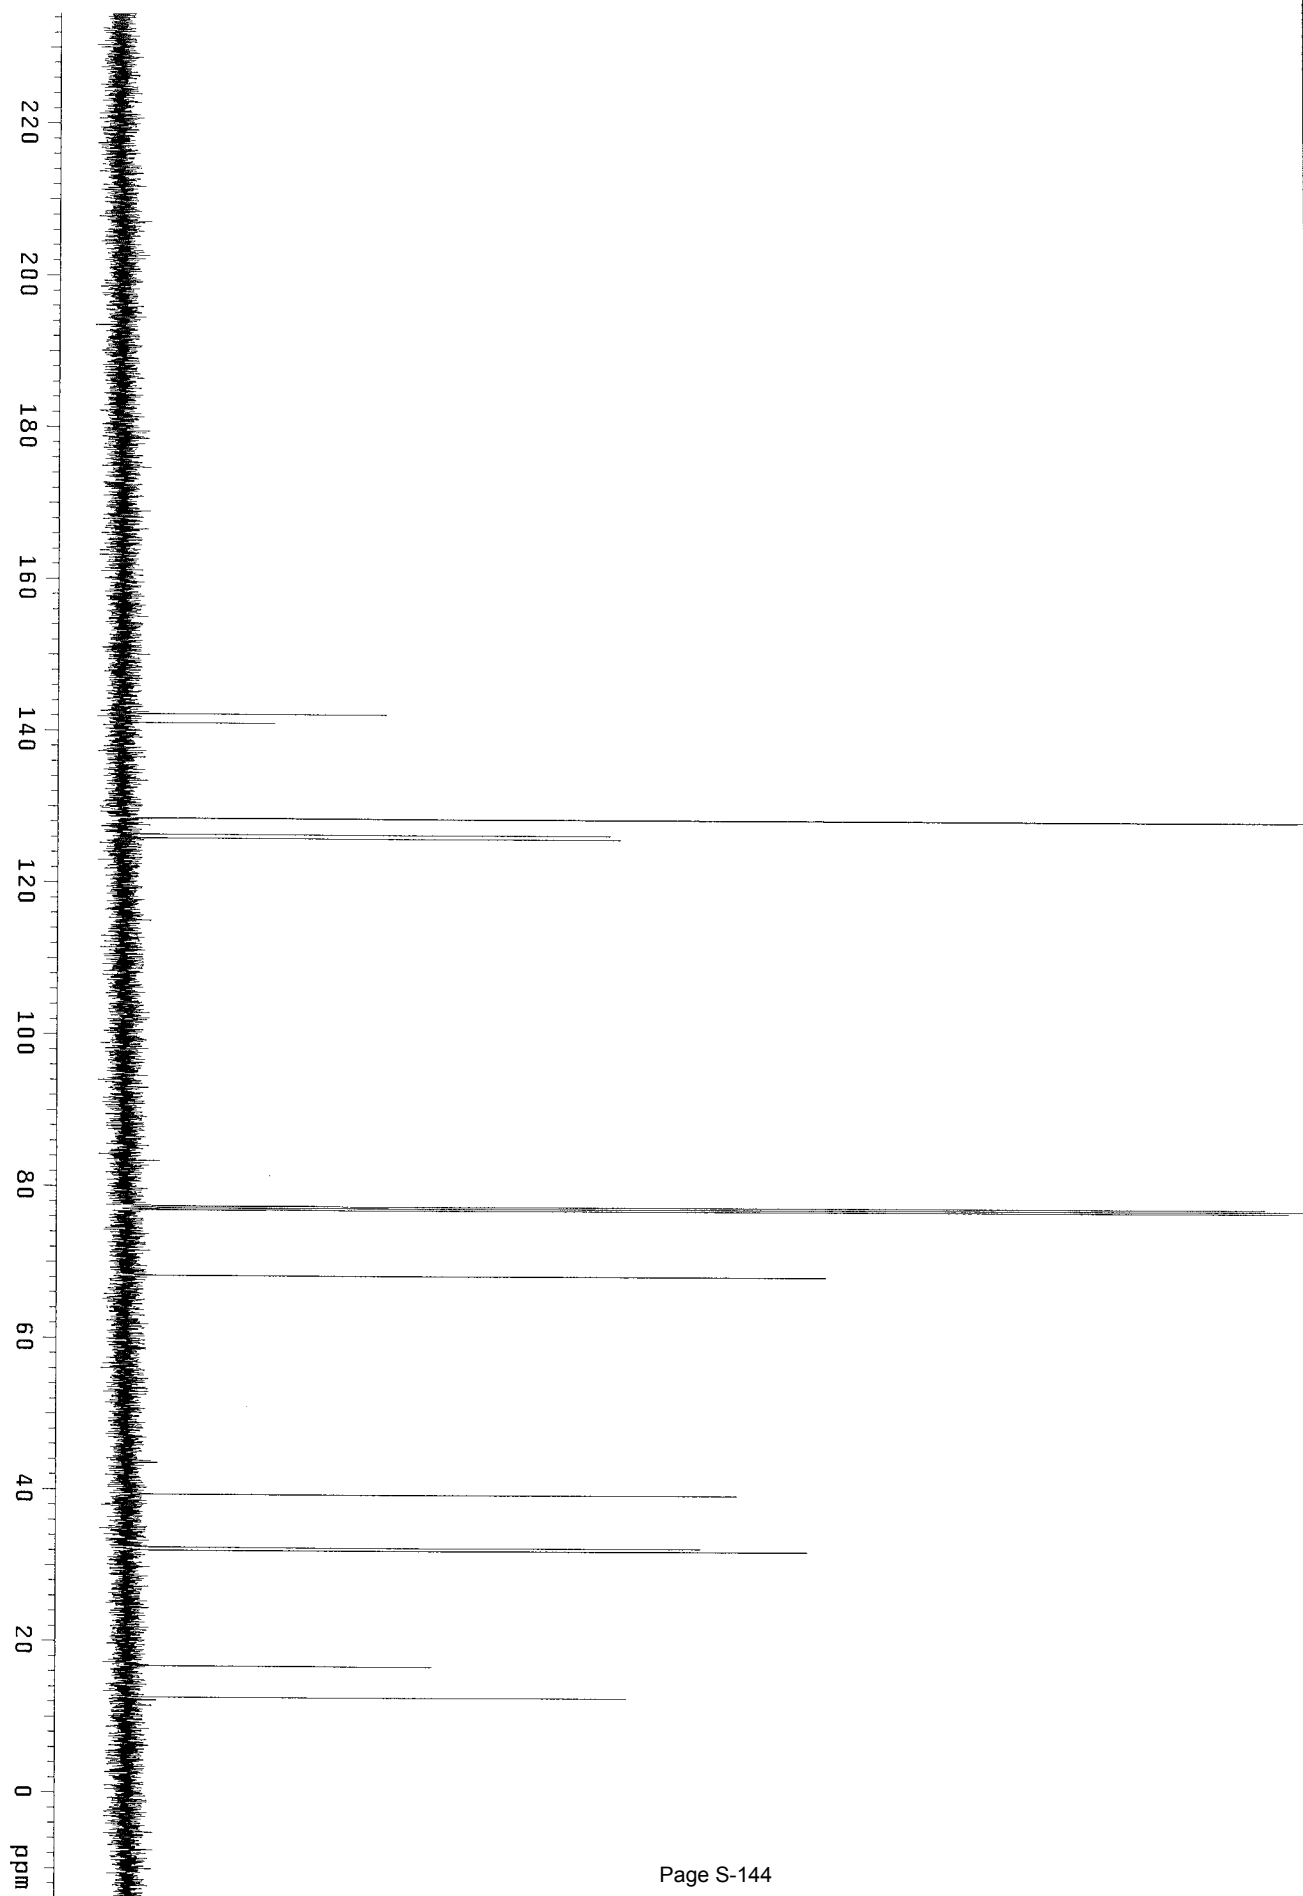



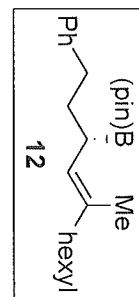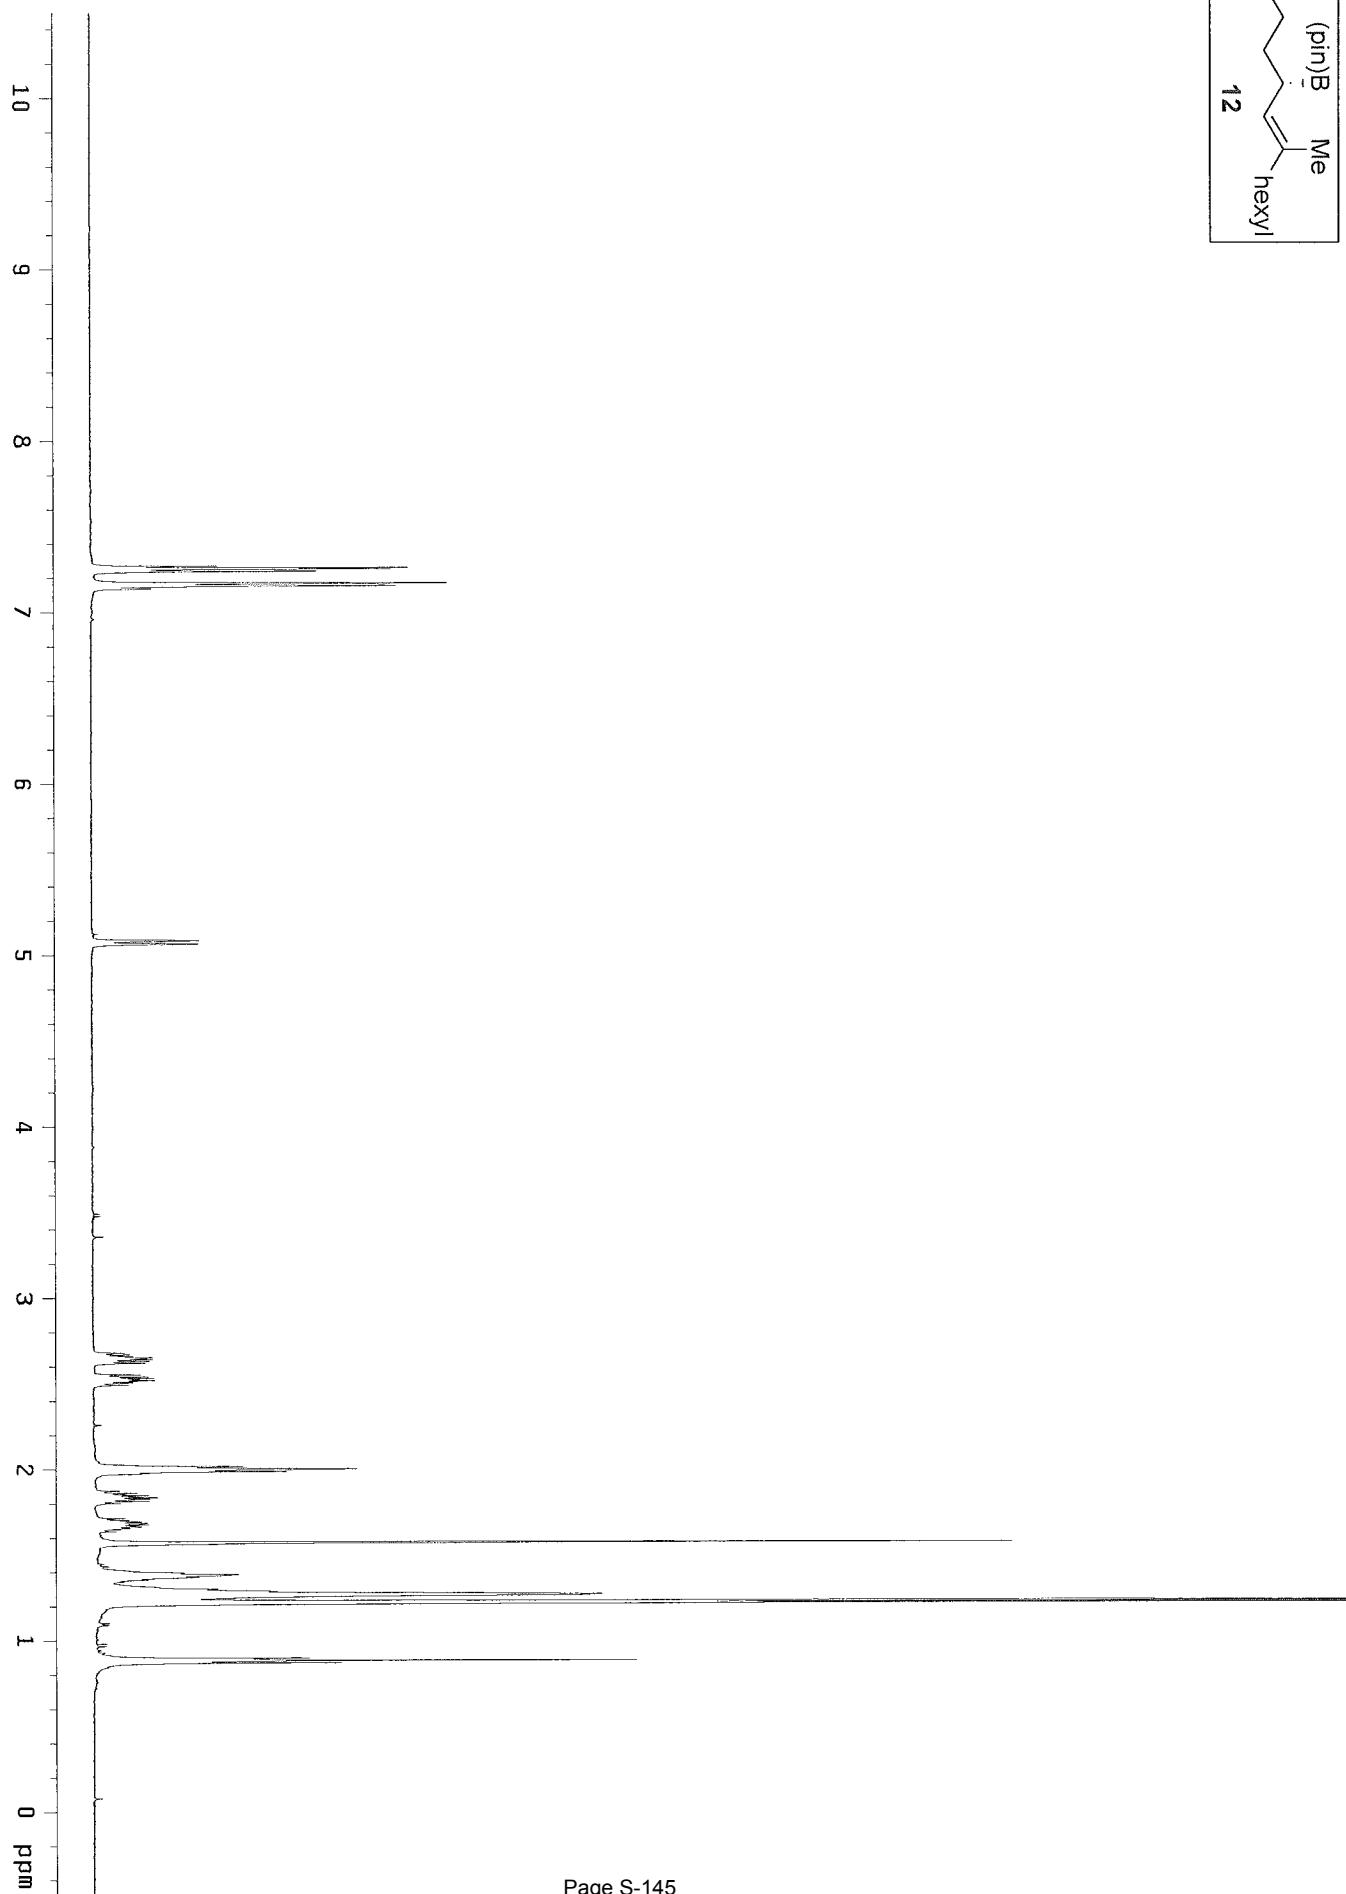

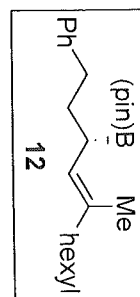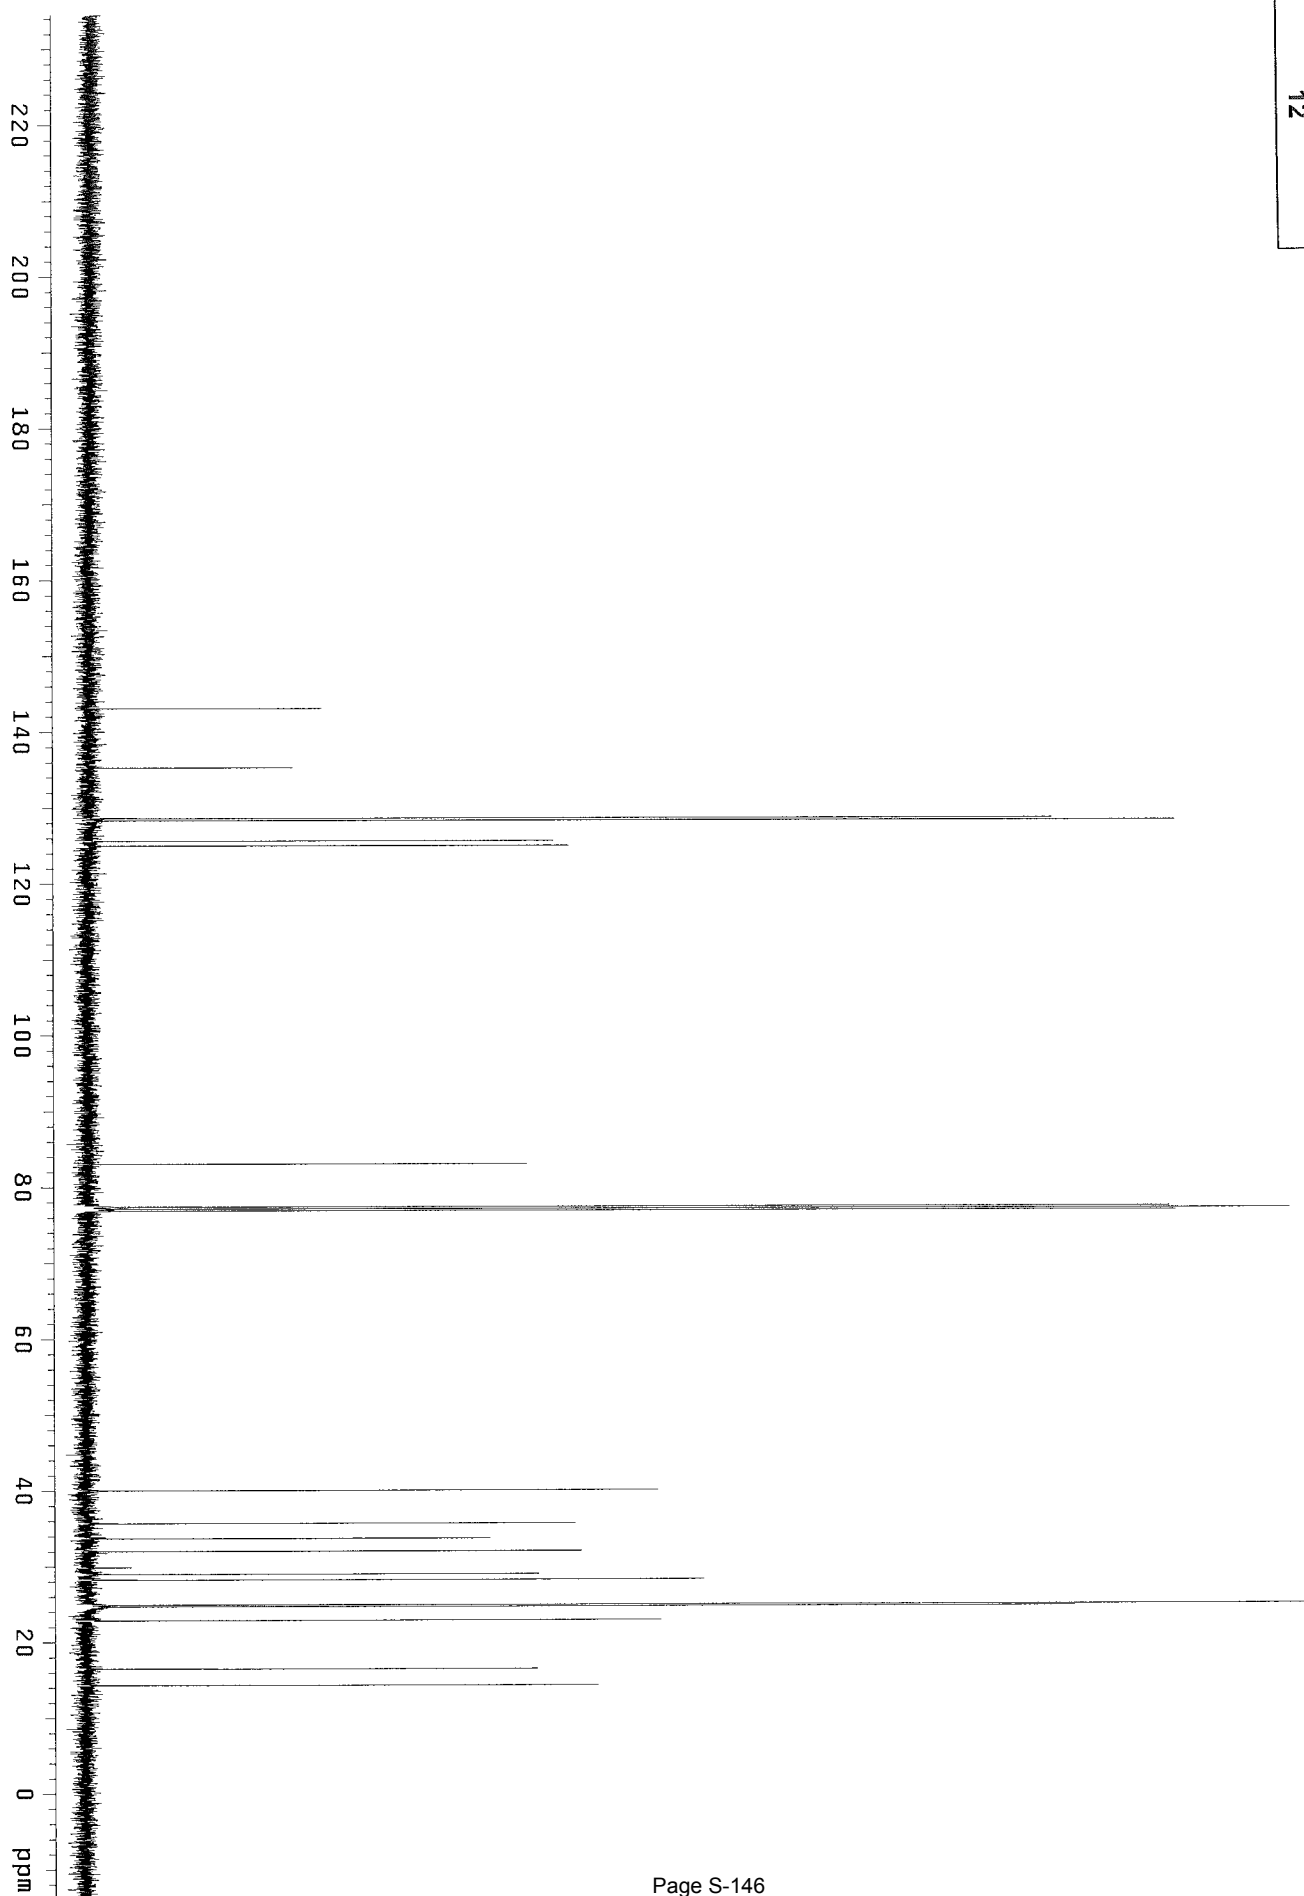

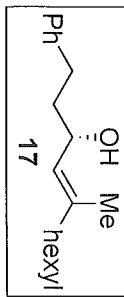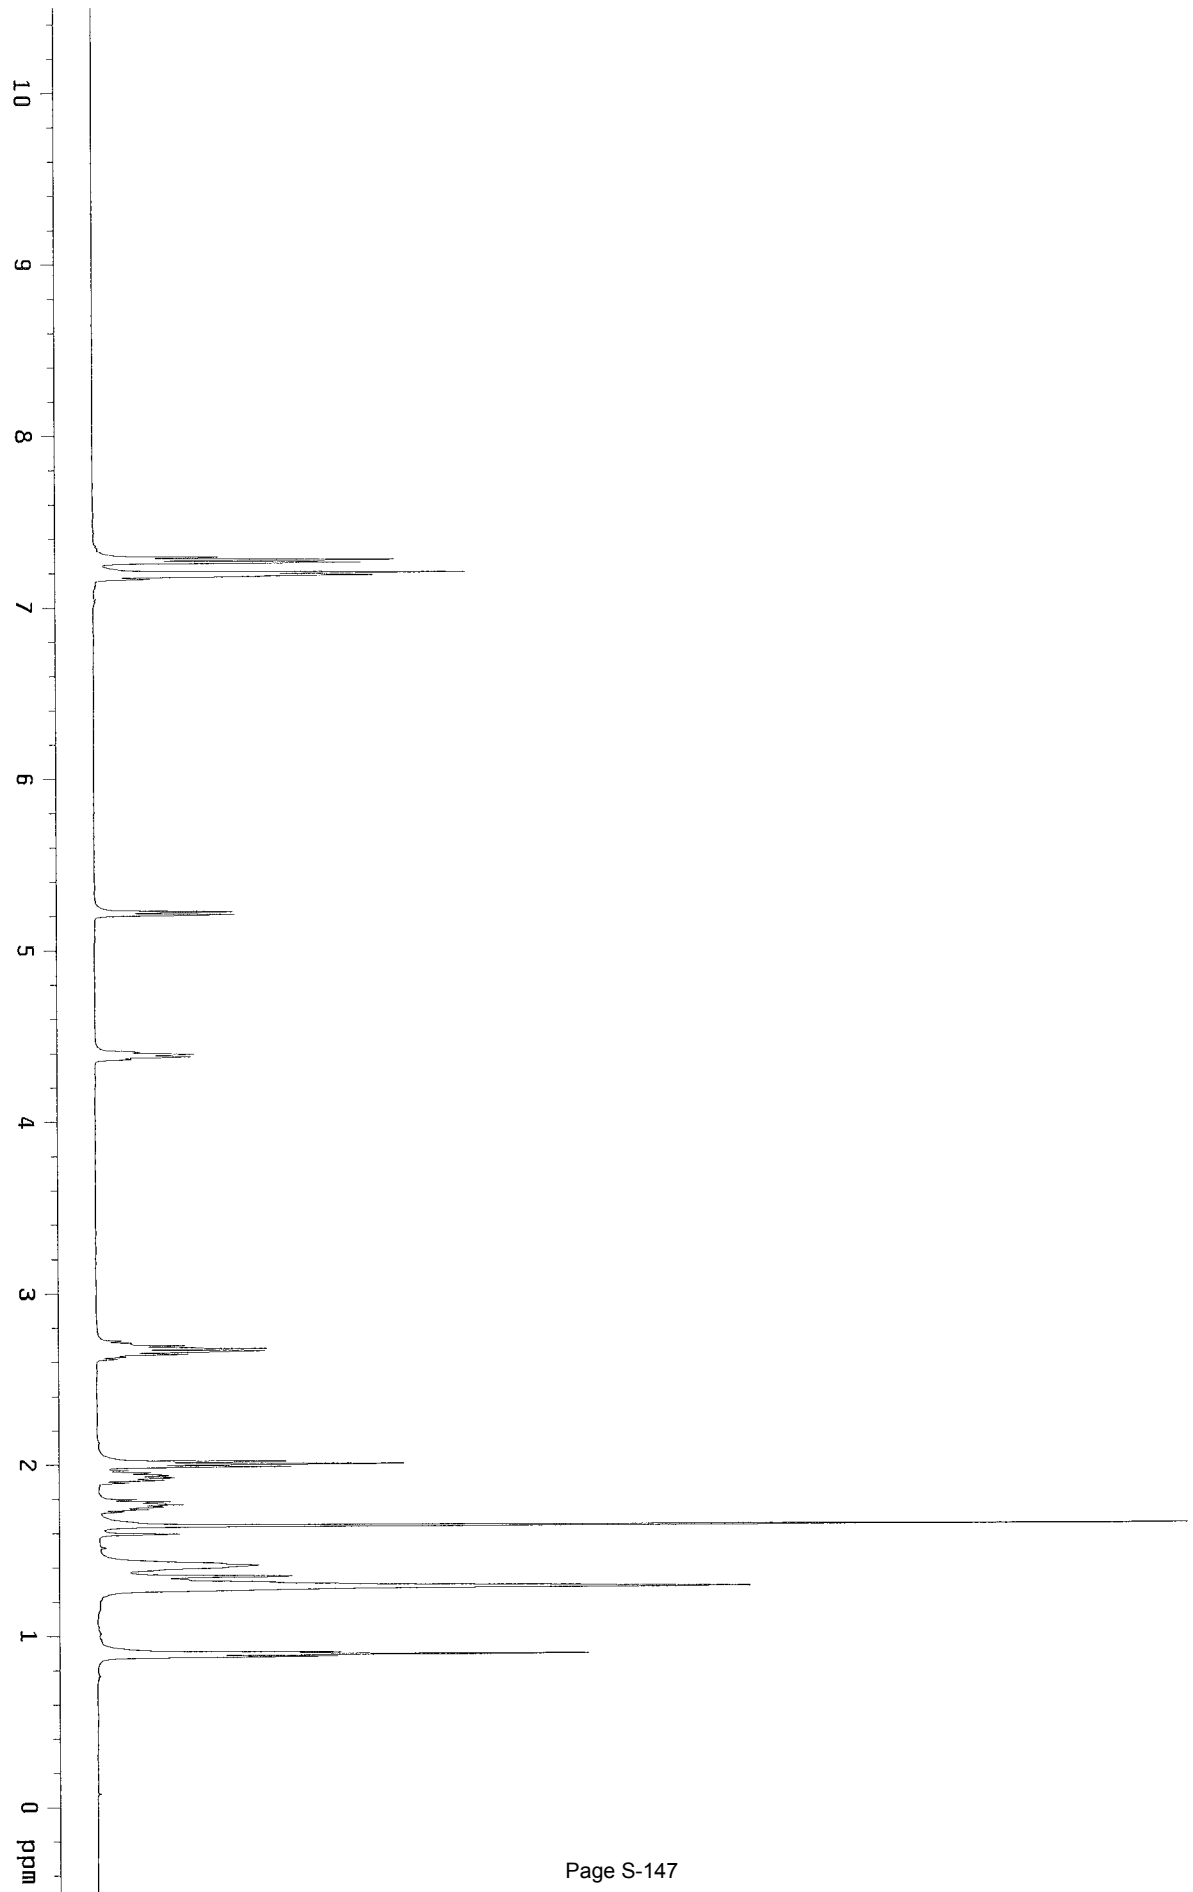

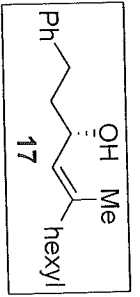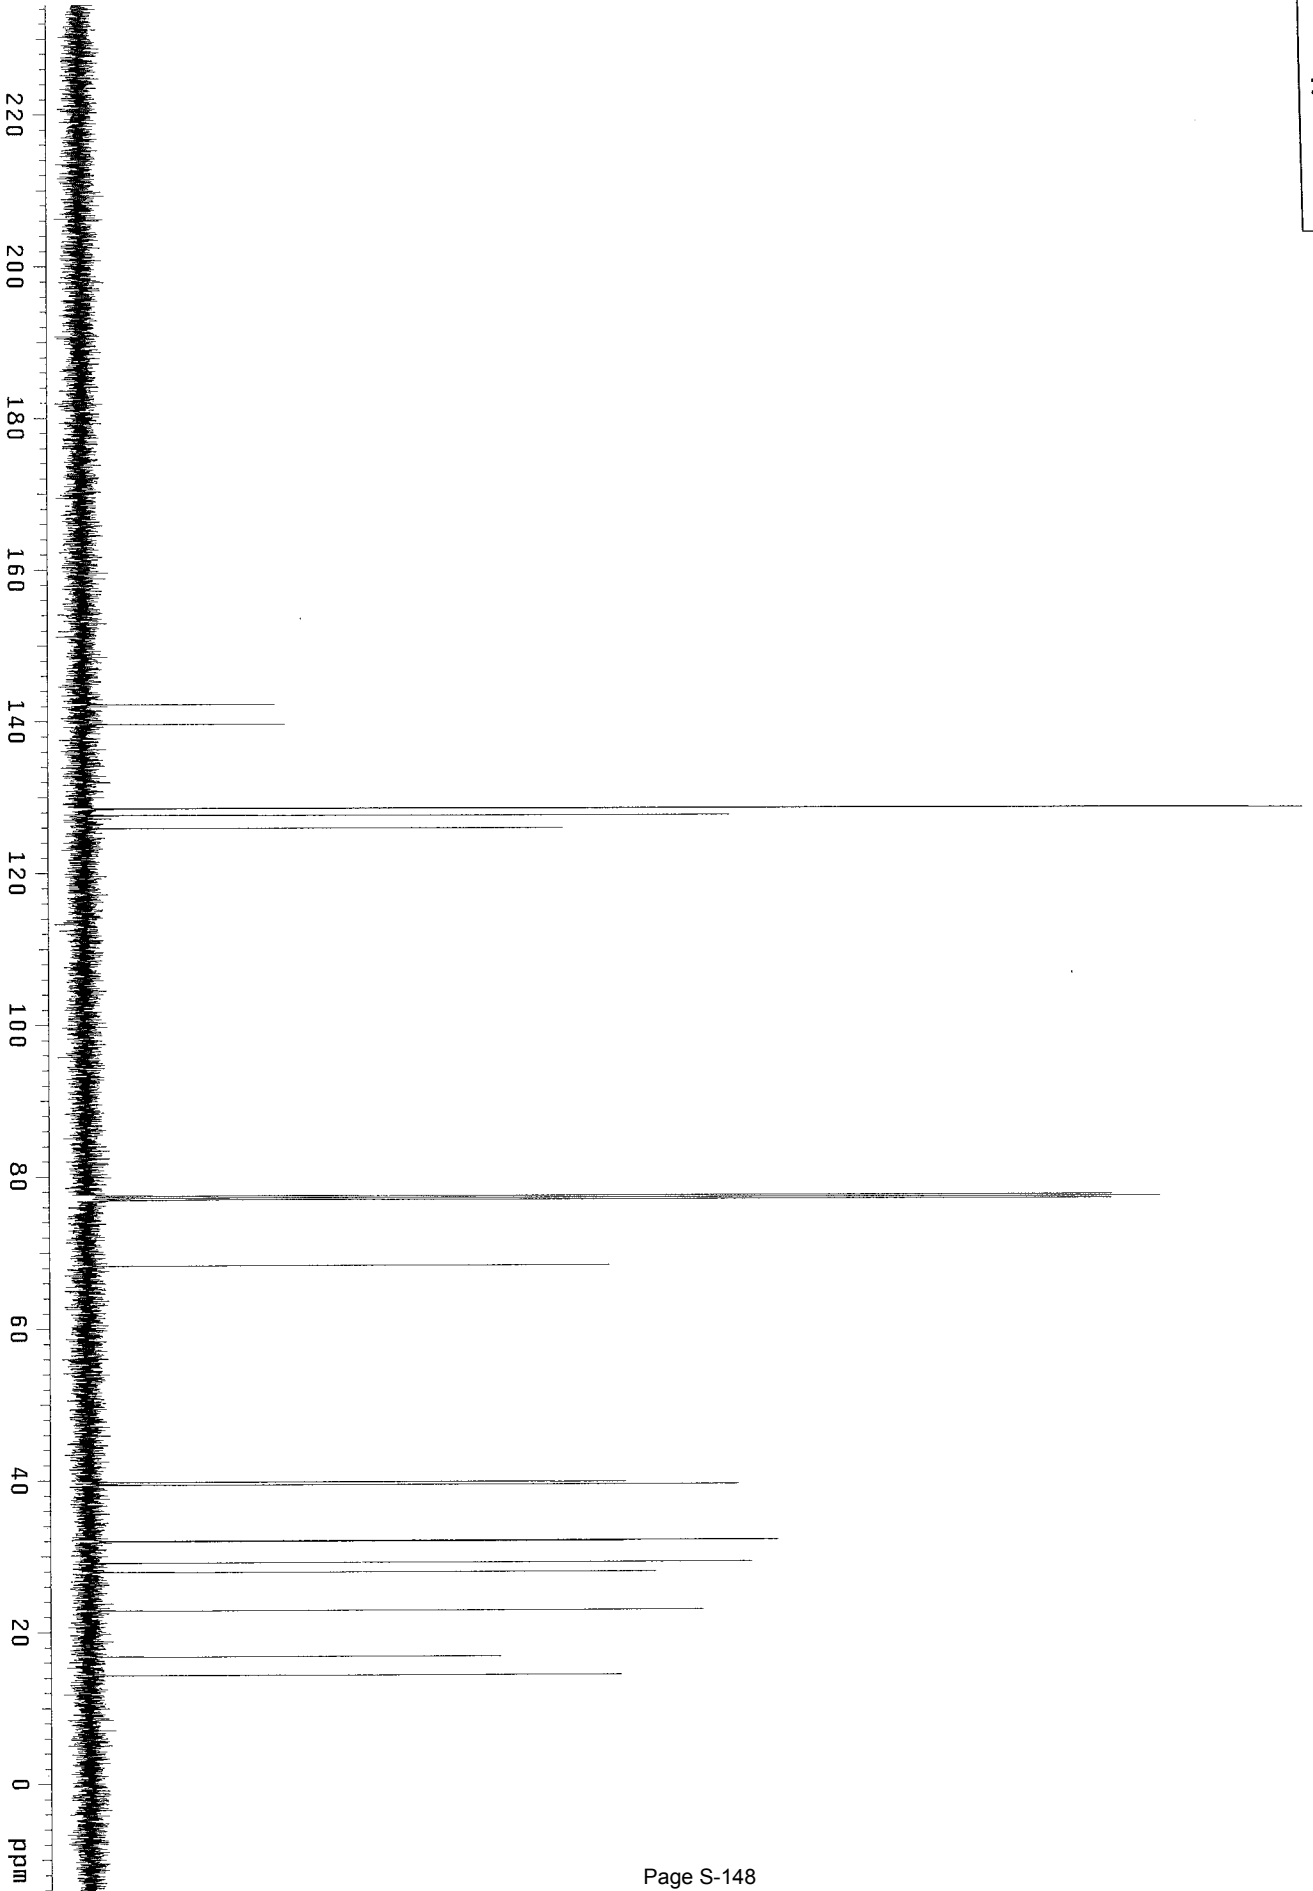

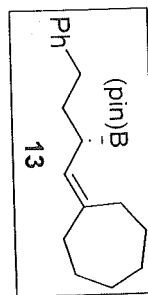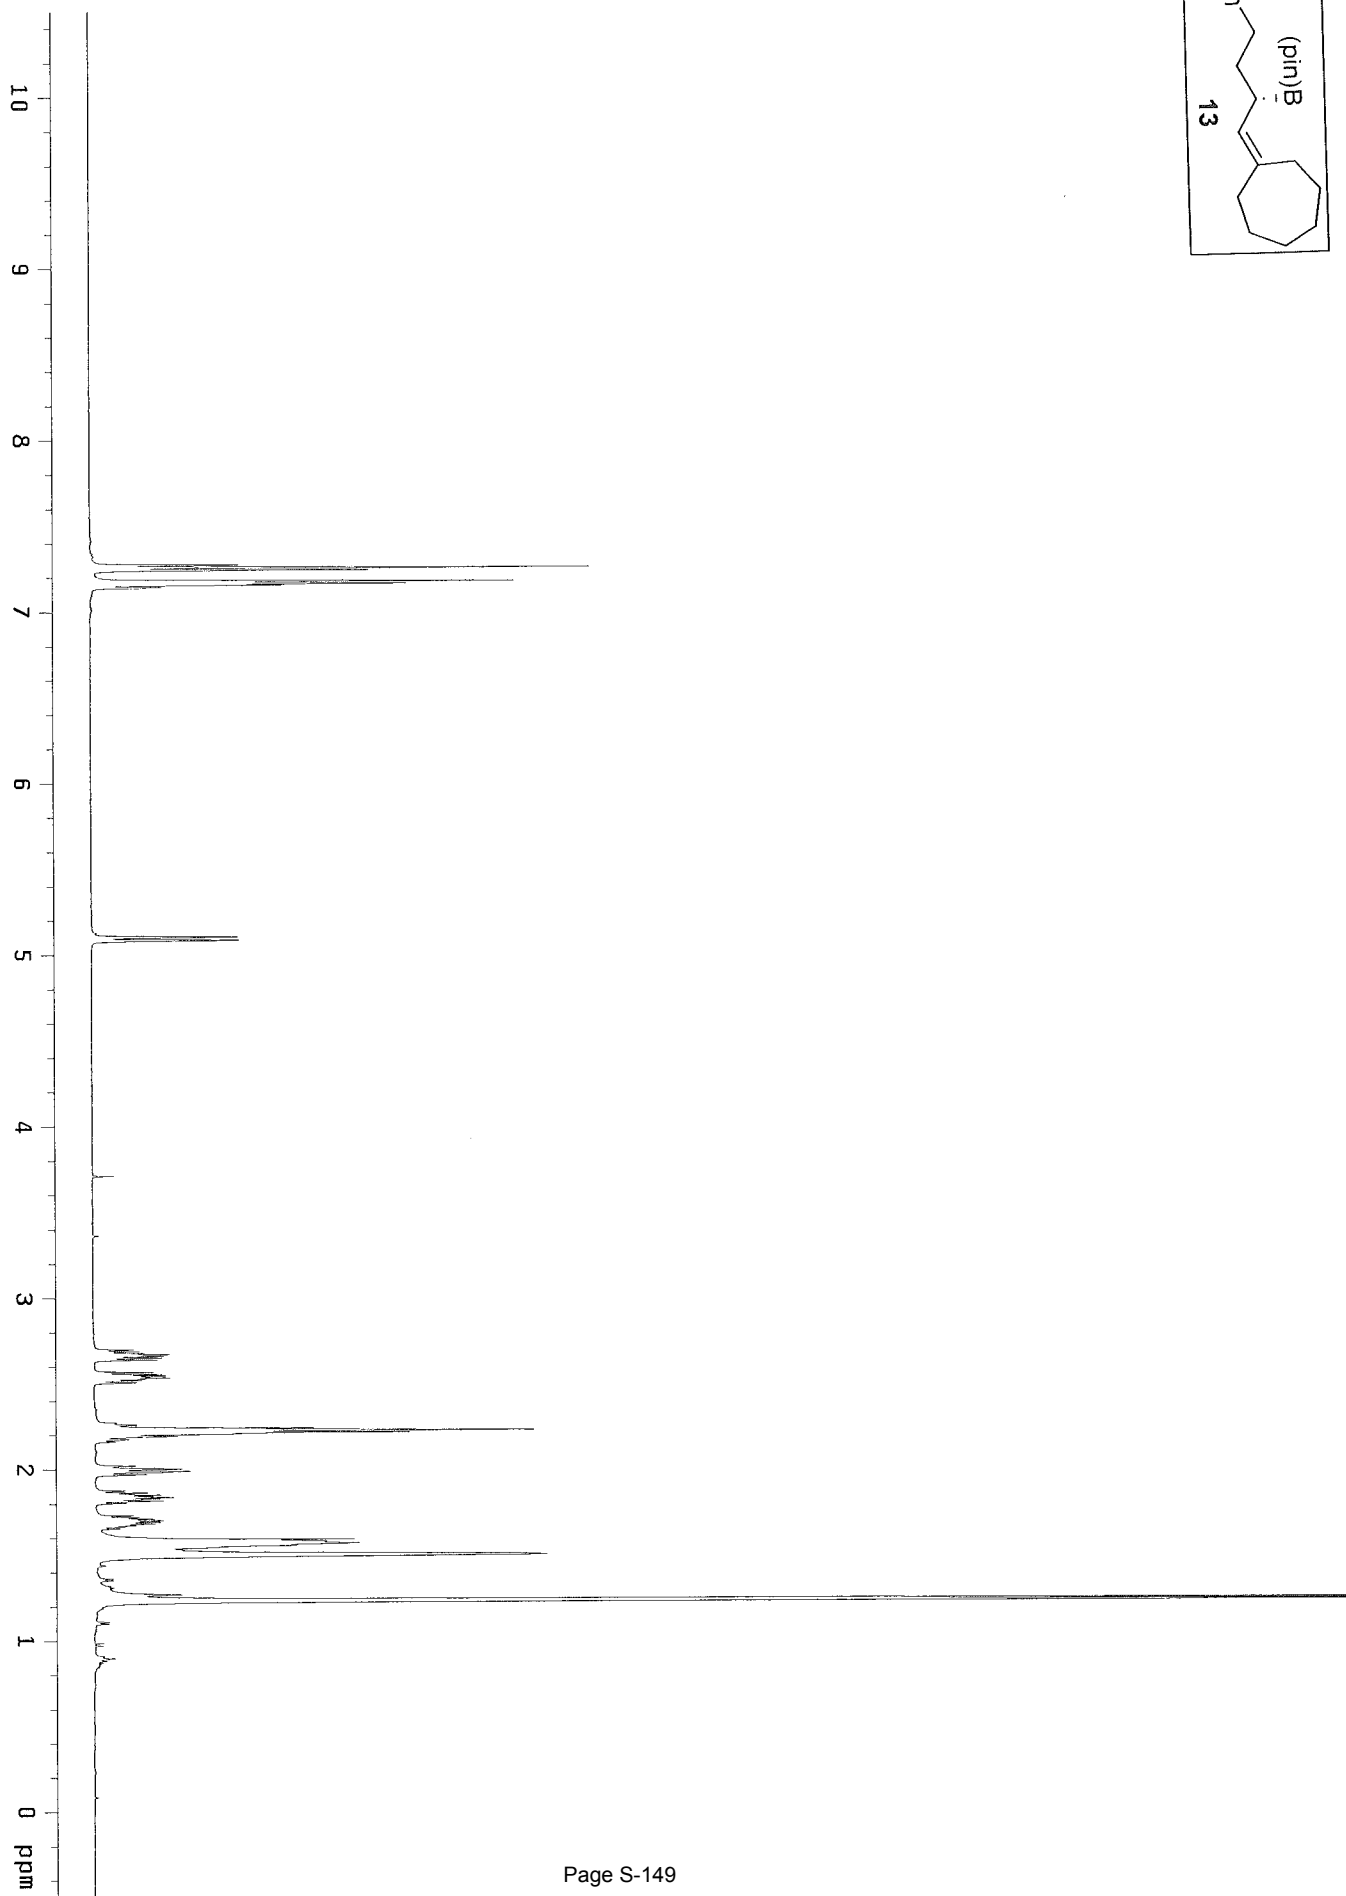

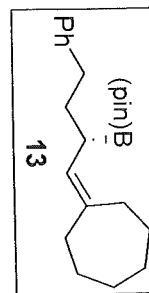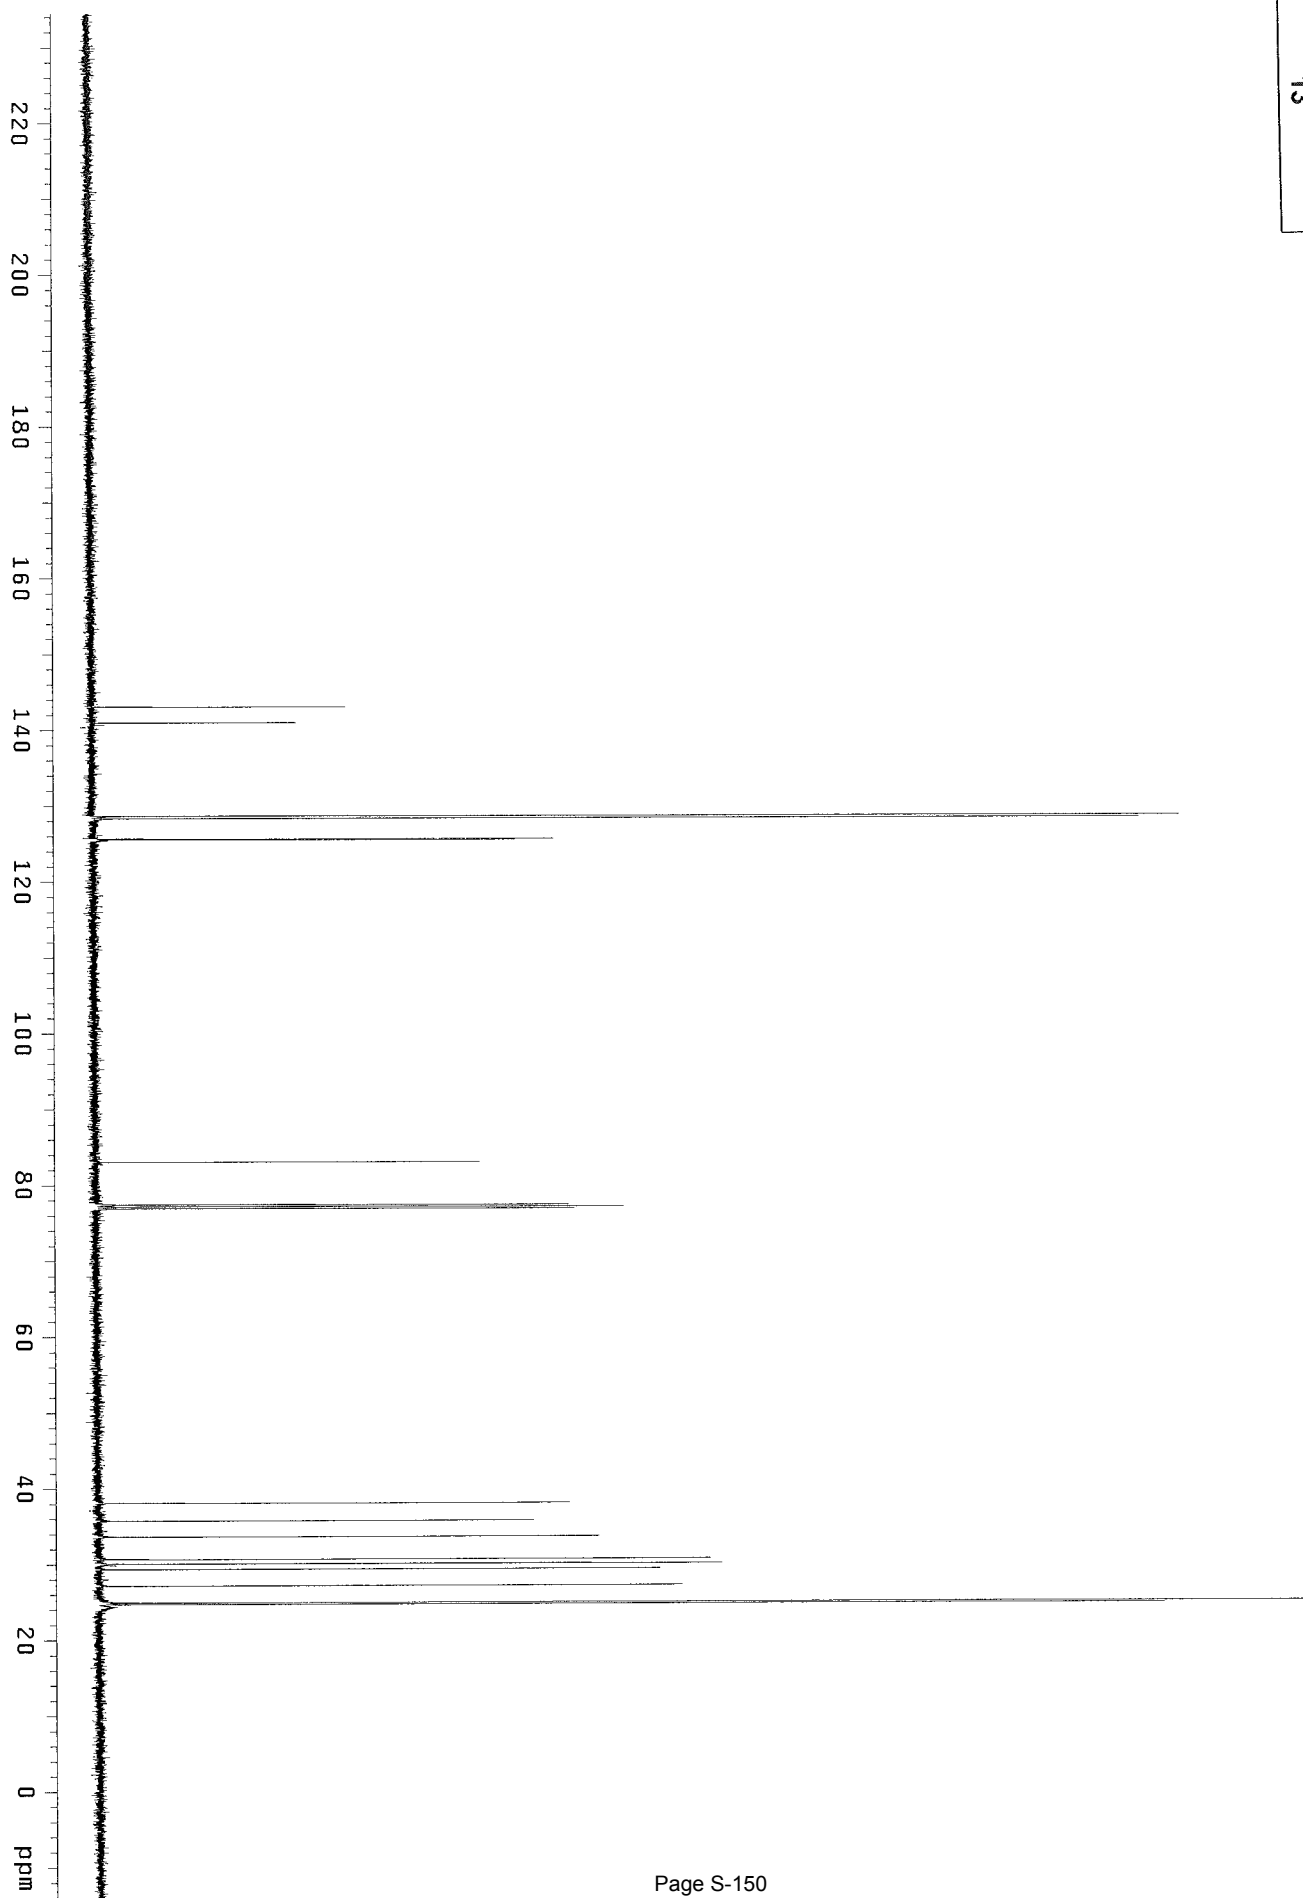

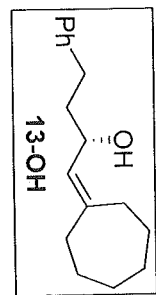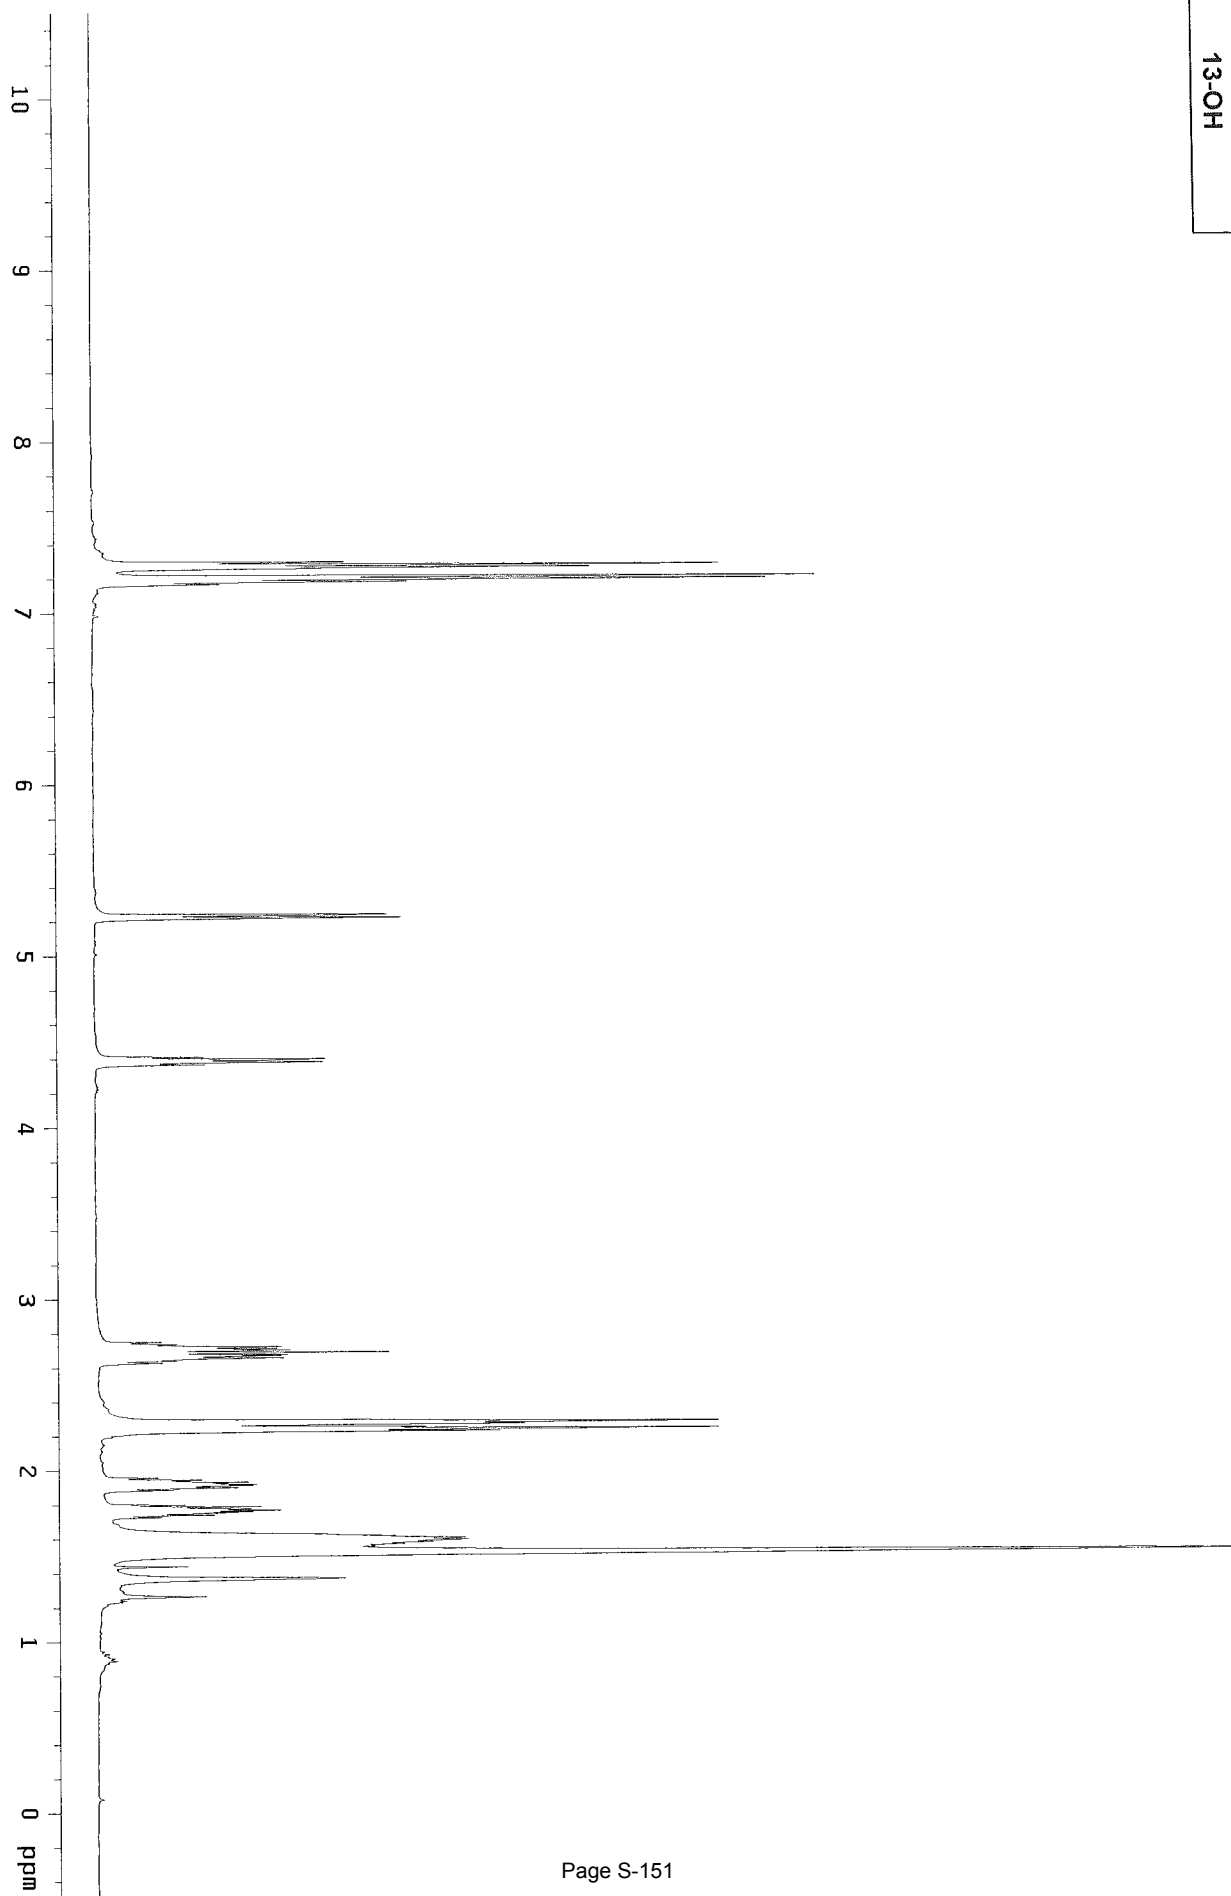

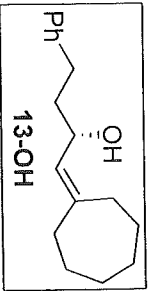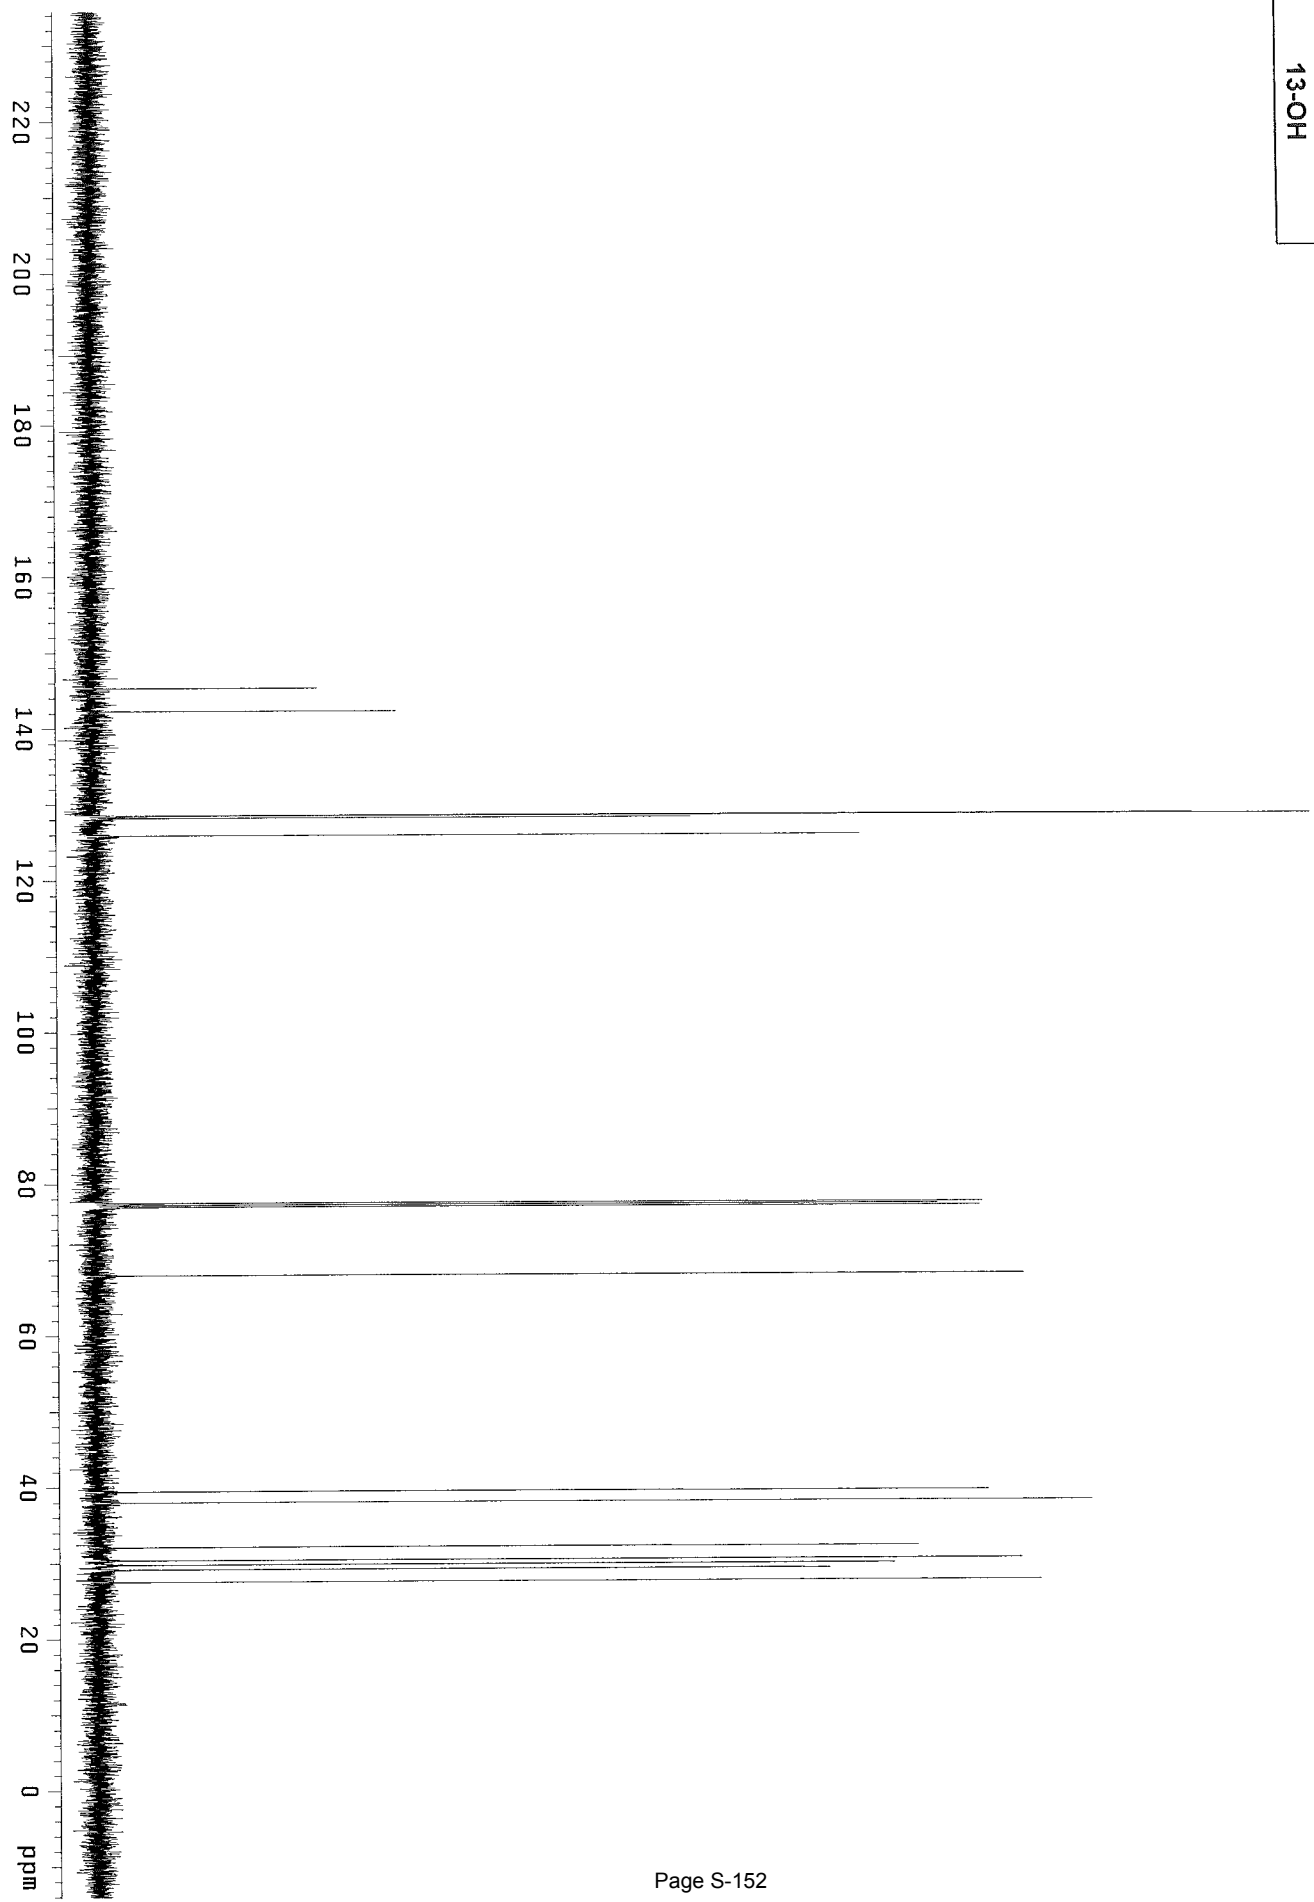



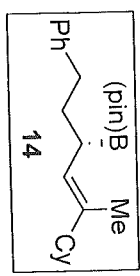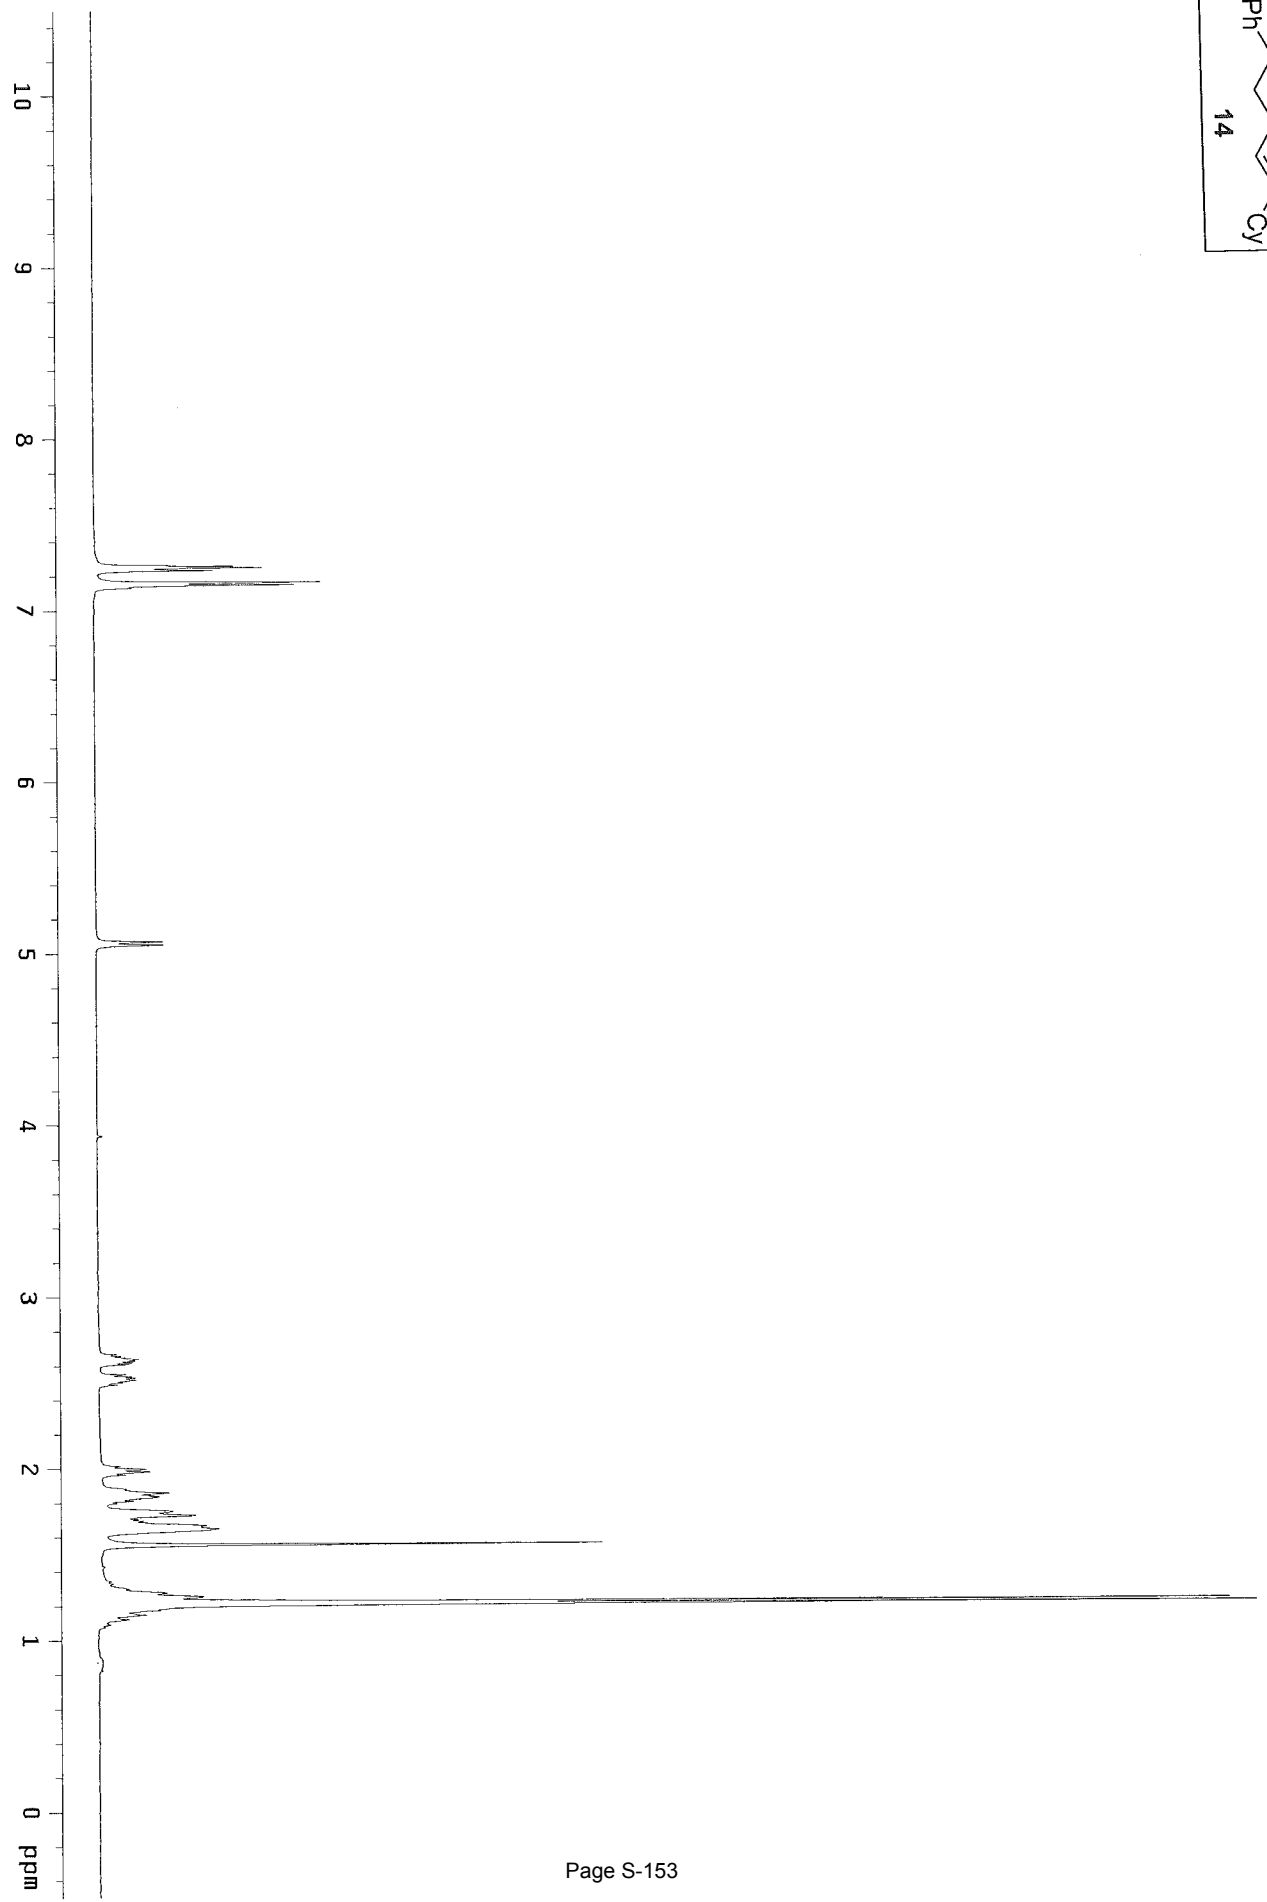

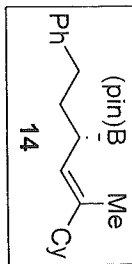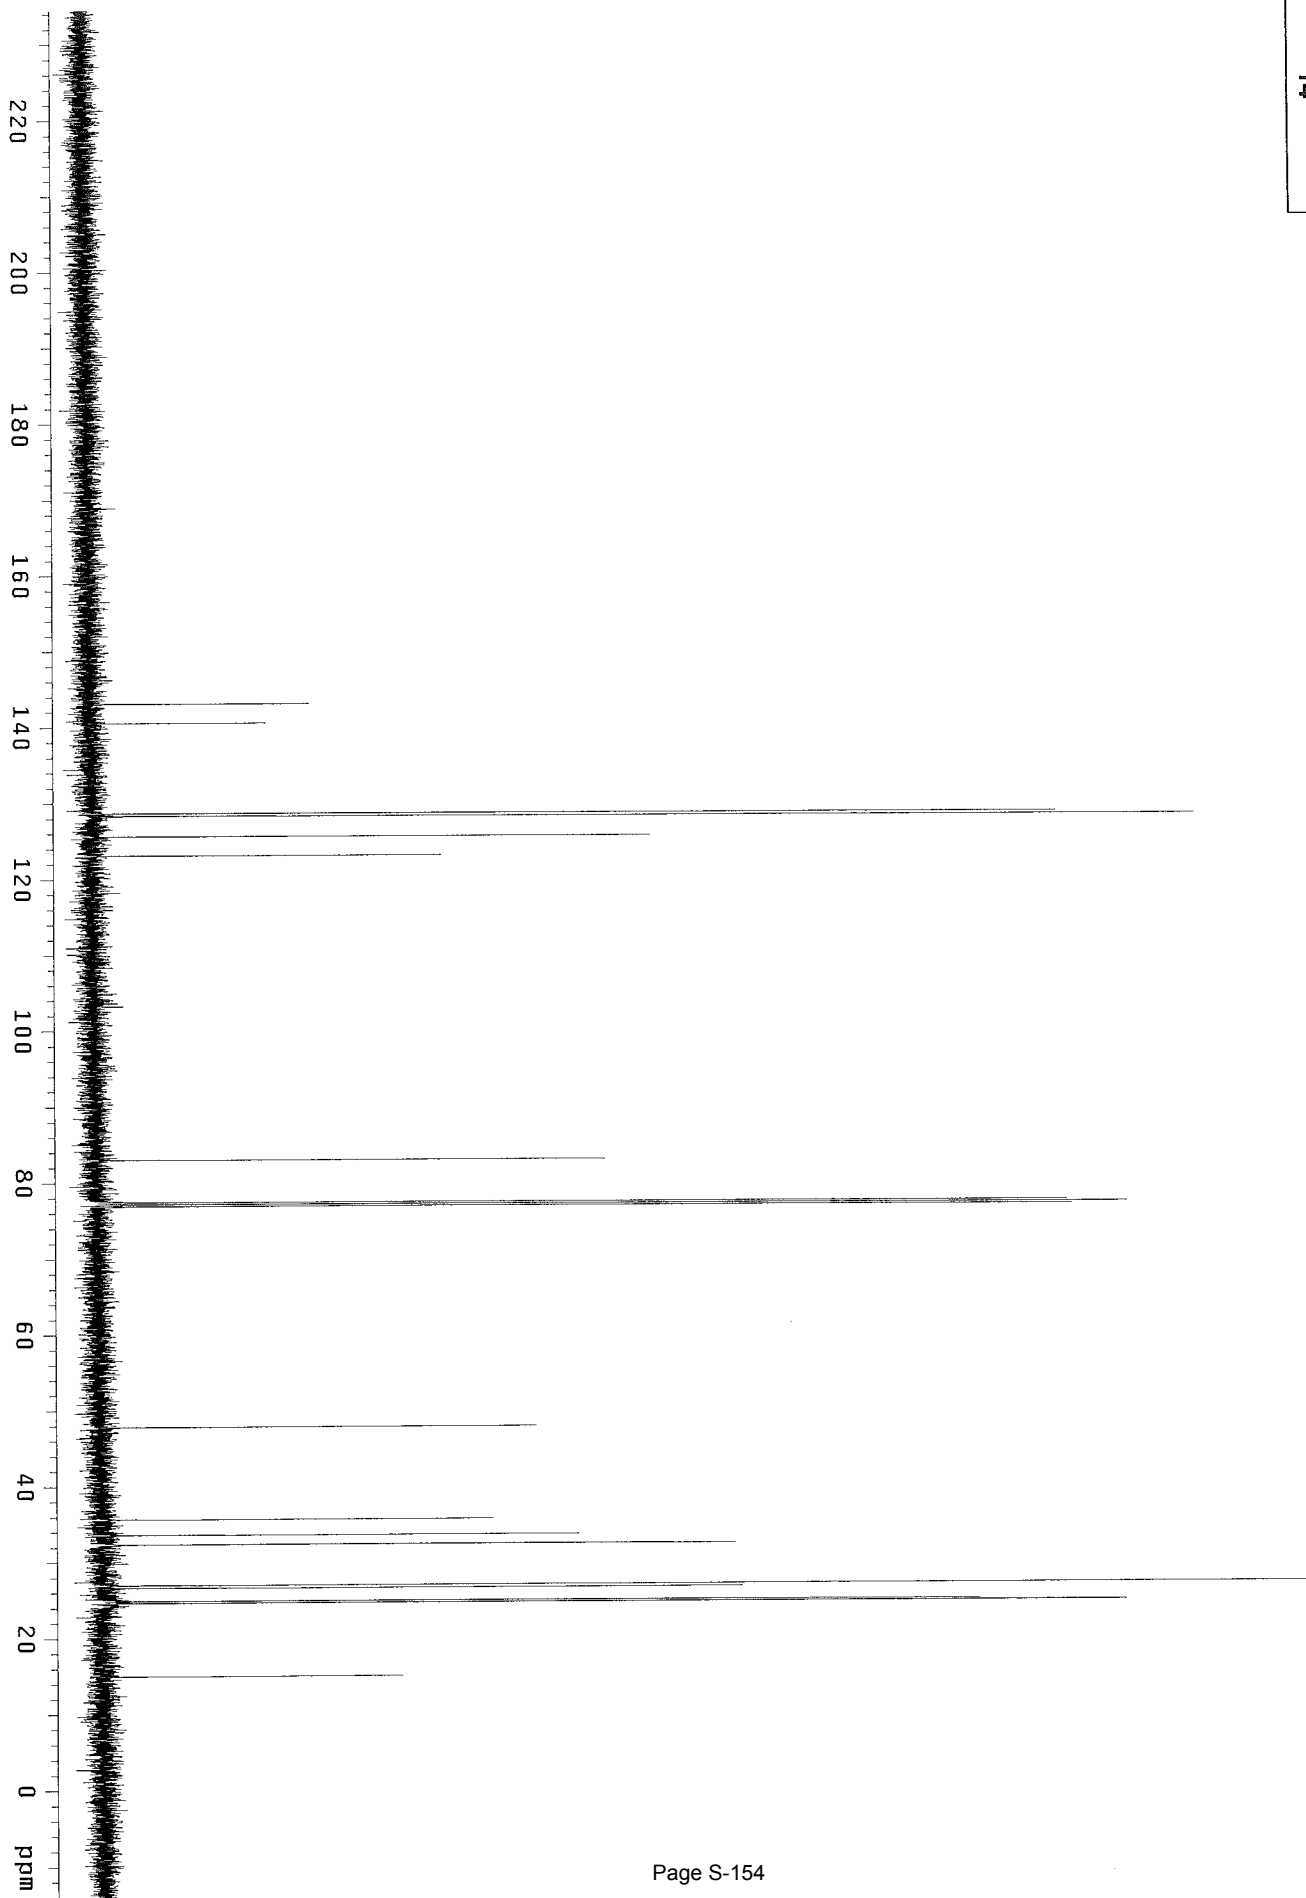

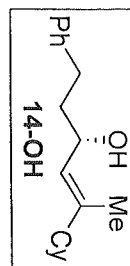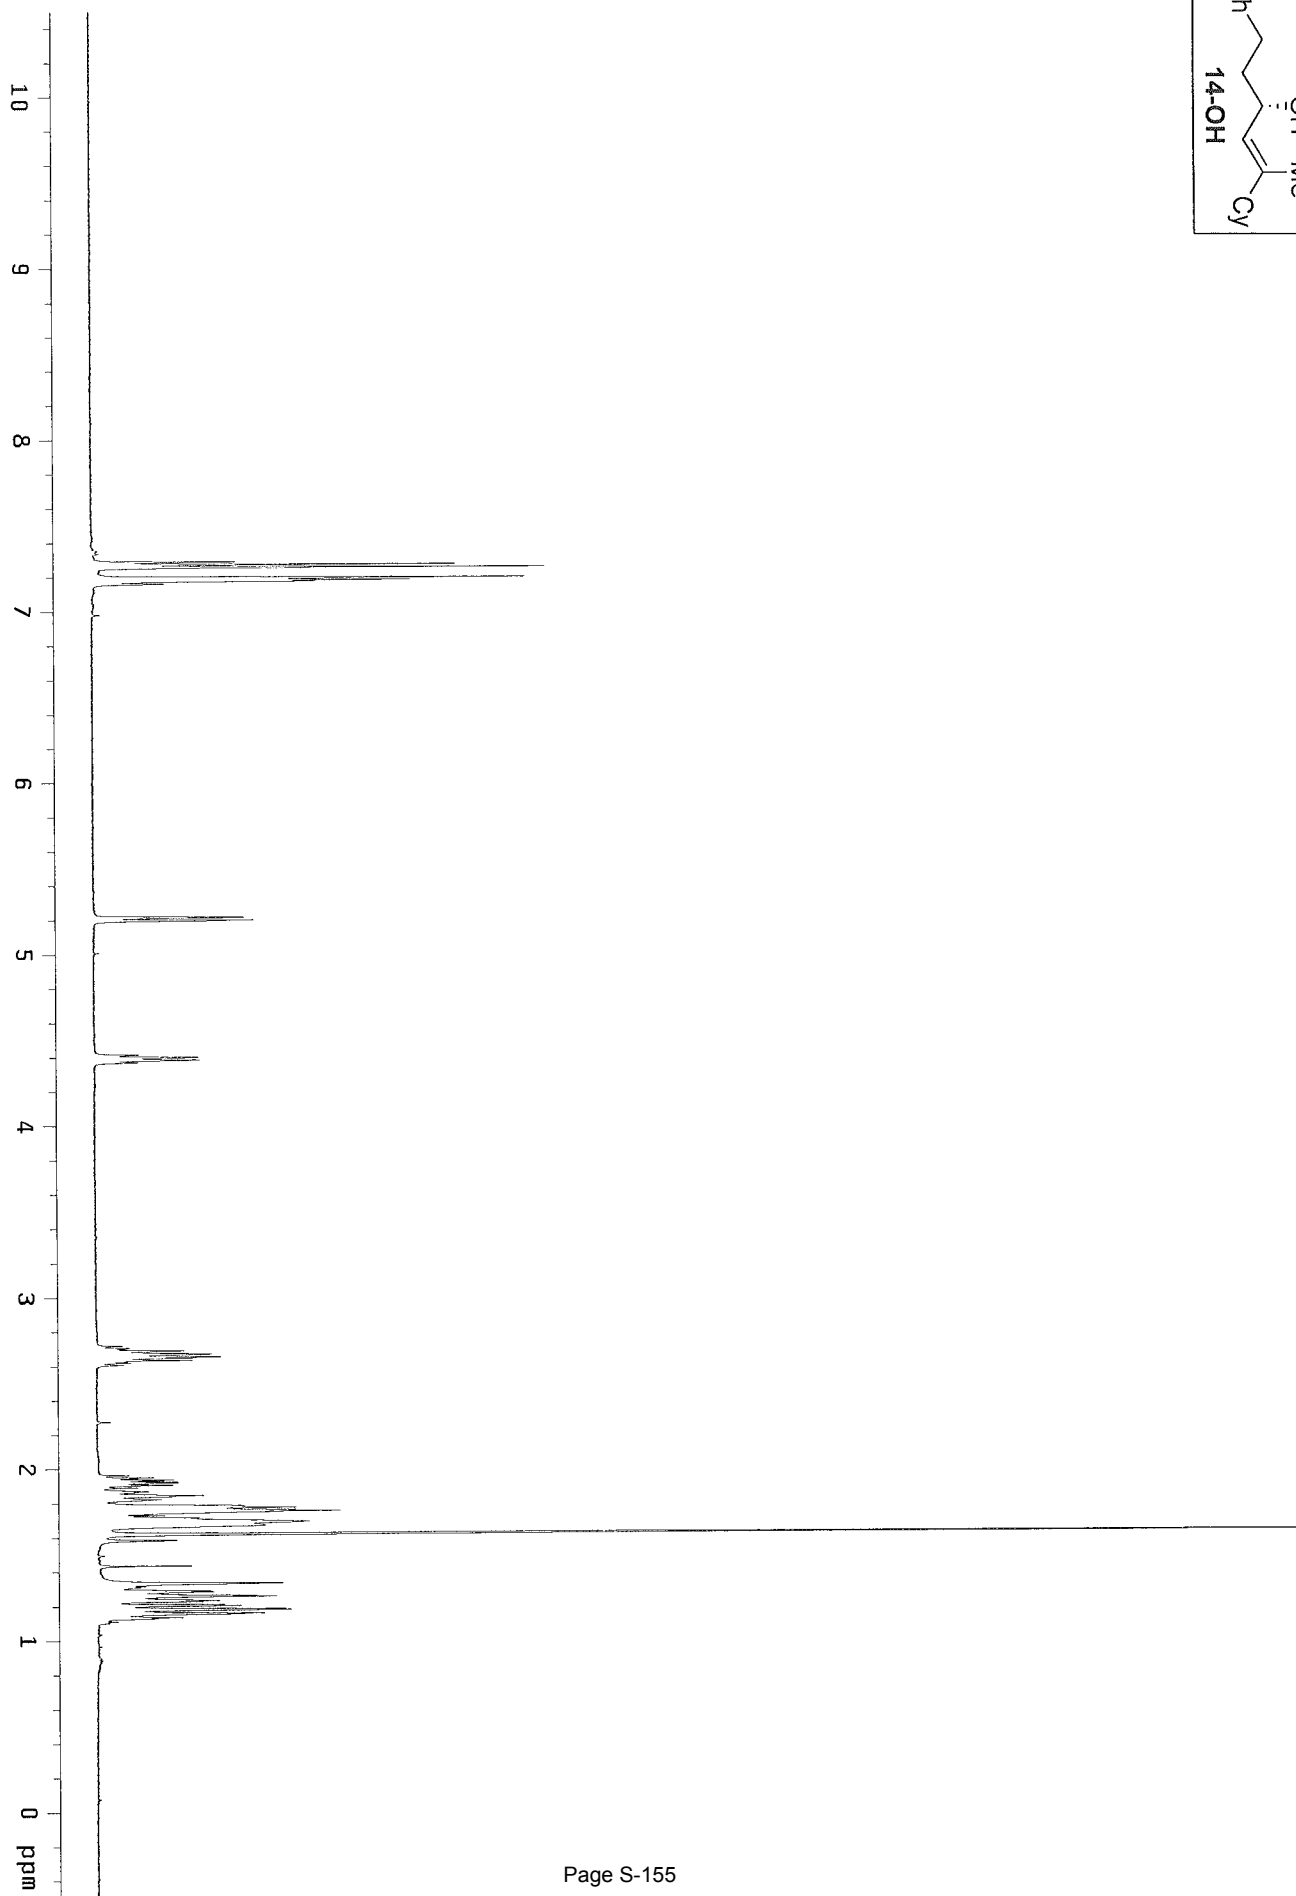

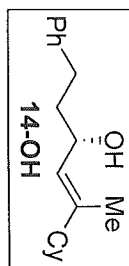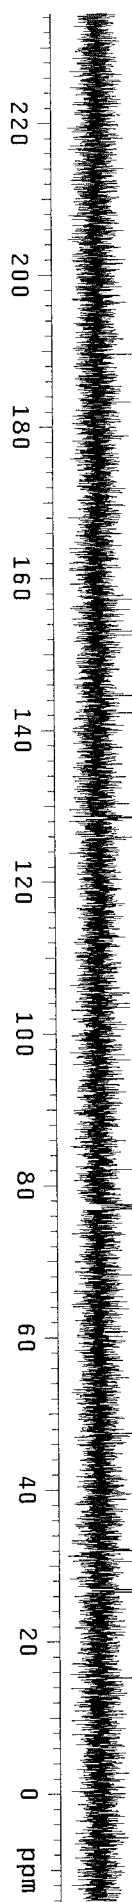

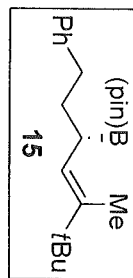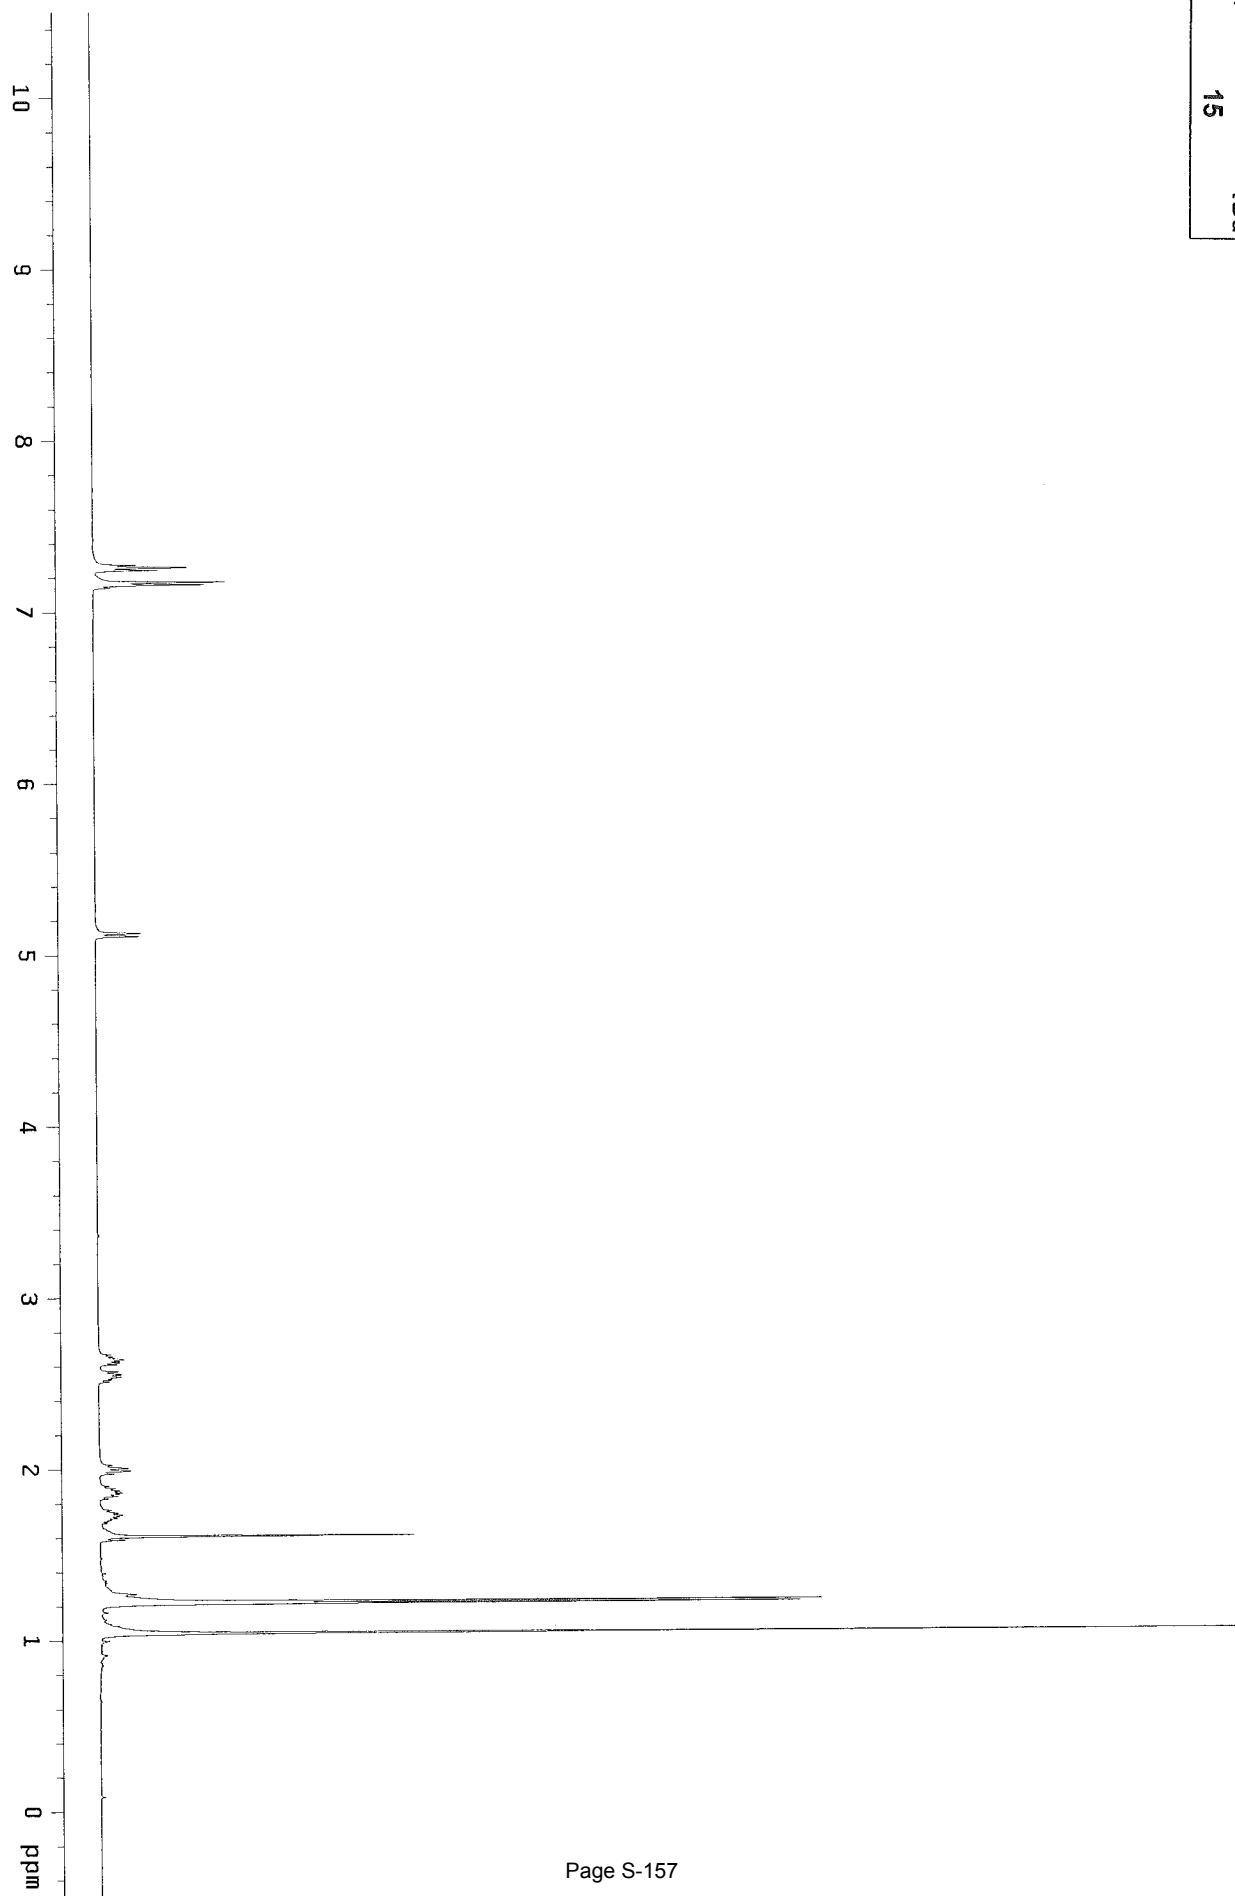

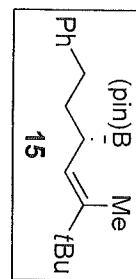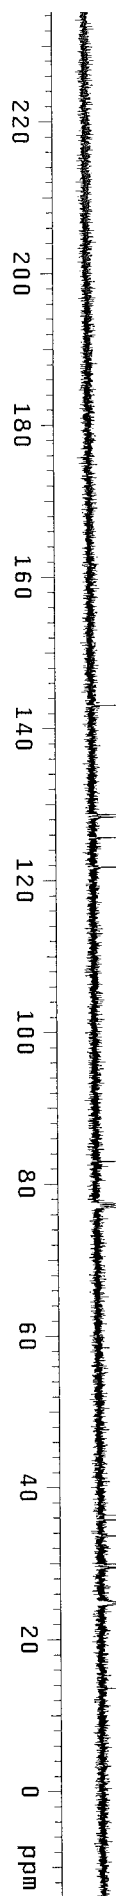

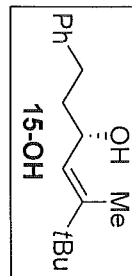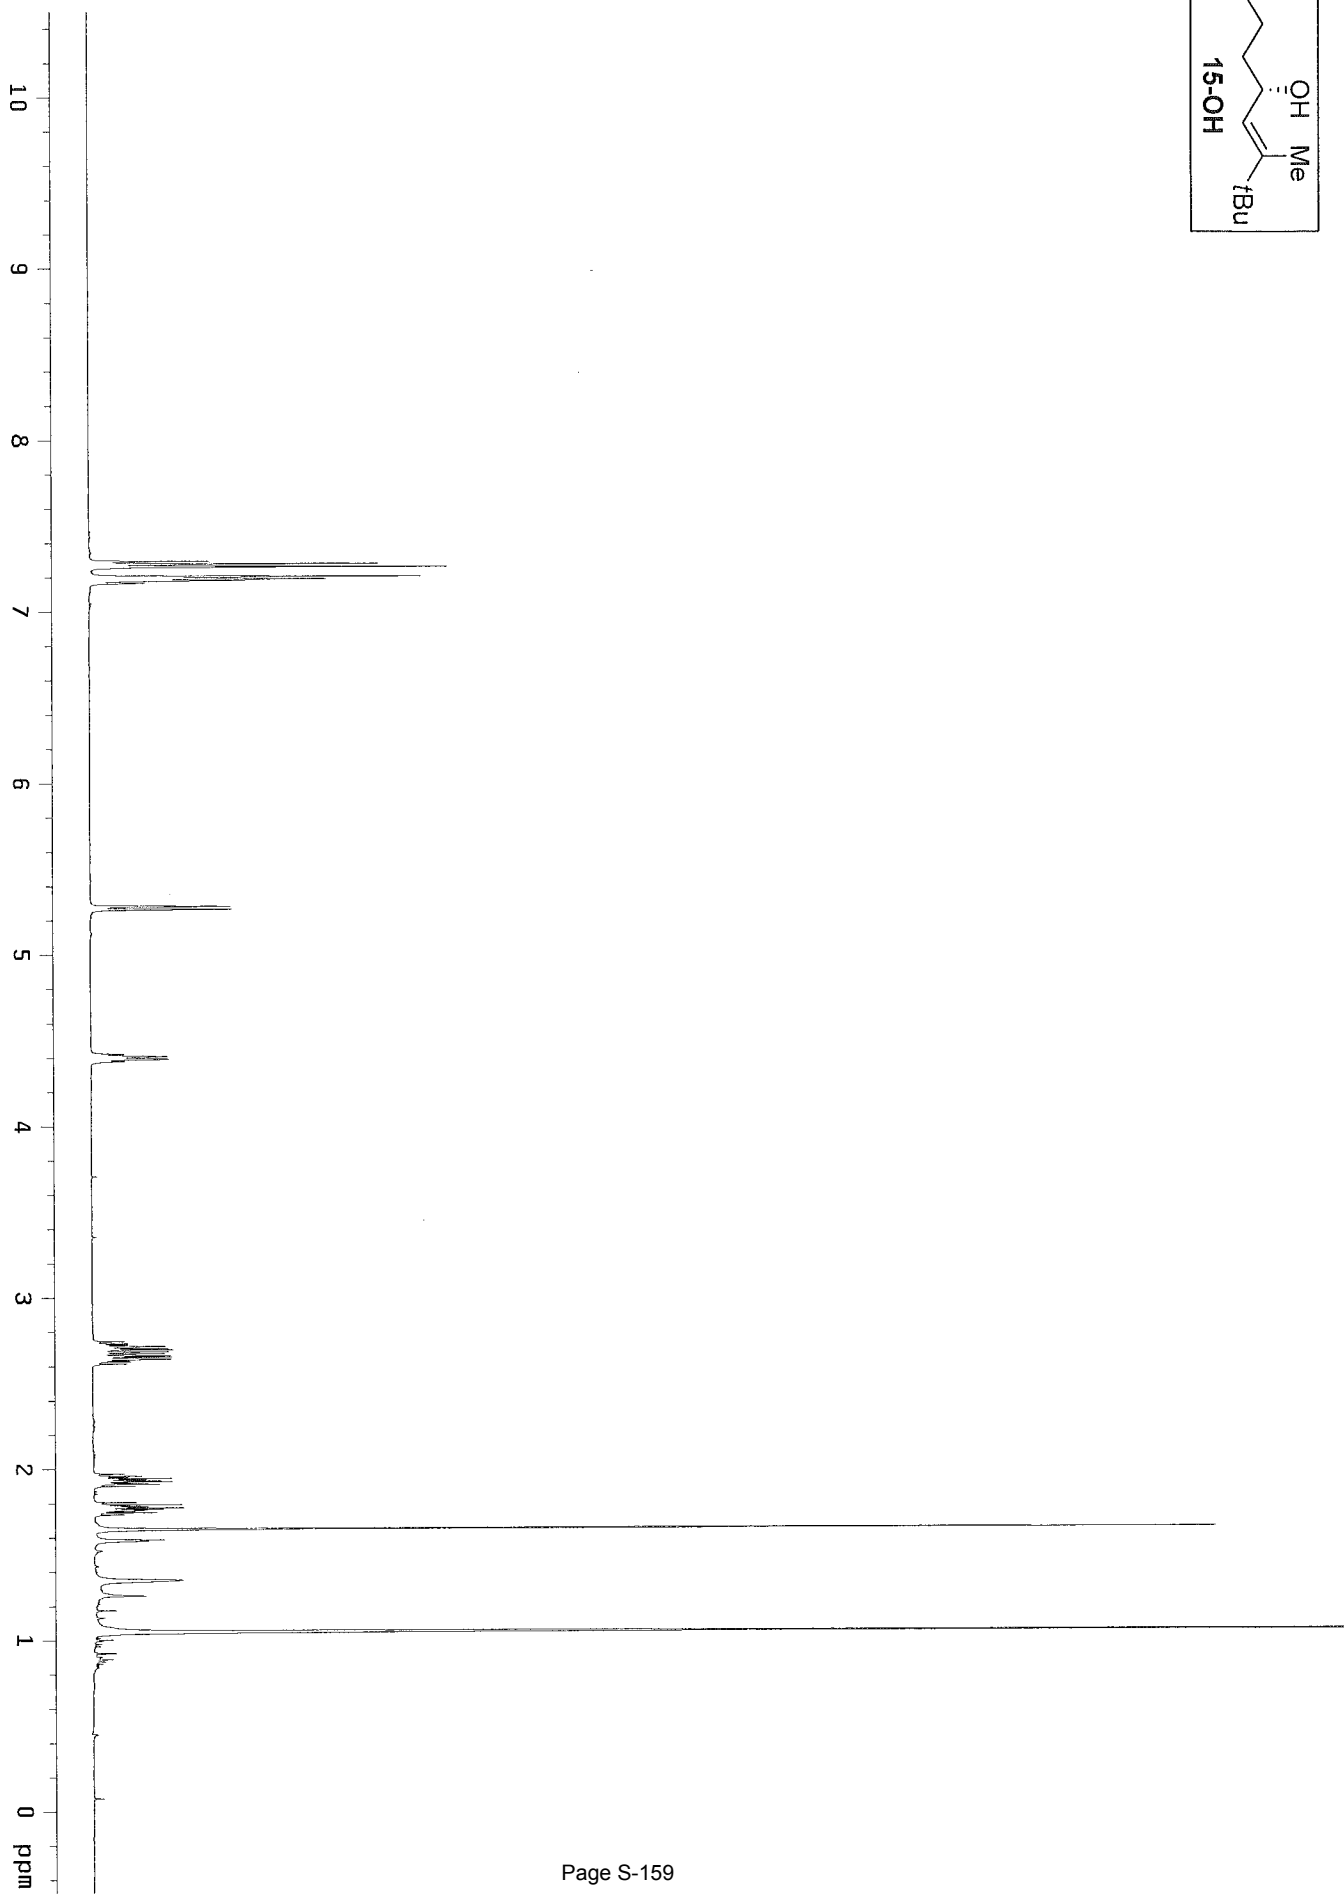

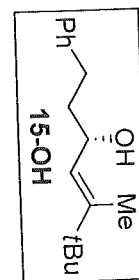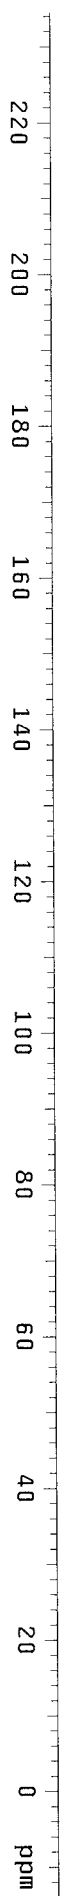



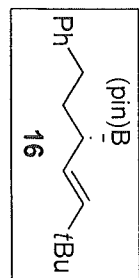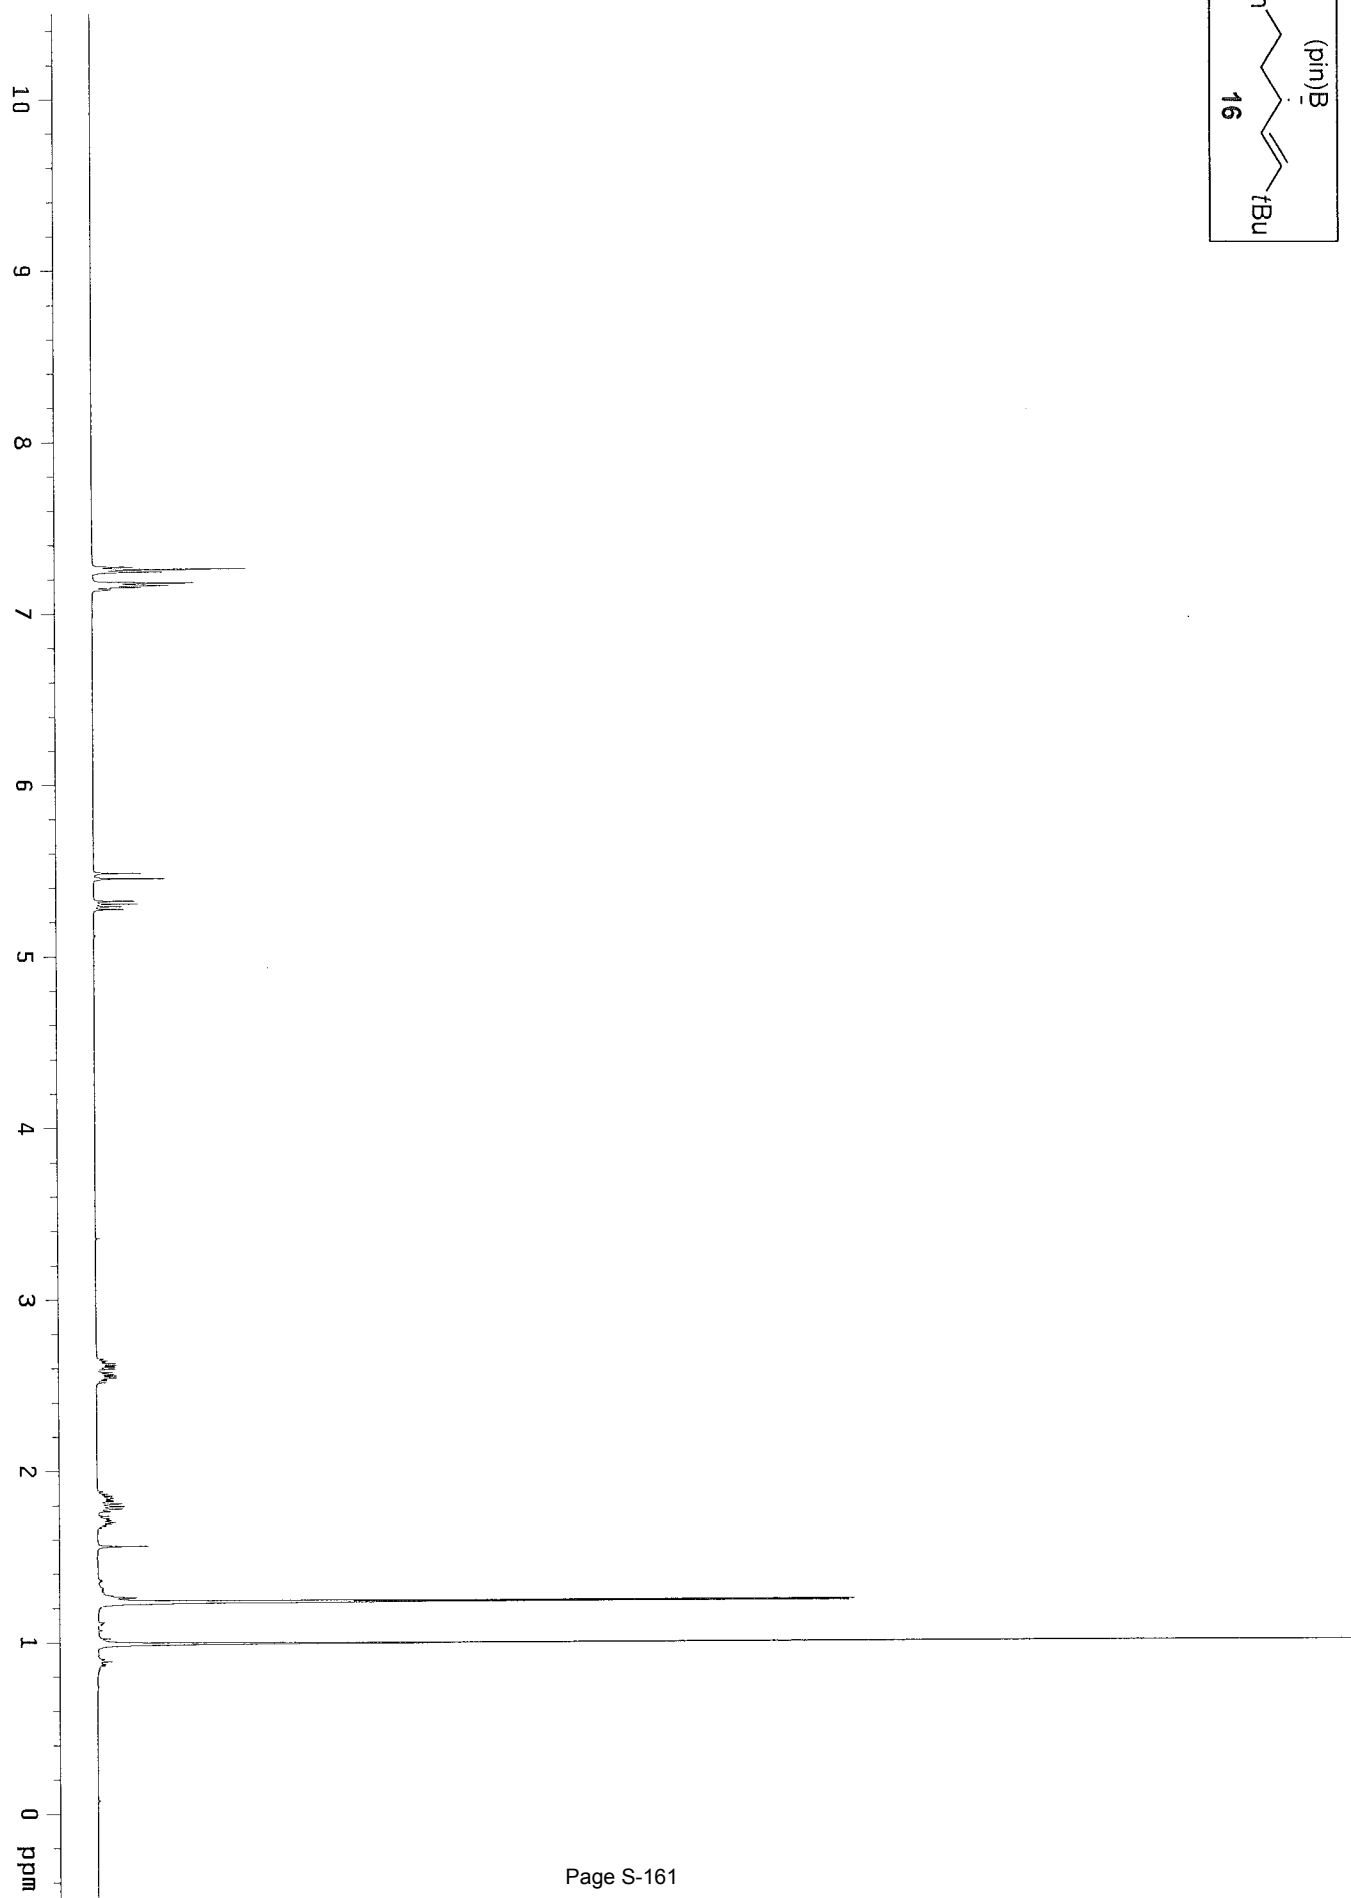

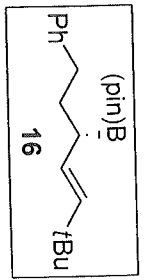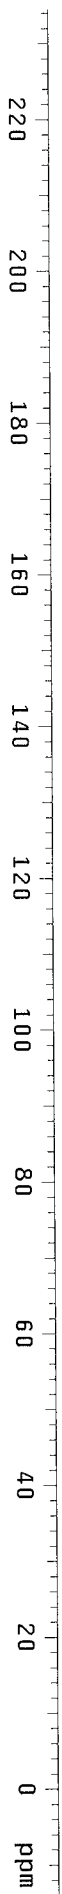

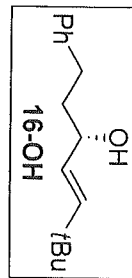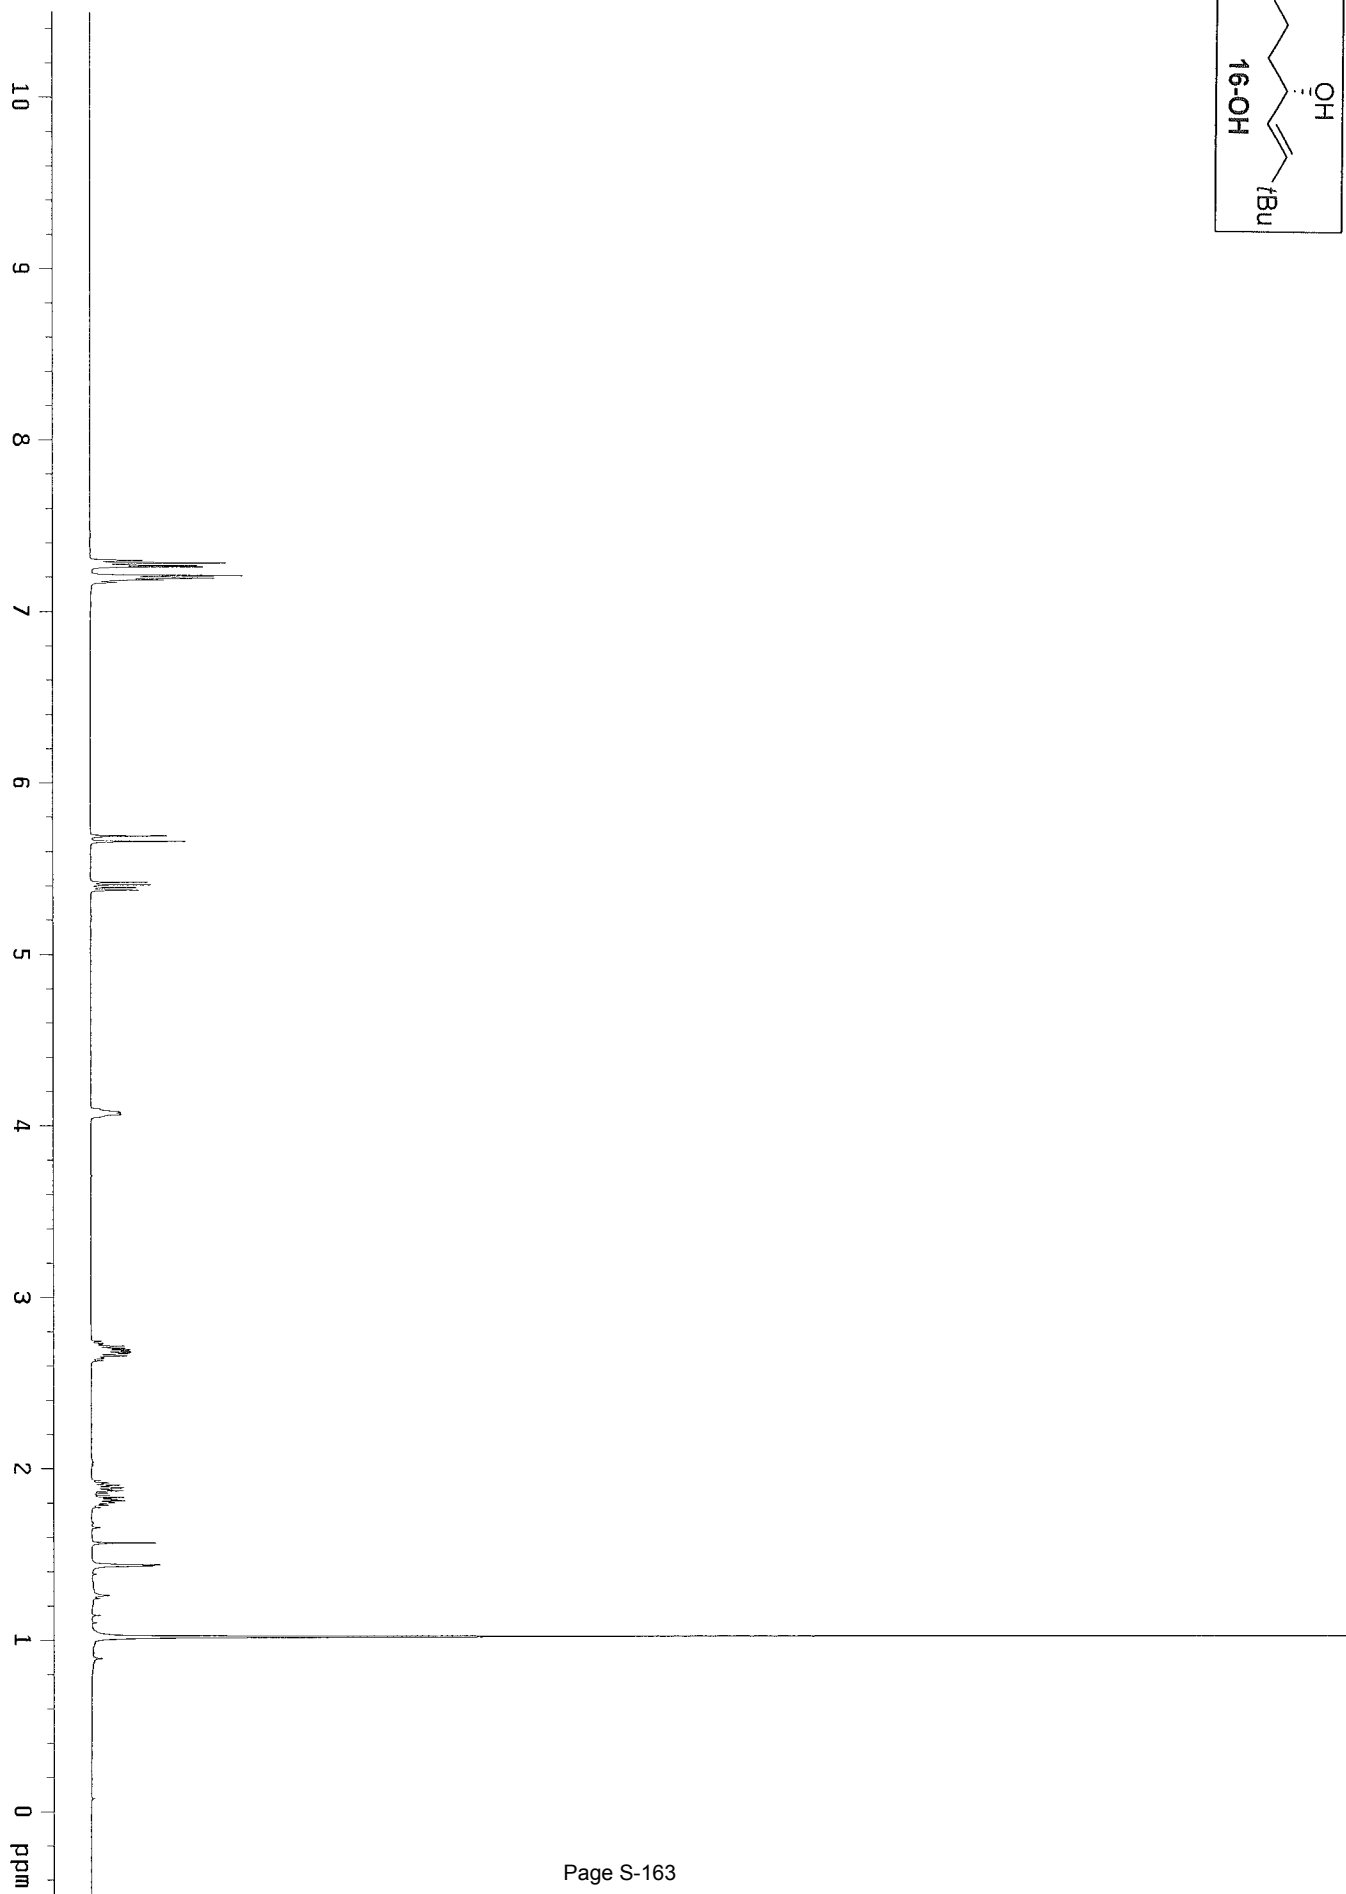

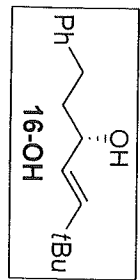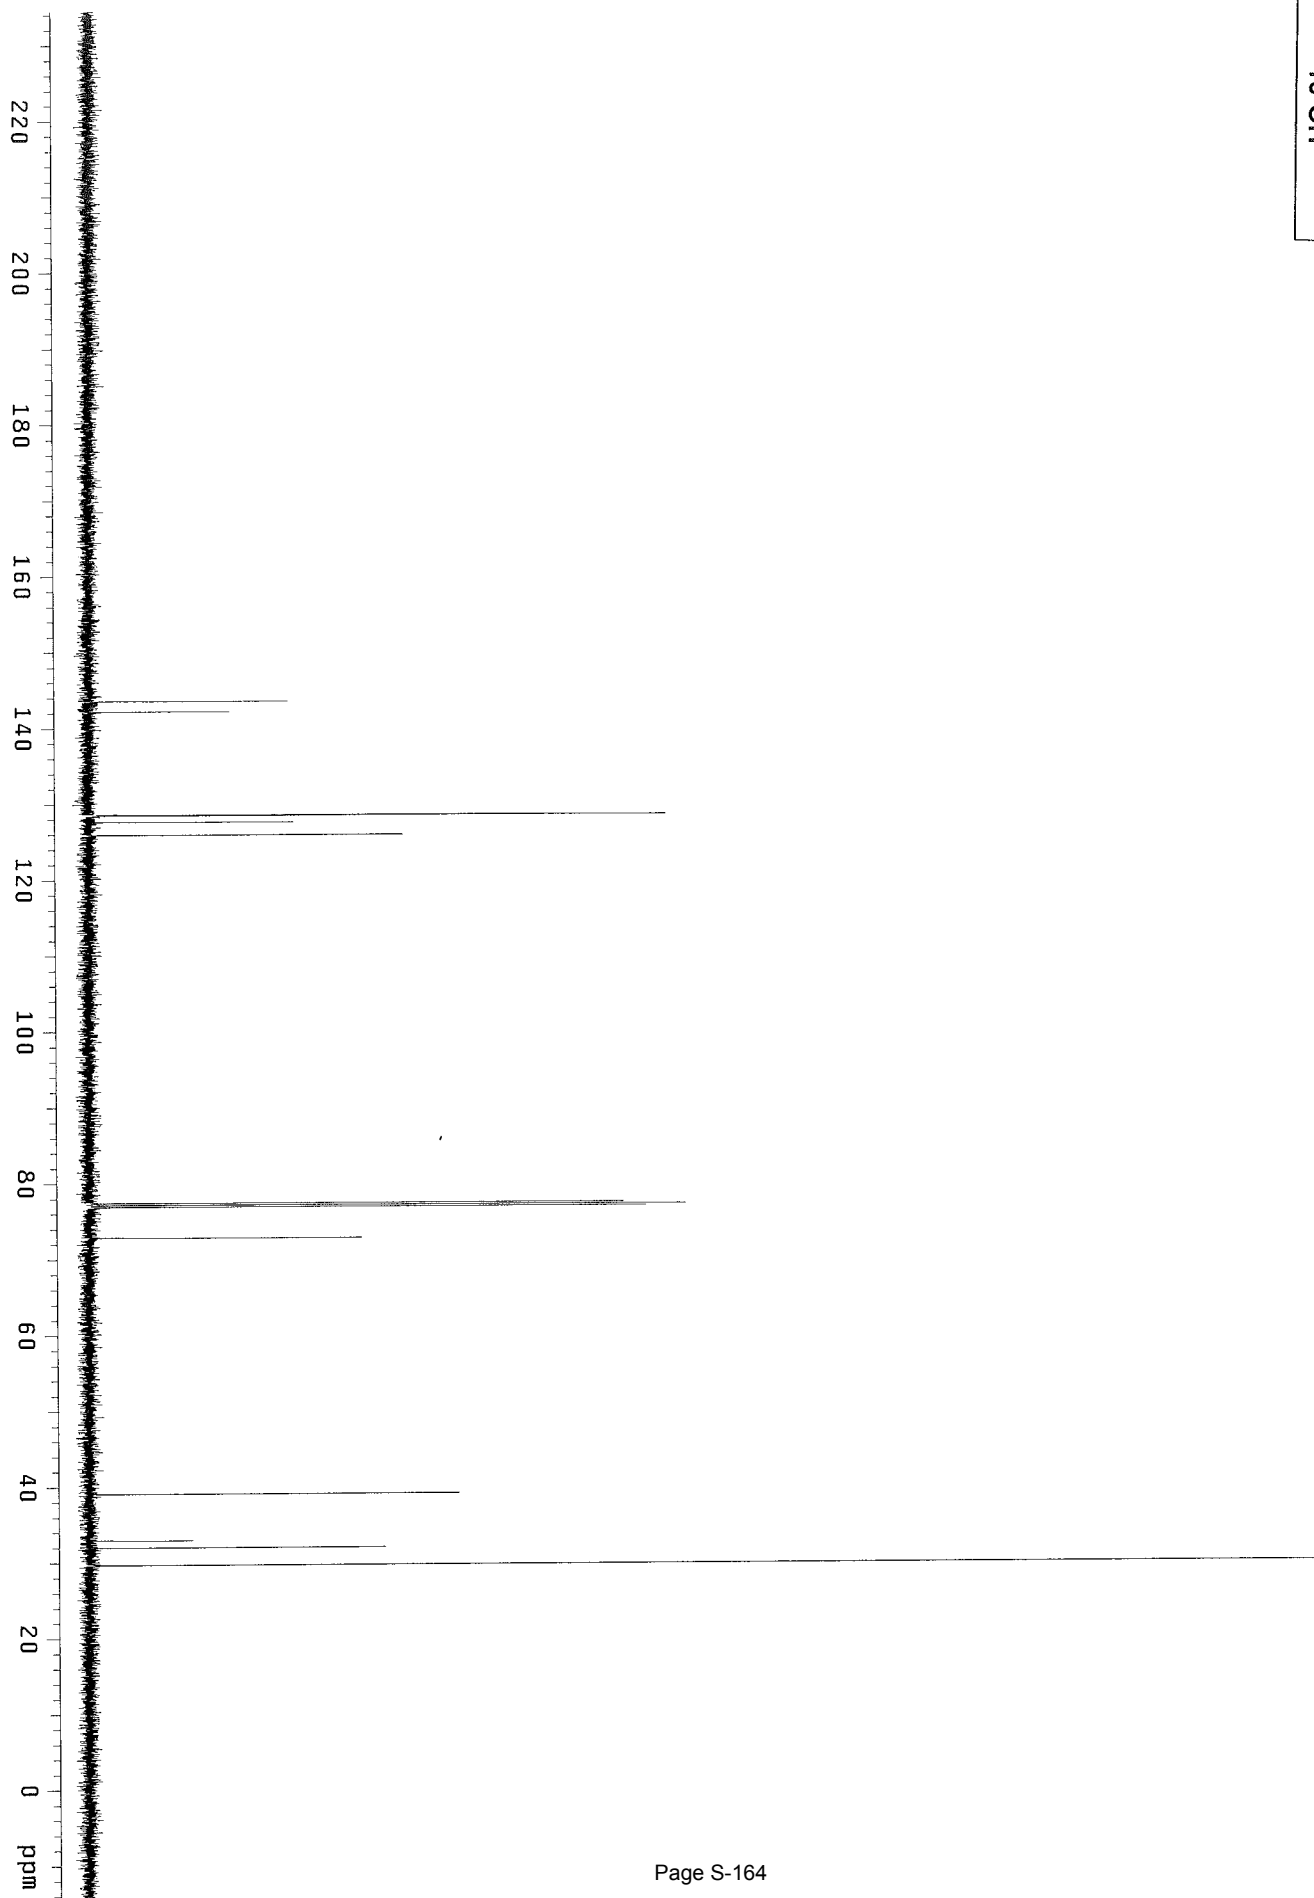

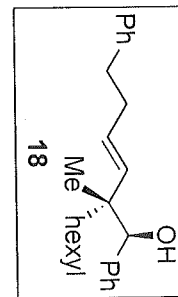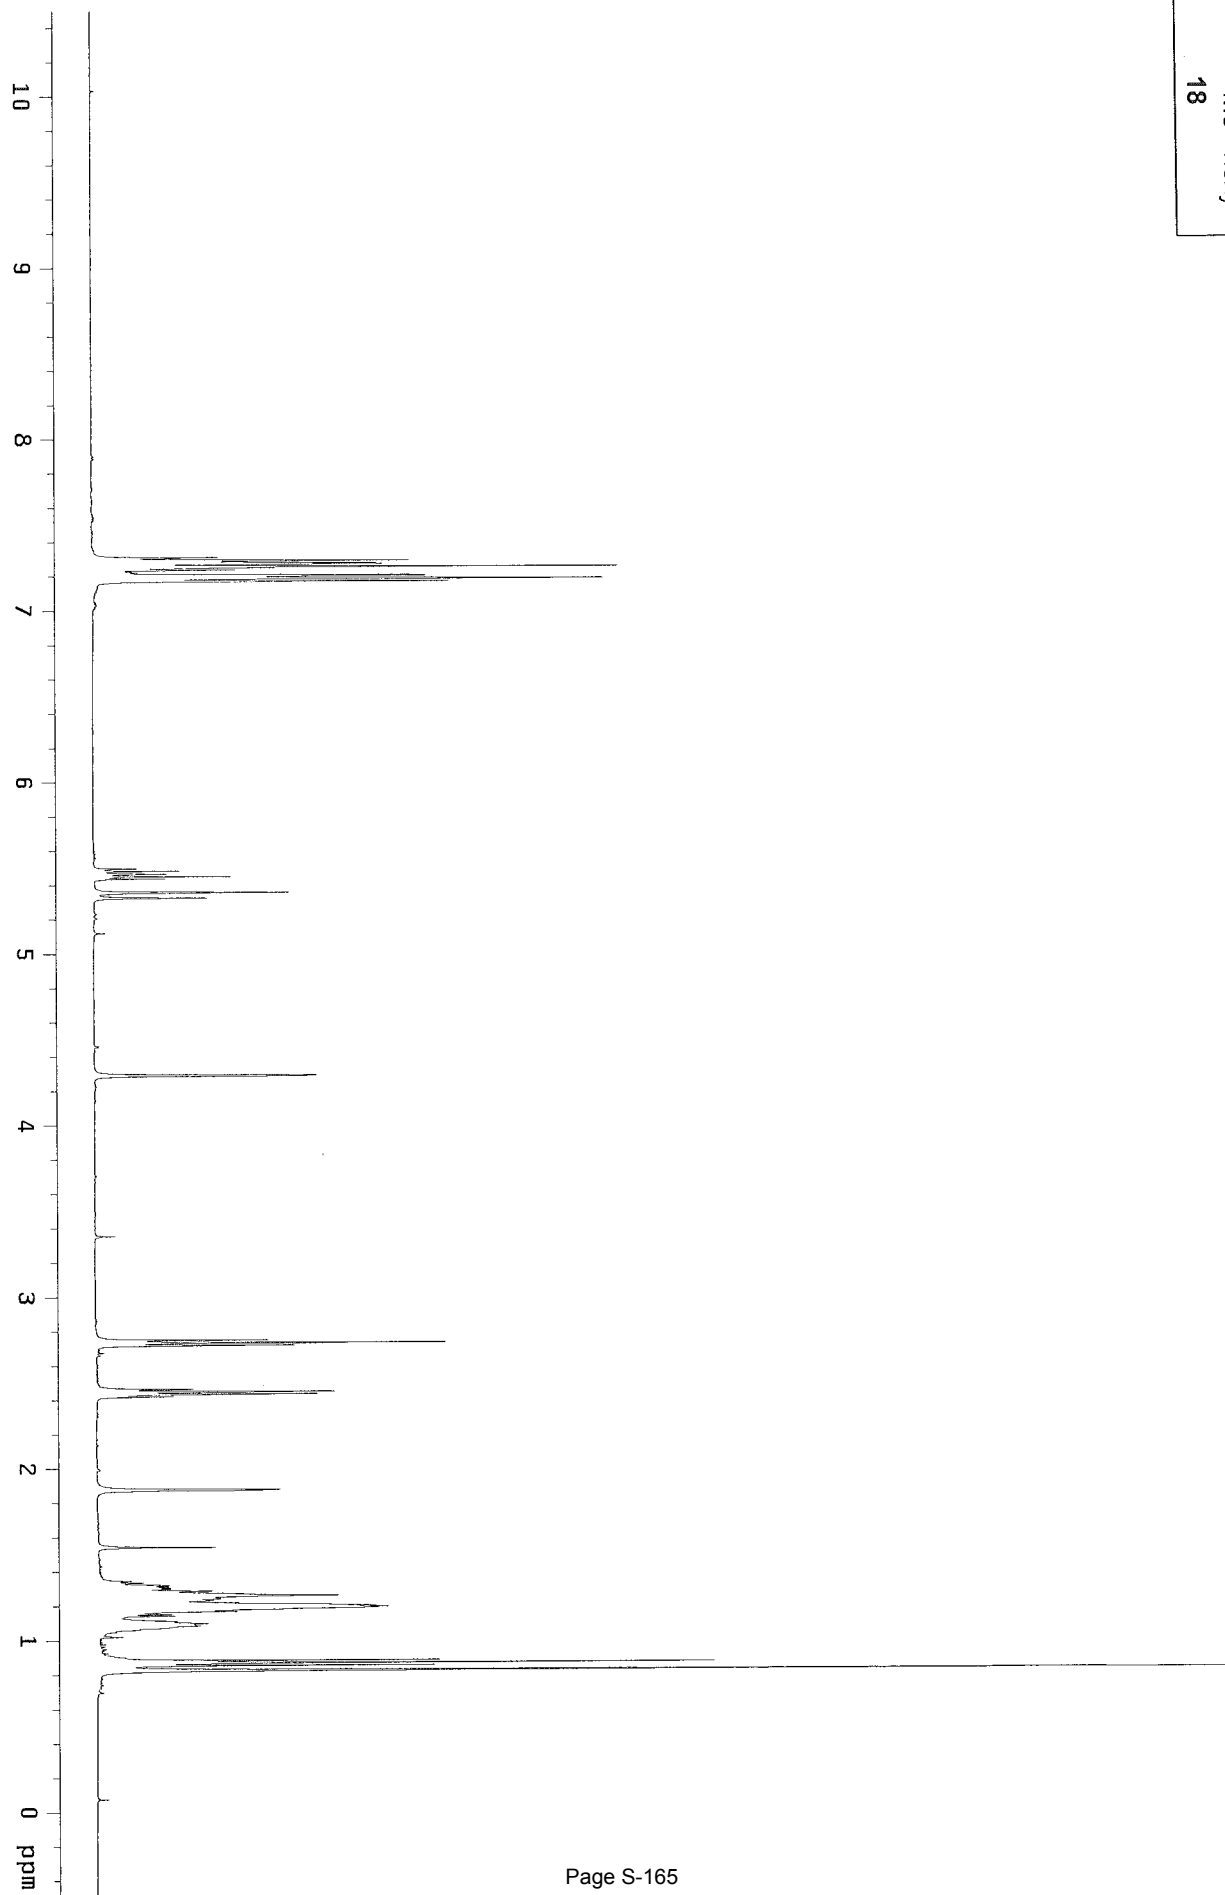

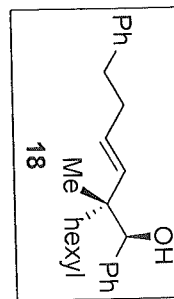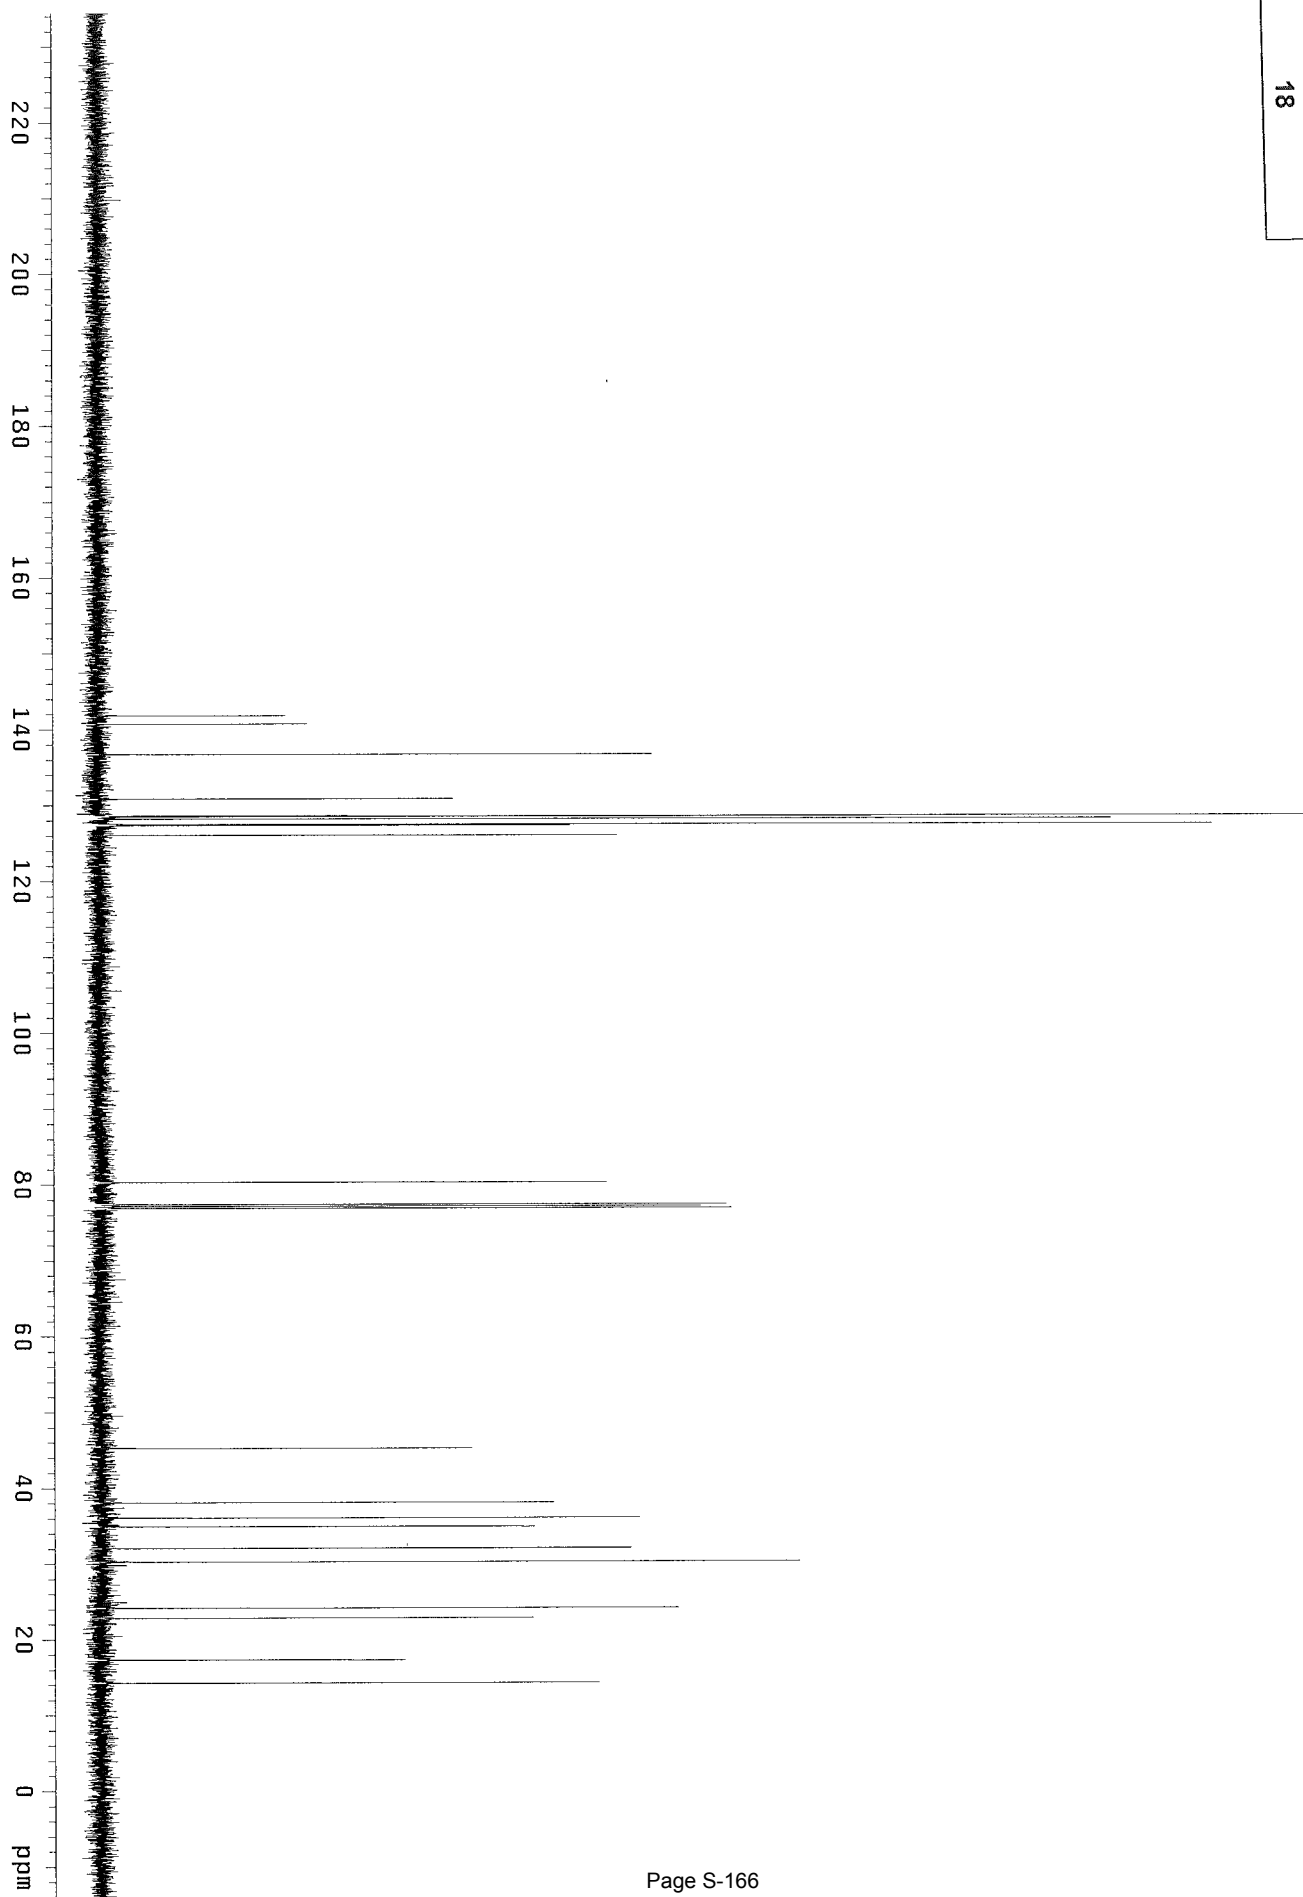

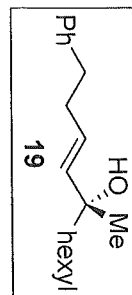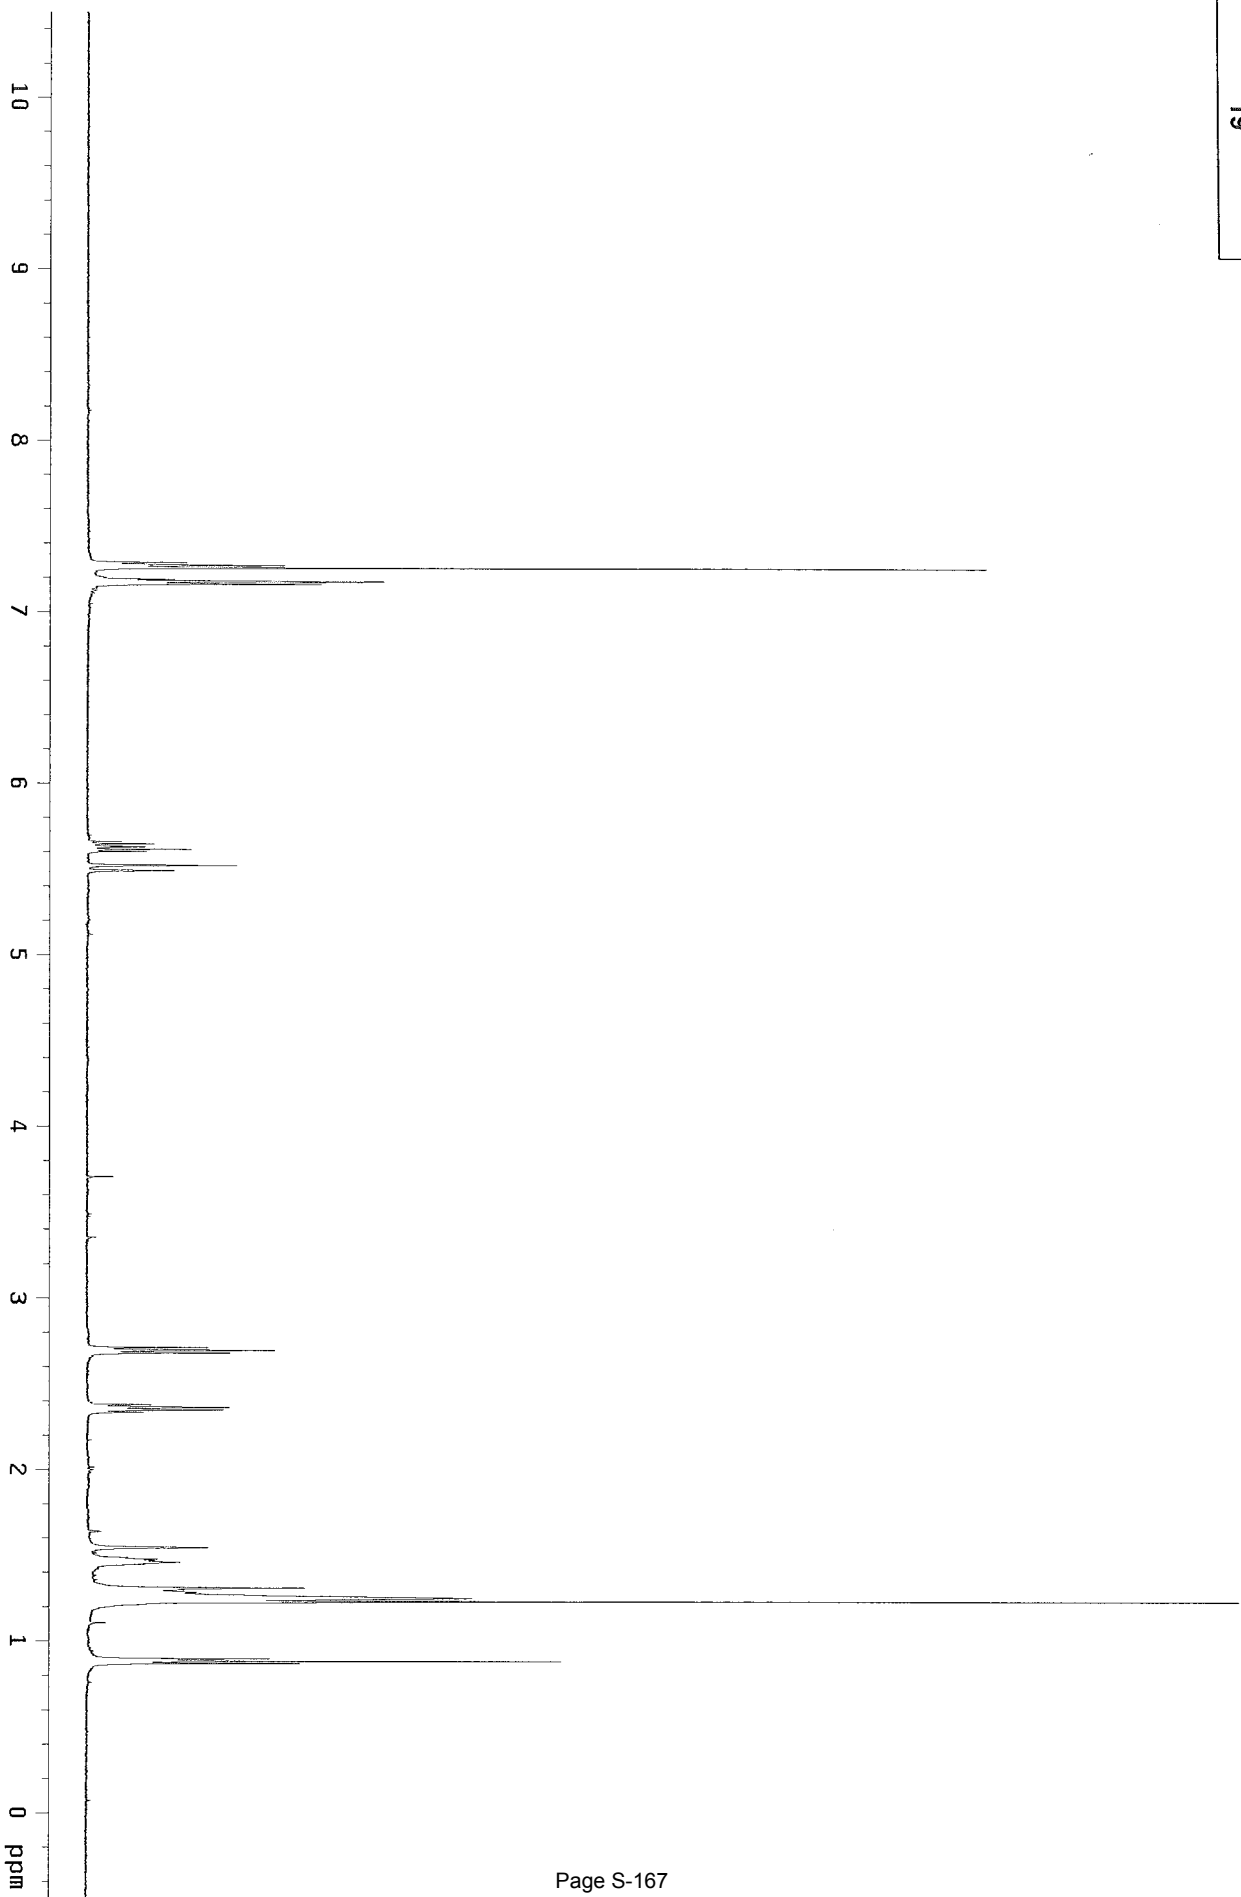

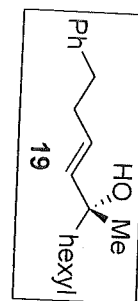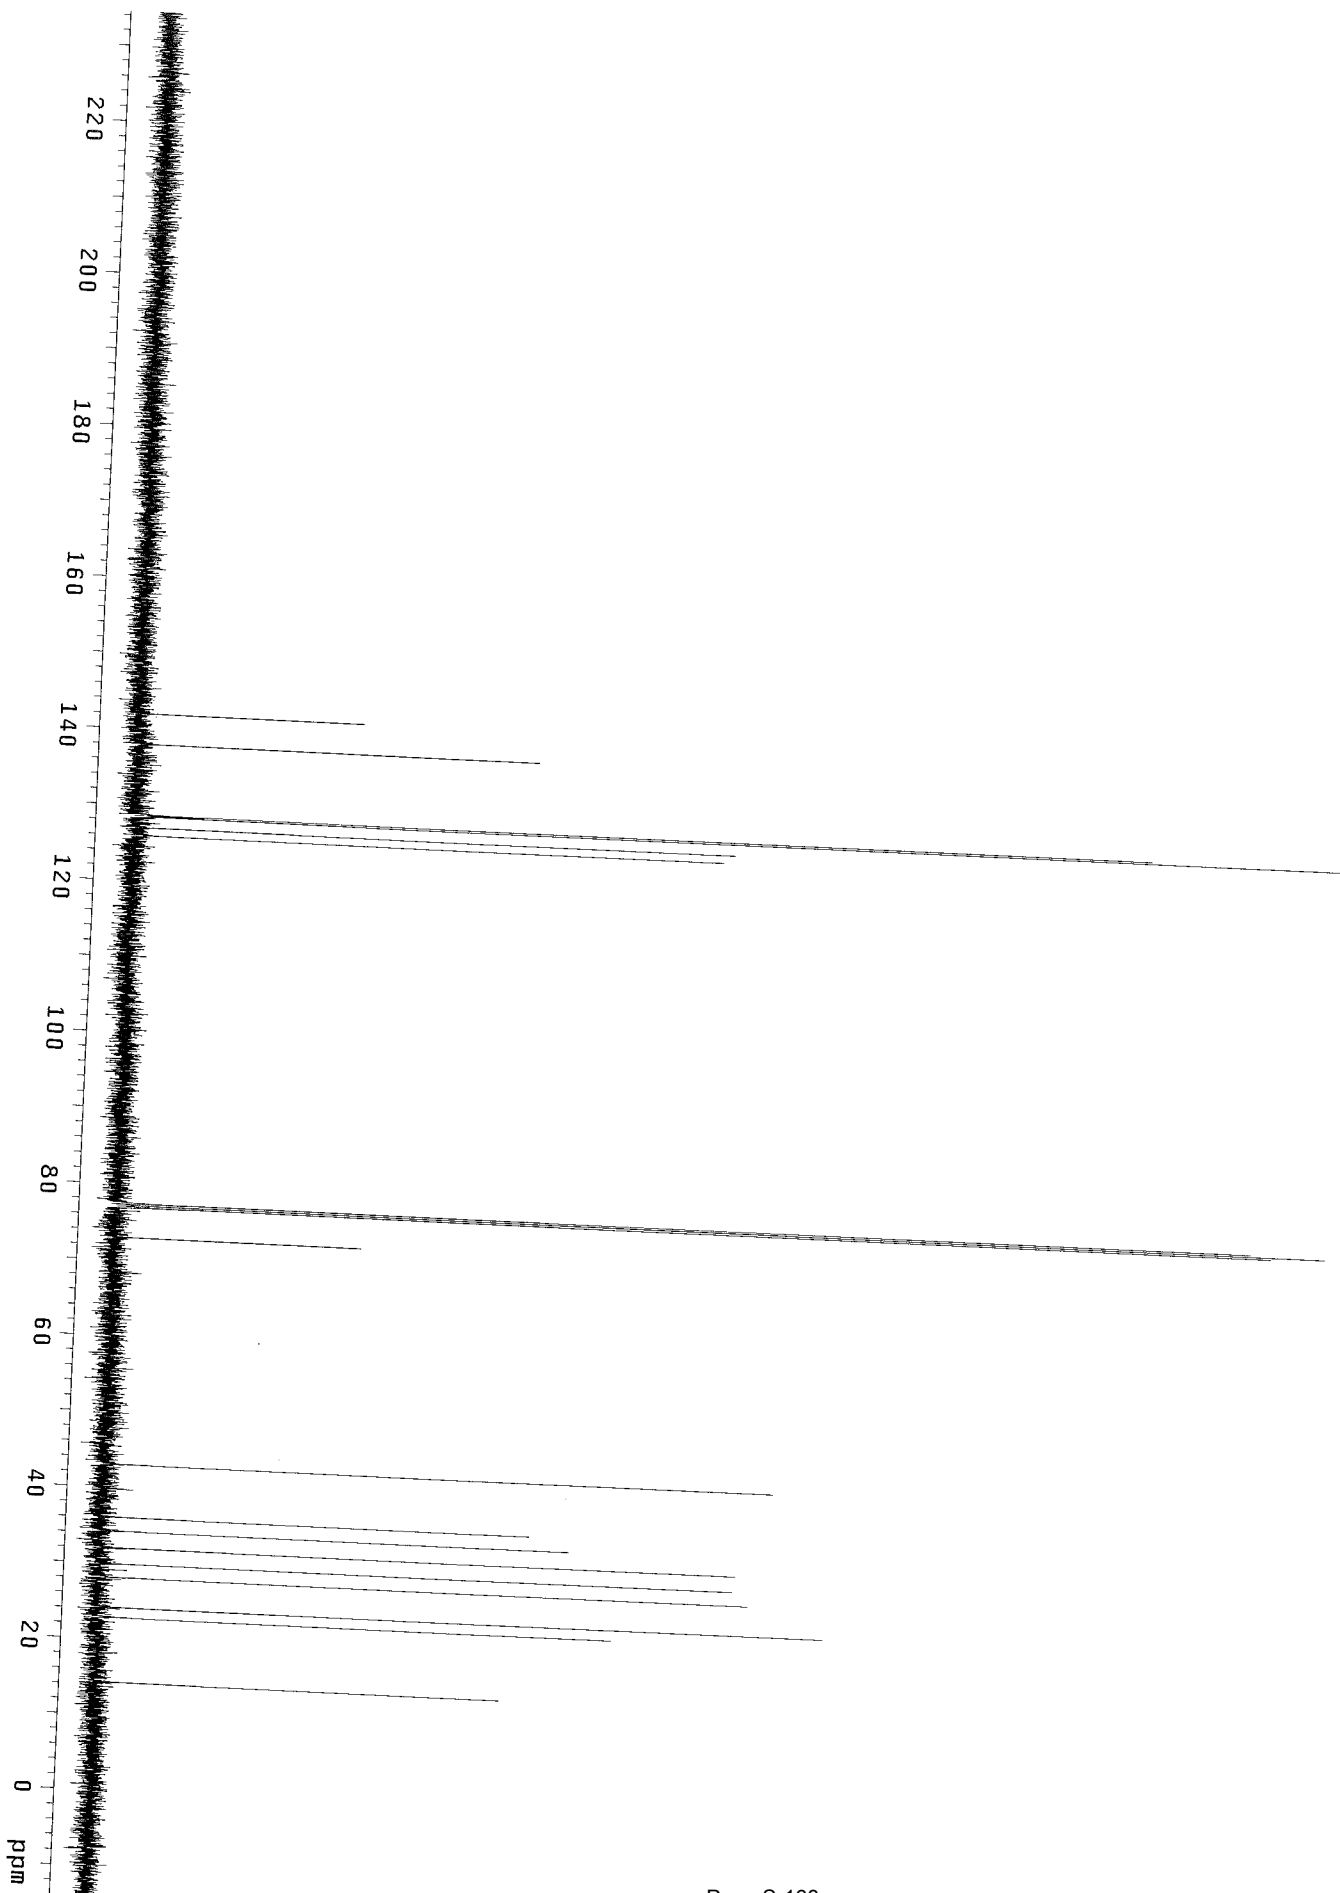

Supplement: ja510266x_si_001.pdf [file ja510266x_si_001.pdf]
